# Supplementary material
Source: publisher figshare collection journal article supplement (https://acs.figshare.com/ndownloader/files/11216279)
Supplement: Supplementary file 1 [file 11216279]

data_x15357 
 
_audit_creation_method            'SHELXL-2014/7 and CIFFIX' 
# CIF edited on-the-fly by script CIFFIX (S. Parkin, 2000-2014). 
# CIFFIX: http://xray.uky.edu/people/parkin/programs/ciffix 
_audit_update_record              ? 
 
_shelx_SHELXL_version_number      '2014/7' 
 
_publ_section_exptl_refinement 
; 
H atoms were found in difference Fourier maps, but subsequently included 
in the refinement using riding models, with constrained distances set to 
0.95 %A (C~sp2~H), 0.98 %A (RCH~3~) and 1.00 %A (R~3~CH).  U~iso~(H) 
parameters were set to values of either 1.2U~eq~ or 1.5U~eq~ (RCH~3~ only) 
of the attached atom. 
; 
 
_publ_section_references 
; 
Bruker-AXS (2006). 
  <i>APEX2</i> Bruker-AXS Inc., Madison, WI, USA. 
 
Hope, H. (1994). 
  <i>Prog. Inorg. Chem.</i> <b>41</b>, 1--19. 
 
Krause, L., Herbst-Irmer, R., Sheldrick, G.M. & Stalke, D. (2015). 
  <i>J. Appl. Cryst.</i> <b>48</b>, 3--10. 
 
Parkin, S. & Hope, H. (1998). 
  <i>J. Appl. Cryst.</i> <b>31</b>, 945--953. 
 
Parkin, S. (2000). 
  <i>Acta Cryst.</i> A<b>56</b>, 157--162. 
 
Parkin, S. (2013). 
  <i>CIFFIX</i>, http://xray.uky.edu/people/parkin/programs/ciffix 
 
Sheldrick, G.M. (2008). 
  <i>Acta Cryst.</i> A<b>64</b>, 112--122. 
 
Sheldrick, G.M. (2015a). 
  <i>Acta Cryst.</i> A<b>71</b>, 3--8. 
 
Sheldrick, G.M. (2015b). 
  <i>Acta Cryst.</i> C<b>71</b>, 3--8. 
 
Spek, A.L. (2009). 
  <i>Acta Cryst.</i> D<b>65</b>, 148--155. 
; 
 
_publ_section_acknowledgements 
; 
The X8 Proteum diffractometer was funded by the NSF (MRI CHE0319176, 70%), 
and by the University of Kentucky (cost share, 30%). 
; 
 
_chemical_name_systematic         ? 
_chemical_name_common             ? 
_chemical_melting_point           ? 
_chemical_formula_moiety          'C50 H50 N2 O4 Si' 
_chemical_formula_sum             'C50 H50 N2 O4 Si' 
_chemical_formula_weight          771.01 
 
loop_ 
 _atom_type_symbol 
 _atom_type_description 
 _atom_type_scat_dispersion_real 
 _atom_type_scat_dispersion_imag 
 _atom_type_scat_source 
 'C'  'C'   0.0181   0.0091 
 'International Tables Vol C Tables 4.2.6.8 and 6.1.1.4' 
 'H'  'H'   0.0000   0.0000 
 'International Tables Vol C Tables 4.2.6.8 and 6.1.1.4' 
 'N'  'N'   0.0311   0.0180 
 'International Tables Vol C Tables 4.2.6.8 and 6.1.1.4' 
 'O'  'O'   0.0492   0.0322 
 'International Tables Vol C Tables 4.2.6.8 and 6.1.1.4' 
 'Si'  'Si'   0.2541   0.3302 
 'International Tables Vol C Tables 4.2.6.8 and 6.1.1.4' 
 
_space_group_crystal_system       monoclinic 
_space_group_IT_number            14 
_space_group_name_H-M_alt         'P 21/n' 
_space_group_name_Hall            '-P 2yn' 
 
_shelx_space_group_comment 
; 
The symmetry employed for this shelxl refinement is uniquely defined 
by the following loop, which should always be used as a source of 
symmetry information in preference to the above space-group names. 
They are only intended as comments. 
; 
 
loop_ 
 _space_group_symop_operation_xyz 
 'x, y, z' 
 '-x+1/2, y+1/2, -z+1/2' 
 '-x, -y, -z' 
 'x-1/2, -y-1/2, z-1/2' 
 
_cell_length_a                    12.7873(3) 
_cell_length_b                    10.2281(2) 
_cell_length_c                    32.4829(7) 
_cell_angle_alpha                 90 
_cell_angle_beta                  96.682(1) 
_cell_angle_gamma                 90 
_cell_volume                      4219.57(16) 
_cell_formula_units_Z             4 
_cell_measurement_temperature     90.0(2) 
_cell_measurement_reflns_used     9931 
_cell_measurement_theta_min       3.59 
_cell_measurement_theta_max       68.09 
 
_exptl_crystal_description        'irregular block' 
_exptl_crystal_colour             orange 
_exptl_crystal_density_meas       ? 
_exptl_crystal_density_method     ? 
_exptl_crystal_density_diffrn     1.214 
_exptl_crystal_F_000              1640 
_exptl_transmission_factor_min    ? 
_exptl_transmission_factor_max    ? 
_exptl_crystal_size_max           0.350 
_exptl_crystal_size_mid           0.300 
_exptl_crystal_size_min           0.280 
_exptl_absorpt_coefficient_mu     0.859 
_shelx_estimated_absorpt_T_min    0.753 
_shelx_estimated_absorpt_T_max    0.795 
_exptl_absorpt_correction_type    multi-scan 
_exptl_absorpt_correction_T_min   0.708 
_exptl_absorpt_correction_T_max   0.864 
_exptl_absorpt_process_details    '<i>SADABS</i> (Krause et al., 2015)' 
_exptl_absorpt_special_details 
; 
In addition to absorption, multi-scan techniques also correct other slowly 
varying changes in scale factor over reciprocal space, such as those caused 
by x-ray beam inhomogeneity, goniometer imperfection, crystal decomposition, 
crystal longer than the x-ray beam cross section, absorption by the crystal 
mount etc.  These account, by and large, for much of the difference between 
estimated values of Tmin and Tmax and the _exptl_absorpt_correction_ values. 
; 
 
_exptl_special_details 
; 
The crystal was mounted using polyisobutene oil on the tip of a fine glass 
fibre, which was fastened in a copper mounting pin with electrical solder. 
It was placed directly into the cold gas stream of a liquid-nitrogen based 
cryostat (Hope, 1994; Parkin & Hope, 1998). 
 
Diffraction data were collected with the crystal at 90K, which is standard 
practice in this laboratory for the majority of flash-cooled crystals. 
; 
 
_diffrn_ambient_temperature       90.0(2) 
_diffrn_radiation_wavelength      1.54178 
_diffrn_radiation_type            CuK\a 
_diffrn_source                    'fine-focus rotating anode' 
_diffrn_measurement_device_type   'Bruker X8 Proteum diffractometer' 
_diffrn_measurement_method        '\f and \w scans' 
_diffrn_detector_area_resol_mean  5.6 
_diffrn_reflns_number             49533 
_diffrn_reflns_av_unetI/netI      0.0235 
_diffrn_reflns_av_R_equivalents   0.0435 
_diffrn_reflns_limit_h_min        -14 
_diffrn_reflns_limit_h_max        15 
_diffrn_reflns_limit_k_min        -6 
_diffrn_reflns_limit_k_max        12 
_diffrn_reflns_limit_l_min        -39 
_diffrn_reflns_limit_l_max        39 
_diffrn_reflns_theta_min          2.739 
_diffrn_reflns_theta_max          68.246 
_diffrn_reflns_theta_full         67.679 
_diffrn_measured_fraction_theta_max                0.990 
_diffrn_measured_fraction_theta_full               0.994 
_diffrn_reflns_Laue_measured_fraction_max          0.990 
_diffrn_reflns_Laue_measured_fraction_full         0.994 
_diffrn_reflns_point_group_measured_fraction_max   0.990 
_diffrn_reflns_point_group_measured_fraction_full  0.994 
 
_reflns_number_total              7642 
_reflns_number_gt                 7199 
_reflns_threshold_expression      'I > 2\s(I)' 
_reflns_Friedel_coverage          0.000 
_reflns_Friedel_fraction_max      . 
_reflns_Friedel_fraction_full     . 
_reflns_special_details 
; 
Reflections were merged by SHELXL according to the crystal 
class for the calculation of statistics and refinement. 
 
_reflns_Friedel_fraction is defined as the number of unique 
Friedel pairs measured divided by the number that would be 
possible theoretically, ignoring centric projections and 
systematic absences. 
; 
 
_computing_data_collection        '<i>APEX2</i> (Bruker-AXS, 2006)' 
_computing_cell_refinement        '<i>APEX2</i> (Bruker-AXS, 2006)' 
_computing_data_reduction         '<i>APEX2</i> (Bruker-AXS, 2006)' 
_computing_structure_solution     '<i>SHELXT</i> (Sheldrick, 2015a)' 
_computing_structure_refinement   '<i>SHELXL-2014/7</i> (Sheldrick, 2015b)' 
_computing_molecular_graphics     '<i>XP in SHELXTL</i> (Sheldrick, 2008)' 
_computing_publication_material 
'<i>SHELX</i> (Sheldrick, 2008) and <i>CIFFIX</i> (Parkin, 2013)' 
 
_refine_special_details 
; 
Refinement progress was checked using <i>Platon</i> (Spek, 2009) and by 
an <i>R</i>-tensor (Parkin, 2000). The final model was further checked 
with the IUCr utility <i>checkCIF</i>. 
; 
_refine_ls_structure_factor_coef  Fsqd 
_refine_ls_matrix_type            full 
_refine_ls_weighting_scheme       calc 
_refine_ls_weighting_details 
'w=1/[\s^2^(Fo^2^)+(0.0448P)^2^+2.7658P] where P=(Fo^2^+2Fc^2^)/3' 
_atom_sites_solution_primary      direct 
_atom_sites_solution_secondary    difmap 
_atom_sites_solution_hydrogens    difmap 
_refine_ls_hydrogen_treatment     constr 
_refine_ls_extinction_method      none 
_refine_ls_extinction_coef        . 
_refine_ls_number_reflns          7642 
_refine_ls_number_parameters      522 
_refine_ls_number_restraints      0 
_refine_ls_R_factor_all           0.0431 
_refine_ls_R_factor_gt            0.0410 
_refine_ls_wR_factor_ref          0.1063 
_refine_ls_wR_factor_gt           0.1047 
_refine_ls_goodness_of_fit_ref    1.041 
_refine_ls_restrained_S_all       1.041 
_refine_ls_shift/su_max           0.002 
_refine_ls_shift/su_mean          0.000 
 
loop_ 
 _atom_site_label 
 _atom_site_type_symbol 
 _atom_site_fract_x 
 _atom_site_fract_y 
 _atom_site_fract_z 
 _atom_site_U_iso_or_equiv 
 _atom_site_adp_type 
 _atom_site_occupancy 
 _atom_site_site_symmetry_order 
 _atom_site_calc_flag 
 _atom_site_refinement_flags_posn 
 _atom_site_refinement_flags_adp 
 _atom_site_refinement_flags_occupancy 
 _atom_site_disorder_assembly 
 _atom_site_disorder_group 
Si1 Si 0.64443(3) 0.69433(4) 0.71534(2) 0.02041(11) Uani 1 1 d . . . . . 
N1 N 0.73545(11) 0.07020(13) 0.54201(4) 0.0285(3) Uani 1 1 d . . . . . 
N2 N 0.22000(11) 1.31632(13) 0.62117(4) 0.0265(3) Uani 1 1 d . . . . . 
O1 O 0.50053(9) -0.39020(11) 0.53249(4) 0.0326(3) Uani 1 1 d . . . . . 
O2 O 0.87309(10) 0.16416(12) 0.38821(3) 0.0352(3) Uani 1 1 d . . . . . 
O3 O 0.11571(10) 1.43143(11) 0.45328(3) 0.0338(3) Uani 1 1 d . . . . . 
O4 O 0.15693(9) 1.75692(11) 0.71712(3) 0.0277(2) Uani 1 1 d . . . . . 
C1 C 0.81553(15) 0.81632(19) 0.68378(5) 0.0363(4) Uani 1 1 d . . . . . 
H1A H 0.8853 0.8565 0.6894 0.054 Uiso 1 1 calc R U . . . 
H1B H 0.7660 0.8799 0.6699 0.054 Uiso 1 1 calc R U . . . 
H1C H 0.8198 0.7399 0.6659 0.054 Uiso 1 1 calc R U . . . 
C2 C 0.77718(13) 0.77362(16) 0.72465(5) 0.0261(3) Uani 1 1 d . . . . . 
H2A H 0.7697 0.8541 0.7416 0.031 Uiso 1 1 calc R U . . . 
C3 C 0.85778(14) 0.68463(19) 0.74940(6) 0.0372(4) Uani 1 1 d . . . . . 
H3A H 0.9265 0.7282 0.7531 0.056 Uiso 1 1 calc R U . . . 
H3B H 0.8635 0.6023 0.7344 0.056 Uiso 1 1 calc R U . . . 
H3C H 0.8350 0.6664 0.7766 0.056 Uiso 1 1 calc R U . . . 
C4 C 0.58682(17) 0.7507(2) 0.79419(6) 0.0433(5) Uani 1 1 d . . . . . 
H4A H 0.5678 0.7176 0.8206 0.065 Uiso 1 1 calc R U . . . 
H4B H 0.5315 0.8096 0.7817 0.065 Uiso 1 1 calc R U . . . 
H4C H 0.6536 0.7983 0.7990 0.065 Uiso 1 1 calc R U . . . 
C5 C 0.59851(13) 0.63590(16) 0.76485(5) 0.0263(3) Uani 1 1 d . . . . . 
H5A H 0.6544 0.5771 0.7787 0.032 Uiso 1 1 calc R U . . . 
C6 C 0.49731(14) 0.5567(2) 0.75771(6) 0.0396(4) Uani 1 1 d . . . . . 
H6A H 0.4795 0.5231 0.7843 0.059 Uiso 1 1 calc R U . . . 
H6B H 0.5072 0.4833 0.7391 0.059 Uiso 1 1 calc R U . . . 
H6C H 0.4401 0.6126 0.7451 0.059 Uiso 1 1 calc R U . . . 
C7 C 0.65593(13) 0.55422(16) 0.68100(5) 0.0267(3) Uani 1 1 d . . . . . 
C8 C 0.67177(13) 0.46204(15) 0.65923(5) 0.0252(3) Uani 1 1 d . . . . . 
C9 C 0.69017(13) 0.35811(15) 0.63131(5) 0.0244(3) Uani 1 1 d . . . . . 
C10 C 0.77145(13) 0.36838(16) 0.60605(5) 0.0262(3) Uani 1 1 d . . . . . 
H10A H 0.8174 0.4417 0.6091 0.031 Uiso 1 1 calc R U . . . 
C11 C 0.62539(13) 0.24817(16) 0.62652(5) 0.0269(3) Uani 1 1 d . . . . . 
H11A H 0.5702 0.2385 0.6435 0.032 Uiso 1 1 calc R U . . . 
C12 C 0.78622(13) 0.27443(16) 0.57686(5) 0.0261(3) Uani 1 1 d . . . . . 
H12A H 0.8416 0.2842 0.5600 0.031 Uiso 1 1 calc R U . . . 
C13 C 0.63997(13) 0.15307(16) 0.59752(5) 0.0274(3) Uani 1 1 d . . . . . 
H13A H 0.5950 0.0788 0.5949 0.033 Uiso 1 1 calc R U . . . 
C14 C 0.72055(13) 0.16495(15) 0.57180(4) 0.0245(3) Uani 1 1 d . . . . . 
C15 C 0.67771(13) -0.04998(15) 0.54020(5) 0.0265(3) Uani 1 1 d . . . . . 
C16 C 0.69035(15) -0.13759(17) 0.57281(5) 0.0332(4) Uani 1 1 d . . . . . 
H16A H 0.7396 -0.1189 0.5963 0.040 Uiso 1 1 calc R U . . . 
C17 C 0.60842(13) -0.08023(15) 0.50523(5) 0.0258(3) Uani 1 1 d . . . . . 
H17A H 0.6006 -0.0218 0.4823 0.031 Uiso 1 1 calc R U . . . 
C18 C 0.63226(15) -0.25232(17) 0.57175(5) 0.0328(4) Uani 1 1 d . . . . . 
H18A H 0.6404 -0.3110 0.5946 0.039 Uiso 1 1 calc R U . . . 
C19 C 0.55113(13) -0.19453(15) 0.50365(5) 0.0279(3) Uani 1 1 d . . . . . 
H19A H 0.5040 -0.2146 0.4797 0.033 Uiso 1 1 calc R U . . . 
C20 C 0.56193(13) -0.28055(15) 0.53692(5) 0.0267(3) Uani 1 1 d . . . . . 
C21 C 0.52937(14) -0.49369(16) 0.56076(5) 0.0326(4) Uani 1 1 d . . . . . 
H21A H 0.4882 -0.5719 0.5522 0.049 Uiso 1 1 calc R U . . . 
H21B H 0.5152 -0.4678 0.5886 0.049 Uiso 1 1 calc R U . . . 
H21C H 0.6045 -0.5127 0.5610 0.049 Uiso 1 1 calc R U . . . 
C22 C 0.77909(13) 0.10348(15) 0.50465(5) 0.0252(3) Uani 1 1 d . . . . . 
C23 C 0.73995(13) 0.20693(16) 0.47963(5) 0.0284(3) Uani 1 1 d . . . . . 
H23A H 0.6894 0.2647 0.4889 0.034 Uiso 1 1 calc R U . . . 
C24 C 0.85378(13) 0.02162(16) 0.49110(5) 0.0268(3) Uani 1 1 d . . . . . 
H24A H 0.8818 -0.0479 0.5084 0.032 Uiso 1 1 calc R U . . . 
C25 C 0.77458(14) 0.22577(17) 0.44126(5) 0.0300(4) Uani 1 1 d . . . . . 
H25A H 0.7487 0.2974 0.4244 0.036 Uiso 1 1 calc R U . . . 
C26 C 0.88855(13) 0.03963(16) 0.45249(5) 0.0282(3) Uani 1 1 d . . . . . 
H26A H 0.9404 -0.0168 0.4435 0.034 Uiso 1 1 calc R U . . . 
C27 C 0.84710(13) 0.14019(16) 0.42730(5) 0.0276(3) Uani 1 1 d . . . . . 
C28 C 0.94046(16) 0.0727(2) 0.37161(6) 0.0420(5) Uani 1 1 d . . . . . 
H28A H 0.9517 0.0992 0.3435 0.063 Uiso 1 1 calc R U . . . 
H28B H 0.9079 -0.0142 0.3708 0.063 Uiso 1 1 calc R U . . . 
H28C H 1.0082 0.0699 0.3891 0.063 Uiso 1 1 calc R U . . . 
C29 C 0.54995(12) 0.81270(15) 0.69026(5) 0.0249(3) Uani 1 1 d . . . . . 
C30 C 0.49327(12) 0.90153(15) 0.67660(5) 0.0229(3) Uani 1 1 d . . . . . 
C31 C 0.42557(12) 1.00725(15) 0.66183(5) 0.0221(3) Uani 1 1 d . . . . . 
C32 C 0.39454(12) 1.10046(15) 0.68955(5) 0.0247(3) Uani 1 1 d . . . . . 
H32A H 0.4194 1.0931 0.7182 0.030 Uiso 1 1 calc R U . . . 
C33 C 0.38732(12) 1.02147(15) 0.61990(5) 0.0229(3) Uani 1 1 d . . . . . 
H33A H 0.4068 0.9593 0.6004 0.028 Uiso 1 1 calc R U . . . 
C34 C 0.32878(13) 1.20262(15) 0.67625(5) 0.0252(3) Uani 1 1 d . . . . . 
H34A H 0.3090 1.2643 0.6958 0.030 Uiso 1 1 calc R U . . . 
C35 C 0.32185(12) 1.12381(15) 0.60618(5) 0.0234(3) Uani 1 1 d . . . . . 
H35A H 0.2977 1.1313 0.5775 0.028 Uiso 1 1 calc R U . . . 
C36 C 0.29061(12) 1.21675(15) 0.63407(5) 0.0224(3) Uani 1 1 d . . . . . 
C37 C 0.19080(12) 1.34098(15) 0.57762(5) 0.0237(3) Uani 1 1 d . . . . . 
C38 C 0.09421(13) 1.30355(15) 0.55828(5) 0.0271(3) Uani 1 1 d . . . . . 
H38A H 0.0464 1.2586 0.5736 0.032 Uiso 1 1 calc R U . . . 
C39 C 0.25908(14) 1.40885(18) 0.55509(5) 0.0327(4) Uani 1 1 d . . . . . 
H39A H 0.3256 1.4363 0.5684 0.039 Uiso 1 1 calc R U . . . 
C40 C 0.06540(13) 1.33106(16) 0.51622(5) 0.0291(4) Uani 1 1 d . . . . . 
H40A H -0.0013 1.3044 0.5029 0.035 Uiso 1 1 calc R U . . . 
C41 C 0.23198(14) 1.43699(17) 0.51383(5) 0.0324(4) Uani 1 1 d . . . . . 
H41A H 0.2795 1.4834 0.4988 0.039 Uiso 1 1 calc R U . . . 
C42 C 0.13516(13) 1.39740(15) 0.49430(5) 0.0264(3) Uani 1 1 d . . . . . 
C43 C 0.02680(16) 1.37294(19) 0.43023(5) 0.0407(4) Uani 1 1 d . . . . . 
H43D H 0.0261 1.3949 0.4008 0.061 Uiso 1 1 calc R U . . . 
H43E H -0.0376 1.4057 0.4403 0.061 Uiso 1 1 calc R U . . . 
H43F H 0.0305 1.2778 0.4337 0.061 Uiso 1 1 calc R U . . . 
C44 C 0.20881(12) 1.42807(15) 0.64732(4) 0.0243(3) Uani 1 1 d . . . . . 
C45 C 0.11339(13) 1.44980(16) 0.66265(5) 0.0261(3) Uani 1 1 d . . . . . 
H45A H 0.0577 1.3886 0.6571 0.031 Uiso 1 1 calc R U . . . 
C46 C 0.28915(13) 1.51816(16) 0.65590(5) 0.0275(3) Uani 1 1 d . . . . . 
H46A H 0.3551 1.5032 0.6459 0.033 Uiso 1 1 calc R U . . . 
C47 C 0.09892(13) 1.55992(16) 0.68601(5) 0.0269(3) Uani 1 1 d . . . . . 
H47A H 0.0336 1.5734 0.6966 0.032 Uiso 1 1 calc R U . . . 
C48 C 0.27502(12) 1.63007(16) 0.67886(5) 0.0260(3) Uani 1 1 d . . . . . 
H48A H 0.3304 1.6919 0.6841 0.031 Uiso 1 1 calc R U . . . 
C49 C 0.17927(12) 1.65080(15) 0.69400(4) 0.0238(3) Uani 1 1 d . . . . . 
C50 C 0.23589(14) 1.85591(17) 0.72346(6) 0.0345(4) Uani 1 1 d . . . . . 
H50A H 0.2107 1.9270 0.7400 0.052 Uiso 1 1 calc R U . . . 
H50B H 0.2509 1.8902 0.6966 0.052 Uiso 1 1 calc R U . . . 
H50C H 0.3003 1.8185 0.7382 0.052 Uiso 1 1 calc R U . . . 
 
loop_ 
 _atom_site_aniso_label 
 _atom_site_aniso_U_11 
 _atom_site_aniso_U_22 
 _atom_site_aniso_U_33 
 _atom_site_aniso_U_23 
 _atom_site_aniso_U_13 
 _atom_site_aniso_U_12 
Si1 0.0236(2) 0.0206(2) 0.01695(19) -0.00060(15) 0.00192(15) 0.00099(16) 
N1 0.0413(8) 0.0245(7) 0.0213(6) -0.0046(5) 0.0095(6) -0.0055(6) 
N2 0.0319(7) 0.0272(7) 0.0193(6) -0.0019(5) -0.0020(5) 0.0077(6) 
O1 0.0368(7) 0.0208(6) 0.0380(7) 0.0012(5) -0.0044(5) -0.0006(5) 
O2 0.0438(7) 0.0416(7) 0.0218(6) -0.0012(5) 0.0101(5) -0.0032(6) 
O3 0.0459(7) 0.0312(6) 0.0230(6) 0.0048(5) -0.0019(5) -0.0061(5) 
O4 0.0302(6) 0.0262(6) 0.0279(6) -0.0051(4) 0.0080(5) -0.0014(5) 
C1 0.0393(10) 0.0417(10) 0.0294(9) -0.0055(7) 0.0106(7) -0.0130(8) 
C2 0.0289(8) 0.0269(8) 0.0224(8) -0.0039(6) 0.0033(6) -0.0005(7) 
C3 0.0263(9) 0.0421(10) 0.0424(10) 0.0002(8) 0.0005(7) 0.0025(8) 
C4 0.0517(12) 0.0546(12) 0.0254(9) -0.0036(8) 0.0122(8) 0.0078(10) 
C5 0.0259(8) 0.0312(8) 0.0219(8) 0.0060(6) 0.0031(6) 0.0048(7) 
C6 0.0315(10) 0.0507(11) 0.0365(10) 0.0171(8) 0.0029(7) -0.0042(8) 
C7 0.0315(9) 0.0268(8) 0.0214(7) 0.0023(6) 0.0018(6) -0.0018(7) 
C8 0.0328(9) 0.0237(8) 0.0190(7) 0.0004(6) 0.0021(6) -0.0020(7) 
C9 0.0317(8) 0.0234(8) 0.0177(7) -0.0009(6) 0.0011(6) 0.0006(6) 
C10 0.0294(8) 0.0256(8) 0.0234(8) -0.0018(6) 0.0017(6) -0.0046(7) 
C11 0.0324(9) 0.0286(8) 0.0204(7) -0.0011(6) 0.0068(6) -0.0044(7) 
C12 0.0273(8) 0.0292(8) 0.0222(8) -0.0007(6) 0.0046(6) -0.0015(7) 
C13 0.0335(9) 0.0261(8) 0.0231(8) -0.0030(6) 0.0051(6) -0.0082(7) 
C14 0.0310(8) 0.0246(8) 0.0178(7) -0.0017(6) 0.0019(6) 0.0004(6) 
C15 0.0346(9) 0.0237(8) 0.0221(7) -0.0040(6) 0.0071(6) -0.0002(7) 
C16 0.0452(10) 0.0321(9) 0.0211(8) -0.0012(7) -0.0015(7) -0.0072(8) 
C17 0.0313(9) 0.0233(8) 0.0232(8) -0.0006(6) 0.0044(6) 0.0062(7) 
C18 0.0453(10) 0.0289(9) 0.0234(8) 0.0031(7) 0.0009(7) -0.0027(8) 
C19 0.0309(9) 0.0255(8) 0.0260(8) -0.0033(6) -0.0021(6) 0.0051(7) 
C20 0.0307(9) 0.0194(7) 0.0298(8) -0.0039(6) 0.0028(6) 0.0019(6) 
C21 0.0371(10) 0.0259(8) 0.0348(9) 0.0039(7) 0.0036(7) -0.0011(7) 
C22 0.0303(8) 0.0266(8) 0.0188(7) -0.0036(6) 0.0032(6) -0.0041(7) 
C23 0.0303(9) 0.0290(8) 0.0267(8) -0.0024(6) 0.0058(6) 0.0033(7) 
C24 0.0308(8) 0.0255(8) 0.0232(8) -0.0020(6) -0.0004(6) 0.0012(7) 
C25 0.0355(9) 0.0290(8) 0.0252(8) 0.0023(7) 0.0025(7) 0.0022(7) 
C26 0.0279(8) 0.0303(8) 0.0270(8) -0.0074(7) 0.0050(6) -0.0004(7) 
C27 0.0315(9) 0.0320(9) 0.0196(7) -0.0036(6) 0.0043(6) -0.0066(7) 
C28 0.0491(11) 0.0501(11) 0.0295(9) -0.0078(8) 0.0164(8) -0.0036(9) 
C29 0.0279(8) 0.0267(8) 0.0198(7) -0.0004(6) 0.0020(6) -0.0031(7) 
C30 0.0245(8) 0.0239(8) 0.0200(7) 0.0013(6) 0.0014(6) -0.0037(6) 
C31 0.0217(7) 0.0215(7) 0.0228(7) 0.0032(6) 0.0018(6) -0.0032(6) 
C32 0.0275(8) 0.0269(8) 0.0188(7) 0.0021(6) -0.0007(6) -0.0029(6) 
C33 0.0229(8) 0.0232(7) 0.0224(7) -0.0014(6) 0.0018(6) -0.0009(6) 
C34 0.0305(8) 0.0255(8) 0.0194(7) -0.0012(6) 0.0013(6) 0.0015(6) 
C35 0.0242(8) 0.0272(8) 0.0182(7) -0.0007(6) -0.0004(6) -0.0016(6) 
C36 0.0215(7) 0.0240(8) 0.0213(7) 0.0010(6) -0.0002(6) -0.0011(6) 
C37 0.0283(8) 0.0224(7) 0.0198(7) -0.0004(6) 0.0007(6) 0.0049(6) 
C38 0.0292(8) 0.0254(8) 0.0263(8) 0.0021(6) 0.0018(6) -0.0023(7) 
C39 0.0289(9) 0.0403(10) 0.0285(9) -0.0029(7) 0.0011(7) -0.0045(7) 
C40 0.0291(9) 0.0260(8) 0.0299(8) 0.0013(7) -0.0055(7) -0.0036(7) 
C41 0.0333(9) 0.0349(9) 0.0299(9) -0.0003(7) 0.0076(7) -0.0062(7) 
C42 0.0364(9) 0.0208(7) 0.0215(8) 0.0001(6) 0.0016(6) 0.0021(7) 
C43 0.0543(12) 0.0389(10) 0.0256(9) 0.0034(7) -0.0091(8) -0.0106(9) 
C44 0.0291(8) 0.0255(8) 0.0174(7) 0.0002(6) -0.0010(6) 0.0042(6) 
C45 0.0292(8) 0.0281(8) 0.0212(7) 0.0003(6) 0.0040(6) -0.0048(7) 
C46 0.0235(8) 0.0337(9) 0.0255(8) -0.0012(7) 0.0028(6) 0.0048(7) 
C47 0.0269(8) 0.0324(9) 0.0223(7) -0.0005(6) 0.0072(6) -0.0006(7) 
C48 0.0240(8) 0.0290(8) 0.0245(8) -0.0005(6) 0.0007(6) -0.0019(6) 
C49 0.0292(8) 0.0242(8) 0.0178(7) 0.0008(6) 0.0022(6) 0.0028(6) 
C50 0.0352(10) 0.0283(9) 0.0404(10) -0.0088(7) 0.0055(7) -0.0040(7) 
 
_geom_special_details 
; 
 All esds (except the esd in the dihedral angle between two l.s. planes) 
 are estimated using the full covariance matrix.  The cell esds are taken 
 into account individually in the estimation of esds in distances, angles 
 and torsion angles; correlations between esds in cell parameters are only 
 used when they are defined by crystal symmetry.  An approximate (isotropic) 
 treatment of cell esds is used for estimating esds involving l.s. planes. 
; 
 
loop_ 
 _geom_bond_atom_site_label_1 
 _geom_bond_atom_site_label_2 
 _geom_bond_distance 
 _geom_bond_site_symmetry_2 
 _geom_bond_publ_flag 
Si1 C7 1.8324(17) . ? 
Si1 C29 1.8331(16) . ? 
Si1 C5 1.8727(16) . ? 
Si1 C2 1.8738(17) . ? 
N1 C14 1.398(2) . ? 
N1 C15 1.432(2) . ? 
N1 C22 1.434(2) . ? 
N2 C36 1.393(2) . ? 
N2 C44 1.441(2) . ? 
N2 C37 1.4426(19) . ? 
O1 C20 1.367(2) . ? 
O1 C21 1.421(2) . ? 
O2 C27 1.3715(19) . ? 
O2 C28 1.420(2) . ? 
O3 C42 1.3717(19) . ? 
O3 C43 1.419(2) . ? 
O4 C49 1.3690(19) . ? 
O4 C50 1.428(2) . ? 
C1 C2 1.531(2) . ? 
C1 H1A 0.9800 . ? 
C1 H1B 0.9800 . ? 
C1 H1C 0.9800 . ? 
C2 C3 1.531(2) . ? 
C2 H2A 1.0000 . ? 
C3 H3A 0.9800 . ? 
C3 H3B 0.9800 . ? 
C3 H3C 0.9800 . ? 
C4 C5 1.530(2) . ? 
C4 H4A 0.9800 . ? 
C4 H4B 0.9800 . ? 
C4 H4C 0.9800 . ? 
C5 C6 1.522(2) . ? 
C5 H5A 1.0000 . ? 
C6 H6A 0.9800 . ? 
C6 H6B 0.9800 . ? 
C6 H6C 0.9800 . ? 
C7 C8 1.210(2) . ? 
C8 C9 1.434(2) . ? 
C9 C11 1.395(2) . ? 
C9 C10 1.401(2) . ? 
C10 C12 1.378(2) . ? 
C10 H10A 0.9500 . ? 
C11 C13 1.382(2) . ? 
C11 H11A 0.9500 . ? 
C12 C14 1.398(2) . ? 
C12 H12A 0.9500 . ? 
C13 C14 1.405(2) . ? 
C13 H13A 0.9500 . ? 
C15 C16 1.382(2) . ? 
C15 C17 1.392(2) . ? 
C16 C18 1.387(2) . ? 
C16 H16A 0.9500 . ? 
C17 C19 1.377(2) . ? 
C17 H17A 0.9500 . ? 
C18 C20 1.391(2) . ? 
C18 H18A 0.9500 . ? 
C19 C20 1.388(2) . ? 
C19 H19A 0.9500 . ? 
C21 H21A 0.9800 . ? 
C21 H21B 0.9800 . ? 
C21 H21C 0.9800 . ? 
C22 C24 1.380(2) . ? 
C22 C23 1.392(2) . ? 
C23 C25 1.384(2) . ? 
C23 H23A 0.9500 . ? 
C24 C26 1.391(2) . ? 
C24 H24A 0.9500 . ? 
C25 C27 1.389(2) . ? 
C25 H25A 0.9500 . ? 
C26 C27 1.381(2) . ? 
C26 H26A 0.9500 . ? 
C28 H28A 0.9800 . ? 
C28 H28B 0.9800 . ? 
C28 H28C 0.9800 . ? 
C29 C30 1.214(2) . ? 
C30 C31 1.433(2) . ? 
C31 C33 1.400(2) . ? 
C31 C32 1.400(2) . ? 
C32 C34 1.379(2) . ? 
C32 H32A 0.9500 . ? 
C33 C35 1.381(2) . ? 
C33 H33A 0.9500 . ? 
C34 C36 1.407(2) . ? 
C34 H34A 0.9500 . ? 
C35 C36 1.403(2) . ? 
C35 H35A 0.9500 . ? 
C37 C38 1.373(2) . ? 
C37 C39 1.389(2) . ? 
C38 C40 1.402(2) . ? 
C38 H38A 0.9500 . ? 
C39 C41 1.375(2) . ? 
C39 H39A 0.9500 . ? 
C40 C42 1.382(2) . ? 
C40 H40A 0.9500 . ? 
C41 C42 1.384(2) . ? 
C41 H41A 0.9500 . ? 
C43 H43D 0.9800 . ? 
C43 H43E 0.9800 . ? 
C43 H43F 0.9800 . ? 
C44 C46 1.384(2) . ? 
C44 C45 1.388(2) . ? 
C45 C47 1.382(2) . ? 
C45 H45A 0.9500 . ? 
C46 C48 1.389(2) . ? 
C46 H46A 0.9500 . ? 
C47 C49 1.387(2) . ? 
C47 H47A 0.9500 . ? 
C48 C49 1.388(2) . ? 
C48 H48A 0.9500 . ? 
C50 H50A 0.9800 . ? 
C50 H50B 0.9800 . ? 
C50 H50C 0.9800 . ? 
 
loop_ 
 _geom_angle_atom_site_label_1 
 _geom_angle_atom_site_label_2 
 _geom_angle_atom_site_label_3 
 _geom_angle 
 _geom_angle_site_symmetry_1 
 _geom_angle_site_symmetry_3 
 _geom_angle_publ_flag 
C7 Si1 C29 109.96(7) . . ? 
C7 Si1 C5 109.18(7) . . ? 
C29 Si1 C5 109.64(7) . . ? 
C7 Si1 C2 107.54(7) . . ? 
C29 Si1 C2 108.89(7) . . ? 
C5 Si1 C2 111.61(7) . . ? 
C14 N1 C15 120.83(13) . . ? 
C14 N1 C22 121.24(13) . . ? 
C15 N1 C22 114.75(12) . . ? 
C36 N2 C44 120.52(12) . . ? 
C36 N2 C37 120.52(12) . . ? 
C44 N2 C37 114.03(12) . . ? 
C20 O1 C21 116.13(13) . . ? 
C27 O2 C28 117.20(14) . . ? 
C42 O3 C43 116.69(13) . . ? 
C49 O4 C50 116.89(12) . . ? 
C2 C1 H1A 109.5 . . ? 
C2 C1 H1B 109.5 . . ? 
H1A C1 H1B 109.5 . . ? 
C2 C1 H1C 109.5 . . ? 
H1A C1 H1C 109.5 . . ? 
H1B C1 H1C 109.5 . . ? 
C3 C2 C1 111.15(14) . . ? 
C3 C2 Si1 111.67(12) . . ? 
C1 C2 Si1 111.04(11) . . ? 
C3 C2 H2A 107.6 . . ? 
C1 C2 H2A 107.6 . . ? 
Si1 C2 H2A 107.6 . . ? 
C2 C3 H3A 109.5 . . ? 
C2 C3 H3B 109.5 . . ? 
H3A C3 H3B 109.5 . . ? 
C2 C3 H3C 109.5 . . ? 
H3A C3 H3C 109.5 . . ? 
H3B C3 H3C 109.5 . . ? 
C5 C4 H4A 109.5 . . ? 
C5 C4 H4B 109.5 . . ? 
H4A C4 H4B 109.5 . . ? 
C5 C4 H4C 109.5 . . ? 
H4A C4 H4C 109.5 . . ? 
H4B C4 H4C 109.5 . . ? 
C6 C5 C4 111.11(15) . . ? 
C6 C5 Si1 112.66(11) . . ? 
C4 C5 Si1 110.68(12) . . ? 
C6 C5 H5A 107.4 . . ? 
C4 C5 H5A 107.4 . . ? 
Si1 C5 H5A 107.4 . . ? 
C5 C6 H6A 109.5 . . ? 
C5 C6 H6B 109.5 . . ? 
H6A C6 H6B 109.5 . . ? 
C5 C6 H6C 109.5 . . ? 
H6A C6 H6C 109.5 . . ? 
H6B C6 H6C 109.5 . . ? 
C8 C7 Si1 174.97(15) . . ? 
C7 C8 C9 176.51(16) . . ? 
C11 C9 C10 117.82(14) . . ? 
C11 C9 C8 121.94(14) . . ? 
C10 C9 C8 120.14(14) . . ? 
C12 C10 C9 121.39(15) . . ? 
C12 C10 H10A 119.3 . . ? 
C9 C10 H10A 119.3 . . ? 
C13 C11 C9 121.20(15) . . ? 
C13 C11 H11A 119.4 . . ? 
C9 C11 H11A 119.4 . . ? 
C10 C12 C14 120.73(15) . . ? 
C10 C12 H12A 119.6 . . ? 
C14 C12 H12A 119.6 . . ? 
C11 C13 C14 120.73(15) . . ? 
C11 C13 H13A 119.6 . . ? 
C14 C13 H13A 119.6 . . ? 
C12 C14 N1 120.56(14) . . ? 
C12 C14 C13 118.12(14) . . ? 
N1 C14 C13 121.32(14) . . ? 
C16 C15 C17 119.20(15) . . ? 
C16 C15 N1 120.76(15) . . ? 
C17 C15 N1 120.04(14) . . ? 
C15 C16 C18 120.99(16) . . ? 
C15 C16 H16A 119.5 . . ? 
C18 C16 H16A 119.5 . . ? 
C19 C17 C15 120.28(15) . . ? 
C19 C17 H17A 119.9 . . ? 
C15 C17 H17A 119.9 . . ? 
C16 C18 C20 119.29(15) . . ? 
C16 C18 H18A 120.4 . . ? 
C20 C18 H18A 120.4 . . ? 
C17 C19 C20 120.32(15) . . ? 
C17 C19 H19A 119.8 . . ? 
C20 C19 H19A 119.8 . . ? 
O1 C20 C19 115.74(14) . . ? 
O1 C20 C18 124.39(15) . . ? 
C19 C20 C18 119.87(15) . . ? 
O1 C21 H21A 109.5 . . ? 
O1 C21 H21B 109.5 . . ? 
H21A C21 H21B 109.5 . . ? 
O1 C21 H21C 109.5 . . ? 
H21A C21 H21C 109.5 . . ? 
H21B C21 H21C 109.5 . . ? 
C24 C22 C23 119.35(15) . . ? 
C24 C22 N1 118.53(14) . . ? 
C23 C22 N1 121.72(15) . . ? 
C25 C23 C22 120.07(15) . . ? 
C25 C23 H23A 120.0 . . ? 
C22 C23 H23A 120.0 . . ? 
C22 C24 C26 120.86(15) . . ? 
C22 C24 H24A 119.6 . . ? 
C26 C24 H24A 119.6 . . ? 
C23 C25 C27 120.13(15) . . ? 
C23 C25 H25A 119.9 . . ? 
C27 C25 H25A 119.9 . . ? 
C27 C26 C24 119.47(15) . . ? 
C27 C26 H26A 120.3 . . ? 
C24 C26 H26A 120.3 . . ? 
O2 C27 C26 124.33(15) . . ? 
O2 C27 C25 115.63(15) . . ? 
C26 C27 C25 120.04(15) . . ? 
O2 C28 H28A 109.5 . . ? 
O2 C28 H28B 109.5 . . ? 
H28A C28 H28B 109.5 . . ? 
O2 C28 H28C 109.5 . . ? 
H28A C28 H28C 109.5 . . ? 
H28B C28 H28C 109.5 . . ? 
C30 C29 Si1 172.60(14) . . ? 
C29 C30 C31 178.11(16) . . ? 
C33 C31 C32 117.50(14) . . ? 
C33 C31 C30 122.23(14) . . ? 
C32 C31 C30 120.26(14) . . ? 
C34 C32 C31 121.51(14) . . ? 
C34 C32 H32A 119.2 . . ? 
C31 C32 H32A 119.2 . . ? 
C35 C33 C31 121.50(14) . . ? 
C35 C33 H33A 119.2 . . ? 
C31 C33 H33A 119.2 . . ? 
C32 C34 C36 120.84(14) . . ? 
C32 C34 H34A 119.6 . . ? 
C36 C34 H34A 119.6 . . ? 
C33 C35 C36 120.83(14) . . ? 
C33 C35 H35A 119.6 . . ? 
C36 C35 H35A 119.6 . . ? 
N2 C36 C35 121.63(13) . . ? 
N2 C36 C34 120.48(14) . . ? 
C35 C36 C34 117.81(14) . . ? 
C38 C37 C39 119.04(15) . . ? 
C38 C37 N2 121.08(14) . . ? 
C39 C37 N2 119.81(14) . . ? 
C37 C38 C40 120.69(15) . . ? 
C37 C38 H38A 119.7 . . ? 
C40 C38 H38A 119.7 . . ? 
C41 C39 C37 121.04(16) . . ? 
C41 C39 H39A 119.5 . . ? 
C37 C39 H39A 119.5 . . ? 
C42 C40 C38 119.24(15) . . ? 
C42 C40 H40A 120.4 . . ? 
C38 C40 H40A 120.4 . . ? 
C39 C41 C42 119.72(16) . . ? 
C39 C41 H41A 120.1 . . ? 
C42 C41 H41A 120.1 . . ? 
O3 C42 C40 124.75(15) . . ? 
O3 C42 C41 114.97(14) . . ? 
C40 C42 C41 120.26(15) . . ? 
O3 C43 H43D 109.5 . . ? 
O3 C43 H43E 109.5 . . ? 
H43D C43 H43E 109.5 . . ? 
O3 C43 H43F 109.5 . . ? 
H43D C43 H43F 109.5 . . ? 
H43E C43 H43F 109.5 . . ? 
C46 C44 C45 118.95(14) . . ? 
C46 C44 N2 121.63(14) . . ? 
C45 C44 N2 119.35(14) . . ? 
C47 C45 C44 120.43(15) . . ? 
C47 C45 H45A 119.8 . . ? 
C44 C45 H45A 119.8 . . ? 
C44 C46 C48 121.11(15) . . ? 
C44 C46 H46A 119.4 . . ? 
C48 C46 H46A 119.4 . . ? 
C45 C47 C49 120.34(15) . . ? 
C45 C47 H47A 119.8 . . ? 
C49 C47 H47A 119.8 . . ? 
C49 C48 C46 119.42(15) . . ? 
C49 C48 H48A 120.3 . . ? 
C46 C48 H48A 120.3 . . ? 
O4 C49 C47 115.89(14) . . ? 
O4 C49 C48 124.37(14) . . ? 
C47 C49 C48 119.74(14) . . ? 
O4 C50 H50A 109.5 . . ? 
O4 C50 H50B 109.5 . . ? 
H50A C50 H50B 109.5 . . ? 
O4 C50 H50C 109.5 . . ? 
H50A C50 H50C 109.5 . . ? 
H50B C50 H50C 109.5 . . ? 
 
loop_ 
 _geom_torsion_atom_site_label_1 
 _geom_torsion_atom_site_label_2 
 _geom_torsion_atom_site_label_3 
 _geom_torsion_atom_site_label_4 
 _geom_torsion 
 _geom_torsion_site_symmetry_1 
 _geom_torsion_site_symmetry_2 
 _geom_torsion_site_symmetry_3 
 _geom_torsion_site_symmetry_4 
 _geom_torsion_publ_flag 
C7 Si1 C2 C3 -66.50(13) . . . . ? 
C29 Si1 C2 C3 174.39(11) . . . . ? 
C5 Si1 C2 C3 53.22(13) . . . . ? 
C7 Si1 C2 C1 58.17(13) . . . . ? 
C29 Si1 C2 C1 -60.94(13) . . . . ? 
C5 Si1 C2 C1 177.89(12) . . . . ? 
C7 Si1 C5 C6 -54.30(14) . . . . ? 
C29 Si1 C5 C6 66.22(14) . . . . ? 
C2 Si1 C5 C6 -173.04(12) . . . . ? 
C7 Si1 C5 C4 -179.39(12) . . . . ? 
C29 Si1 C5 C4 -58.87(14) . . . . ? 
C2 Si1 C5 C4 61.87(14) . . . . ? 
C11 C9 C10 C12 1.1(2) . . . . ? 
C8 C9 C10 C12 -175.33(15) . . . . ? 
C10 C9 C11 C13 -0.7(2) . . . . ? 
C8 C9 C11 C13 175.66(15) . . . . ? 
C9 C10 C12 C14 -0.5(2) . . . . ? 
C9 C11 C13 C14 -0.3(3) . . . . ? 
C10 C12 C14 N1 179.67(15) . . . . ? 
C10 C12 C14 C13 -0.6(2) . . . . ? 
C15 N1 C14 C12 171.86(15) . . . . ? 
C22 N1 C14 C12 -29.3(2) . . . . ? 
C15 N1 C14 C13 -7.9(2) . . . . ? 
C22 N1 C14 C13 150.91(16) . . . . ? 
C11 C13 C14 C12 1.0(2) . . . . ? 
C11 C13 C14 N1 -179.27(15) . . . . ? 
C14 N1 C15 C16 -63.5(2) . . . . ? 
C22 N1 C15 C16 136.44(16) . . . . ? 
C14 N1 C15 C17 116.99(17) . . . . ? 
C22 N1 C15 C17 -43.1(2) . . . . ? 
C17 C15 C16 C18 -2.4(3) . . . . ? 
N1 C15 C16 C18 178.02(16) . . . . ? 
C16 C15 C17 C19 1.7(2) . . . . ? 
N1 C15 C17 C19 -178.73(14) . . . . ? 
C15 C16 C18 C20 1.4(3) . . . . ? 
C15 C17 C19 C20 0.0(2) . . . . ? 
C21 O1 C20 C19 164.30(15) . . . . ? 
C21 O1 C20 C18 -15.5(2) . . . . ? 
C17 C19 C20 O1 179.12(14) . . . . ? 
C17 C19 C20 C18 -1.1(2) . . . . ? 
C16 C18 C20 O1 -179.83(16) . . . . ? 
C16 C18 C20 C19 0.4(3) . . . . ? 
C14 N1 C22 C24 136.91(16) . . . . ? 
C15 N1 C22 C24 -63.1(2) . . . . ? 
C14 N1 C22 C23 -50.3(2) . . . . ? 
C15 N1 C22 C23 109.68(17) . . . . ? 
C24 C22 C23 C25 1.1(2) . . . . ? 
N1 C22 C23 C25 -171.64(15) . . . . ? 
C23 C22 C24 C26 -1.4(2) . . . . ? 
N1 C22 C24 C26 171.55(15) . . . . ? 
C22 C23 C25 C27 1.1(3) . . . . ? 
C22 C24 C26 C27 -0.5(2) . . . . ? 
C28 O2 C27 C26 5.4(2) . . . . ? 
C28 O2 C27 C25 -175.10(15) . . . . ? 
C24 C26 C27 O2 -177.77(15) . . . . ? 
C24 C26 C27 C25 2.7(2) . . . . ? 
C23 C25 C27 O2 177.41(15) . . . . ? 
C23 C25 C27 C26 -3.0(3) . . . . ? 
C33 C31 C32 C34 0.0(2) . . . . ? 
C30 C31 C32 C34 -179.47(15) . . . . ? 
C32 C31 C33 C35 0.3(2) . . . . ? 
C30 C31 C33 C35 179.81(14) . . . . ? 
C31 C32 C34 C36 -0.1(2) . . . . ? 
C31 C33 C35 C36 -0.6(2) . . . . ? 
C44 N2 C36 C35 -164.56(15) . . . . ? 
C37 N2 C36 C35 -10.9(2) . . . . ? 
C44 N2 C36 C34 18.7(2) . . . . ? 
C37 N2 C36 C34 172.37(14) . . . . ? 
C33 C35 C36 N2 -176.34(14) . . . . ? 
C33 C35 C36 C34 0.5(2) . . . . ? 
C32 C34 C36 N2 176.73(14) . . . . ? 
C32 C34 C36 C35 -0.1(2) . . . . ? 
C36 N2 C37 C38 104.82(18) . . . . ? 
C44 N2 C37 C38 -99.92(17) . . . . ? 
C36 N2 C37 C39 -78.1(2) . . . . ? 
C44 N2 C37 C39 77.13(19) . . . . ? 
C39 C37 C38 C40 1.2(2) . . . . ? 
N2 C37 C38 C40 178.27(14) . . . . ? 
C38 C37 C39 C41 -1.0(3) . . . . ? 
N2 C37 C39 C41 -178.12(15) . . . . ? 
C37 C38 C40 C42 -0.5(2) . . . . ? 
C37 C39 C41 C42 0.1(3) . . . . ? 
C43 O3 C42 C40 -12.5(2) . . . . ? 
C43 O3 C42 C41 168.82(16) . . . . ? 
C38 C40 C42 O3 -179.14(15) . . . . ? 
C38 C40 C42 C41 -0.5(2) . . . . ? 
C39 C41 C42 O3 179.45(15) . . . . ? 
C39 C41 C42 C40 0.7(3) . . . . ? 
C36 N2 C44 C46 67.6(2) . . . . ? 
C37 N2 C44 C46 -87.71(18) . . . . ? 
C36 N2 C44 C45 -115.74(17) . . . . ? 
C37 N2 C44 C45 89.00(17) . . . . ? 
C46 C44 C45 C47 0.2(2) . . . . ? 
N2 C44 C45 C47 -176.61(14) . . . . ? 
C45 C44 C46 C48 -1.1(2) . . . . ? 
N2 C44 C46 C48 175.64(14) . . . . ? 
C44 C45 C47 C49 0.7(2) . . . . ? 
C44 C46 C48 C49 1.0(2) . . . . ? 
C50 O4 C49 C47 -176.03(14) . . . . ? 
C50 O4 C49 C48 4.3(2) . . . . ? 
C45 C47 C49 O4 179.51(14) . . . . ? 
C45 C47 C49 C48 -0.8(2) . . . . ? 
C46 C48 C49 O4 179.59(14) . . . . ? 
C46 C48 C49 C47 -0.1(2) . . . . ? 
 
_refine_diff_density_max    0.329 
_refine_diff_density_min   -0.284 
_refine_diff_density_rms    0.041 
 
_shelx_res_file 
; 
 
    x15357.res created by SHELXL-2014/7 
 
TITL x15357 : space group P21/n 
CELL  1.54178  12.7873  10.2281  32.4829   90.000   96.682   90.000 
ZERR    4.000   0.0003   0.0002   0.0007    0.000    0.001    0.000 
LATT  1 
SYMM 1/2-X, 1/2+Y, 1/2-Z 
SFAC C H N O SI 
UNIT 200 200 8 16 4 
TEMP -183 
L.S. 10 
SIZE 0.35 0.30 0.28 
REM COLR orange 
REM FORM irregular block 
BOND $H 
LIST 4 
CONF 
ACTA 
FMAP 2 
PLAN 5 
WGHT    0.044800    2.765800 
FVAR       0.12449 
SI1   5    0.644433    0.694332    0.715344    11.00000    0.02362    0.02056 = 
         0.01695   -0.00060    0.00192    0.00099 
N1    3    0.735445    0.070196    0.542011    11.00000    0.04126    0.02450 = 
         0.02127   -0.00458    0.00948   -0.00550 
N2    3    0.220003    1.316317    0.621169    11.00000    0.03193    0.02720 = 
         0.01930   -0.00192   -0.00195    0.00769 
O1    4    0.500531   -0.390199    0.532494    11.00000    0.03680    0.02085 = 
         0.03798    0.00117   -0.00435   -0.00061 
O2    4    0.873087    0.164155    0.388210    11.00000    0.04376    0.04164 = 
         0.02180   -0.00119    0.01009   -0.00322 
O3    4    0.115709    1.431427    0.453277    11.00000    0.04590    0.03123 = 
         0.02298    0.00479   -0.00189   -0.00614 
O4    4    0.156935    1.756924    0.717124    11.00000    0.03019    0.02621 = 
         0.02791   -0.00511    0.00802   -0.00138 
C1    1    0.815534    0.816323    0.683777    11.00000    0.03927    0.04173 = 
         0.02940   -0.00547    0.01060   -0.01303 
AFIX 137 
H1A   2    0.885294    0.856520    0.689437    11.00000   -1.50000 
H1B   2    0.766020    0.879869    0.669888    11.00000   -1.50000 
H1C   2    0.819830    0.739904    0.665853    11.00000   -1.50000 
AFIX   0 
C2    1    0.777183    0.773620    0.724650    11.00000    0.02894    0.02693 = 
         0.02237   -0.00388    0.00327   -0.00049 
AFIX  13 
H2A   2    0.769722    0.854065    0.741559    11.00000   -1.20000 
AFIX   0 
C3    1    0.857780    0.684634    0.749397    11.00000    0.02633    0.04210 = 
         0.04243    0.00019    0.00046    0.00251 
AFIX 137 
H3A   2    0.926511    0.728154    0.753074    11.00000   -1.50000 
H3B   2    0.863466    0.602348    0.734362    11.00000   -1.50000 
H3C   2    0.834955    0.666440    0.776596    11.00000   -1.50000 
AFIX   0 
C4    1    0.586817    0.750654    0.794188    11.00000    0.05169    0.05465 = 
         0.02541   -0.00360    0.01216    0.00776 
AFIX 137 
H4A   2    0.567804    0.717560    0.820636    11.00000   -1.50000 
H4B   2    0.531526    0.809619    0.781749    11.00000   -1.50000 
H4C   2    0.653630    0.798273    0.798970    11.00000   -1.50000 
AFIX   0 
C5    1    0.598514    0.635903    0.764845    11.00000    0.02588    0.03121 = 
         0.02192    0.00601    0.00315    0.00479 
AFIX  13 
H5A   2    0.654402    0.577052    0.778669    11.00000   -1.20000 
AFIX   0 
C6    1    0.497309    0.556684    0.757715    11.00000    0.03149    0.05073 = 
         0.03646    0.01708    0.00293   -0.00418 
AFIX 137 
H6A   2    0.479501    0.523089    0.784282    11.00000   -1.50000 
H6B   2    0.507167    0.483331    0.739144    11.00000   -1.50000 
H6C   2    0.440075    0.612611    0.745126    11.00000   -1.50000 
AFIX   0 
C7    1    0.655927    0.554217    0.681004    11.00000    0.03145    0.02682 = 
         0.02138    0.00234    0.00178   -0.00180 
C8    1    0.671768    0.462038    0.659230    11.00000    0.03276    0.02371 = 
         0.01901    0.00038    0.00214   -0.00197 
C9    1    0.690168    0.358108    0.631307    11.00000    0.03175    0.02340 = 
         0.01769   -0.00089    0.00109    0.00058 
C10   1    0.771454    0.368382    0.606047    11.00000    0.02937    0.02557 = 
         0.02339   -0.00183    0.00168   -0.00463 
AFIX  43 
H10A  2    0.817357    0.441656    0.609102    11.00000   -1.20000 
AFIX   0 
C11   1    0.625386    0.248167    0.626519    11.00000    0.03244    0.02860 = 
         0.02039   -0.00108    0.00679   -0.00445 
AFIX  43 
H11A  2    0.570218    0.238484    0.643506    11.00000   -1.20000 
AFIX   0 
C12   1    0.786223    0.274428    0.576860    11.00000    0.02732    0.02924 = 
         0.02215   -0.00066    0.00463   -0.00150 
AFIX  43 
H12A  2    0.841645    0.284180    0.559999    11.00000   -1.20000 
AFIX   0 
C13   1    0.639975    0.153069    0.597521    11.00000    0.03355    0.02613 = 
         0.02311   -0.00298    0.00515   -0.00824 
AFIX  43 
H13A  2    0.595040    0.078833    0.594943    11.00000   -1.20000 
AFIX   0 
C14   1    0.720555    0.164950    0.571796    11.00000    0.03104    0.02455 = 
         0.01776   -0.00172    0.00186    0.00044 
C15   1    0.677709   -0.049985    0.540203    11.00000    0.03465    0.02366 = 
         0.02206   -0.00396    0.00708   -0.00020 
C16   1    0.690351   -0.137594    0.572806    11.00000    0.04520    0.03207 = 
         0.02113   -0.00116   -0.00146   -0.00722 
AFIX  43 
H16A  2    0.739567   -0.118948    0.596287    11.00000   -1.20000 
AFIX   0 
C17   1    0.608416   -0.080233    0.505225    11.00000    0.03126    0.02332 = 
         0.02316   -0.00062    0.00442    0.00619 
AFIX  43 
H17A  2    0.600600   -0.021797    0.482341    11.00000   -1.20000 
AFIX   0 
C18   1    0.632261   -0.252317    0.571753    11.00000    0.04530    0.02887 = 
         0.02344    0.00308    0.00087   -0.00270 
AFIX  43 
H18A  2    0.640409   -0.310988    0.594574    11.00000   -1.20000 
AFIX   0 
C19   1    0.551128   -0.194534    0.503652    11.00000    0.03094    0.02552 = 
         0.02597   -0.00332   -0.00212    0.00515 
AFIX  43 
H19A  2    0.503993   -0.214584    0.479679    11.00000   -1.20000 
AFIX   0 
C20   1    0.561934   -0.280546    0.536918    11.00000    0.03068    0.01941 = 
         0.02983   -0.00388    0.00276    0.00189 
C21   1    0.529370   -0.493693    0.560756    11.00000    0.03705    0.02588 = 
         0.03478    0.00394    0.00356   -0.00111 
AFIX 137 
H21A  2    0.488229   -0.571894    0.552154    11.00000   -1.50000 
H21B  2    0.515223   -0.467791    0.588623    11.00000   -1.50000 
H21C  2    0.604541   -0.512745    0.560977    11.00000   -1.50000 
AFIX   0 
C22   1    0.779093    0.103478    0.504654    11.00000    0.03029    0.02663 = 
         0.01880   -0.00358    0.00324   -0.00411 
C23   1    0.739955    0.206928    0.479625    11.00000    0.03030    0.02898 = 
         0.02666   -0.00237    0.00578    0.00329 
AFIX  43 
H23A  2    0.689405    0.264676    0.488888    11.00000   -1.20000 
AFIX   0 
C24   1    0.853781    0.021616    0.491104    11.00000    0.03081    0.02553 = 
         0.02321   -0.00196   -0.00043    0.00117 
AFIX  43 
H24A  2    0.881807   -0.047941    0.508375    11.00000   -1.20000 
AFIX   0 
C25   1    0.774579    0.225775    0.441265    11.00000    0.03550    0.02904 = 
         0.02518    0.00226    0.00247    0.00219 
AFIX  43 
H25A  2    0.748706    0.297384    0.424440    11.00000   -1.20000 
AFIX   0 
C26   1    0.888552    0.039628    0.452493    11.00000    0.02788    0.03032 = 
         0.02696   -0.00739    0.00497   -0.00042 
AFIX  43 
H26A  2    0.940398   -0.016792    0.443518    11.00000   -1.20000 
AFIX   0 
C27   1    0.847104    0.140193    0.427301    11.00000    0.03146    0.03205 = 
         0.01961   -0.00356    0.00431   -0.00657 
C28   1    0.940463    0.072710    0.371607    11.00000    0.04912    0.05008 = 
         0.02950   -0.00779    0.01640   -0.00365 
AFIX 137 
H28A  2    0.951722    0.099242    0.343469    11.00000   -1.50000 
H28B  2    0.907943   -0.014154    0.370777    11.00000   -1.50000 
H28C  2    1.008227    0.069926    0.389114    11.00000   -1.50000 
AFIX   0 
C29   1    0.549951    0.812703    0.690261    11.00000    0.02792    0.02673 = 
         0.01982   -0.00041    0.00202   -0.00314 
C30   1    0.493265    0.901528    0.676598    11.00000    0.02446    0.02386 = 
         0.02004    0.00128    0.00143   -0.00373 
C31   1    0.425569    1.007253    0.661826    11.00000    0.02168    0.02150 = 
         0.02279    0.00318    0.00176   -0.00323 
C32   1    0.394538    1.100458    0.689548    11.00000    0.02750    0.02688 = 
         0.01883    0.00213   -0.00069   -0.00288 
AFIX  43 
H32A  2    0.419362    1.093139    0.718177    11.00000   -1.20000 
AFIX   0 
C33   1    0.387322    1.021470    0.619904    11.00000    0.02292    0.02324 = 
         0.02244   -0.00144    0.00177   -0.00091 
AFIX  43 
H33A  2    0.406833    0.959321    0.600446    11.00000   -1.20000 
AFIX   0 
C34   1    0.328780    1.202622    0.676250    11.00000    0.03047    0.02547 = 
         0.01937   -0.00119    0.00132    0.00148 
AFIX  43 
H34A  2    0.308986    1.264259    0.695807    11.00000   -1.20000 
AFIX   0 
C35   1    0.321855    1.123807    0.606185    11.00000    0.02419    0.02720 = 
         0.01821   -0.00069   -0.00035   -0.00156 
AFIX  43 
H35A  2    0.297684    1.131347    0.577502    11.00000   -1.20000 
AFIX   0 
C36   1    0.290612    1.216746    0.634075    11.00000    0.02146    0.02398 = 
         0.02127    0.00103   -0.00017   -0.00113 
C37   1    0.190795    1.340982    0.577622    11.00000    0.02832    0.02235 = 
         0.01983   -0.00043    0.00069    0.00488 
C38   1    0.094213    1.303552    0.558282    11.00000    0.02917    0.02538 = 
         0.02631    0.00215    0.00185   -0.00229 
AFIX  43 
H38A  2    0.046429    1.258552    0.573572    11.00000   -1.20000 
AFIX   0 
C39   1    0.259079    1.408849    0.555094    11.00000    0.02885    0.04033 = 
         0.02846   -0.00289    0.00110   -0.00451 
AFIX  43 
H39A  2    0.325555    1.436272    0.568397    11.00000   -1.20000 
AFIX   0 
C40   1    0.065405    1.331057    0.516215    11.00000    0.02913    0.02602 = 
         0.02993    0.00132   -0.00546   -0.00356 
AFIX  43 
H40A  2   -0.001295    1.304409    0.502921    11.00000   -1.20000 
AFIX   0 
C41   1    0.231985    1.436991    0.513825    11.00000    0.03330    0.03494 = 
         0.02993   -0.00032    0.00761   -0.00622 
AFIX  43 
H41A  2    0.279513    1.483401    0.498784    11.00000   -1.20000 
AFIX   0 
C42   1    0.135156    1.397395    0.494299    11.00000    0.03638    0.02080 = 
         0.02152    0.00006    0.00155    0.00210 
C43   1    0.026796    1.372941    0.430233    11.00000    0.05432    0.03886 = 
         0.02559    0.00340   -0.00913   -0.01062 
AFIX 137 
H43D  2    0.026094    1.394910    0.400836    11.00000   -1.50000 
H43E  2   -0.037642    1.405713    0.440280    11.00000   -1.50000 
H43F  2    0.030518    1.277800    0.433665    11.00000   -1.50000 
AFIX   0 
C44   1    0.208808    1.428072    0.647324    11.00000    0.02905    0.02549 = 
         0.01737    0.00020   -0.00096    0.00415 
C45   1    0.113388    1.449795    0.662654    11.00000    0.02921    0.02807 = 
         0.02116    0.00028    0.00400   -0.00483 
AFIX  43 
H45A  2    0.057673    1.388580    0.657060    11.00000   -1.20000 
AFIX   0 
C46   1    0.289148    1.518164    0.655903    11.00000    0.02349    0.03367 = 
         0.02545   -0.00119    0.00284    0.00478 
AFIX  43 
H46A  2    0.355068    1.503231    0.645925    11.00000   -1.20000 
AFIX   0 
C47   1    0.098922    1.559923    0.686007    11.00000    0.02688    0.03242 = 
         0.02234   -0.00048    0.00716   -0.00057 
AFIX  43 
H47A  2    0.033631    1.573449    0.696637    11.00000   -1.20000 
AFIX   0 
C48   1    0.275015    1.630073    0.678861    11.00000    0.02398    0.02899 = 
         0.02451   -0.00045    0.00066   -0.00187 
AFIX  43 
H48A  2    0.330414    1.691868    0.684150    11.00000   -1.20000 
AFIX   0 
C49   1    0.179272    1.650797    0.693999    11.00000    0.02924    0.02419 = 
         0.01779    0.00082    0.00215    0.00277 
C50   1    0.235894    1.855914    0.723462    11.00000    0.03523    0.02825 = 
         0.04041   -0.00881    0.00549   -0.00398 
AFIX 137 
H50A  2    0.210735    1.926994    0.739989    11.00000   -1.50000 
H50B  2    0.250873    1.890173    0.696589    11.00000   -1.50000 
H50C  2    0.300270    1.818522    0.738160    11.00000   -1.50000 
 
AFIX   0 
HKLF 4 
 
REM  x15357 : space group P21/n 
REM R1 =  0.0410 for    7199 Fo > 4sig(Fo)  and  0.0431 for all    7642 data 
REM    522 parameters refined using      0 restraints 
 
END 
 
WGHT      0.0436      2.8052 
 
REM Highest difference peak  0.329,  deepest hole -0.284,  1-sigma level  0.041 
Q1    1   0.6260  0.6480  0.7416  11.00000  0.05    0.33 
Q2    1   0.6500  0.6151  0.6935  11.00000  0.05    0.29 
Q3    1   0.7199  0.7402  0.7160  11.00000  0.05    0.27 
Q4    1   0.0182  1.3278  0.4590  11.00000  0.05    0.27 
Q5    1   0.6160  0.7693  0.6934  11.00000  0.05    0.21 
; 
_shelx_res_checksum   65698 
 
_shelx_hkl_file
;
  -1   0   0   -0.99    0.03
   1   0   0   -1.04    0.04
   1   0   0   -0.99    0.03
  -1   0   0   -1.02    0.03
  -1   0   0   -1.03    0.04
  -1   0   0   -0.92    0.04
   2   0   0  801.38   43.03
  -2   0   0  815.55   43.06
  -2   0   0  738.05   41.67
  -2   0   0  749.55   44.23
   2   0   0  828.52   43.10
   2   0   0  769.86   44.22
   2   0   0  771.16   42.37
   2   0   0  790.55   41.68
   3   0   0   -0.01    0.06
   3   0   0    0.01    0.04
   3   0   0    0.18    0.06
   3   0   0    0.18    0.06
  -3   0   0    0.17    0.07
  -3   0   0    0.16    0.10
  -3   0   0    0.02    0.04
  -3   0   0    0.21    0.06
   3   0   0    0.12    0.10
  -4   0   0   50.77    2.75
  -4   0   0   43.50    2.74
   4   0   0   48.01    2.74
   4   0   0   47.14    2.76
  -4   0   0   44.73    2.59
  -4   0   0   51.33    2.76
   4   0   0   47.12    2.62
   4   0   0   46.35    2.74
   4   0   0   49.81    2.59
   5   0   0    0.72    0.19
   5   0   0    0.44    0.10
   5   0   0    0.06    0.10
  -5   0   0    0.73    0.13
  -5   0   0    0.68    0.18
   5   0   0    0.91    0.13
  -6   0   0    1.39    0.26
   6   0   0    1.54    0.18
   6   0   0    1.23    0.24
   6   0   0    1.39    0.16
   6   0   0    1.27    0.17
   7   0   0    0.06    0.10
   7   0   0    0.03    0.10
   7   0   0    0.13    0.10
   8   0   0   52.38    2.97
   8   0   0   54.51    3.12
   8   0   0   51.61    2.94
   9   0   0    0.70    0.19
  10   0   0    0.18    0.16
  10   0   0    0.19    0.12
  10   0   0    0.09    0.06
  10   0   0    0.03    0.09
  11   0   0    0.08    0.06
  11   0   0    0.16    0.14
  11   0   0    0.14    0.08
  12   0   0    1.85    0.17
  13   0   0    0.00    0.10
  14   0   0    9.42    0.55
  15   0   0   -0.01    0.05
   0  -1   0   -0.04    0.03
   0   1   0   -0.12    0.03
   0   1   0   -0.11    0.01
   0   1   0   -0.15    0.02
   0   1   0   -0.10    0.02
   0   1   0   -0.11    0.02
   0   1   0   -0.01    0.03
   0   1   0   -0.16    0.02
   1  -1   0   29.91    1.64
   1  -1   0   32.74    1.72
  -1  -1   0   32.65    1.69
   1  -1   0   28.45    1.74
  -1  -1   0   33.13    1.68
   1  -1   0   32.20    1.73
   1   1   0   28.04    1.63
  -1   1   0   28.95    1.73
  -1   1   0   32.85    1.73
   1   1   0   28.80    1.65
  -1   1   0   27.74    1.71
   1   1   0   30.09    1.63
   1   1   0   32.56    1.69
   1   1   0   29.92    1.62
   1   1   0   31.89    1.68
   1   1   0   29.34    1.67
  -1   1   0   30.66    1.74
   1   1   0   30.10    1.74
  -1   1   0   28.81    1.74
  -1   1   0   30.11    1.64
   1   1   0   29.90    1.72
   1   1   0   27.98    1.73
   2  -1   0  289.20   15.91
   2  -1   0  317.32   16.00
  -2  -1   0  297.64   15.98
   2  -1   0  284.73   15.47
   2  -1   0  272.22   16.41
  -2  -1   0  317.72   16.00
   2  -1   0  268.01   15.67
   2   1   0  281.56   15.61
   2   1   0  285.04   15.46
  -2   1   0  284.41   15.51
  -2   1   0  271.80   16.33
  -2   1   0  291.18   15.94
   2   1   0  299.04   16.00
   2   1   0  273.87   16.41
   2   1   0  284.18   15.78
   2   1   0  274.15   15.46
  -2   1   0  319.24   16.06
  -2   1   0  281.75   16.44
   2   1   0  313.33   16.03
   2   1   0  284.19   16.41
  -3  -1   0   55.20    2.98
   3  -1   0   53.33    2.86
   3  -1   0   49.11    2.88
  -3  -1   0   55.37    2.98
   3  -1   0   51.97    3.02
   3  -1   0   53.74    3.03
   3  -1   0   55.54    3.02
   3   1   0   53.03    2.90
   3   1   0   54.25    3.01
   3   1   0   53.50    2.84
  -3   1   0   57.83    3.03
  -3   1   0   52.47    2.86
  -3   1   0   55.93    3.02
  -3   1   0   49.37    2.99
   3   1   0   46.31    2.84
   3   1   0   53.62    2.97
  -3   1   0   52.60    3.03
   3   1   0   49.85    3.01
   3   1   0   52.90    2.98
  -4  -1   0    0.19    0.11
   4  -1   0    0.34    0.13
   4  -1   0    0.47    0.09
   4  -1   0    0.40    0.09
   4  -1   0    0.33    0.07
   4  -1   0    0.35    0.13
  -4  -1   0    0.68    0.14
  -4   1   0    0.45    0.16
   4   1   0    0.87    0.16
  -4   1   0    0.51    0.09
   4   1   0    0.79    0.10
  -4   1   0    0.31    0.12
  -4   1   0    0.48    0.09
   4   1   0    0.39    0.10
  -4   1   0    0.39    0.07
   4   1   0    0.18    0.08
   4   1   0    0.52    0.13
   4   1   0    0.59    0.09
   4   1   0    0.36    0.08
  -5  -1   0   57.21    3.33
   5  -1   0   60.08    3.16
   5  -1   0   57.22    3.34
   5  -1   0   57.87    3.17
  -5  -1   0   61.99    3.33
   5  -1   0   57.57    3.36
   5  -1   0   56.24    3.38
   5   1   0   55.89    3.33
  -5   1   0   59.94    3.38
  -5   1   0   51.77    3.26
   5   1   0   59.77    3.20
  -5   1   0   58.06    3.36
  -5   1   0   57.46    3.16
   5   1   0   58.06    3.13
  -5   1   0   57.18    3.34
   5   1   0   60.82    3.32
   5   1   0   55.17    3.31
   6  -1   0   11.56    0.73
   6  -1   0   10.44    0.87
   6  -1   0   12.23    0.77
   6  -1   0   12.00    0.71
   6  -1   0    9.53    0.88
   6   1   0   11.77    0.75
  -6   1   0    9.94    0.86
   6   1   0   13.57    0.72
   6   1   0   11.35    0.85
   6   1   0   12.33    0.74
   7  -1   0   44.81    2.59
   7  -1   0   46.77    2.75
   7  -1   0   43.04    2.59
   7   1   0   45.60    2.72
   7   1   0   46.91    2.63
   7   1   0   50.03    2.61
   7   1   0   48.49    2.58
   8  -1   0   24.80    1.57
   8   1   0   26.87    1.55
   8   1   0   23.92    1.25
   8   1   0   27.03    1.50
   8   1   0   22.92    1.46
   8   1   0   26.23    1.47
   9  -1   0    6.27    0.55
   9  -1   0    5.87    0.44
   9  -1   0    6.90    0.39
   9   1   0    7.35    0.46
   9   1   0    7.70    0.54
   9   1   0    8.05    0.57
   9   1   0    7.41    0.55
  10  -1   0    4.08    0.31
  10   1   0    4.49    0.32
  10   1   0    4.71    0.46
  11  -1   0    3.19    0.36
  11   1   0    2.75    0.39
  11   1   0    3.73    0.27
  11   1   0    3.30    0.26
  12   1   0    6.12    0.33
  12   1   0    5.98    0.38
  12   1   0    5.54    0.41
  13   1   0    8.48    0.57
  13   1   0    9.74    0.55
  14  -1   0    0.37    0.09
  14   1   0    0.25    0.08
  15  -1   0    0.51    0.08
   0  -2   0  126.53    6.63
   0  -2   0  135.12    6.66
   0   2   0  119.29    6.43
   0   2   0  114.95    6.75
   0   2   0  110.57    6.33
   0   2   0  116.38    6.44
   0   2   0  126.50    6.61
   0   2   0  120.51    6.43
   0   2   0  115.16    6.80
   0   2   0  127.74    6.64
   0   2   0  114.47    6.82
   0   2   0  112.08    6.48
   1  -2   0  269.68   13.49
   1  -2   0  271.60   13.54
  -1   2   0  240.34   13.90
  -1   2   0  244.48   13.94
  -1   2   0  215.89   13.82
   1   2   0  231.79   12.96
  -1   2   0  266.85   13.48
   1   2   0  227.03   13.74
   1   2   0  239.40   13.22
  -1   2   0  245.10   13.43
  -1   2   0  239.62   13.09
  -1   2   0  246.36   13.11
   1   2   0  242.73   13.33
   2  -2   0  178.83    9.17
   2  -2   0  145.39    9.35
  -2  -2   0  179.00    9.13
   2  -2   0  176.53    9.16
   2  -2   0  153.59    8.81
  -2  -2   0  178.68    9.11
  -2   2   0  150.25    9.35
   2   2   0  163.15    8.96
  -2   2   0  164.93    9.43
  -2   2   0  161.23    8.93
  -2   2   0  166.27    9.15
  -2   2   0  169.47    9.39
  -2   2   0  179.49    9.15
   2   2   0  169.25    8.81
   2   2   0  169.19    9.12
   2   2   0  165.06    9.37
   2   2   0  160.07    8.83
   2   2   0  170.44    9.37
   2   2   0  165.32    8.82
   2   2   0  159.86    8.88
   2   2   0  157.77    9.09
   2   2   0  156.85    9.32
  -3  -2   0   31.66    1.72
   3  -2   0   28.42    1.80
   3  -2   0   31.87    1.80
  -3  -2   0   32.44    1.71
   3  -2   0   29.35    1.67
   3  -2   0   25.89    1.64
   3  -2   0   28.81    1.76
  -3   2   0   29.48    1.74
   3   2   0   27.56    1.63
   3   2   0   29.18    1.66
   3   2   0   31.14    1.71
   3   2   0   32.31    1.73
   3   2   0   33.08    1.64
   3   2   0   29.04    1.73
  -3   2   0   29.07    1.78
   3   2   0   31.30    1.63
  -3   2   0   31.27    1.76
   3   2   0   30.25    1.69
   3   2   0   27.90    1.72
  -3   2   0   31.86    1.80
  -3   2   0   31.46    1.67
   3   2   0   32.08    1.72
   4  -2   0    0.69    0.12
   4  -2   0    0.57    0.11
   4  -2   0    0.56    0.18
   4  -2   0    0.49    0.07
   4  -2   0    0.61    0.16
  -4  -2   0    0.73    0.14
  -4   2   0    0.69    0.11
   4   2   0    0.66    0.10
  -4   2   0    0.65    0.16
  -4   2   0    0.61    0.10
   4   2   0    0.64    0.13
  -4   2   0    0.48    0.15
   4   2   0    0.76    0.09
  -4   2   0    0.74    0.12
   4   2   0    0.82    0.13
   5  -2   0    0.00    0.05
  -5  -2   0    0.09    0.11
   5  -2   0    0.13    0.10
   5  -2   0    0.03    0.09
  -5  -2   0    0.16    0.10
   5  -2   0    0.04    0.16
   5  -2   0    0.09    0.17
   5   2   0    0.05    0.07
  -5   2   0    0.13    0.15
   5   2   0    0.32    0.12
   5   2   0    0.22    0.07
   5   2   0    0.02    0.06
  -5   2   0    0.14    0.09
  -5   2   0   -0.03    0.14
  -5   2   0    0.05    0.06
   5   2   0   -0.01    0.09
   5   2   0    0.19    0.07
   5   2   0    0.09    0.06
  -5   2   0    0.17    0.10
   6  -2   0    2.05    0.39
   6  -2   0    3.24    0.30
   6  -2   0    2.94    0.29
  -6   2   0    3.37    0.30
  -6   2   0    2.97    0.28
   6   2   0    3.39    0.30
   6   2   0    3.69    0.26
  -6   2   0    2.12    0.36
   6   2   0    3.49    0.28
   6   2   0    3.65    0.27
   7  -2   0   71.27    4.34
   7  -2   0   70.04    4.09
   7   2   0   76.38    4.17
   7   2   0   77.41    4.30
   7   2   0   74.15    4.05
   7   2   0   78.61    4.12
   8   2   0   13.14    0.84
   8   2   0   14.94    0.91
   8   2   0   14.14    0.75
   8   2   0   15.19    0.92
   8   2   0   13.90    0.71
   8   2   0   13.36    0.68
   8   2   0   15.34    0.88
   9  -2   0   89.72    5.16
   9   2   0  104.69    5.23
   9   2   0   96.79    5.60
   9   2   0  105.15    5.51
   9   2   0   99.76    5.46
   9   2   0   96.58    5.68
   9   2   0   98.43    4.59
  10   2   0   29.77    1.81
  10   2   0   33.44    1.70
  10   2   0   29.75    1.87
  11   2   0    4.02    0.50
  11   2   0    4.44    0.33
  11   2   0    4.75    0.33
  12   2   0    3.01    0.26
  12   2   0    2.96    0.27
  13   2   0   11.73    0.67
  13   2   0   11.49    0.72
  14  -2   0   13.05    0.66
  14   2   0   10.47    0.69
  14   2   0   11.41    0.65
   0  -3   0    0.03    0.05
   0  -3   0    0.04    0.05
   0   3   0    0.03    0.03
   0   3   0    0.04    0.05
   0   3   0    0.04    0.03
   0   3   0    0.10    0.05
   0   3   0   -0.03    0.04
   0   3   0    0.09    0.06
   0   3   0    0.12    0.04
   0   3   0    0.07    0.03
   0   3   0    0.06    0.04
   0   3   0   -0.04    0.07
   1  -3   0   89.55    4.80
   1  -3   0   95.10    4.80
  -1   3   0   87.28    4.88
  -1   3   0   88.65    4.60
   1   3   0   86.71    4.65
  -1   3   0   91.41    4.80
  -1   3   0   75.93    4.87
   1   3   0   83.10    4.68
  -1   3   0   88.77    4.78
   1   3   0   85.66    4.87
   1   3   0   83.47    4.56
  -1   3   0   84.22    4.87
  -1   3   0   80.61    4.57
  -1   3   0   84.41    4.59
   2  -3   0    4.26    0.37
   2  -3   0    3.94    0.35
  -2   3   0    4.00    0.32
  -2   3   0    4.09    0.29
  -2   3   0    4.11    0.35
   2   3   0    4.46    0.30
   2   3   0    4.50    0.30
  -2   3   0    3.87    0.28
   2   3   0    4.54    0.28
  -2   3   0    4.16    0.34
  -2   3   0    3.46    0.28
  -2   3   0    4.44    0.29
   2   3   0    4.62    0.29
   3  -3   0    1.22    0.16
   3  -3   0    1.11    0.22
   3  -3   0    1.29    0.23
   3  -3   0    0.93    0.14
  -3   3   0    1.82    0.18
   3   3   0    1.24    0.13
  -3   3   0    1.43    0.15
   3   3   0    1.40    0.14
  -3   3   0    1.21    0.21
  -3   3   0    1.19    0.20
   3   3   0    1.37    0.17
  -3   3   0    1.53    0.17
   3   3   0    1.41    0.14
  -4  -3   0    8.86    0.54
  -4  -3   0    8.58    0.55
   4  -3   0    7.10    0.69
   4  -3   0    8.00    0.67
  -4   3   0    7.97    0.66
   4   3   0    9.95    0.57
   4   3   0    8.74    0.54
   4   3   0    8.91    0.50
   4   3   0    8.14    0.54
  -4   3   0    9.65    0.60
  -4   3   0    8.95    0.57
   4   3   0    9.37    0.50
  -4   3   0    8.94    0.59
  -4   3   0    8.60    0.68
   4   3   0    8.88    0.55
   4   3   0   10.01    0.53
   4   3   0    8.69    0.53
   5  -3   0  103.74    6.61
  -5  -3   0  102.31    6.42
  -5   3   0  113.01    6.59
   5   3   0  110.02    6.56
  -5   3   0  124.54    6.64
   5   3   0  112.80    6.28
   5   3   0  122.15    6.18
   5   3   0  107.28    6.43
  -5   3   0  124.27    6.26
   5   3   0  107.51    6.18
  -5   3   0  120.61    6.57
   5   3   0  131.39    6.56
   5   3   0  125.10    6.36
  -6   3   0    5.22    0.40
   6   3   0    5.90    0.38
  -6   3   0    5.29    0.44
  -6   3   0    5.61    0.46
   6   3   0    5.57    0.44
   6   3   0    5.99    0.37
   6   3   0    5.94    0.43
   7   3   0   11.54    0.71
   7   3   0   11.42    0.58
   7   3   0   11.72    0.62
   7   3   0   11.92    0.77
   7   3   0   11.26    0.56
  -7   3   0   11.35    0.81
  -7   3   0   10.99    0.78
   7   3   0   12.25    0.70
   7   3   0   12.58    0.74
   8   3   0    7.73    0.49
   8   3   0    8.76    0.56
   8   3   0    8.32    0.41
   8   3   0    8.14    0.42
   8   3   0    8.14    0.52
   8   3   0    8.28    0.45
   8   3   0    7.75    0.48
   8   3   0    8.55    0.61
   9   3   0    6.35    0.42
   9   3   0    6.17    0.38
   9   3   0    6.27    0.36
   9   3   0    5.76    0.52
  10   3   0    5.46    0.34
  10   3   0    4.12    0.48
  10   3   0    5.19    0.36
  11   3   0    0.22    0.12
  11   3   0    0.23    0.11
  12   3   0    8.80    0.57
  12   3   0    9.15    0.55
  13   3   0    2.01    0.21
  13   3   0    1.99    0.17
  14   3   0    0.87    0.10
  14   3   0    0.81    0.11
   0  -4   0   13.79    0.83
   0  -4   0   14.27    0.83
   0   4   0   14.02    0.82
   0   4   0   14.91    0.84
   0   4   0   14.51    0.77
   0   4   0   12.91    0.80
   0   4   0   13.45    0.81
   0   4   0   14.21    0.78
   0   4   0   14.61    0.82
   0   4   0   14.02    0.83
   0   4   0   15.41    0.89
   0   4   0   14.30    0.82
   1  -4   0    0.42    0.11
   1  -4   0    0.46    0.11
   1   4   0    0.48    0.10
  -1   4   0    0.56    0.12
   1   4   0    0.50    0.11
  -1   4   0    0.54    0.08
   1   4   0    0.42    0.08
   1   4   0    0.43    0.09
  -1   4   0    0.44    0.12
  -1   4   0    0.55    0.10
  -1   4   0    0.54    0.07
  -1   4   0    0.62    0.08
  -1   4   0    0.58    0.08
  -1   4   0    0.55    0.11
   2  -4   0   15.63    1.05
   2  -4   0   16.48    1.07
   2   4   0   16.63    0.97
  -2   4   0   17.97    0.95
  -2   4   0   16.07    1.03
  -2   4   0   17.35    1.03
  -2   4   0   16.85    0.96
  -2   4   0   18.26    1.00
   2   4   0   16.89    0.94
   2   4   0   16.21    1.01
  -2   4   0   15.05    0.94
   2   4   0   16.65    0.97
  -2   4   0   16.46    1.06
  -2   4   0   15.31    0.99
   3   4   0   62.43    3.40
   3   4   0   62.69    3.43
   3   4   0   65.68    3.33
   3   4   0   60.85    3.54
  -3   4   0   56.50    3.55
  -3   4   0   60.71    3.57
  -3   4   0   66.17    3.38
  -3   4   0   62.33    3.57
  -3   4   0   60.02    3.58
   4   4   0   64.76    3.76
   4   4   0   72.47    3.65
  -4   4   0   69.36    3.71
  -4   4   0   68.58    3.92
   4   4   0   64.32    3.72
  -4   4   0   68.07    3.91
   5   4   0   39.33    2.23
   5   4   0   37.01    2.19
  -5   4   0   40.21    2.31
  -5   4   0   38.51    2.29
  -5   4   0   39.37    2.19
  -6   4   0    3.09    0.31
   6   4   0    2.33    0.25
  -6   4   0    2.49    0.26
   7   4   0    8.44    0.62
   7   4   0    8.48    0.52
   7   4   0    8.15    0.50
   7   4   0    8.37    0.42
   7   4   0    8.66    0.63
   7   4   0    9.46    0.57
   7   4   0    8.89    0.48
   7   4   0    8.59    0.54
   8   4   0    2.57    0.21
   8   4   0    2.68    0.21
   8   4   0    2.57    0.23
   8   4   0    2.19    0.31
   8   4   0    2.77    0.19
   8   4   0    2.67    0.16
   9   4   0    1.71    0.15
   9   4   0    1.78    0.18
   9   4   0    1.85    0.13
  -9   4   0    1.42    0.16
   9   4   0    1.79    0.21
   9   4   0    1.80    0.16
  10   4   0    4.59    0.32
  10   4   0    4.46    0.33
  11   4   0    3.00    0.23
  11   4   0    2.78    0.27
  12   4   0    1.57    0.15
  12   4   0    1.45    0.20
  13   4   0    0.08    0.08
  13   4   0    0.14    0.07
  14   4   0    0.91    0.11
   0   5   0    0.05    0.04
   0   5   0    0.04    0.02
   0   5   0    0.02    0.05
   0   5   0   -0.12    0.09
   1  -5   0    3.58    0.37
  -1   5   0    4.33    0.29
  -1   5   0    4.13    0.29
   1   5   0    4.47    0.30
  -1   5   0    4.22    0.28
  -1   5   0    4.23    0.32
  -1   5   0    4.45    0.36
   1   5   0    4.70    0.32
   1   5   0    4.70    0.34
  -1   5   0    3.86    0.33
  -1   5   0    4.55    0.29
   1   5   0    4.97    0.38
  -2   5   0   22.64    1.35
   2   5   0   24.09    1.45
   2   5   0   23.45    1.37
   2   5   0   23.75    1.37
   2   5   0   23.48    1.33
  -2   5   0   24.58    1.46
  -2   5   0   24.80    1.34
  -2   5   0   23.53    1.40
   3   5   0   43.06    2.44
  -3   5   0   44.24    2.40
  -3   5   0   43.61    2.40
   3   5   0   43.77    2.37
  -3   5   0   45.16    2.57
   3   5   0   40.32    2.52
   3   5   0   42.65    2.43
  -3   5   0   44.33    2.53
   4   5   0    0.31    0.10
  -4   5   0    0.48    0.12
  -4   5   0    0.40    0.12
  -4   5   0    0.22    0.13
   4   5   0    0.37    0.13
   4   5   0    0.24    0.11
   4   5   0    0.29    0.10
  -4   5   0    0.40    0.14
   5   5   0    3.59    0.27
  -5   5   0    4.10    0.38
  -5   5   0    4.41    0.37
  -5   5   0    4.12    0.35
   5   5   0    4.04    0.35
   5   5   0    4.28    0.35
  -5   5   0    3.59    0.24
   5   5   0    3.98    0.26
   5   5   0    4.21    0.24
  -6   5   0    2.02    0.26
   6   5   0    2.29    0.27
  -6   5   0    1.95    0.16
   6   5   0    2.49    0.16
  -6   5   0    2.06    0.19
   6   5   0    2.72    0.20
   6   5   0    2.40    0.19
   6   5   0    2.41    0.21
   6   5   0    2.16    0.12
   7   5   0   45.41    2.76
  -7   5   0   44.61    2.72
  -7   5   0   45.28    2.75
   7   5   0   52.51    2.48
   7   5   0   47.99    2.78
  -7   5   0   45.73    2.39
   7   5   0   51.59    2.81
   7   5   0   47.61    2.60
   7   5   0   49.27    2.26
   7   5   0   54.36    2.99
  -8   5   0    0.70    0.12
   8   5   0    0.79    0.11
   8   5   0    0.75    0.12
   8   5   0    0.88    0.14
   8   5   0    0.79    0.08
   9   5   0    0.28    0.09
   9   5   0    0.13    0.09
   9   5   0    0.10    0.15
   9   5   0    0.08    0.08
  10   5   0    3.24    0.26
  10   5   0    3.17    0.26
  11   5   0    1.17    0.15
  11   5   0    1.54    0.20
  12   5   0    0.42    0.13
  12   5   0    0.33    0.11
  13   5   0    0.42    0.08
  13   5   0    0.55    0.10
   0   6   0    1.61    0.17
   0   6   0    1.61    0.24
  -1   6   0   25.51    1.55
  -1   6   0   26.75    1.44
  -1   6   0   22.87    1.43
   1   6   0   23.96    1.53
   1   6   0   24.60    1.41
  -1   6   0   25.73    1.42
  -1   6   0   24.51    1.35
  -2   6   0    1.71    0.23
   2   6   0    1.90    0.20
  -2   6   0    1.89    0.19
   2   6   0    1.74    0.19
   2   6   0    2.65    0.27
  -2   6   0    2.05    0.28
  -2   6   0    2.04    0.19
   2   6   0    1.93    0.23
   3   6   0    0.09    0.10
  -3   6   0    0.21    0.10
  -3   6   0    0.10    0.08
  -3   6   0    0.07    0.06
   3   6   0    0.27    0.11
   3   6   0    0.10    0.06
   3   6   0    0.16    0.11
  -3   6   0    0.12    0.09
  -3   6   0    0.09    0.05
  -3   6   0    0.08    0.05
  -3   6   0    0.11    0.05
  -3   6   0    0.11    0.05
  -4   6   0    4.44    0.37
  -4   6   0    4.40    0.25
   4   6   0    3.93    0.33
   4   6   0    4.74    0.27
  -4   6   0    4.34    0.36
   4   6   0    4.08    0.37
   4   6   0    4.14    0.28
  -4   6   0    4.41    0.24
   4   6   0    4.05    0.28
  -4   6   0    4.37    0.39
   4   6   0    4.60    0.31
  -4   6   0    4.14    0.29
   4   6   0    4.37    0.28
   4   6   0    4.51    0.29
  -4   6   0    4.40    0.28
   4   6   0    4.18    0.30
   4   6   0    4.52    0.36
  -5   6   0    3.89    0.28
   5   6   0    3.71    0.26
   5   6   0    4.18    0.24
   5   6   0    3.67    0.27
   5   6   0    4.11    0.36
  -5   6   0    4.35    0.39
   5   6   0    4.15    0.28
  -5   6   0    3.92    0.23
   5   6   0    3.47    0.35
   5   6   0    3.64    0.26
   5   6   0    3.32    0.25
  -5   6   0    3.92    0.23
  -5   6   0    3.90    0.39
  -6   6   0    7.23    0.54
   6   6   0    6.18    0.39
  -6   6   0    6.66    0.55
   6   6   0    5.60    0.38
   6   6   0    6.51    0.43
   6   6   0    6.30    0.42
  -6   6   0    6.07    0.40
  -6   6   0    5.63    0.51
   6   6   0    6.56    0.37
   7   6   0   10.78    0.68
  -7   6   0   11.21    0.82
   7   6   0   11.04    0.64
   7   6   0   12.03    0.72
  -7   6   0    9.68    0.76
   7   6   0   11.82    0.60
  -7   6   0   10.64    0.58
  -7   6   0    9.84    0.66
   8   6   0   21.51    1.09
   8   6   0   20.97    1.23
   8   6   0   20.16    1.15
  -8   6   0   19.37    1.33
  -8   6   0   21.62    1.05
  -8   6   0   19.50    1.19
   9   6   0    6.67    0.40
   9   6   0    6.39    0.42
   9   6   0    6.70    0.46
  10   6   0    5.12    0.40
  10   6   0    5.69    0.37
  11   6   0    2.47    0.22
  11   6   0    3.00    0.24
  12   6   0    1.40    0.15
  13   6   0    0.28    0.08
 -13   6   0    0.48    0.08
   0   7   0    0.05    0.05
   0   7   0    0.00    0.05
   0   7   0    0.05    0.06
   0   7   0    0.04    0.06
   0   7   0    0.02    0.03
   0   7   0   -0.01    0.06
   0   7   0    0.03    0.06
  -1   7   0    4.55    0.30
   1   7   0    4.26    0.31
   1   7   0    4.08    0.28
  -1   7   0    4.01    0.31
  -1   7   0    4.25    0.41
   1   7   0    4.36    0.30
  -1   7   0    4.51    0.27
  -1   7   0    4.06    0.34
   1   7   0    4.57    0.28
  -1   7   0    4.34    0.28
  -1   7   0    4.39    0.27
  -1   7   0    4.16    0.22
   1   7   0    4.04    0.34
   1   7   0    3.77    0.28
  -2   7   0    0.29    0.08
   2   7   0    0.05    0.09
   2   7   0    0.13    0.07
   2   7   0    0.17    0.06
   2   7   0    0.29    0.08
   2   7   0    0.29    0.07
   2   7   0    0.13    0.06
  -2   7   0    0.28    0.07
   2   7   0    0.19    0.07
  -2   7   0    0.11    0.11
  -2   7   0    0.20    0.08
  -2   7   0    0.21    0.13
  -2   7   0    0.20    0.05
   3   7   0    1.36    0.15
  -3   7   0    1.30    0.17
   3   7   0    1.33    0.13
   3   7   0    1.28    0.14
  -3   7   0    1.20    0.14
  -3   7   0    1.31    0.23
   3   7   0    1.22    0.15
  -3   7   0    1.48    0.11
   3   7   0    1.07    0.18
   3   7   0    1.16    0.13
   3   7   0    1.22    0.14
  -3   7   0    1.30    0.15
  -4   7   0    9.97    0.48
   4   7   0   10.11    0.56
  -4   7   0    9.36    0.60
   4   7   0    9.63    0.58
   4   7   0    9.91    0.53
   4   7   0    9.38    0.60
   4   7   0    9.79    0.56
   4   7   0    9.83    0.64
   4   7   0    9.45    0.57
  -4   7   0    8.93    0.68
  -4   7   0    9.12    0.65
   5   7   0    0.96    0.11
   5   7   0    1.02    0.13
  -5   7   0    1.03    0.13
   5   7   0    0.90    0.11
  -5   7   0    0.90    0.13
   5   7   0    1.05    0.12
   5   7   0    1.08    0.14
   5   7   0    0.91    0.14
  -5   7   0    1.26    0.24
  -5   7   0    0.98    0.24
   6   7   0   19.08    1.02
   6   7   0   16.35    1.13
  -6   7   0   17.14    1.15
   6   7   0   18.56    1.12
  -6   7   0   18.25    1.14
  -6   7   0   16.67    1.18
   6   7   0   16.36    1.01
   6   7   0   17.48    1.06
   6   7   0   17.16    0.99
   6   7   0   18.59    0.94
  -6   7   0   17.50    1.03
   7   7   0    2.98    0.25
   7   7   0    3.27    0.25
  -7   7   0    2.50    0.38
   7   7   0    2.77    0.24
  -7   7   0    2.94    0.20
  -7   7   0    2.93    0.25
   7   7   0    3.29    0.24
   7   7   0    3.13    0.21
  -8   7   0   29.59    1.82
   8   7   0   34.04    1.67
   8   7   0   32.15    1.75
   8   7   0   32.81    1.88
   9   7   0   27.93    1.41
   9   7   0   27.00    1.59
   9   7   0   26.06    1.48
  10   7   0    1.14    0.17
  10   7   0    1.07    0.14
 -10   7   0    1.24    0.18
 -11   7   0    0.04    0.07
  11   7   0    0.14    0.08
  12   7   0    0.16    0.08
 -12   7   0    0.08    0.09
   0   8   0    8.43    0.51
   0   8   0    7.55    0.65
   0   8   0    8.53    0.49
   0   8   0    7.53    0.38
   0   8   0    7.84    0.55
   0   8   0    8.33    0.48
  -1   8   0    1.23    0.09
   1   8   0    0.99    0.13
   1   8   0    1.15    0.15
   1   8   0    1.09    0.14
  -1   8   0    1.25    0.16
   1   8   0    0.78    0.21
  -1   8   0    1.37    0.18
   1   8   0    1.04    0.13
   1   8   0    1.19    0.14
  -1   8   0    1.60    0.16
   2   8   0    0.76    0.11
   2   8   0    0.93    0.12
  -2   8   0    0.65    0.18
  -2   8   0    0.95    0.13
   2   8   0    0.69    0.12
  -2   8   0    0.73    0.08
  -2   8   0    0.81    0.11
   2   8   0    0.60    0.10
  -2   8   0    0.86    0.13
   2   8   0    0.76    0.10
  -2   8   0    0.93    0.13
   2   8   0    0.74    0.11
   3   8   0    3.40    0.27
   3   8   0    3.32    0.23
   3   8   0    3.35    0.25
  -3   8   0    3.23    0.27
   3   8   0    3.40    0.24
  -3   8   0    2.94    0.38
   3   8   0    3.14    0.24
  -3   8   0    3.56    0.24
   3   8   0    3.28    0.25
  -3   8   0    3.49    0.26
   3   8   0    3.47    0.25
  -3   8   0    3.12    0.33
  -3   8   0    3.35    0.20
   4   8   0    9.64    0.55
  -4   8   0    9.47    0.57
   4   8   0    9.05    0.51
  -4   8   0    8.87    0.69
   4   8   0    8.73    0.57
  -4   8   0    8.97    0.62
  -4   8   0    8.59    0.72
   4   8   0    8.94    0.53
   4   8   0    9.59    0.61
   4   8   0    8.87    0.55
   4   8   0    9.44    0.56
   5   8   0    1.10    0.16
   5   8   0    1.46    0.18
   5   8   0    1.29    0.13
   5   8   0    1.10    0.14
   5   8   0    1.14    0.14
  -5   8   0    1.65    0.20
  -5   8   0    1.45    0.12
   5   8   0    1.16    0.14
  -5   8   0    1.14    0.23
  -5   8   0    1.36    0.19
   6   8   0    0.30    0.08
   6   8   0    0.29    0.09
  -6   8   0    0.25    0.12
   6   8   0    0.39    0.09
  -6   8   0    0.30    0.12
   6   8   0    0.36    0.12
   6   8   0    0.38    0.10
   7   8   0    1.71    0.15
   7   8   0    1.50    0.15
  -7   8   0    1.46    0.16
  -7   8   0    1.42    0.13
   7   8   0    1.84    0.21
   7   8   0    1.45    0.18
  -7   8   0    1.41    0.20
   8   8   0    0.20    0.09
  -8   8   0    0.30    0.12
   8   8   0    0.19    0.10
   8   8   0    0.14    0.10
  -8   8   0    0.19    0.08
  -9   8   0    0.06    0.08
   9   8   0    0.16    0.07
   9   8   0    0.13    0.09
 -10   8   0    3.86    0.29
  10   8   0    3.48    0.27
 -11   8   0    2.03    0.17
   0   9   0    0.04    0.09
   0   9   0    0.06    0.11
   0   9   0    0.01    0.14
   0   9   0    0.04    0.11
  -1   9   0    2.33    0.19
   1   9   0    1.73    0.21
   1   9   0    2.15    0.21
   1   9   0    1.52    0.29
   1   9   0    2.31    0.23
   1   9   0    2.42    0.22
  -1   9   0    1.86    0.22
  -1   9   0    2.95    0.24
   2   9   0    0.97    0.14
  -2   9   0    0.95    0.12
   2   9   0    0.97    0.14
  -2   9   0    1.04    0.13
  -2   9   0    0.88    0.14
   2   9   0    1.17    0.15
   2   9   0    1.04    0.13
  -2   9   0    0.96    0.16
   3   9   0    0.48    0.09
  -3   9   0    0.28    0.09
  -3   9   0    0.30    0.10
   3   9   0    0.45    0.09
   3   9   0    0.51    0.12
   3   9   0    0.43    0.09
   3   9   0    0.39    0.10
   3   9   0    0.42    0.11
   4   9   0    1.47    0.16
   4   9   0    1.39    0.13
  -4   9   0    1.74    0.20
   4   9   0    1.52    0.17
   4   9   0    1.56    0.16
   4   9   0    1.52    0.18
  -4   9   0    1.98    0.22
   4   9   0    1.47    0.15
   5   9   0    2.90    0.21
  -5   9   0    2.75    0.23
   5   9   0    2.94    0.24
  -5   9   0    2.44    0.24
   5   9   0    2.98    0.23
   5   9   0    2.54    0.19
   5   9   0    2.66    0.23
   5   9   0    2.67    0.22
   6   9   0    0.74    0.13
   6   9   0    0.72    0.10
  -6   9   0    0.72    0.14
  -6   9   0    0.83    0.12
   6   9   0    0.61    0.09
   6   9   0    0.74    0.10
   6   9   0    0.73    0.10
  -7   9   0    9.65    0.58
  -7   9   0    9.92    0.65
   7   9   0    9.06    0.59
   7   9   0    9.55    0.52
  -8   9   0    5.52    0.40
   8   9   0    5.46    0.36
  -8   9   0    5.28    0.35
  -9   9   0    1.87    0.17
   9   9   0    2.24    0.20
 -10   9   0    0.08    0.05
  10   9   0   -0.01    0.05
   0  10   0   -0.11    0.11
   0  10   0    0.02    0.06
   0  10   0    0.23    0.09
  -1  10   0   37.88    2.37
   1  10   0   38.61    2.02
  -1  10   0   38.93    2.17
   1  10   0   38.76    2.16
   1  10   0   36.52    2.36
   2  10   0   12.37    0.70
   2  10   0   12.70    0.74
  -2  10   0   12.40    0.75
  -2  10   0   12.46    0.82
   2  10   0   12.14    0.81
   3  10   0   17.22    0.92
  -3  10   0   17.33    0.98
   3  10   0   15.51    1.06
  -3  10   0   16.62    1.07
   3  10   0   16.58    0.97
   4  10   0    4.75    0.30
   4  10   0    4.41    0.32
  -4  10   0    4.13    0.33
   4  10   0    4.37    0.29
   4  10   0    4.57    0.31
  -4  10   0    4.93    0.32
  -5  10   0    0.08    0.08
   5  10   0    0.05    0.06
   5  10   0    0.14    0.08
   5  10   0    0.03    0.07
  -5  10   0    0.12    0.07
   5  10   0    0.07    0.09
   5  10   0    0.13    0.08
  -6  10   0    0.16    0.07
   6  10   0    0.19    0.06
   6  10   0    0.10    0.07
  -6  10   0    0.32    0.11
  -7  10   0    0.22    0.07
   7  10   0    0.29    0.08
  -7  10   0    0.27    0.09
  -8  10   0    0.48    0.08
  -8  10   0    0.72    0.08
   8  10   0    0.75    0.09
   0  11   0   -0.01    0.07
   0  11   0    0.05    0.08
  -1  11   0    4.28    0.28
   1  11   0    3.76    0.28
  -1  11   0    3.49    0.28
   1  11   0    4.28    0.28
  -2  11   0    6.26    0.47
   2  11   0    7.18    0.44
  -2  11   0    7.70    0.46
  -3  11   0    0.46    0.10
   3  11   0    0.50    0.09
  -3  11   0    0.26    0.07
   4  11   0    0.65    0.10
  -4  11   0    0.78    0.13
  -4  11   0    0.54    0.09
  -5  11   0    2.20    0.16
  -5  11   0    1.53    0.14
  -6  11   0    0.37    0.06
   0  12   0    0.85    0.10
  -1  12   0    0.25    0.07
   1  12   0    0.10    0.06
  -2  12   0    1.04    0.12
   2  12   0    1.25    0.11
  -3  12   0    1.96    0.15
  15   0  -1    2.39    0.18
  14   0  -1   -0.05    0.10
  13   0  -1    9.08    0.54
  12   0  -1    0.03    0.07
  11   0  -1    0.18    0.19
  11   0  -1    0.13    0.07
  11   0  -1    0.10    0.07
  10   0  -1   -0.08    0.08
  10   0  -1   -0.02    0.10
  10   0  -1   -0.06    0.10
  10   0  -1    0.02    0.06
   9   0  -1    4.16    0.29
   9   0  -1    4.56    0.41
   9   0  -1    4.38    0.42
   8   0  -1    0.10    0.10
   7   0  -1   32.23    1.81
   7   0  -1   31.63    1.91
   7   0  -1   31.56    1.82
  -6   0   1    0.04    0.15
   6   0  -1    0.07    0.11
   6   0  -1    0.27    0.08
   6   0  -1    0.08    0.07
   6   0  -1    0.25    0.10
  -5   0   1    0.05    0.12
   5   0  -1    0.11    0.08
   5   0  -1    0.04    0.13
   5   0  -1   -0.06    0.11
   5   0  -1    0.05    0.07
  -5   0   1    0.03    0.08
   5   0  -1    0.12    0.07
  -5   0   1   -0.05    0.11
  -5   0   1    0.08    0.08
  -4   0   1   -0.13    0.10
   4   0  -1   -0.03    0.07
   4   0  -1   -0.03    0.07
  -4   0   1    0.31    0.12
   4   0  -1   -0.16    0.10
   4   0  -1    0.13    0.09
   4   0  -1    0.19    0.07
  -4   0   1   -0.14    0.06
  -3   0   1   91.94    4.75
  -3   0   1   91.32    4.75
   3   0  -1   82.80    4.74
   3   0  -1   82.05    4.61
   3   0  -1   89.24    4.76
  -3   0   1   79.90    4.54
   3   0  -1   83.18    4.54
   3   0  -1   82.14    4.81
  -3   0   1   80.20    4.82
   2   0  -1   -0.09    0.06
  -2   0   1   -0.16    0.06
   2   0  -1    0.05    0.04
   2   0  -1   -0.04    0.04
   2   0  -1   -0.06    0.06
   2   0  -1   -0.14    0.04
  -2   0   1   -0.13    0.04
   1   0  -1    1.13    0.13
   1   0  -1    1.22    0.13
  -1   0   1    1.03    0.11
   1   0  -1    1.06    0.11
   1   0  -1    1.08    0.11
  -1   0   1    1.22    0.13
   1   0  -1    1.04    0.11
  -1   0   1    1.08    0.11
   1   0  -1    0.93    0.10
  -1   0   1    1.11    0.13
   0   0  -1   -0.23    0.01
   0   0   1   -0.22    0.01
   0   0  -1   -0.23    0.01
   0   0  -1   -0.23    0.01
   0   0   1   -0.24    0.01
   0   0  -1   -0.23    0.00
   0   0   1   -0.23    0.01
   0   0   1   -0.22    0.01
   0   0  -1   -0.23    0.00
   0   0   1   -0.23    0.00
  -1   0  -1   49.38    2.65
   1   0   1   50.47    2.66
   1   0   1   49.36    2.65
   1   0   1   47.52    2.55
  -1   0  -1   44.31    2.71
  -1   0  -1   45.60    2.55
   1   0   1   43.92    2.59
  -1   0  -1   51.85    2.66
   1   0   1   42.67    2.71
   1   0   1   47.06    2.71
   2   0   1    0.45    0.08
   2   0   1    0.45    0.11
  -2   0  -1    0.28    0.10
  -2   0  -1    0.36    0.08
  -3   0  -1    3.78    0.28
  -3   0  -1    3.65    0.23
  -3   0  -1    2.62    0.27
   3   0   1    2.46    0.20
  -3   0  -1    2.30    0.20
   4   0   1    0.22    0.08
  -4   0  -1    0.03    0.06
  -4   0  -1    0.07    0.08
   4   0   1    0.00    0.06
  -4   0  -1    0.10    0.11
   4   0   1    0.02    0.10
   4   0   1   -0.09    0.10
   4   0   1    0.09    0.07
  -4   0  -1    0.00    0.06
   5   0   1  193.19   11.01
  -5   0  -1  181.68   10.56
  -5   0  -1  203.21   11.01
   5   0   1  211.76   10.56
  -5   0  -1  208.92   11.00
   5   0   1  197.47   11.20
   5   0   1  207.95   10.73
   5   0   1  196.08   10.99
  -5   0  -1  180.31   11.20
   6   0   1    0.15    0.09
   6   0   1    0.10    0.09
   6   0   1   -0.03    0.15
   6   0   1    0.08    0.09
  -6   0  -1   -0.05    0.14
   7   0   1   -0.02    0.09
   7   0   1    0.18    0.11
   7   0   1    0.17    0.11
   8   0   1   -0.01    0.08
   8   0   1    0.10    0.12
   8   0   1    0.16    0.14
   8   0   1    0.14    0.05
   9   0   1   58.92    3.46
   9   0   1   61.98    3.60
   9   0   1   62.86    3.19
   9   0   1   60.89    3.42
   9   0   1   59.48    2.85
  10   0   1    0.05    0.08
  10   0   1    0.06    0.09
  10   0   1    0.00    0.16
  10   0   1   -0.01    0.14
  11   0   1   19.66    1.26
  11   0   1   19.68    1.17
  11   0   1   19.77    0.96
  12   0   1    0.05    0.07
  13   0   1    4.01    0.31
  13   0   1    4.69    0.31
  14   0   1    0.04    0.07
  15   0   1    0.41    0.07
  15  -1  -1    7.46    0.37
  15   1  -1    5.28    0.36
  14  -1  -1    1.15    0.13
  14   1  -1    1.17    0.14
  13   1  -1    2.14    0.21
  13   1  -1    2.02    0.20
  12   1  -1    8.29    0.44
  12   1  -1    7.94    0.54
  12   1  -1    8.96    0.51
  11  -1  -1    1.91    0.32
  11   1  -1    2.49    0.21
  11   1  -1    1.62    0.18
  11   1  -1    1.78    0.32
  10  -1  -1    3.48    0.41
  10   1  -1    4.27    0.24
  10   1  -1    4.22    0.31
  10   1  -1    3.96    0.38
  10   1  -1    4.41    0.25
  10   1  -1    4.09    0.44
   9  -1  -1   14.57    0.89
   9  -1  -1   13.44    0.76
   9  -1  -1   14.58    0.96
   9   1  -1   17.04    1.00
   9   1  -1   15.92    0.97
   9   1  -1   14.17    0.88
   8  -1  -1    0.53    0.13
   8  -1  -1    0.39    0.13
   8  -1  -1    0.67    0.18
   8   1  -1    0.71    0.16
   8   1  -1    0.39    0.15
   8   1  -1    0.56    0.15
   8   1  -1    0.67    0.08
   7  -1  -1   35.05    2.03
   7  -1  -1   35.08    2.14
   7  -1  -1   33.47    2.01
   7   1  -1   36.10    2.12
   7   1  -1   38.15    2.04
   7   1  -1   36.48    2.05
   7   1  -1   36.18    2.00
   6  -1  -1    0.75    0.25
   6  -1  -1    0.86    0.16
   6  -1  -1    0.95    0.16
   6  -1  -1    0.86    0.13
   6  -1  -1    0.82    0.24
   6   1  -1    0.71    0.21
   6   1  -1    1.01    0.15
   6   1  -1    0.92    0.14
  -6   1   1    0.68    0.23
   6   1  -1    0.91    0.14
   6   1  -1    1.01    0.15
   5  -1  -1   16.52    0.92
   5  -1  -1   13.97    1.07
   5  -1  -1   15.86    1.07
   5  -1  -1   16.95    0.99
   5  -1  -1   15.96    0.94
  -5  -1   1   17.11    1.04
  -5  -1   1   15.69    1.04
   5   1  -1   16.50    0.97
  -5   1   1   14.14    0.92
  -5   1   1   16.21    0.99
   5   1  -1   16.02    1.03
   5   1  -1   16.85    0.95
   5   1  -1   15.07    1.04
   5   1  -1   16.72    0.92
  -5   1   1   14.92    1.06
  -5   1   1   15.70    1.08
  -5   1   1   15.52    0.94
   4  -1  -1   72.37    4.15
  -4  -1   1   76.94    4.10
  -4  -1   1   75.36    4.10
   4  -1  -1   72.31    3.96
   4  -1  -1   74.13    4.13
   4  -1  -1   75.33    4.16
   4  -1  -1   73.14    3.92
   4   1  -1   74.57    3.98
  -4   1   1   77.75    4.14
   4   1  -1   70.94    4.08
   4   1  -1   65.74    4.14
   4   1  -1   75.71    3.90
  -4   1   1   69.45    4.09
  -4   1   1   72.21    4.16
   4   1  -1   71.28    4.10
  -4   1   1   72.40    3.92
   4   1  -1   63.07    3.90
   4   1  -1   71.93    4.13
  -4   1   1   77.04    4.15
  -3  -1   1    0.09    0.09
   3  -1  -1    0.12    0.13
   3  -1  -1    0.29    0.09
   3  -1  -1    0.26    0.09
  -3  -1   1    0.22    0.10
   3  -1  -1    0.36    0.13
   3   1  -1   -0.01    0.08
   3   1  -1   -0.01    0.06
  -3   1   1    0.25    0.13
  -3   1   1    0.24    0.09
   3   1  -1    0.13    0.06
  -3   1   1    0.19    0.12
   3   1  -1    0.25    0.07
  -3   1   1    0.37    0.09
  -3   1   1    0.05    0.05
   3   1  -1    0.12    0.11
   3   1  -1    0.19    0.07
   3   1  -1    0.28    0.07
   3   1  -1    0.15    0.07
   2  -1  -1  204.71   10.90
   2  -1  -1  211.30   11.25
   2  -1  -1  222.12   11.25
  -2  -1   1  217.97   11.31
   2  -1  -1  195.62   11.61
  -2  -1   1  224.14   11.28
   2  -1  -1  193.11   11.05
   2   1  -1  195.11   11.57
   2   1  -1  196.71   11.60
   2   1  -1  213.12   10.91
   2   1  -1  200.56   11.03
   2   1  -1  217.03   11.29
   2   1  -1  197.25   11.13
   2   1  -1  207.09   11.26
   2   1  -1  177.66   11.46
  -2   1   1  193.09   11.48
   2   1  -1  180.36   10.90
  -2   1   1  199.58   11.64
  -2   1   1  208.10   11.24
  -2   1   1  222.96   11.25
  -2   1   1  205.97   10.92
   1  -1  -1    0.35    0.08
  -1  -1   1    0.31    0.05
   1  -1  -1    0.15    0.08
   1  -1  -1    0.13    0.06
   1  -1  -1    0.36    0.06
  -1  -1   1    0.18    0.05
  -1   1   1    0.19    0.06
  -1   1   1    0.21    0.05
   1   1  -1    0.13    0.04
  -1   1   1    0.18    0.05
   1   1  -1    0.28    0.06
   1   1  -1    0.19    0.04
   1   1  -1    0.25    0.05
   1   1  -1    0.33    0.05
   1   1  -1    0.16    0.04
  -1   1   1    0.15    0.06
  -1   1   1    0.15    0.07
  -1   1   1    0.26    0.08
   1   1  -1    0.26    0.04
   1   1  -1    0.28    0.04
   1   1  -1    0.19    0.06
   1   1  -1    0.15    0.05
   0  -1   1   -0.07    0.03
   0  -1  -1   -0.04    0.03
   0  -1   1   -0.10    0.03
   0   1  -1   -0.07    0.02
   0   1  -1   -0.08    0.02
   0   1   1   -0.11    0.03
   0   1  -1   -0.08    0.03
   0   1  -1   -0.07    0.02
   0   1  -1   -0.06    0.03
   0   1  -1   -0.11    0.02
   0   1  -1   -0.06    0.02
   0   1   1   -0.02    0.03
   0   1   1   -0.08    0.03
   0   1   1   -0.06    0.02
   0   1  -1   -0.09    0.03
   0   1   1   -0.02    0.02
   0   1  -1   -0.09    0.03
   0   1   1   -0.11    0.02
   0   1   1   -0.03    0.02
   1  -1   1    0.42    0.06
   1  -1   1    0.53    0.08
  -1  -1  -1    0.47    0.05
  -1  -1  -1    0.52    0.05
   1   1   1    0.42    0.04
   1   1   1    0.41    0.04
   1   1   1    0.48    0.05
  -1   1  -1    0.46    0.06
   1   1   1    0.43    0.05
  -1   1  -1    0.59    0.08
   1   1   1    0.46    0.04
   1   1   1    0.38    0.04
   1   1   1    0.48    0.05
  -1   1  -1    0.42    0.06
   1   1   1    0.58    0.05
   2  -1   1   90.97    4.88
   2  -1   1   88.41    5.18
   2  -1   1   97.79    5.10
  -2  -1  -1   97.77    5.05
   2  -1   1   98.24    5.09
   2  -1   1   83.29    4.94
  -2  -1  -1   98.09    5.06
   2   1   1   83.91    4.87
   2   1   1   95.43    5.05
   2   1   1   93.44    4.84
  -2   1  -1   90.08    4.88
   2   1   1   95.34    5.05
   2   1   1   89.06    5.22
  -2   1  -1   89.57    5.18
   2   1   1   88.21    4.91
  -2   1  -1   98.56    5.09
  -2   1  -1   86.59    5.14
  -2   1  -1   96.56    5.09
   2   1   1   89.78    4.96
   2   1   1   87.25    4.86
   2   1   1   82.83    5.16
   3  -1   1  598.05   36.68
   3  -1   1  612.28   35.04
  -3  -1  -1  701.06   35.63
  -3  -1  -1  689.39   35.72
   3  -1   1  693.86   35.78
  -3   1  -1  618.86   36.71
   3   1   1  594.19   36.57
   3   1   1  660.59   35.59
  -3   1  -1  626.32   34.61
   3   1   1  679.42   34.51
   3   1   1  625.88   35.16
   3   1   1  669.78   36.65
  -3   1  -1  669.91   35.76
   3   1   1  666.01   35.73
  -3   1  -1  605.51   36.40
   3   1   1  590.03   34.50
  -3   1  -1  701.53   35.81
   4  -1   1   90.02    5.11
   4  -1   1   94.09    5.36
   4  -1   1   95.82    5.31
  -4  -1  -1   98.89    5.27
   4  -1   1   95.59    5.05
  -4  -1  -1   99.84    5.27
   4  -1   1   92.57    5.32
  -4   1  -1   96.55    5.36
   4   1   1   99.65    5.04
   4   1   1   96.20    5.26
   4   1   1   83.39    5.34
  -4   1  -1   97.21    5.31
  -4   1  -1   87.03    5.29
   4   1   1   81.44    5.03
  -4   1  -1  100.62    5.31
  -4   1  -1   89.80    5.05
   4   1   1   94.94    5.27
   4   1   1   97.01    5.14
   4   1   1   97.18    5.34
   5  -1   1    5.09    0.36
   5  -1   1    5.35    0.33
  -5  -1  -1    4.67    0.42
   5  -1   1    4.77    0.47
   5  -1   1    4.60    0.46
   5  -1   1    5.40    0.37
  -5  -1  -1    5.09    0.44
  -5   1  -1    4.67    0.44
   5   1   1    5.03    0.34
  -5   1  -1    4.97    0.36
  -5   1  -1    5.30    0.37
  -5   1  -1    4.29    0.31
   5   1   1    4.77    0.35
   5   1   1    4.24    0.42
  -5   1  -1    4.74    0.46
   5   1   1    4.72    0.33
   5   1   1    4.79    0.42
   6  -1   1   25.13    1.44
   6  -1   1   24.81    1.45
   6  -1   1   21.15    1.62
   6  -1   1   22.99    1.62
   6  -1   1   26.54    1.53
   6   1   1   28.01    1.51
   6   1   1   26.01    1.43
   6   1   1   26.96    1.47
  -6   1  -1   22.58    1.61
   7  -1   1   16.39    1.02
   7  -1   1   15.05    1.00
   7  -1   1   16.19    1.08
   7   1   1   18.53    1.03
   7   1   1   17.62    1.00
   7   1   1   17.22    1.04
   7   1   1   17.20    1.06
   8  -1   1    1.55    0.25
   8   1   1    2.05    0.15
   8   1   1    1.91    0.24
   8   1   1    1.97    0.14
   8   1   1    1.83    0.24
   8   1   1    1.73    0.18
   8   1   1    2.07    0.26
   9  -1   1    1.25    0.25
   9  -1   1    1.56    0.17
   9   1   1    1.81    0.18
   9   1   1    1.86    0.13
   9   1   1    1.67    0.26
   9   1   1    2.28    0.28
  10  -1   1   12.10    0.75
  10  -1   1   11.94    0.64
  10   1   1   12.31    0.75
  10   1   1   12.94    0.87
  11  -1   1    0.75    0.23
  11  -1   1    0.95    0.14
  11   1   1    0.87    0.26
  11   1   1    1.20    0.15
  11   1   1    1.05    0.14
  12   1   1   11.00    0.74
  12   1   1   13.13    0.70
  13   1   1    2.15    0.21
  13   1   1    2.10    0.19
  14  -1   1    0.03    0.07
  14   1   1    0.02    0.06
  14   1   1    0.09    0.07
  15  -1   1    0.05    0.05
  15  -2  -1    3.94    0.24
  14  -2  -1    1.83    0.15
  14   2  -1    1.61    0.14
  14   2  -1    1.23    0.14
  13   2  -1   12.78    0.71
  13   2  -1   11.90    0.75
  12   2  -1   10.56    0.69
  12   2  -1   11.67    0.66
  11   2  -1    2.11    0.20
  11   2  -1    2.29    0.23
  10   2  -1    0.73    0.12
  10   2  -1    0.67    0.13
  10   2  -1    0.54    0.19
   9  -2  -1    0.25    0.07
   9   2  -1    0.45    0.19
   9   2  -1    0.21    0.10
   9   2  -1    0.09    0.09
   9   2  -1    0.21    0.06
   9   2  -1    0.26    0.14
   8   2  -1    1.11    0.11
   8   2  -1    1.13    0.21
   8   2  -1    1.15    0.13
   8   2  -1    1.31    0.19
   8   2  -1    1.37    0.11
   8   2  -1    1.17    0.11
   8   2  -1    1.33    0.19
   8   2  -1    1.32    0.21
   7  -2  -1    6.02    0.47
   7  -2  -1    5.73    0.48
   7   2  -1    6.15    0.46
   7   2  -1    6.08    0.43
   7   2  -1    5.94    0.43
   7   2  -1    6.20    0.46
   6  -2  -1   19.36    1.18
   6  -2  -1   20.42    1.25
   6   2  -1   21.33    1.20
  -6   2   1   19.40    1.19
   6   2  -1   20.28    1.20
  -6   2   1   16.09    1.32
   6   2  -1   20.45    1.13
   6   2  -1   20.55    1.17
  -6   2   1   20.45    1.25
  -5  -2   1    4.15    0.36
   5  -2  -1    4.45    0.46
   5  -2  -1    3.85    0.47
   5  -2  -1    4.71    0.34
   5  -2  -1    3.97    0.28
   5  -2  -1    4.47    0.35
  -5  -2   1    3.84    0.37
   5   2  -1    4.13    0.36
   5   2  -1    4.69    0.30
   5   2  -1    4.19    0.31
   5   2  -1    4.69    0.31
   5   2  -1    3.95    0.37
  -5   2   1    5.37    0.32
  -5   2   1    4.55    0.35
  -5   2   1    4.17    0.44
   5   2  -1    3.58    0.29
  -5   2   1    4.71    0.36
   5   2  -1    4.54    0.33
  -5   2   1    4.43    0.46
   5   2  -1    4.46    0.33
   4  -2  -1  151.78    8.40
   4  -2  -1  162.24    8.78
  -4  -2   1  158.32    8.70
   4  -2  -1  161.29    8.92
  -4  -2   1  160.91    8.69
   4  -2  -1  159.38    8.80
   4  -2  -1  141.41    8.49
   4   2  -1  151.38    8.88
   4   2  -1  155.37    8.68
  -4   2   1  162.09    8.41
   4   2  -1  161.99    8.46
   4   2  -1  138.05    8.36
  -4   2   1  160.27    8.77
   4   2  -1  163.95    8.55
   4   2  -1  160.27    8.47
   4   2  -1  156.93    8.94
  -4   2   1  167.38    8.92
   4   2  -1  149.32    8.69
  -4   2   1  162.42    8.78
  -4   2   1  159.43    8.85
   3  -2  -1  127.13    7.46
   3  -2  -1  129.43    7.35
  -3  -2   1  131.23    7.25
  -3  -2   1  139.85    7.27
   3  -2  -1  143.49    7.35
   3  -2  -1  131.94    7.04
   3   2  -1  117.71    7.00
   3   2  -1  133.78    7.05
  -3   2   1  130.40    7.42
  -3   2   1  141.71    7.04
   3   2  -1  132.12    7.26
   3   2  -1  123.61    7.43
  -3   2   1  135.10    7.47
  -3   2   1  143.42    7.35
   3   2  -1  131.86    7.51
  -3   2   1  132.22    7.34
   3   2  -1  127.80    7.15
   3   2  -1  133.62    7.26
   3   2  -1  128.16    7.09
   3   2  -1  118.95    7.39
   2  -2  -1  743.58   39.86
   2  -2  -1  685.79   38.54
   2  -2  -1  630.20   40.85
   2  -2  -1  800.29   39.91
   2   2  -1  724.76   38.92
  -2   2   1  750.27   38.62
  -2   2   1  725.47   39.83
   2   2  -1  742.17   39.28
  -2   2   1  735.81   40.80
  -2   2   1  739.97   40.98
  -2   2   1  759.58   39.99
  -2   2   1  649.98   40.89
   2   2  -1  681.15   40.67
   2   2  -1  754.12   38.23
   1  -2  -1   96.19    4.86
   1  -2  -1   94.47    4.87
   1   2  -1   85.99    4.75
  -1   2   1   88.83    4.67
  -1   2   1   82.58    4.64
   1   2  -1   83.85    4.63
  -1   2   1   87.15    4.98
  -1   2   1   77.88    4.95
  -1   2   1   85.39    4.67
   1   2  -1   86.32    4.72
  -1   2   1   92.29    4.86
  -1   2   1   93.65    4.85
  -1   2   1   88.60    4.94
   1   2  -1   83.20    4.94
   0  -2  -1    6.24    0.34
   0  -2   1    5.58    0.34
   0  -2  -1    5.99    0.34
   0   2   1    5.28    0.32
   0   2  -1    5.58    0.33
   0   2  -1    5.22    0.31
   0   2  -1    4.87    0.31
   0   2   1    5.44    0.32
   0   2  -1    5.55    0.34
   0   2  -1    5.30    0.31
   0   2   1    5.46    0.32
   0   2  -1    4.97    0.35
   0   2  -1    5.20    0.32
   0   2  -1    4.90    0.31
   0   2   1    5.71    0.31
   0   2  -1    5.29    0.33
   0   2   1    5.92    0.35
   0   2   1    5.83    0.34
   0   2  -1    5.24    0.32
   0   2   1    5.52    0.32
   1  -2   1   71.53    3.66
   1   2   1   63.29    3.47
   1   2   1   64.54    3.70
  -1   2  -1   67.87    3.65
  -1   2  -1   67.33    3.50
   1   2   1   64.57    3.53
  -1   2  -1   70.24    3.66
   1   2   1   64.74    3.56
  -1   2  -1   62.53    3.50
  -1   2  -1   65.45    3.71
  -1   2  -1   64.69    3.71
  -1   2  -1   59.37    3.71
  -2  -2  -1  244.55   13.00
   2  -2   1  207.98   13.33
   2  -2   1  245.95   13.03
  -2  -2  -1  257.54   13.02
   2   2   1  227.56   13.37
  -2   2  -1  230.10   13.41
   2   2   1  240.96   13.38
  -2   2  -1  240.38   13.49
  -2   2  -1  247.19   13.03
   2   2   1  232.50   12.91
   2   2   1  244.81   13.01
   2   2   1  224.17   12.74
  -2   2  -1  204.68   13.33
   2   2   1  243.24   13.01
   2   2   1  241.33   12.60
  -2   2  -1  250.30   12.76
  -2   2  -1  245.54   13.02
   2   2   1  240.93   12.50
   2   2   1  232.14   12.59
   2   2   1  225.13   13.33
   3  -2   1  180.76    9.84
   3  -2   1  172.24   10.44
  -3  -2  -1  192.77   10.16
   3  -2   1  167.24    9.97
  -3  -2  -1  188.76   10.15
   3  -2   1  185.40   10.25
   3  -2   1  194.37   10.24
   3   2   1  189.21    9.92
   3   2   1  171.72   10.48
   3   2   1  182.14    9.91
   3   2   1  185.25   10.00
  -3   2  -1  192.19    9.84
   3   2   1  192.99   10.54
   3   2   1  205.78    9.91
  -3   2  -1  186.92   10.22
   3   2   1  184.55   10.15
   3   2   1  182.30   10.15
   3   2   1  161.50    9.86
  -3   2  -1  195.69   10.24
   3   2   1  182.89   10.41
  -3   2  -1  185.62   10.44
  -3   2  -1  181.89   10.38
   4  -2   1   77.94    4.71
   4  -2   1   78.76    4.96
  -4  -2  -1   90.45    4.86
   4  -2   1   84.26    4.95
  -4  -2  -1   92.79    4.85
   4  -2   1   88.52    4.94
   4  -2   1   84.68    4.68
  -4   2  -1   88.47    4.94
  -4   2  -1   90.48    4.93
   4   2   1   92.80    4.65
   4   2   1   91.40    4.76
  -4   2  -1   85.19    4.97
   4   2   1   89.39    4.86
  -4   2  -1   85.64    4.92
  -4   2  -1   88.53    4.69
   4   2   1   79.17    4.93
   4   2   1   87.86    4.85
   4   2   1   80.32    4.64
   4   2   1   94.36    4.93
   4   2   1   87.24    4.70
   5  -2   1   76.54    4.33
   5  -2   1   73.23    4.34
   5  -2   1   73.53    4.09
   5  -2   1   70.34    4.36
   5  -2   1   71.11    4.09
  -5  -2  -1   74.96    4.26
   5   2   1   66.93    4.04
  -5   2  -1   75.96    4.34
   5   2   1   74.68    4.26
   5   2   1   80.85    4.29
   5   2   1   79.05    4.10
  -5   2  -1   73.93    4.27
   5   2   1   79.03    4.16
   5   2   1   71.46    4.29
   5   2   1   73.86    4.24
   5   2   1   81.02    4.05
  -5   2  -1   81.56    4.34
  -5   2  -1   76.25    4.09
  -5   2  -1   74.07    4.35
   6  -2   1    2.97    0.46
   6  -2   1    3.84    0.34
   6  -2   1    4.05    0.34
  -6   2  -1    4.46    0.35
  -6   2  -1    3.28    0.42
  -6   2  -1    4.14    0.35
   6   2   1    3.85    0.32
   6   2   1    4.25    0.30
   6   2   1    4.14    0.34
   6   2   1    4.14    0.31
   7  -2   1   60.48    3.49
   7  -2   1   58.37    3.69
   7   2   1   64.60    3.54
   7   2   1   66.88    3.44
   7   2   1   62.28    3.64
   7   2   1   65.81    3.50
   8   2   1   15.03    0.73
   8   2   1   14.82    0.76
   8   2   1   14.52    0.90
   8   2   1   15.93    0.93
   8   2   1   16.53    0.98
   8   2   1   15.04    0.80
   8   2   1   15.07    0.98
   9  -2   1    1.90    0.16
   9   2   1    2.28    0.20
   9   2   1    2.11    0.28
   9   2   1    2.30    0.22
   9   2   1    1.72    0.26
  10   2   1    0.23    0.19
  10   2   1    0.63    0.14
  10   2   1    0.75    0.13
  11   2   1   25.19    1.35
  11   2   1   23.76    1.44
  12   2   1    1.18    0.16
  12   2   1    1.47    0.18
  13   2   1    5.25    0.34
  13   2   1    5.30    0.38
  14  -2   1    7.27    0.39
  14   2   1    5.91    0.41
  14   2   1    6.51    0.40
  14   3  -1   -0.03    0.06
  14   3  -1    0.09    0.06
  13   3  -1    0.28    0.11
  13   3  -1    0.24    0.09
  12   3  -1    8.32    0.50
  12   3  -1    7.79    0.53
  11   3  -1    3.19    0.26
  11   3  -1    2.84    0.27
  10  -3  -1    1.07    0.12
  10   3  -1    0.94    0.12
  10   3  -1    0.98    0.10
  10   3  -1    0.99    0.15
  10   3  -1    0.30    0.21
   9   3  -1    1.08    0.13
   9   3  -1    0.77    0.22
   9   3  -1    1.25    0.17
   9   3  -1    1.13    0.11
   8   3  -1    0.92    0.15
   8   3  -1    0.91    0.09
   8   3  -1    1.07    0.12
   8   3  -1    0.73    0.19
   8   3  -1    1.01    0.10
   8   3  -1    0.99    0.14
   8   3  -1    0.89    0.08
   7   3  -1   18.49    1.12
  -7   3   1   17.43    1.18
   7   3  -1   18.09    0.95
   7   3  -1   18.96    1.10
   7   3  -1   19.43    1.04
   7   3  -1   17.97    0.90
   7   3  -1   17.38    0.86
   7   3  -1   17.58    1.07
   6   3  -1    0.03    0.12
   6   3  -1    0.14    0.10
  -6   3   1    0.02    0.11
  -6   3   1    0.12    0.09
  -5  -3   1  119.63    7.65
   5  -3  -1  126.35    7.83
   5   3  -1  132.29    7.82
   5   3  -1  133.28    7.37
   5   3  -1  141.17    7.37
  -5   3   1  138.12    7.83
   5   3  -1  146.72    7.89
   5   3  -1  144.34    7.49
   5   3  -1  144.25    7.57
  -5   3   1  144.20    7.90
  -5   3   1  144.08    7.83
  -5   3   1  152.70    7.46
   5   3  -1  130.76    7.66
   4  -3  -1   70.62    4.17
  -4  -3   1   72.25    4.02
  -4  -3   1   67.27    4.02
   4  -3  -1   69.92    4.19
  -4   3   1   77.28    4.15
  -4   3   1   75.28    3.94
   4   3  -1   72.13    3.87
   4   3  -1   76.55    4.00
   4   3  -1   65.09    4.10
   4   3  -1   70.24    4.02
   4   3  -1   75.99    3.87
  -4   3   1   70.21    4.16
   4   3  -1   70.92    4.02
   4   3  -1   74.77    3.96
  -4   3   1   72.23    4.18
   4   3  -1   77.12    4.10
  -4   3   1   78.07    4.18
   4   3  -1   69.13    4.10
   3  -3  -1    0.10    0.08
   3  -3  -1    0.14    0.13
   3  -3  -1    0.02    0.05
   3  -3  -1    0.09    0.09
  -3   3   1   -0.04    0.09
   3   3  -1    0.07    0.05
   3   3  -1    0.03    0.06
  -3   3   1    0.10    0.08
  -3   3   1    0.12    0.09
   3   3  -1    0.06    0.06
  -3   3   1    0.18    0.06
   3   3  -1    0.01    0.06
  -3   3   1    0.16    0.08
   2  -3  -1   38.85    2.15
   2  -3  -1   36.26    2.15
  -2   3   1   37.93    2.14
   2   3  -1   37.78    1.98
  -2   3   1   37.95    2.15
  -2   3   1   39.83    2.02
   2   3  -1   36.76    2.05
  -2   3   1   37.55    2.14
   2   3  -1   36.14    2.12
  -2   3   1   39.01    2.13
  -2   3   1   31.70    2.12
   2   3  -1   37.73    2.04
  -2   3   1   32.12    2.00
   1  -3  -1   54.04    2.79
   1  -3  -1   49.28    2.78
   1   3  -1   48.20    2.82
   1   3  -1   46.83    2.63
   1   3  -1   47.57    2.69
  -1   3   1   46.71    2.80
  -1   3   1   46.83    2.64
  -1   3   1   43.72    2.66
  -1   3   1   51.76    2.79
  -1   3   1   51.00    2.78
  -1   3   1   47.91    2.64
  -1   3   1   50.78    2.81
   1   3  -1   50.60    2.69
  -1   3   1   50.99    2.83
  -1   3   1   52.06    2.65
   0  -3  -1    0.80    0.10
   0  -3  -1    0.54    0.08
   0  -3   1    0.95    0.11
   0  -3   1    0.50    0.08
   0   3   1    0.55    0.06
   0   3   1    0.76    0.09
   0   3   1    0.51    0.08
   0   3  -1    0.47    0.07
   0   3   1    0.68    0.07
   0   3   1    0.58    0.11
   0   3  -1    0.62    0.06
   0   3   1    0.53    0.08
   0   3  -1    0.86    0.10
   0   3  -1    0.51    0.08
   0   3  -1    0.57    0.06
   0   3   1    0.46    0.08
   0   3  -1    0.59    0.10
   0   3   1    0.64    0.07
   0   3   1    0.61    0.06
   0   3  -1    0.71    0.09
   0   3  -1    0.74    0.07
   1  -3   1   12.45    0.76
   1  -3   1   13.20    0.77
  -1   3  -1   12.35    0.76
  -1   3  -1   12.05    0.72
  -1   3  -1   12.35    0.69
   1   3   1   12.57    0.71
  -1   3  -1   12.07    0.69
   1   3   1   12.56    0.71
  -1   3  -1   11.62    0.69
   1   3   1   12.27    0.69
  -1   3  -1   12.09    0.76
  -1   3  -1   10.99    0.72
   1   3   1   12.16    0.75
  -1   3  -1   12.70    0.75
   2  -3   1   25.77    1.52
   2  -3   1   25.56    1.51
  -2   3  -1   26.65    1.40
  -2   3  -1   27.31    1.50
   2   3   1   25.57    1.38
   2   3   1   24.28    1.42
  -2   3  -1   25.42    1.50
  -2   3  -1   21.71    1.39
  -2   3  -1   23.59    1.47
   2   3   1   25.07    1.47
   2   3   1   24.86    1.40
  -2   3  -1   25.99    1.51
  -2   3  -1   26.79    1.48
   3  -3   1    5.96    0.49
   3  -3   1    4.92    0.40
   3  -3   1    5.86    0.50
   3  -3   1    4.96    0.39
  -3   3  -1    5.64    0.47
   3   3   1    6.62    0.40
  -3   3  -1    6.60    0.40
  -3   3  -1    5.99    0.42
   3   3   1    6.02    0.38
  -3   3  -1    6.18    0.41
   3   3   1    6.58    0.37
   3   3   1    5.66    0.38
  -3   3  -1    6.24    0.50
   4  -3   1   27.66    1.82
  -4  -3  -1   29.04    1.66
  -4  -3  -1   27.94    1.66
   4  -3   1   27.80    1.80
  -4   3  -1   29.61    1.72
  -4   3  -1   28.81    1.79
   4   3   1   28.95    1.66
   4   3   1   31.35    1.67
   4   3   1   29.49    1.64
   4   3   1   30.83    1.68
   4   3   1   29.25    1.58
   4   3   1   28.13    1.66
   4   3   1   28.05    1.67
   4   3   1   30.44    1.58
  -4   3  -1   29.83    1.73
  -4   3  -1   30.12    1.65
  -4   3  -1   27.99    1.81
  -5  -3  -1   25.35    1.73
   5  -3   1   25.58    1.90
   5   3   1   29.22    1.73
   5   3   1   27.75    1.63
   5   3   1   33.55    1.73
   5   3   1   27.45    1.73
  -5   3  -1   30.82    1.71
  -5   3  -1   31.18    1.76
  -5   3  -1   27.43    1.88
  -5   3  -1   33.74    1.81
   5   3   1   30.39    1.69
   5   3   1   32.68    1.74
   5   3   1   31.51    1.63
  -6   3  -1   10.86    0.75
   6   3   1   12.18    0.74
   6   3   1   12.96    0.70
   6   3   1   12.05    0.79
  -6   3  -1   11.40    0.77
   6   3   1   12.14    0.76
  -6   3  -1   12.11    0.81
  -7   3  -1    1.52    0.26
   7   3   1    1.94    0.18
   7   3   1    1.93    0.13
   7   3   1    2.35    0.26
   7   3   1    2.20    0.16
   7   3   1    2.38    0.20
   7   3   1    2.04    0.12
   7   3   1    2.25    0.21
   7   3   1    2.08    0.25
   8   3   1    0.38    0.10
   8   3   1    0.19    0.15
   8   3   1    0.29    0.10
   8   3   1    0.26    0.08
   8   3   1    0.28    0.08
   8   3   1    0.34    0.06
   8   3   1    0.87    0.18
   8   3   1    0.38    0.08
   9   3   1    7.78    0.54
   9   3   1    6.89    0.58
   9   3   1    7.20    0.38
   9   3   1    7.52    0.49
   9   3   1    7.08    0.44
   9   3   1    7.75    0.43
  10   3   1   11.88    0.74
  10   3   1   12.11    0.70
  11   3   1    4.60    0.34
  11   3   1    4.57    0.33
  12   3   1    0.38    0.10
  12   3   1    0.42    0.12
  13   3   1    7.54    0.46
  13   3   1    7.89    0.49
  14   3   1    1.30    0.13
  14   4  -1    3.38    0.23
  14   4  -1    3.84    0.25
  13   4  -1    0.55    0.10
  13   4  -1    0.54    0.09
  12   4  -1    0.06    0.08
  12   4  -1   -0.06    0.10
  11   4  -1    9.62    0.58
  11   4  -1   10.03    0.64
  10   4  -1   28.14    1.68
  10   4  -1   29.26    1.58
   9   4  -1    0.10    0.17
   9   4  -1    0.06    0.09
  -9   4   1    0.35    0.09
   9   4  -1    0.33    0.09
   9   4  -1    0.28    0.12
   8   4  -1    2.28    0.18
   8   4  -1    2.11    0.21
   8   4  -1    2.34    0.19
   8   4  -1    1.86    0.17
   8   4  -1    2.21    0.14
   8   4  -1    1.98    0.29
   7   4  -1    0.55    0.15
  -7   4   1    0.56    0.08
   7   4  -1    0.52    0.09
   7   4  -1    0.19    0.14
   7   4  -1    0.63    0.08
  -7   4   1    0.31    0.12
   7   4  -1    0.54    0.11
   7   4  -1    0.45    0.05
  -6   4   1   86.28    5.03
  -6   4   1   93.78    5.10
   6   4  -1   83.52    4.82
   5   4  -1    3.61    0.31
  -5   4   1    3.68    0.32
  -5   4   1    3.63    0.32
  -5   4   1    3.95    0.34
   5   4  -1    3.30    0.31
   4   4  -1    3.87    0.32
   4   4  -1    4.02    0.28
  -4   4   1    3.98    0.32
   4   4  -1    3.91    0.31
  -4   4   1    4.02    0.32
  -4   4   1    3.77    0.32
   4   4  -1    3.13    0.27
   3   4  -1    2.86    0.25
  -3   4   1    2.84    0.25
  -3   4   1    2.80    0.24
  -3   4   1    2.72    0.25
   3   4  -1    2.99    0.24
   3   4  -1    2.82    0.24
  -3   4   1    2.09    0.30
  -3   4   1    2.78    0.24
  -3   4   1    2.48    0.33
   3   4  -1    2.80    0.22
   2  -4  -1   44.52    2.65
   2  -4  -1   44.97    2.66
   2   4  -1   46.75    2.47
  -2   4   1   41.74    2.63
  -2   4   1   44.78    2.49
   2   4  -1   44.86    2.65
   2   4  -1   47.21    2.54
   2   4  -1   47.66    2.54
  -2   4   1   47.45    2.50
  -2   4   1   49.23    2.67
  -2   4   1   44.33    2.66
  -2   4   1   42.89    2.49
  -2   4   1   49.90    2.64
  -2   4   1   44.68    2.64
   1  -4  -1   39.22    2.28
   1  -4  -1   40.08    2.29
   1   4  -1   39.44    2.20
  -1   4   1   39.67    2.28
   1   4  -1   42.05    2.21
  -1   4   1   40.62    2.29
  -1   4   1   37.56    2.15
   1   4  -1   40.76    2.32
  -1   4   1   37.63    2.17
  -1   4   1   38.93    2.27
  -1   4   1   41.98    2.33
  -1   4   1   41.73    2.16
   1   4  -1   40.48    2.15
  -1   4   1   38.05    2.28
   0  -4   1    1.77    0.16
   0  -4   1    1.69    0.15
   0  -4  -1    1.72    0.15
   0  -4  -1    1.55    0.15
   0   4   1    1.65    0.14
   0   4  -1    1.92    0.18
   0   4   1    1.59    0.12
   0   4  -1    1.81    0.16
   0   4  -1    1.81    0.12
   0   4  -1    1.87    0.16
   0   4   1    1.80    0.12
   0   4  -1    1.82    0.21
   0   4   1    1.51    0.16
   0   4  -1    1.77    0.12
   0   4  -1    1.73    0.15
   0   4  -1    1.83    0.12
   0   4  -1    1.79    0.12
   0   4   1    1.58    0.14
   0   4   1    1.61    0.15
   0   4  -1    1.72    0.13
   0   4   1    1.57    0.20
   0   4   1    1.66    0.12
   0   4   1    1.68    0.12
   1  -4   1    7.93    0.56
   1  -4   1    7.76    0.55
  -1   4  -1    8.06    0.55
  -1   4  -1    8.40    0.56
   1   4   1    8.04    0.49
   1   4   1    8.14    0.50
  -1   4  -1    8.21    0.54
  -1   4  -1    7.80    0.49
  -1   4  -1    8.41    0.50
   1   4   1    8.68    0.55
  -1   4  -1    7.21    0.50
  -1   4  -1    8.36    0.48
  -1   4  -1    7.76    0.48
   1   4   1    8.71    0.51
   2  -4   1   10.75    0.77
   2  -4   1   11.76    0.79
  -2   4  -1   11.08    0.76
  -2   4  -1   11.72    0.69
   2   4   1   11.97    0.73
   2   4   1   11.99    0.67
  -2   4  -1   12.72    0.71
  -2   4  -1   11.95    0.75
  -2   4  -1   10.47    0.70
  -2   4  -1   11.43    0.78
   2   4   1   11.54    0.69
  -2   4  -1    9.87    0.66
   2   4   1   11.46    0.70
  -2   4  -1   11.87    0.68
  -3   4  -1    0.07    0.14
   3   4   1    0.08    0.09
  -4   4  -1   64.68    3.48
   4   4   1   53.92    3.42
  -4   4  -1   60.82    3.47
   4   4   1   58.27    3.34
  -4   4  -1   61.19    3.29
   4   4   1   62.61    3.24
   4   4   1   58.85    3.30
  -5   4  -1   20.98    1.21
   5   4   1   19.81    1.19
  -5   4  -1   20.59    1.27
   5   4   1   20.34    1.23
  -5   4  -1   19.56    1.24
  -6   4  -1    0.12    0.08
  -6   4  -1    0.13    0.10
   6   4   1    0.09    0.10
   6   4   1    0.09    0.08
   6   4   1    0.10    0.09
  -6   4  -1    0.09    0.11
   6   4   1    0.11    0.06
   6   4   1    0.04    0.04
   6   4   1    0.06    0.03
   7   4   1    0.18    0.04
   7   4   1    0.29    0.10
   7   4   1    0.16    0.06
   7   4   1    0.36    0.08
   7   4   1    0.19    0.04
  -7   4  -1    0.36    0.14
   7   4   1    0.12    0.12
   7   4   1    0.18    0.04
   7   4   1    0.15    0.07
   7   4   1    0.08    0.04
   8   4   1    0.38    0.09
   8   4   1    0.34    0.09
   8   4   1    0.19    0.15
   8   4   1    0.38    0.06
   8   4   1    0.36    0.09
   9   4   1   11.15    0.48
   9   4   1    9.94    0.53
   9   4   1    8.97    0.56
  -9   4  -1    8.44    0.54
   9   4   1    8.92    0.60
  10   4   1    1.39    0.19
  10   4   1    1.35    0.15
  11   4   1    4.88    0.36
  11   4   1    5.07    0.34
  12   4   1    0.08    0.07
  12   4   1    0.00    0.08
  13   4   1    1.03    0.15
  13   4   1    0.60    0.09
  14   4   1    0.95    0.11
  13   5  -1   -0.08    0.05
  13   5  -1    0.06    0.07
  12   5  -1    4.95    0.32
  12   5  -1    5.15    0.35
  11   5  -1    0.18    0.12
  11   5  -1    0.16    0.11
  10   5  -1    2.24    0.19
  10   5  -1    2.11    0.21
   9   5  -1    6.21    0.40
   9   5  -1    6.40    0.36
   9   5  -1    5.72    0.53
   9   5  -1    5.93    0.42
   8   5  -1    5.66    0.37
  -8   5   1    4.46    0.49
   8   5  -1    6.47    0.36
   8   5  -1    5.94    0.40
   8   5  -1    6.17    0.29
   8   5  -1    5.05    0.49
   7   5  -1   17.77    1.08
  -7   5   1   15.64    1.04
   7   5  -1   20.06    1.16
   7   5  -1   17.23    1.15
   7   5  -1   19.98    0.96
  -7   5   1   18.81    0.99
   7   5  -1   18.76    1.17
   7   5  -1   17.76    1.01
   7   5  -1   17.70    0.86
   6   5  -1    0.02    0.02
  -6   5   1    0.10    0.05
   6   5  -1    0.00    0.05
   6   5  -1    0.01    0.08
  -6   5   1   -0.01    0.06
   6   5  -1    0.02    0.05
   6   5  -1    0.13    0.06
   6   5  -1   -0.02    0.06
   6   5  -1    0.01    0.10
   5   5  -1   31.53    1.57
   5   5  -1   28.76    1.77
  -5   5   1   32.67    1.87
   5   5  -1   30.44    1.72
  -5   5   1   27.94    1.62
   5   5  -1   30.57    1.78
  -5   5   1   32.47    1.79
  -5   5   1   31.60    1.77
   4   5  -1   15.38    0.95
  -4   5   1   16.22    0.96
   4   5  -1   13.30    0.94
   4   5  -1   15.97    0.90
   4   5  -1   15.34    0.95
  -4   5   1   15.60    1.00
  -4   5   1   15.66    0.97
  -4   5   1   15.48    0.94
   3   5  -1    2.86    0.22
  -3   5   1    2.99    0.25
   3   5  -1    2.87    0.26
  -3   5   1    3.32    0.27
  -3   5   1    2.66    0.26
   3   5  -1    2.51    0.26
   3   5  -1    2.75    0.26
  -3   5   1    3.02    0.30
  -2   5   1   11.22    0.70
   2   5  -1   11.32    0.75
  -2   5   1   10.80    0.70
   2   5  -1   10.92    0.67
  -2   5   1   11.53    0.67
   2   5  -1   11.17    0.71
  -2   5   1   11.83    0.76
   2   5  -1   10.70    0.69
   1  -5  -1    5.03    0.44
  -1   5   1    5.83    0.39
  -1   5   1    6.58    0.37
  -1   5   1    5.34    0.42
  -1   5   1    6.17    0.39
   1   5  -1    5.81    0.39
  -1   5   1    5.94    0.37
  -1   5   1    6.51    0.47
  -1   5   1    5.87    0.41
   1   5  -1    6.32    0.47
   1   5  -1    6.33    0.39
   1   5  -1    6.75    0.44
   0  -5   1    6.82    0.47
   0   5  -1    7.97    0.57
   0   5  -1    7.19    0.47
   0   5   1    8.45    0.51
   0   5  -1    8.39    0.46
   0   5  -1    8.34    0.44
   0   5  -1    7.71    0.47
   0   5  -1    8.59    0.46
   0   5   1    8.62    0.58
   0   5  -1    7.91    0.50
   0   5  -1    7.85    0.44
  -1   5  -1    5.88    0.45
  -1   5  -1    6.42    0.39
  -1   5  -1    6.89    0.41
   1   5   1    6.14    0.44
  -1   5  -1    6.71    0.50
  -1   5  -1    5.90    0.42
   1   5   1    6.81    0.49
   1   5   1    6.13    0.41
   1   5   1    6.45    0.43
  -1   5  -1    6.05    0.41
  -1   5  -1    6.93    0.40
  -2   5  -1   14.54    0.89
  -2   5  -1   16.12    0.88
   2   5   1   14.58    0.90
   2   5   1   14.74    0.87
  -2   5  -1   15.63    0.91
   2   5   1   15.54    0.96
  -2   5  -1   15.05    0.97
   2   5   1   13.93    0.89
  -3   5  -1    0.37    0.10
   3   5   1    0.20    0.08
  -3   5  -1    0.42    0.12
   3   5   1    0.29    0.09
  -3   5  -1    0.31    0.09
  -3   5  -1    0.36    0.13
   3   5   1    0.20    0.11
   3   5   1    0.28    0.11
  -4   5  -1    2.77    0.27
   4   5   1    2.99    0.27
  -4   5  -1    2.91    0.27
   4   5   1    2.57    0.26
   4   5   1    2.97    0.25
   4   5   1    2.50    0.24
  -4   5  -1    2.76    0.27
  -4   5  -1    2.56    0.30
  -5   5  -1    0.17    0.12
   5   5   1    0.14    0.10
  -5   5  -1    0.31    0.07
  -5   5  -1    0.14    0.13
  -5   5  -1    0.20    0.12
   5   5   1    0.29    0.07
   5   5   1    0.31    0.06
   6   5   1    1.14    0.13
  -6   5  -1    1.48    0.24
   6   5   1    1.22    0.15
   6   5   1    1.10    0.12
   6   5   1    1.20    0.11
   6   5   1    1.00    0.13
   6   5   1    0.85    0.18
   6   5   1    0.93    0.07
   6   5   1    1.09    0.11
  -6   5  -1    1.12    0.12
  -6   5  -1    1.42    0.13
  -7   5  -1    0.32    0.17
  -7   5  -1    0.40    0.09
   7   5   1    0.34    0.11
   7   5   1    0.26    0.04
  -7   5  -1    0.32    0.09
   7   5   1    0.29    0.07
   7   5   1    0.23    0.08
   7   5   1    0.27    0.09
  -8   5  -1   13.68    0.92
   8   5   1   17.11    0.84
   8   5   1   16.37    0.75
   8   5   1   15.30    0.89
   8   5   1   16.41    0.96
   9   5   1    1.98    0.23
   9   5   1    1.90    0.16
   9   5   1    2.01    0.17
  10   5   1    1.41    0.18
  10   5   1    1.48    0.19
  11   5   1    1.70    0.18
  11   5   1    1.45    0.15
  12   5   1    6.94    0.43
  12   5   1    6.00    0.39
  13   5   1    0.61    0.12
  13   6  -1    0.18    0.07
 -13   6   1    0.09    0.06
  12   6  -1    1.20    0.12
  12   6  -1    1.18    0.16
  11   6  -1    4.10    0.32
  11   6  -1    4.11    0.28
  10   6  -1    2.34    0.20
  10   6  -1    2.10    0.21
   9   6  -1    5.27    0.40
   9   6  -1    5.31    0.37
   9   6  -1    5.65    0.34
   8   6  -1    0.10    0.08
  -8   6   1    0.19    0.14
   8   6  -1    0.20    0.08
   8   6  -1    0.38    0.10
   8   6  -1    0.21    0.09
  -8   6   1    0.20    0.07
  -8   6   1   -0.01    0.08
   7   6  -1    0.07    0.06
   7   6  -1    0.14    0.09
   7   6  -1    0.10    0.10
   7   6  -1    0.19    0.07
  -7   6   1    0.08    0.08
  -7   6   1    0.04    0.12
   6   6  -1    1.45    0.25
  -6   6   1    1.78    0.29
  -6   6   1    1.86    0.14
   6   6  -1    1.88    0.18
   6   6  -1    1.74    0.16
   6   6  -1    2.14    0.17
   6   6  -1    2.08    0.18
  -6   6   1    1.92    0.19
  -5   6   1    0.36    0.10
   5   6  -1    0.30    0.06
   5   6  -1    0.40    0.09
   5   6  -1    0.58    0.10
  -5   6   1    0.36    0.08
   5   6  -1    0.19    0.05
   5   6  -1    0.12    0.13
   5   6  -1    0.27    0.08
   5   6  -1    0.35    0.08
  -5   6   1    0.20    0.12
  -4   6   1    0.19    0.06
   4   6  -1    0.17    0.09
   4   6  -1    0.18    0.07
  -4   6   1    0.18    0.07
  -4   6   1    0.39    0.05
  -4   6   1    0.08    0.10
   4   6  -1    0.12    0.07
  -4   6   1    0.25    0.12
   4   6  -1    0.23    0.11
   4   6  -1    0.21    0.08
   4   6  -1    0.15    0.06
   4   6  -1    0.29    0.13
   4   6  -1    0.19    0.06
  -4   6   1    0.26    0.11
   4   6  -1    0.12    0.10
   4   6  -1    0.21    0.08
  -3   6   1    1.72    0.15
  -3   6   1    1.40    0.16
  -3   6   1    1.67    0.20
  -3   6   1    1.61    0.16
  -3   6   1    1.69    0.12
   3   6  -1    1.58    0.22
  -3   6   1    1.66    0.12
  -3   6   1    1.63    0.20
   3   6  -1    1.76    0.21
   3   6  -1    1.79    0.23
   3   6  -1    1.58    0.19
  -3   6   1    1.89    0.24
   2   6  -1    1.41    0.22
  -2   6   1    1.69    0.16
   2   6  -1    1.37    0.19
   2   6  -1    1.41    0.18
  -2   6   1    1.63    0.24
   2   6  -1    1.18    0.17
  -2   6   1    1.36    0.20
  -2   6   1    1.95    0.18
   1   6  -1    0.12    0.12
  -1   6   1    0.03    0.09
  -1   6   1    0.18    0.10
  -1   6   1    0.13    0.05
  -1   6   1    0.12    0.05
   1   6  -1    0.12    0.08
  -1   6   1    0.15    0.05
   0   6  -1    3.52    0.28
   0   6   1    3.06    0.28
   0   6  -1    3.90    0.36
   0   6   1    3.78    0.36
  -1   6  -1    0.92    0.10
  -1   6  -1    0.82    0.09
   1   6   1    0.91    0.18
  -1   6  -1    1.09    0.19
   1   6   1    0.78    0.14
  -1   6  -1    0.98    0.16
  -1   6  -1    0.93    0.10
  -1   6  -1    0.76    0.10
   2   6   1    3.76    0.35
   2   6   1    3.31    0.30
   2   6   1    3.39    0.29
  -2   6  -1    3.56    0.31
  -2   6  -1    3.88    0.28
  -2   6  -1    3.63    0.35
   2   6   1    3.29    0.29
  -2   6  -1    3.94    0.28
   3   6   1    2.53    0.26
  -3   6  -1    2.27    0.27
   3   6   1    2.57    0.24
   3   6   1    2.30    0.26
  -3   6  -1    2.29    0.15
   3   6   1    2.81    0.20
  -3   6  -1    2.34    0.24
  -3   6  -1    2.74    0.25
   3   6   1    2.23    0.17
  -3   6  -1    2.25    0.15
  -3   6  -1    2.30    0.17
   3   6   1    2.51    0.25
  -3   6  -1    2.18    0.18
   4   6   1    5.96    0.48
  -4   6  -1    7.28    0.55
  -4   6  -1    6.82    0.40
   4   6   1    7.12    0.47
   4   6   1    6.43    0.41
  -4   6  -1    7.38    0.50
  -4   6  -1    7.02    0.50
   4   6   1    7.13    0.46
   4   6   1    5.99    0.39
  -4   6  -1    7.45    0.51
   4   6   1    7.10    0.39
  -4   6  -1    6.81    0.35
  -4   6  -1    6.58    0.42
   4   6   1    6.20    0.40
   4   6   1    6.32    0.43
  -4   6  -1    6.90    0.36
   5   6   1    6.10    0.39
   5   6   1    7.04    0.45
   5   6   1    6.70    0.43
  -5   6  -1    6.37    0.34
  -5   6  -1    6.70    0.54
   5   6   1    6.86    0.37
   5   6   1    6.09    0.38
   5   6   1    6.12    0.39
  -5   6  -1    6.50    0.42
   6   6   1   13.37    0.81
  -6   6  -1   13.94    0.72
  -6   6  -1   13.82    0.92
   6   6   1   15.23    0.76
  -6   6  -1   13.25    0.95
  -6   6  -1   14.02    0.94
   6   6   1   13.52    0.79
  -6   6  -1   13.19    0.96
  -6   6  -1   13.32    0.83
   6   6   1   14.30    0.85
   6   6   1   15.60    0.90
  -7   6  -1   17.57    1.12
   7   6   1   18.15    1.07
   7   6   1   19.68    1.15
   7   6   1   21.29    1.02
   7   6   1   21.67    1.23
  -7   6  -1   16.88    1.25
  -7   6  -1   18.66    1.24
   8   6   1   17.99    1.05
  -8   6  -1   16.84    1.14
   8   6   1   18.22    0.92
  -8   6  -1   16.43    1.01
  -8   6  -1   17.34    0.89
   8   6   1   16.65    0.97
   9   6   1    2.51    0.19
   9   6   1    2.33    0.22
   9   6   1    2.28    0.20
  10   6   1    7.51    0.50
  11   6   1    2.82    0.26
  11   6   1    2.55    0.20
  12   6   1    0.02    0.11
 -13   6  -1   -0.03    0.05
  13   6   1   -0.01    0.06
 -12   7   1    4.65    0.34
  11   7  -1    3.89    0.29
 -11   7   1    3.78    0.30
  11   7  -1    4.18    0.27
 -10   7   1    6.43    0.47
  10   7  -1    6.26    0.40
  10   7  -1    6.54    0.43
   9   7  -1    1.25    0.13
   9   7  -1    1.11    0.14
   9   7  -1    1.00    0.15
  -8   7   1    1.30    0.15
   8   7  -1    1.56    0.21
   8   7  -1    1.27    0.15
   8   7  -1    1.72    0.18
  -7   7   1    0.12    0.09
   7   7  -1    0.01    0.09
   7   7  -1    0.15    0.07
   7   7  -1    0.02    0.06
   7   7  -1    0.07    0.10
  -7   7   1    0.08    0.06
   7   7  -1    0.07    0.07
  -7   7   1   -0.13    0.19
  -6   7   1    0.07    0.07
   6   7  -1    0.13    0.08
   6   7  -1    0.11    0.07
  -6   7   1    0.03    0.11
   6   7  -1    0.09    0.07
   6   7  -1    0.06    0.08
   6   7  -1   -0.10    0.08
   6   7  -1    0.01    0.11
  -6   7   1    0.01    0.17
  -6   7   1    0.06    0.07
   6   7  -1    0.04    0.07
  -5   7   1    6.73    0.47
   5   7  -1    5.10    0.48
   5   7  -1    6.34    0.42
   5   7  -1    6.36    0.40
   5   7  -1    6.62    0.44
   5   7  -1    6.94    0.38
  -5   7   1    6.43    0.42
   5   7  -1    6.15    0.39
   5   7  -1    6.58    0.40
  -5   7   1    6.03    0.54
  -5   7   1    5.83    0.55
  -4   7   1   91.47    5.15
   4   7  -1   91.46    4.68
   4   7  -1   95.26    5.64
   4   7  -1   91.06    5.13
   4   7  -1   89.64    4.78
  -4   7   1   93.75    5.05
   4   7  -1   93.08    4.90
   4   7  -1   89.43    5.24
  -4   7   1   96.48    4.30
  -4   7   1   91.83    5.65
   3   7  -1    3.26    0.26
  -3   7   1    3.35    0.27
  -3   7   1    3.35    0.28
   3   7  -1    3.35    0.22
   3   7  -1    3.41    0.25
   3   7  -1    3.30    0.25
  -3   7   1    4.21    0.26
  -3   7   1    3.48    0.20
  -3   7   1    3.83    0.24
   3   7  -1    3.38    0.24
  -3   7   1    4.27    0.42
  -3   7   1    3.54    0.36
   3   7  -1    3.47    0.26
  -2   7   1    6.65    0.41
   2   7  -1    6.25    0.39
   2   7  -1    5.62    0.44
   2   7  -1    5.99    0.35
   2   7  -1    6.24    0.38
   2   7  -1    6.14    0.41
  -2   7   1    6.58    0.49
   2   7  -1    6.33    0.40
  -2   7   1    6.60    0.44
  -2   7   1    6.78    0.32
   2   7  -1    6.35    0.43
   2   7  -1    6.48    0.40
  -2   7   1    6.68    0.39
   1   7  -1    0.24    0.12
   1   7  -1    0.30    0.07
   1   7  -1    0.36    0.09
   1   7  -1    0.39    0.07
   1   7  -1    0.24    0.10
  -1   7   1    0.53    0.09
   1   7  -1    0.39    0.08
   1   7  -1    0.34    0.08
  -1   7   1    0.43    0.08
  -1   7   1    0.23    0.10
   1   7  -1    0.26    0.03
  -1   7   1    0.36    0.07
  -1   7   1    0.33    0.04
   1   7  -1    0.33    0.08
  -1   7   1    0.40    0.07
   0   7  -1    1.07    0.12
   0   7  -1    0.76    0.06
   0   7  -1    0.81    0.11
   0   7  -1    0.85    0.19
   0   7   1    0.91    0.11
   0   7  -1    0.60    0.14
   0   7   1    0.83    0.06
   0   7  -1    0.77    0.12
   0   7   1    0.83    0.10
   0   7  -1    0.80    0.10
   0   7   1    0.82    0.14
   0   7   1    0.85    0.11
   0   7   1    0.89    0.10
   1   7   1    7.48    0.42
   1   7   1    7.41    0.42
  -1   7  -1    7.29    0.43
   1   7   1    6.39    0.39
  -1   7  -1    6.95    0.50
   1   7   1    7.24    0.48
  -1   7  -1    7.04    0.35
  -1   7  -1    6.39    0.47
   1   7   1    6.50    0.49
  -1   7  -1    7.36    0.42
   1   7   1    7.46    0.45
  -1   7  -1    7.13    0.44
  -2   7  -1    8.04    0.61
  -2   7  -1    7.03    0.35
  -2   7  -1    7.42    0.35
   2   7   1    6.86    0.49
   2   7   1    7.25    0.42
   2   7   1    6.73    0.41
  -2   7  -1    6.73    0.48
  -2   7  -1    7.11    0.44
  -2   7  -1    7.92    0.42
   2   7   1    7.00    0.44
   2   7   1    6.86    0.48
   2   7   1    6.06    0.43
   2   7   1    6.75    0.39
  -2   7  -1    6.72    0.51
   3   7   1    6.50    0.48
   3   7   1    6.40    0.43
  -3   7  -1    6.80    0.34
  -3   7  -1    6.91    0.44
   3   7   1    6.73    0.40
   3   7   1    6.85    0.42
  -3   7  -1    6.26    0.46
   3   7   1    6.76    0.41
   3   7   1    6.39    0.41
  -3   7  -1    6.84    0.40
   3   7   1    7.20    0.46
   3   7   1    6.75    0.38
   3   7   1    6.38    0.41
  -3   7  -1    6.35    0.51
   4   7   1    6.12    0.36
   4   7   1    6.03    0.39
   4   7   1    5.65    0.45
  -4   7  -1    6.53    0.42
   4   7   1    5.57    0.40
  -4   7  -1    5.80    0.49
   4   7   1    6.14    0.38
   4   7   1    6.83    0.44
  -4   7  -1    6.91    0.33
   4   7   1    6.21    0.39
  -4   7  -1    6.16    0.38
   4   7   1    5.86    0.37
  -4   7  -1    6.31    0.44
   4   7   1    6.22    0.40
  -5   7  -1   10.89    0.64
   5   7   1    9.33    0.59
  -5   7  -1   10.51    0.78
  -5   7  -1   10.80    0.52
   5   7   1   10.05    0.62
  -5   7  -1   10.71    0.75
   5   7   1   10.77    0.58
   5   7   1   11.15    0.69
   5   7   1    9.76    0.61
  -5   7  -1   11.21    0.71
   5   7   1   10.15    0.65
   6   7   1    0.64    0.10
   6   7   1    0.62    0.09
   6   7   1    0.75    0.11
   6   7   1    0.54    0.09
  -6   7  -1    0.54    0.11
  -6   7  -1    0.52    0.10
  -6   7  -1    0.29    0.16
   6   7   1    0.69    0.11
   6   7   1    0.52    0.11
  -7   7  -1    4.57    0.49
   7   7   1    6.29    0.36
   7   7   1    5.64    0.41
   7   7   1    5.39    0.36
   7   7   1    6.29    0.42
  -7   7  -1    5.41    0.39
   8   7   1    2.37    0.19
   8   7   1    3.01    0.26
  -8   7  -1    2.52    0.21
   8   7   1    2.11    0.22
   9   7   1    7.13    0.45
  -9   7  -1    6.30    0.43
   9   7   1    5.98    0.40
   9   7   1    6.92    0.39
 -10   7  -1   10.07    0.70
  10   7   1   10.59    0.65
 -11   7  -1    5.34    0.38
 -12   7  -1    3.07    0.23
  10   8  -1    0.19    0.09
 -10   8   1    0.13    0.10
   9   8  -1    0.40    0.10
  -9   8   1    0.29    0.09
   9   8  -1    0.28    0.10
   8   8  -1    0.61    0.11
   8   8  -1    0.62    0.10
  -8   8   1    0.50    0.13
   8   8  -1    0.53    0.09
  -8   8   1    0.70    0.10
  -7   8   1    8.52    0.55
   7   8  -1    8.49    0.53
   7   8  -1    9.00    0.51
   7   8  -1    8.94    0.58
   7   8  -1    9.02    0.59
  -7   8   1    9.03    0.46
  -7   8   1    9.05    0.62
   6   8  -1    0.15    0.10
   6   8  -1    0.28    0.07
  -6   8   1    0.19    0.12
  -6   8   1    0.31    0.11
  -6   8   1    0.20    0.06
   6   8  -1    0.19    0.08
   6   8  -1    0.46    0.10
   6   8  -1    0.19    0.07
   6   8  -1    0.23    0.07
   6   8  -1    0.14    0.09
  -5   8   1    6.82    0.62
   5   8  -1    7.04    0.47
  -5   8   1    7.54    0.53
  -5   8   1    7.26    0.48
   5   8  -1    7.37    0.45
   5   8  -1    7.80    0.50
  -5   8   1    6.63    0.44
   5   8  -1    7.12    0.44
   5   8  -1    7.32    0.45
   5   8  -1    7.43    0.42
   4   8  -1    3.44    0.25
   4   8  -1    3.53    0.27
   4   8  -1    3.38    0.24
  -4   8   1    2.77    0.35
   4   8  -1    3.47    0.27
   4   8  -1    3.44    0.23
   4   8  -1    3.69    0.26
  -4   8   1    3.24    0.28
  -4   8   1    3.10    0.39
  -4   8   1    3.64    0.27
   3   8  -1   -0.04    0.06
  -3   8   1    0.15    0.05
  -3   8   1    0.04    0.06
   3   8  -1    0.04    0.07
  -3   8   1    0.04    0.11
   3   8  -1   -0.04    0.07
   3   8  -1   -0.02    0.08
   3   8  -1   -0.04    0.07
   3   8  -1    0.06    0.08
  -3   8   1    0.06    0.10
   3   8  -1   -0.03    0.08
  -2   8   1    6.63    0.47
  -2   8   1    6.18    0.33
   2   8  -1    6.51    0.41
   2   8  -1    6.12    0.42
  -2   8   1    6.98    0.61
   2   8  -1    6.85    0.41
   2   8  -1    6.62    0.40
   2   8  -1    6.38    0.45
  -2   8   1    6.46    0.43
  -2   8   1    7.28    0.41
  -2   8   1    5.63    0.50
  -1   8   1    0.02    0.05
  -1   8   1   -0.06    0.09
   1   8  -1    0.00    0.07
  -1   8   1    0.08    0.03
   1   8  -1    0.09    0.09
   1   8  -1    0.07    0.08
   1   8  -1    0.09    0.09
  -1   8   1    0.12    0.09
  -1   8   1    0.09    0.09
  -1   8   1    0.39    0.19
   0   8  -1    0.59    0.10
   0   8  -1    0.53    0.17
   0   8   1    0.59    0.12
   0   8  -1    0.62    0.09
   0   8   1    0.19    0.13
   0   8  -1    0.65    0.10
   0   8  -1    0.41    0.10
   0   8   1    0.64    0.11
   0   8  -1    0.46    0.04
   0   8   1    0.65    0.09
   0   8   1    0.48    0.09
  -1   8  -1   26.18    1.68
  -1   8  -1   26.14    1.26
  -1   8  -1   28.32    1.44
   1   8   1   27.22    1.46
   1   8   1   27.64    1.44
   1   8   1   26.41    1.50
   1   8   1   26.78    1.68
   1   8   1   26.33    1.53
  -1   8  -1   26.68    1.54
   2   8   1    1.56    0.18
  -2   8  -1    1.65    0.16
  -2   8  -1    1.56    0.17
   2   8   1    1.52    0.15
   2   8   1    1.37    0.14
   2   8   1    1.41    0.16
   2   8   1    1.61    0.18
   2   8   1    1.58    0.17
  -2   8  -1    1.67    0.11
  -2   8  -1    1.66    0.18
  -2   8  -1    1.80    0.16
  -3   8  -1    0.14    0.09
   3   8   1    0.19    0.09
  -3   8  -1    0.14    0.14
  -3   8  -1    0.12    0.06
   3   8   1    0.02    0.07
  -3   8  -1    0.16    0.07
   3   8   1    0.16    0.08
  -3   8  -1   -0.04    0.07
  -3   8  -1    0.05    0.07
   3   8   1    0.06    0.08
   3   8   1    0.10    0.09
  -3   8  -1   -0.02    0.05
   3   8   1    0.06    0.05
   4   8   1    6.97    0.44
  -4   8  -1    7.21    0.51
   4   8   1    7.59    0.46
   4   8   1    7.20    0.45
  -4   8  -1    7.40    0.48
   4   8   1    7.37    0.42
   4   8   1    6.94    0.47
  -4   8  -1    6.35    0.61
   4   8   1    7.51    0.44
   4   8   1    8.10    0.51
   5   8   1   25.03    1.41
  -5   8  -1   24.59    1.57
   5   8   1   22.94    1.32
   5   8   1   25.83    1.29
  -5   8  -1   24.51    1.43
   5   8   1   24.04    1.35
   5   8   1   26.56    1.55
   5   8   1   23.83    1.44
  -6   8  -1    1.27    0.18
  -6   8  -1    1.79    0.21
   6   8   1    0.93    0.14
   6   8   1    1.38    0.15
   6   8   1    0.93    0.16
   6   8   1    1.13    0.14
  -7   8  -1    2.54    0.21
  -7   8  -1    2.55    0.25
   7   8   1    2.21    0.18
   7   8   1    2.12    0.22
   7   8   1    2.14    0.19
  -7   8  -1    2.36    0.17
   7   8   1    2.33    0.21
  -8   8  -1   -0.22    0.09
   8   8   1    0.04    0.09
   8   8   1    0.18    0.09
   8   8   1    0.07    0.06
  -8   8  -1    0.11    0.07
  -9   8  -1   22.88    1.59
   9   8   1   27.89    1.49
 -10   8  -1    3.12    0.27
  10   8   1    3.52    0.25
  11   8   1    1.52    0.14
 -11   8  -1    1.31    0.13
  10   9  -1    0.11    0.06
 -10   9   1    0.05    0.05
  -9   9   1    4.10    0.32
   9   9  -1    4.94    0.31
   8   9  -1    1.95    0.20
  -8   9   1    1.94    0.16
   8   9  -1    1.99    0.18
  -8   9   1    2.17    0.21
   7   9  -1   16.59    0.87
  -7   9   1   17.24    1.07
  -7   9   1   16.16    0.96
   7   9  -1   15.22    0.91
   7   9  -1   17.09    0.99
  -6   9   1    1.26    0.15
  -6   9   1    1.33    0.15
   6   9  -1    1.09    0.12
   6   9  -1    1.10    0.14
   6   9  -1    1.14    0.15
   6   9  -1    1.04    0.14
   6   9  -1    0.98    0.14
  -5   9   1    7.24    0.47
   5   9  -1    7.09    0.49
  -5   9   1    7.40    0.37
   5   9  -1    7.18    0.41
   5   9  -1    7.32    0.45
   5   9  -1    7.17    0.45
   5   9  -1    7.56    0.48
   5   9  -1    7.19    0.44
  -5   9   1    7.37    0.52
   4   9  -1    6.23    0.40
   4   9  -1    5.83    0.41
   4   9  -1    6.42    0.39
  -4   9   1    7.43    0.45
   4   9  -1    6.43    0.45
   4   9  -1    6.51    0.41
  -4   9   1    6.51    0.47
   4   9  -1    5.91    0.36
   3   9  -1   19.35    1.22
  -3   9   1   19.61    1.13
  -3   9   1   19.37    1.24
   3   9  -1   19.49    1.07
   3   9  -1   18.05    1.13
   3   9  -1   19.61    1.12
   3   9  -1   19.68    1.05
   2   9  -1    8.25    0.49
  -2   9   1    7.53    0.51
   2   9  -1    8.48    0.49
   2   9  -1    8.46    0.51
  -2   9   1    7.52    0.49
  -2   9   1    7.55    0.56
   2   9  -1    8.15    0.55
  -1   9   1    4.75    0.32
   1   9  -1    2.63    0.39
  -1   9   1    3.78    0.32
   1   9  -1    3.59    0.31
   1   9  -1    4.03    0.29
   1   9  -1    4.32    0.30
  -1   9   1    4.06    0.27
   1   9  -1    3.64    0.27
   0   9   1    0.20    0.12
   0   9   1    0.15    0.11
   0   9   1    0.01    0.14
   0   9  -1    0.11    0.09
   0   9  -1   -0.05    0.08
   0   9  -1    0.11    0.16
   0   9   1    0.17    0.10
   0   9  -1    0.08    0.09
   1   9   1   50.39    2.72
   1   9   1   48.40    2.53
  -1   9  -1   50.93    2.53
  -1   9  -1   46.82    2.23
  -1   9  -1   49.05    2.72
   1   9   1   48.15    2.98
  -1   9  -1   48.41    2.98
   1   9   1   42.44    2.91
   2   9   1    5.01    0.36
   2   9   1    5.04    0.33
  -2   9  -1    4.33    0.36
  -2   9  -1    4.58    0.32
  -2   9  -1    4.63    0.36
   2   9   1    4.87    0.33
   2   9   1    5.02    0.33
  -2   9  -1    5.07    0.34
   3   9   1    1.13    0.14
  -3   9  -1    1.59    0.20
   3   9   1    1.22    0.13
   3   9   1    1.25    0.15
   3   9   1    1.33    0.17
   3   9   1    1.22    0.17
  -3   9  -1    1.38    0.18
   4   9   1    2.24    0.20
   4   9   1    2.28    0.21
   4   9   1    2.30    0.17
  -4   9  -1    2.28    0.23
   4   9   1    2.24    0.21
  -4   9  -1    2.60    0.24
   4   9   1    2.24    0.19
   4   9   1    2.26    0.19
   5   9   1    0.75    0.10
   5   9   1    0.66    0.11
   5   9   1    0.72    0.11
   5   9   1    0.74    0.11
  -5   9  -1    0.68    0.11
   5   9   1    0.48    0.11
  -5   9  -1    0.84    0.14
   5   9   1    0.69    0.10
   5   9   1    0.56    0.11
  -6   9  -1    2.73    0.23
   6   9   1    2.51    0.22
   6   9   1    2.36    0.21
   6   9   1    2.55    0.20
  -6   9  -1    3.05    0.25
   6   9   1    2.54    0.21
   6   9   1    2.48    0.19
  -7   9  -1    3.51    0.28
   7   9   1    4.13    0.30
   7   9   1    4.69    0.27
  -7   9  -1    3.79    0.32
  -8   9  -1    1.37    0.17
   8   9   1    1.51    0.13
  -8   9  -1    1.56    0.17
   8   9   1    1.68    0.18
  -9   9  -1    0.65    0.10
   9   9   1    0.81    0.11
  10   9   1    0.38    0.07
  -8  10   1    0.73    0.09
   8  10  -1    0.76    0.09
  -7  10   1   -0.04    0.05
   7  10  -1    0.04    0.05
  -7  10   1   -0.03    0.06
   6  10  -1    1.27    0.13
   6  10  -1    1.50    0.14
  -6  10   1    1.50    0.15
  -6  10   1    1.49    0.15
   5  10  -1    2.71    0.19
  -5  10   1    2.46    0.22
  -5  10   1    2.82    0.22
   5  10  -1    2.65    0.21
   5  10  -1    2.55    0.20
   5  10  -1    2.47    0.20
   5  10  -1    2.79    0.22
  -4  10   1    3.30    0.25
   4  10  -1    3.23    0.23
   4  10  -1    2.59    0.24
  -4  10   1    2.92    0.25
   4  10  -1    3.41    0.24
   4  10  -1    3.18    0.23
  -3  10   1    7.94    0.51
  -3  10   1    7.77    0.54
   3  10  -1    7.10    0.51
   3  10  -1    7.47    0.46
   3  10  -1    8.08    0.49
   3  10  -1    7.89    0.47
  -2  10   1    2.75    0.26
   2  10  -1    2.42    0.21
   2  10  -1    2.68    0.24
   2  10  -1    2.15    0.20
  -2  10   1    2.34    0.24
   1  10  -1    8.80    0.51
  -1  10   1    8.83    0.54
   1  10  -1    7.91    0.57
   1  10  -1    8.41    0.53
  -1  10   1    8.91    0.59
   0  10   1    0.29    0.12
   0  10  -1    0.35    0.10
   0  10   1    0.48    0.13
   0  10  -1    0.40    0.10
   0  10  -1    0.28    0.10
   0  10   1    0.28    0.08
   1  10   1    5.78    0.36
  -1  10  -1    4.39    0.36
   1  10   1    4.80    0.38
  -1  10  -1    5.41    0.38
  -1  10  -1    4.92    0.36
   1  10   1    5.58    0.38
   2  10   1    1.07    0.13
  -2  10  -1    0.73    0.13
   2  10   1    0.81    0.14
  -2  10  -1    1.37    0.16
  -3  10  -1    3.89    0.31
  -3  10  -1    3.90    0.30
   3  10   1    3.89    0.31
   3  10   1    4.40    0.31
   3  10   1    4.22    0.30
  -4  10  -1   13.00    0.84
   4  10   1   12.40    0.71
  -4  10  -1   13.78    0.78
   4  10   1   11.72    0.68
   4  10   1   13.29    0.76
   4  10   1   13.12    0.83
   5  10   1    2.19    0.18
  -5  10  -1    2.28    0.20
   5  10   1    2.15    0.17
  -5  10  -1    2.69    0.23
   5  10   1    2.10    0.17
   5  10   1    2.20    0.17
  -6  10  -1    0.42    0.09
   6  10   1    0.37    0.08
  -6  10  -1    0.45    0.10
   7  10   1    1.00    0.13
  -7  10  -1    0.93    0.12
  -7  10  -1    0.98    0.11
  -8  10  -1    2.00    0.16
  -6  11   1    0.98    0.10
  -6  11   1    0.95    0.10
  -5  11   1    0.06    0.07
  -5  11   1    0.00    0.05
  -4  11   1    0.78    0.10
  -4  11   1    0.77    0.11
   4  11  -1    0.88    0.10
   3  11  -1    8.11    0.49
  -3  11   1    7.75    0.54
  -3  11   1    8.69    0.52
  -2  11   1    0.33    0.08
  -2  11   1    0.29    0.09
   2  11  -1    0.30    0.08
   1  11  -1    1.52    0.15
  -1  11   1    1.33    0.16
  -1  11   1    1.08    0.13
   0  11   1    0.03    0.06
   0  11   1    0.17    0.08
   0  11  -1    0.12    0.08
   1  11   1    1.86    0.18
  -1  11  -1    2.16    0.19
   1  11   1    1.99    0.18
   2  11   1    2.15    0.20
   2  11   1    2.47    0.19
  -2  11  -1    2.46    0.20
  -3  11  -1    0.99    0.12
   3  11   1    0.67    0.09
   3  11   1    0.70    0.09
  -3  11  -1    0.72    0.09
  -4  11  -1    0.04    0.07
   4  11   1    0.02    0.05
  -5  11  -1    0.14    0.07
  -3  12   1    0.21    0.07
  -2  12   1    0.61    0.08
   2  12  -1    0.45    0.07
   1  12  -1    0.91    0.10
  -1  12   1    0.85    0.11
   0  12  -1    3.60    0.24
   0  12   1    3.65    0.24
   1  12   1    0.75    0.10
  -1  12  -1    0.75    0.10
  -2  12  -1    8.71    0.52
  -3  12  -1    1.61    0.14
  15   0  -2    0.02    0.06
  14   0  -2   10.90    0.63
  13   0  -2    0.08    0.11
  11   0  -2    0.09    0.06
  11   0  -2    0.21    0.10
  11   0  -2   -0.05    0.18
  10   0  -2    1.18    0.12
  10   0  -2    1.55    0.27
  10   0  -2    1.45    0.15
  10   0  -2    1.14    0.16
  10   0  -2    1.94    0.28
   9   0  -2   -0.07    0.11
   9   0  -2    0.05    0.07
   9   0  -2   -0.07    0.08
   9   0  -2    0.37    0.08
   8   0  -2   68.79    3.91
   8   0  -2   66.84    3.73
   8   0  -2   65.20    3.69
   7   0  -2    0.08    0.11
   7   0  -2    0.07    0.07
   7   0  -2   -0.12    0.09
   6   0  -2  141.64    8.69
   6   0  -2  162.35    8.45
   6   0  -2  152.98    8.31
   6   0  -2  165.02    8.83
  -6   0   2  153.26    8.71
   5   0  -2    0.05    0.08
  -5   0   2    0.06    0.13
   5   0  -2   -0.07    0.07
  -5   0   2   -0.01    0.07
   5   0  -2    0.08    0.12
   5   0  -2   -0.04    0.05
  -5   0   2   -0.01    0.13
   5   0  -2   -0.14    0.12
  -5   0   2   -0.14    0.07
   4   0  -2   74.97    4.16
   4   0  -2   73.99    4.18
   4   0  -2   76.64    3.97
  -4   0   2   67.20    4.21
  -4   0   2   68.59    3.97
  -4   0   2   76.65    4.18
   4   0  -2   72.21    4.02
   4   0  -2   73.85    4.20
  -4   0   2   80.20    4.18
   3   0  -2   -0.07    0.08
   3   0  -2   -0.07    0.07
  -3   0   2   -0.08    0.05
   3   0  -2    0.01    0.06
  -3   0   2    0.04    0.09
   3   0  -2    0.00    0.05
   3   0  -2    0.03    0.05
   2   0  -2  390.29   22.25
  -2   0   2  368.54   21.00
   2   0  -2  413.72   21.60
   2   0  -2  405.91   21.73
  -2   0   2  379.40   22.26
   2   0  -2  381.59   21.31
   2   0  -2  384.47   21.01
  -2   0   2  400.08   21.67
  -2   0   2  413.68   21.78
  -1   0   2   -0.62    0.04
  -1   0   2   -0.59    0.03
  -1   0   2   -0.60    0.02
   1   0  -2   -0.61    0.02
   1   0  -2   -0.60    0.02
   1   0  -2   -0.60    0.04
   1   0  -2   -0.60    0.02
   1   0  -2   -0.58    0.03
   1   0  -2   -0.60    0.04
  -1   0   2   -0.60    0.02
   0   0   2  148.13    8.71
   0   0  -2  162.72    8.49
   0   0   2  162.63    8.49
   0   0   2  148.40    8.19
   0   0  -2  143.92    8.70
   0   0  -2  159.35    8.49
   0   0  -2  144.18    8.20
   0   0   2  157.02    8.48
   1   0   2    0.25    0.05
   1   0   2    0.26    0.04
  -1   0  -2    0.28    0.05
   2   0   2  482.69   27.72
   2   0   2  499.70   26.95
   2   0   2  471.86   26.55
  -2   0  -2  454.08   26.06
  -2   0  -2  462.11   27.72
   2   0   2  512.66   27.05
  -2   0  -2  504.90   26.94
   2   0   2  472.66   26.08
  -2   0  -2  544.60   27.04
  -3   0  -2    0.05    0.03
   3   0   2   -0.09    0.09
  -3   0  -2   -0.05    0.06
  -3   0  -2    0.02    0.06
   3   0   2   -0.02    0.06
  -3   0  -2    0.04    0.10
   3   0   2   -0.03    0.06
  -3   0  -2   -0.02    0.09
   3   0   2    0.10    0.11
   3   0   2   -0.05    0.06
  -4   0  -2  146.67    8.79
  -4   0  -2  146.21    8.29
   4   0   2  154.73    8.79
   4   0   2  162.31    8.42
  -4   0  -2  139.82    8.70
   4   0   2  158.20    8.65
  -4   0  -2  167.65    8.65
  -4   0  -2  165.33    8.63
  -5   0  -2    0.02    0.12
   5   0   2    0.09    0.08
  -5   0  -2   -0.04    0.12
   5   0   2    0.04    0.12
   5   0   2    0.12    0.09
  -5   0  -2   -0.06    0.08
   5   0   2    0.08    0.14
   5   0   2    0.10    0.08
  -6   0  -2    9.50    0.84
   6   0   2   11.89    0.72
   6   0   2   12.41    0.76
   6   0   2   12.23    0.72
   6   0   2   10.81    0.86
   7   0   2    0.24    0.10
   7   0   2    0.12    0.09
   7   0   2    0.13    0.11
   8   0   2    5.73    0.47
   8   0   2    6.30    0.50
   8   0   2    6.25    0.48
   9   0   2    0.13    0.07
   9   0   2    0.16    0.06
  10   0   2    0.01    0.10
  10   0   2    0.20    0.14
  10   0   2    0.02    0.09
  11   0   2   -0.11    0.17
  11   0   2    0.02    0.10
  12   0   2   -0.08    0.10
  13   0   2    0.14    0.11
  13   0   2    0.02    0.07
  14   0   2    0.03    0.06
  15  -1  -2    0.04    0.06
  15   1  -2    0.05    0.06
  14  -1  -2    4.35    0.28
  14   1  -2    4.46    0.30
  13   1  -2    0.40    0.11
  13   1  -2    0.53    0.13
  12   1  -2    0.23    0.07
  12   1  -2    0.27    0.11
  12   1  -2    0.16    0.09
  11  -1  -2    0.08    0.18
  11   1  -2    0.11    0.11
  11   1  -2   -0.02    0.13
  11   1  -2    0.02    0.07
  10  -1  -2   32.16    2.15
  10   1  -2   33.38    2.04
  10   1  -2   35.65    1.65
  10   1  -2   36.14    2.07
  10   1  -2   34.90    2.02
  10   1  -2   36.79    1.73
  10   1  -2   33.96    2.01
   9   1  -2    2.71    0.32
   9   1  -2    2.49    0.21
   9   1  -2    2.36    0.16
   9   1  -2    2.58    0.17
   9   1  -2    2.76    0.28
   8   1  -2   30.99    1.62
   8   1  -2   32.96    1.87
   8   1  -2   33.51    1.98
   8   1  -2   33.98    1.90
   7  -1  -2   17.79    1.09
   7  -1  -2   17.30    1.15
   7  -1  -2   16.28    1.06
   7   1  -2   18.70    1.07
   7   1  -2   19.10    1.13
   7   1  -2   19.20    1.10
   7   1  -2   18.81    1.10
   6  -1  -2    1.20    0.17
   6  -1  -2    1.06    0.26
   6  -1  -2    0.81    0.13
   6  -1  -2    0.62    0.24
   6  -1  -2    1.11    0.18
   6   1  -2    1.24    0.16
  -6   1   2    0.82    0.24
   6   1  -2    0.83    0.22
   6   1  -2    1.19    0.15
   6   1  -2    1.00    0.15
   6   1  -2    1.20    0.16
  -5  -1   2   54.57    3.16
   5  -1  -2   53.56    3.20
   5  -1  -2   55.54    2.98
  -5  -1   2   56.60    3.15
   5  -1  -2   51.47    3.16
   5  -1  -2   54.46    3.15
   5  -1  -2   54.14    2.99
   5   1  -2   56.98    2.96
   5   1  -2   52.64    3.15
  -5   1   2   55.22    3.19
   5   1  -2   55.15    3.13
  -5   1   2   52.13    3.16
   5   1  -2   57.17    2.99
  -5   1   2   54.60    3.19
   5   1  -2   53.28    3.13
  -5   1   2   52.31    2.98
   5   1  -2   55.91    3.02
   4  -1  -2    0.73    0.12
   4  -1  -2    0.64    0.09
   4  -1  -2    0.78    0.18
   4  -1  -2    0.80    0.20
   4  -1  -2    0.69    0.12
  -4  -1   2    0.69    0.15
  -4  -1   2    0.65    0.16
  -4   1   2    0.78    0.19
   4   1  -2    0.53    0.10
   4   1  -2    0.51    0.14
   4   1  -2    0.74    0.11
   4   1  -2    0.72    0.11
  -4   1   2    0.63    0.12
  -4   1   2    0.65    0.18
  -4   1   2    0.84    0.13
   4   1  -2    0.79    0.11
   4   1  -2    0.56    0.10
   4   1  -2    0.76    0.16
   4   1  -2    0.68    0.11
  -4   1   2    0.64    0.08
   3  -1  -2  584.74   29.76
   3  -1  -2  512.85   29.14
  -3  -1   2  572.47   29.69
   3  -1  -2  521.67   30.54
   3  -1  -2  516.46   28.76
   3  -1  -2  539.85   29.60
   3   1  -2  534.05   29.28
   3   1  -2  562.07   29.68
   3   1  -2  502.28   28.69
   3   1  -2  550.29   29.03
  -3   1   2  504.58   30.27
   3   1  -2  566.39   29.73
  -3   1   2  557.11   29.78
   3   1  -2  499.24   30.47
   3   1  -2  562.52   28.74
  -3   1   2  516.40   28.81
   3   1  -2  540.26   30.49
   2  -1  -2  426.69   22.50
   2  -1  -2  386.46   23.05
  -2  -1   2  461.45   22.44
   2  -1  -2  381.84   21.66
  -2  -1   2  446.14   22.44
   2  -1  -2  409.96   22.37
   2   1  -2  435.79   22.41
   2   1  -2  389.74   21.67
   2   1  -2  373.44   22.98
  -2   1   2  415.76   22.48
   2   1  -2  411.14   22.11
  -2   1   2  413.16   22.41
   2   1  -2  425.42   22.43
   2   1  -2  423.51   21.67
   2   1  -2  394.80   21.91
  -2   1   2  402.30   21.69
   2   1  -2  395.63   22.99
   2   1  -2  341.85   22.80
  -2   1   2  400.96   23.10
  -2   1   2  390.56   22.91
   1  -1  -2    3.62    0.26
   1  -1  -2    3.12    0.22
  -1  -1   2    3.65    0.23
   1  -1  -2    3.43    0.25
   1  -1  -2    3.36    0.23
  -1  -1   2    3.72    0.23
  -1   1   2    3.04    0.23
   1   1  -2    3.24    0.22
  -1   1   2    3.44    0.25
   1   1  -2    3.69    0.23
   1   1  -2    3.40    0.20
  -1   1   2    3.37    0.23
  -1   1   2    3.34    0.23
   1   1  -2    3.42    0.20
   1   1  -2    3.21    0.20
   1   1  -2    3.51    0.22
   1   1  -2    3.50    0.23
  -1   1   2    3.55    0.26
   1   1  -2    3.42    0.22
   1   1  -2    3.13    0.22
  -1   1   2    3.30    0.22
   1   1  -2    3.05    0.22
   0  -1   2    1.49    0.10
   0  -1  -2    1.17    0.10
   0  -1  -2    1.16    0.10
   0  -1   2    1.20    0.10
   0   1   2    1.13    0.08
   0   1  -2    1.53    0.11
   0   1  -2    1.16    0.10
   0   1   2    1.05    0.08
   0   1  -2    1.31    0.09
   0   1   2    1.04    0.08
   0   1  -2    1.21    0.08
   0   1  -2    1.20    0.08
   0   1   2    1.12    0.10
   0   1   2    1.02    0.08
   0   1  -2    1.27    0.10
   0   1   2    1.13    0.10
   0   1  -2    1.33    0.10
   0   1  -2    1.29    0.08
   0   1   2    1.12    0.10
   0   1   2    1.10    0.08
  -1  -1  -2    9.16    0.50
   1  -1   2    7.77    0.50
   1  -1   2    9.44    0.48
   1  -1   2    8.65    0.53
  -1  -1  -2    8.79    0.50
  -1   1  -2    9.02    0.51
  -1   1  -2   10.29    0.54
  -1   1  -2    8.37    0.52
   1   1   2    8.40    0.49
   1   1   2    8.09    0.47
   1   1   2    8.45    0.47
   1   1   2    8.05    0.49
  -1   1  -2    7.62    0.50
   1   1   2    7.93    0.49
   1   1   2    8.61    0.47
  -1   1  -2    7.74    0.50
   1   1   2    9.13    0.50
   1   1   2    7.60    0.47
  -1   1  -2    9.23    0.48
   1   1   2    8.99    0.50
   2  -1   2    5.67    0.39
  -2  -1  -2    5.87    0.36
  -2  -1  -2    5.35    0.35
   2  -1   2    4.98    0.31
   2  -1   2    5.33    0.38
   2  -1   2    5.28    0.34
   2  -1   2    5.20    0.32
  -2   1  -2    5.44    0.34
   2   1   2    5.57    0.35
   2   1   2    5.12    0.32
   2   1   2    4.95    0.33
   2   1   2    5.47    0.32
  -2   1  -2    4.76    0.33
  -2   1  -2    5.58    0.38
  -2   1  -2    5.82    0.38
   2   1   2    5.56    0.31
   2   1   2    4.73    0.31
   2   1   2    4.81    0.32
  -2   1  -2    5.25    0.32
   2   1   2    5.41    0.36
   3  -1   2   40.85    2.41
  -3  -1  -2   44.43    2.37
  -3  -1  -2   44.08    2.38
   3  -1   2   43.56    2.41
   3  -1   2   41.80    2.26
   3  -1   2   40.40    2.28
   3  -1   2   40.79    2.40
   3   1   2   41.81    2.30
  -3   1  -2   42.37    2.40
   3   1   2   37.93    2.38
  -3   1  -2   40.81    2.37
   3   1   2   36.03    2.24
  -3   1  -2   44.74    2.42
   3   1   2   44.84    2.38
  -3   1  -2   41.15    2.26
   3   1   2   43.38    2.25
   3   1   2   43.27    2.37
  -3   1  -2   42.52    2.40
   3   1   2   37.87    2.37
   4  -1   2   30.36    1.75
  -4  -1  -2   32.41    1.77
  -4  -1  -2   31.67    1.76
   4  -1   2   30.49    1.66
   4  -1   2   29.22    1.81
  -4   1  -2   29.25    1.79
   4   1   2   26.73    1.73
  -4   1  -2   29.38    1.66
   4   1   2   31.33    1.73
   4   1   2   25.83    1.63
  -4   1  -2   30.34    1.80
  -4   1  -2   28.32    1.71
  -4   1  -2   31.07    1.75
   4   1   2   31.63    1.68
   4   1   2   30.05    1.77
   5  -1   2    1.29    0.18
  -5  -1  -2    1.26    0.23
   5  -1   2    1.40    0.18
   5  -1   2    1.10    0.25
  -5  -1  -2    1.23    0.22
   5  -1   2    1.28    0.26
   5  -1   2    1.41    0.15
   5   1   2    1.38    0.23
   5   1   2    1.61    0.17
   5   1   2    1.56    0.17
   5   1   2    1.56    0.16
  -5   1  -2    1.53    0.13
  -5   1  -2    1.29    0.18
  -5   1  -2    1.35    0.18
   5   1   2    1.21    0.23
  -5   1  -2    1.45    0.26
  -5   1  -2    1.48    0.26
   6  -1   2   97.46    5.39
   6  -1   2   91.34    5.63
   6  -1   2   98.76    5.65
   6  -1   2  100.49    5.34
   6   1   2   97.42    5.63
   6   1   2  103.31    5.42
   6   1   2  102.89    5.31
  -6   1  -2   95.38    5.63
   7  -1   2    0.26    0.13
   7  -1   2    0.23    0.13
   7  -1   2    0.20    0.10
   7   1   2    0.23    0.11
   7   1   2    0.30    0.12
   7   1   2    0.18    0.11
   7   1   2    0.50    0.15
   8  -1   2    0.60    0.18
   8  -1   2    0.63    0.18
   8  -1   2    0.70    0.10
   8   1   2    0.76    0.17
   8   1   2    0.74    0.17
   8   1   2    0.70    0.08
   8   1   2    0.78    0.16
   8   1   2    0.76    0.11
   8   1   2    0.78    0.15
   8   1   2    0.68    0.08
   9  -1   2    6.51    0.58
   9   1   2    7.33    0.57
   9   1   2    7.00    0.54
   9   1   2    7.26    0.46
  10  -1   2    7.29    0.67
  10  -1   2    8.72    0.54
  10   1   2    8.27    0.65
  10   1   2    8.95    0.65
  10   1   2    8.96    0.54
  11  -1   2    4.60    0.50
  11  -1   2    5.02    0.37
  11   1   2    5.87    0.36
  11   1   2    5.01    0.51
  11   1   2    5.54    0.39
  12  -1   2    1.64    0.16
  12   1   2    1.74    0.16
  12   1   2    1.50    0.17
  13   1   2    2.74    0.23
  13   1   2    2.80    0.21
  14  -1   2    1.23    0.15
  14   1   2    1.11    0.13
  14   1   2    0.96    0.12
  15  -2  -2    0.37    0.07
  14  -2  -2    1.09    0.12
  14   2  -2    0.65    0.10
  13   2  -2    3.67    0.27
  13   2  -2    3.61    0.26
  12   2  -2    4.75    0.37
  12   2  -2    5.54    0.36
  11   2  -2   20.88    1.42
  11   2  -2   24.50    1.26
  11   2  -2   22.12    1.34
  10   2  -2   24.68    1.53
  10   2  -2   27.75    1.44
  10   2  -2   25.52    1.60
  10   2  -2   26.49    1.25
   9  -2  -2   12.69    0.74
   9   2  -2   13.10    0.82
   9   2  -2   13.42    0.91
   9   2  -2   13.40    0.66
   9   2  -2   14.76    0.77
   8   2  -2   11.29    0.71
   8   2  -2   12.49    0.76
   8   2  -2   11.17    0.57
   8   2  -2   10.44    0.54
   8   2  -2   11.54    0.76
   8   2  -2   10.22    0.67
   7  -2  -2    0.10    0.09
   7  -2  -2    0.18    0.13
   7   2  -2    0.13    0.09
   7   2  -2    0.38    0.14
   7   2  -2    0.17    0.09
   7   2  -2    0.23    0.11
   6  -2  -2   96.27    5.56
   6  -2  -2   83.33    5.56
   6  -2  -2   97.50    5.25
   6   2  -2   99.81    5.20
   6   2  -2  105.28    5.28
   6   2  -2  105.13    5.33
  -6   2   2   83.60    5.53
  -6   2   2   97.73    5.57
   6   2  -2   98.21    5.51
  -6   2   2   97.48    5.25
   5  -2  -2   27.61    1.61
   5  -2  -2   27.98    1.81
  -5  -2   2   28.61    1.70
   5  -2  -2   26.54    1.77
  -5  -2   2   27.89    1.71
   5  -2  -2   30.51    1.71
  -5   2   2   27.52    1.78
   5   2  -2   27.64    1.67
  -5   2   2   27.69    1.62
   5   2  -2   24.59    1.57
   5   2  -2   25.50    1.69
   5   2  -2   29.78    1.66
   5   2  -2   28.46    1.69
   5   2  -2   30.64    1.57
   5   2  -2   31.39    1.64
  -5   2   2   30.98    1.72
   5   2  -2   30.41    1.61
  -5   2   2   28.75    1.66
  -5   2   2   28.25    1.79
  -4  -2   2  133.11    7.31
  -4  -2   2  139.46    7.32
   4  -2  -2  133.43    7.06
   4  -2  -2  127.19    7.49
   4  -2  -2  138.60    7.39
   4  -2  -2  133.76    7.41
  -4   2   2  141.40    7.07
   4   2  -2  122.82    7.31
   4   2  -2  116.31    7.03
   4   2  -2  136.21    7.18
  -4   2   2  133.39    7.43
   4   2  -2  133.89    7.45
   4   2  -2  138.22    7.11
  -4   2   2  132.98    7.50
   4   2  -2  113.62    7.39
   4   2  -2  131.99    7.30
  -4   2   2  142.43    7.41
   4   2  -2  132.90    7.11
  -4   2   2  132.47    7.39
   4   2  -2  124.51    7.46
   3  -2  -2  158.42    8.46
   3  -2  -2  166.13    8.81
  -3  -2   2  172.18    8.74
   3  -2  -2  158.67    8.83
   3  -2  -2  152.61    8.98
  -3  -2   2  165.47    8.74
  -3   2   2  161.80    8.99
   3   2  -2  160.78    8.74
  -3   2   2  155.40    8.80
   3   2  -2  143.66    8.43
   3   2  -2  157.11    8.73
  -3   2   2  170.92    8.83
  -3   2   2  167.44    8.47
   3   2  -2  163.91    8.53
   3   2  -2  155.10    8.53
  -3   2   2  159.16    8.93
   3   2  -2  150.61    9.01
   3   2  -2  152.95    9.01
   3   2  -2  156.68    8.60
   3   2  -2  142.18    8.90
   2  -2  -2  211.72   10.61
   2  -2  -2  186.48   10.22
  -2  -2   2  210.57   10.61
   2  -2  -2  177.81   10.85
   2  -2  -2  202.23   10.62
   2   2  -2  205.95   10.61
   2   2  -2  188.29   10.39
  -2   2   2  199.94   10.31
   2   2  -2  187.86   10.31
  -2   2   2  161.40   10.84
   2   2  -2  191.23   10.88
  -2   2   2  186.47   10.79
   2   2  -2  182.57   10.24
   2   2  -2  199.97   10.89
   2   2  -2  193.46   10.56
   2   2  -2  202.80   10.18
  -2   2   2  194.13   10.61
   2   2  -2  194.45   10.26
   2   2  -2  173.11   10.82
   1  -2  -2    7.53    0.49
  -1  -2   2    7.84    0.43
  -1  -2   2    8.05    0.43
   1  -2  -2    7.62    0.48
  -1   2   2    7.20    0.44
   1   2  -2    6.86    0.42
  -1   2   2    7.37    0.45
   1   2  -2    7.56    0.43
   1   2  -2    7.33    0.41
  -1   2   2    8.12    0.43
   1   2  -2    7.13    0.43
  -1   2   2    8.31    0.47
   1   2  -2    7.78    0.43
   1   2  -2    6.79    0.46
  -1   2   2    6.89    0.43
  -1   2   2    7.78    0.48
   1   2  -2    6.98    0.44
   1   2  -2    6.97    0.40
  -1   2   2    8.15    0.49
   1   2  -2    7.29    0.43
  -1   2   2    8.13    0.46
  -1   2   2    7.40    0.42
   1   2  -2    6.92    0.44
   0  -2   2  143.01    7.02
   0  -2   2  129.82    7.04
   0  -2  -2  133.26    7.04
   0  -2  -2  141.05    7.06
   0   2  -2  125.57    7.18
   0   2   2  123.20    6.84
   0   2  -2  130.07    6.86
   0   2   2  117.12    6.92
   0   2  -2  124.36    6.80
   0   2   2  127.22    7.18
   0   2  -2  139.65    7.02
   0   2  -2  117.37    6.73
   0   2   2  124.66    7.01
   0   2  -2  128.38    7.02
   0   2   2  122.06    7.26
   0   2   2  120.63    6.74
   0   2   2  120.66    6.82
   0   2  -2  128.39    7.28
   0   2   2  127.41    6.85
   0   2  -2  127.96    6.86
   0   2  -2  125.44    7.24
   0   2   2  129.71    7.05
   0   2   2  127.79    7.27
   1  -2   2  500.90   26.07
   1  -2   2  492.09   26.10
   1   2   2  467.44   25.44
  -1   2  -2  487.76   26.07
   1   2   2  472.51   25.92
   1   2   2  471.54   25.03
  -1   2  -2  466.76   26.79
   1   2   2  467.94   26.66
  -1   2  -2  473.30   26.75
  -1   2  -2  423.24   25.17
  -1   2  -2  505.19   26.06
  -1   2  -2  472.90   26.76
   1   2   2  448.98   25.68
  -1   2  -2  467.94   25.24
  -2  -2  -2    6.54    0.38
   2  -2   2    6.25    0.46
   2  -2   2    6.14    0.44
   2  -2   2    5.35    0.34
   2  -2   2    5.52    0.39
  -2  -2  -2    6.46    0.37
   2  -2   2    5.32    0.37
   2   2   2    6.21    0.37
  -2   2  -2    6.34    0.45
   2   2   2    5.76    0.38
  -2   2  -2    6.32    0.39
   2   2   2    6.22    0.36
   2   2   2    5.83    0.36
  -2   2  -2    5.99    0.39
   2   2   2    5.73    0.34
   2   2   2    6.19    0.37
  -2   2  -2    6.57    0.44
   2   2   2    6.08    0.34
   2   2   2    5.96    0.38
   2   2   2    5.88    0.36
   2   2   2    6.12    0.36
  -2   2  -2    6.21    0.38
   3  -2   2  311.43   18.90
   3  -2   2  331.19   18.44
   3  -2   2  305.30   18.10
  -3  -2  -2  353.91   18.45
  -3  -2  -2  342.42   18.48
   3   2   2  298.09   17.85
  -3   2  -2  341.53   19.01
  -3   2  -2  334.35   19.01
   3   2   2  347.57   19.00
   3   2   2  341.39   18.27
   3   2   2  323.49   18.43
   3   2   2  314.28   18.05
  -3   2  -2  358.84   18.44
  -3   2  -2  342.06   18.06
   3   2   2  365.18   17.89
  -3   2  -2  342.10   18.42
   4  -2   2   30.40    1.95
   4  -2   2   29.60    1.75
  -4  -2  -2   32.70    1.86
  -4  -2  -2   34.37    1.85
   4  -2   2   30.65    1.93
   4  -2   2   32.22    1.88
   4  -2   2   30.56    1.78
  -4   2  -2   35.40    1.89
   4   2   2   33.31    1.74
   4   2   2   32.91    1.77
  -4   2  -2   32.40    1.93
   4   2   2   33.25    1.84
  -4   2  -2   30.99    1.85
   4   2   2   29.67    1.74
  -4   2  -2   31.80    1.94
   4   2   2   30.91    1.85
   4   2   2   29.88    1.84
  -4   2  -2   32.45    1.78
   4   2   2   31.38    1.85
   4   2   2   33.36    1.81
   5  -2   2   75.37    4.09
   5  -2   2   74.43    4.34
   5  -2   2   71.27    4.10
  -5  -2  -2   74.75    4.27
   5  -2   2   67.03    4.35
   5  -2   2   75.54    4.36
  -5   2  -2   76.76    4.36
   5   2   2   80.72    4.16
   5   2   2   83.42    4.11
   5   2   2   72.77    4.25
   5   2   2   80.37    4.05
  -5   2  -2   76.84    4.34
   5   2   2   70.42    4.30
   5   2   2   73.38    4.26
  -5   2  -2   73.69    4.27
   5   2   2   84.73    4.30
  -5   2  -2   72.49    4.33
   5   2   2   66.08    4.05
  -5   2  -2   78.28    4.10
   6  -2   2    0.34    0.13
   6  -2   2    0.47    0.12
   6  -2   2    0.26    0.22
  -6   2  -2    0.03    0.18
   6   2   2    0.38    0.10
  -6   2  -2    0.47    0.14
   6   2   2    0.41    0.10
   6   2   2    0.47    0.14
  -6   2  -2    0.44    0.13
   6   2   2    0.43    0.10
   7  -2   2   18.24    1.29
   7  -2   2   19.01    1.22
   7   2   2   21.48    1.25
   7   2   2   21.62    1.18
   7   2   2   20.96    1.25
   7   2   2   20.53    1.21
   8   2   2    8.02    0.42
   8   2   2    8.45    0.60
   8   2   2    7.41    0.50
   8   2   2    7.97    0.44
   8   2   2    8.42    0.58
   8   2   2    8.24    0.55
   8   2   2    8.67    0.59
   8   2   2    7.81    0.41
   9  -2   2    8.34    0.52
   9   2   2    9.57    0.67
   9   2   2    9.97    0.55
   9   2   2    9.36    0.59
   9   2   2    9.50    0.67
  10   2   2    1.05    0.13
  10   2   2    1.40    0.14
  10   2   2    0.66    0.22
  10   2   2    0.96    0.16
  11   2   2   11.64    0.76
  11   2   2   12.63    0.71
  12   2   2    5.08    0.33
  12   2   2    4.86    0.35
  13   2   2    6.19    0.38
  13   2   2    5.88    0.40
  14  -2   2    2.22    0.18
  14   2   2    1.70    0.14
  14   2   2    1.71    0.18
  14   3  -2    0.04    0.09
  14   3  -2    0.03    0.08
  13   3  -2    1.71    0.17
  13   3  -2    1.83    0.19
  12   3  -2    0.94    0.16
  12   3  -2    1.01    0.14
  11   3  -2    7.02    0.49
  11   3  -2    7.47    0.46
  10  -3  -2   15.34    0.90
  10   3  -2   16.81    1.00
  10   3  -2   18.26    0.93
  10   3  -2   15.20    1.10
   9   3  -2    1.96    0.20
   9   3  -2    2.07    0.17
   9   3  -2    1.57    0.28
   9   3  -2    1.97    0.17
   8   3  -2    9.97    0.69
   8   3  -2    9.53    0.65
   8   3  -2    9.86    0.57
   8   3  -2    9.87    0.49
   8   3  -2    9.47    0.61
   8   3  -2   10.40    0.54
  -7   3   2    4.37    0.41
   7   3  -2    4.57    0.24
   7   3  -2    5.06    0.35
   7   3  -2    4.69    0.25
   7   3  -2    4.90    0.33
   7   3  -2    4.71    0.40
   7   3  -2    4.23    0.33
   7   3  -2    4.78    0.27
   6   3  -2    3.80    0.32
   6   3  -2    3.88    0.31
   6   3  -2    4.10    0.27
  -6   3   2    2.93    0.28
  -6   3   2    3.87    0.35
   6   3  -2    3.72    0.25
  -6   3   2    3.19    0.32
   5  -3  -2    0.44    0.20
  -5  -3   2    0.35    0.12
  -5   3   2    0.68    0.25
   5   3  -2    0.90    0.10
   5   3  -2    0.69    0.09
   5   3  -2    0.62    0.09
   5   3  -2    0.82    0.14
   5   3  -2    0.47    0.13
  -5   3   2    0.83    0.16
  -5   3   2    0.87    0.13
   5   3  -2    0.54    0.12
  -5   3   2    0.98    0.15
   5   3  -2    0.61    0.09
  -4  -3   2   21.20    1.25
   4  -3  -2   21.22    1.39
   4  -3  -2   21.72    1.43
  -4  -3   2   19.35    1.25
  -4   3   2   21.24    1.39
  -4   3   2   22.79    1.31
   4   3  -2   19.68    1.26
   4   3  -2   23.67    1.25
   4   3  -2   21.17    1.25
  -4   3   2   23.79    1.33
   4   3  -2   22.12    1.25
   4   3  -2   21.11    1.25
   4   3  -2   22.57    1.18
  -4   3   2   22.30    1.41
   4   3  -2   21.27    1.25
   4   3  -2   23.32    1.27
   4   3  -2   20.62    1.18
  -4   3   2   23.53    1.26
   3  -3  -2    0.15    0.13
  -3  -3   2    0.26    0.03
   3  -3  -2    0.01    0.08
  -3  -3   2    0.31    0.03
   3  -3  -2    0.25    0.09
   3  -3  -2    0.35    0.15
   3   3  -2    0.27    0.03
   3   3  -2    0.30    0.04
   3   3  -2    0.26    0.09
  -3   3   2    0.12    0.12
   3   3  -2    0.24    0.03
  -3   3   2    0.17    0.09
  -3   3   2    0.18    0.09
   3   3  -2    0.30    0.03
  -3   3   2    0.35    0.14
   3   3  -2    0.28    0.03
   3   3  -2    0.13    0.07
  -3   3   2    0.39    0.09
   3   3  -2    0.26    0.03
   3   3  -2    0.32    0.07
   3   3  -2    0.38    0.09
   2  -3  -2   52.57    2.95
   2  -3  -2   54.30    2.94
  -2   3   2   55.69    2.95
  -2   3   2   53.40    2.95
   2   3  -2   49.95    2.94
   2   3  -2   52.73    2.82
  -2   3   2   53.06    2.95
  -2   3   2   51.14    2.93
   2   3  -2   52.12    2.74
  -2   3   2   44.80    2.77
  -2   3   2   53.14    2.78
  -2   3   2   49.60    2.77
   2   3  -2   51.80    2.83
  -2   3   2   45.90    2.94
  -1  -3   2   75.86    3.98
   1  -3  -2   72.67    4.07
  -1  -3   2   74.70    3.99
   1  -3  -2   78.04    4.07
   1   3  -2   69.34    3.85
  -1   3   2   68.46    3.87
   1   3  -2   72.06    3.86
  -1   3   2   73.80    3.89
   1   3  -2   72.92    3.98
  -1   3   2   73.48    4.06
   1   3  -2   74.81    3.98
  -1   3   2   76.62    4.07
   1   3  -2   71.29    4.13
   1   3  -2   72.73    4.10
   1   3  -2   73.20    4.10
   1   3  -2   73.45    3.94
  -1   3   2   69.74    4.12
   1   3  -2   73.20    3.96
  -1   3   2   62.50    3.93
  -1   3   2   74.18    4.13
   1   3  -2   73.15    3.86
  -1   3   2   68.46    3.88
  -1   3   2   74.70    4.14
   0  -3  -2   10.71    0.65
   0  -3  -2   10.86    0.65
   0  -3   2   11.61    0.66
   0   3  -2   10.95    0.68
   0   3   2   10.76    0.65
   0   3   2   10.30    0.60
   0   3  -2   10.00    0.61
   0   3  -2   11.13    0.64
   0   3   2   10.31    0.63
   0   3   2   10.57    0.63
   0   3  -2   11.45    0.66
   0   3   2    9.92    0.60
   0   3   2   11.08    0.63
   0   3  -2   11.78    0.65
   0   3  -2   11.53    0.60
   0   3   2   11.10    0.68
   0   3   2   10.31    0.62
   0   3  -2   11.35    0.65
   0   3  -2   10.73    0.60
   0   3  -2   10.59    0.63
   0   3   2   10.35    0.64
   1  -3   2   44.02    2.40
   1   3   2   41.33    2.31
  -1   3  -2   39.11    2.25
  -1   3  -2   41.72    2.42
  -1   3  -2   43.55    2.38
   1   3   2   42.72    2.41
  -1   3  -2   44.13    2.39
   1   3   2   40.90    2.29
  -1   3  -2   42.40    2.26
  -1   3  -2   43.69    2.40
  -1   3  -2   39.65    2.39
  -1   3  -2   40.58    2.26
   1   3   2   41.66    2.26
   2  -3   2   84.70    5.45
   2  -3   2   99.62    5.39
   2  -3   2   96.13    5.39
  -2   3  -2  100.83    5.45
   2   3   2   97.81    5.18
   2   3   2   97.44    5.43
   2   3   2   97.88    5.23
  -2   3  -2   89.13    5.45
  -2   3  -2   99.35    5.45
   2   3   2   99.37    5.10
  -2   3  -2   98.54    5.38
  -2   3  -2   96.19    5.36
  -2   3  -2  101.85    5.14
  -2   3  -2   84.83    5.13
   3  -3   2   50.82    3.30
  -3  -3  -2   59.07    3.36
   3  -3   2   59.16    3.51
   3  -3   2   60.21    3.51
  -3  -3  -2   62.54    3.36
   3   3   2   61.17    3.44
   3   3   2   59.82    3.46
   3   3   2   55.90    3.24
  -3   3  -2   65.39    3.50
   3   3   2   67.62    3.27
  -3   3  -2   61.42    3.49
   3   3   2   62.75    3.24
   3   3   2   63.94    3.36
   3   3   2   63.26    3.45
  -3   3  -2   60.37    3.49
  -3   3  -2   62.93    3.30
   3   3   2   61.02    3.36
   3   3   2   60.08    3.31
  -3   3  -2   60.49    3.50
   3   3   2   59.42    3.36
   4  -3   2   11.23    0.86
  -4  -3  -2   11.68    0.73
  -4  -3  -2   10.79    0.73
   4  -3   2   10.97    0.89
   4   3   2   11.90    0.67
   4   3   2   12.85    0.71
  -4   3  -2   12.98    0.78
  -4   3  -2   10.81    0.84
   4   3   2   11.92    0.72
  -4   3  -2   12.74    0.74
  -4   3  -2   11.83    0.77
  -4   3  -2   12.31    0.88
   4   3   2   12.90    0.67
   4   3   2   11.79    0.73
   4   3   2   11.78    0.73
   4   3   2   11.94    0.71
   4   3   2   13.11    0.76
   4   3   2   13.63    0.72
   5  -3   2   41.97    2.86
   5   3   2   43.98    2.55
  -5   3  -2   41.80    2.83
   5   3   2   49.73    2.67
   5   3   2   44.14    2.70
   5   3   2   51.52    2.71
   5   3   2   51.22    2.55
  -5   3  -2   50.57    2.63
  -5   3  -2   49.19    2.74
   5   3   2   47.12    2.61
  -5   3  -2   52.13    2.78
   5   3   2   41.30    2.68
   6   3   2    0.63    0.10
   6   3   2    0.84    0.12
   6   3   2    0.57    0.13
   6   3   2    0.82    0.16
  -6   3  -2    0.72    0.17
  -6   3  -2    0.48    0.12
  -6   3  -2    0.68    0.16
   7   3   2    8.52    0.60
   7   3   2    8.09    0.42
   7   3   2    8.32    0.54
   7   3   2    9.24    0.54
   7   3   2    9.05    0.57
   7   3   2    8.11    0.43
   7   3   2    8.82    0.47
   7   3   2    9.38    0.64
   8   3   2   10.43    0.74
   8   3   2    9.90    0.72
   8   3   2   10.00    0.60
   8   3   2   10.67    0.57
   8   3   2    9.56    0.51
   8   3   2   10.43    0.53
   8   3   2   10.70    0.65
   8   3   2   10.96    0.66
   8   3   2   11.97    0.63
   8   3   2   10.27    0.69
   9   3   2   12.13    0.69
   9   3   2   11.16    0.82
   9   3   2   12.02    0.59
   9   3   2   12.32    0.65
   9   3   2   11.99    0.74
  10   3   2    0.43    0.07
  10   3   2    0.55    0.11
  10   3   2    0.57    0.14
  11   3   2    6.86    0.43
  11   3   2    6.88    0.48
  12   3   2    0.12    0.08
  12   3   2    0.13    0.12
  13   3   2   -0.04    0.06
  13   3   2    0.08    0.08
  14   4  -2    0.08    0.06
  14   4  -2    0.07    0.06
  13   4  -2    0.02    0.10
  13   4  -2    0.42    0.12
  12   4  -2    0.51    0.13
  12   4  -2    0.52    0.11
  11   4  -2    1.00    0.15
  11   4  -2    1.23    0.16
  10   4  -2    5.71    0.38
  10   4  -2    5.46    0.40
   9   4  -2   44.95    2.15
  -9   4   2   37.97    2.21
   9   4  -2   41.58    2.41
   9   4  -2   42.45    2.25
   8   4  -2   10.44    0.68
   8   4  -2    8.28    0.46
   8   4  -2    7.97    0.40
   8   4  -2    8.08    0.52
  -8   4   2    7.51    0.47
   8   4  -2    7.79    0.48
   8   4  -2    7.67    0.62
   7   4  -2    7.19    0.40
   7   4  -2    7.50    0.35
   7   4  -2    7.18    0.43
   7   4  -2    6.84    0.46
   7   4  -2    6.63    0.54
  -6   4   2   47.46    2.65
  -6   4   2   48.81    2.80
  -6   4   2   45.72    2.74
   6   4  -2   47.99    2.68
   6   4  -2   45.28    2.65
   5   4  -2    0.20    0.12
  -5   4   2    0.47    0.14
   5   4  -2    0.11    0.11
  -5   4   2    0.11    0.11
  -5   4   2    0.08    0.09
  -4   4   2   19.54    1.12
   4   4  -2   18.67    1.08
   4   4  -2   17.79    1.07
  -4   4   2   18.21    1.12
   4   4  -2   16.44    1.08
  -4   4   2   17.74    1.06
  -3   4   2   56.99    3.32
   3   4  -2   55.10    3.31
  -3   4   2   62.57    3.15
  -3   4   2   58.97    3.33
   3   4  -2   56.70    3.18
   3   4  -2   58.89    3.09
  -3   4   2   57.35    3.36
  -3   4   2   57.44    3.13
   3   4  -2   59.62    3.20
  -3   4   2   52.79    3.32
   2  -4  -2    0.18    0.15
   2  -4  -2    0.27    0.12
  -2   4   2    0.24    0.12
  -2   4   2    0.30    0.09
   2   4  -2    0.37    0.09
   2   4  -2    0.31    0.09
  -2   4   2    0.46    0.13
   2   4  -2    0.36    0.11
  -2   4   2    0.13    0.10
  -2   4   2    0.35    0.09
  -2   4   2    0.34    0.08
  -2   4   2    0.28    0.08
   2   4  -2    0.36    0.07
  -2   4   2    0.19    0.08
   1  -4  -2   46.96    2.81
   1  -4  -2   49.67    2.81
  -1   4   2   53.08    2.67
   1   4  -2   49.00    2.65
  -1   4   2   47.64    2.80
  -1   4   2   47.94    2.83
  -1   4   2   51.89    2.83
   1   4  -2   51.57    2.73
  -1   4   2   50.44    2.68
  -1   4   2   46.44    2.66
  -1   4   2   44.06    2.68
  -1   4   2   53.09    2.87
   1   4  -2   50.74    2.86
   1   4  -2   50.29    2.72
  -1   4   2   49.48    2.81
   0  -4  -2   16.04    0.92
   0  -4  -2   14.88    0.91
   0  -4   2   16.09    0.93
   0  -4   2   15.85    0.92
   0   4  -2   16.39    0.86
   0   4  -2   15.28    0.91
   0   4  -2   14.77    0.88
   0   4  -2   16.20    0.98
   0   4  -2   15.42    0.91
   0   4  -2   15.63    0.86
   0   4   2   14.10    0.88
   0   4   2   15.22    0.90
   0   4   2   15.89    0.91
   0   4  -2   16.83    0.91
   0   4   2   16.28    0.97
   0   4   2   15.00    0.91
   0   4  -2   15.77    0.93
   0   4   2   15.70    0.85
   0   4   2   15.51    0.85
   0   4  -2   16.85    0.93
   0   4   2   15.30    0.89
   0   4   2   15.54    0.91
   1  -4   2    1.51    0.19
   1  -4   2    1.55    0.19
   1   4   2    1.53    0.15
  -1   4  -2    1.43    0.19
  -1   4  -2    1.76    0.16
  -1   4  -2    1.43    0.13
   1   4   2    1.56    0.16
  -1   4  -2    1.62    0.14
  -1   4  -2    1.54    0.13
  -1   4  -2    1.44    0.17
   1   4   2    1.62    0.15
   1   4   2    1.72    0.19
  -1   4  -2    1.23    0.12
  -1   4  -2    1.60    0.19
   2  -4   2    4.94    0.44
   2  -4   2    5.06    0.44
  -2   4  -2    5.78    0.36
  -2   4  -2    5.29    0.42
  -2   4  -2    5.62    0.45
   2   4   2    5.28    0.38
   2   4   2    5.36    0.35
  -2   4  -2    4.47    0.34
   2   4   2    4.96    0.35
  -2   4  -2    5.48    0.36
  -2   4  -2    5.99    0.37
  -2   4  -2    5.90    0.40
  -2   4  -2    4.97    0.37
   2   4   2    4.99    0.36
  -3   4  -2   99.74    5.61
   3   4   2   99.99    5.25
   3   4   2   93.25    5.33
  -3   4  -2  103.98    5.62
   3   4   2   95.57    5.58
  -3   4  -2  103.14    5.30
   3   4   2   98.19    5.39
  -3   4  -2   92.73    5.57
   4   4   2   16.18    0.88
  -4   4  -2   14.53    0.95
   4   4   2   14.92    0.92
  -4   4  -2   14.89    0.90
  -4   4  -2   15.37    0.95
   4   4   2   14.01    0.89
   5   4   2   28.51    1.68
  -5   4  -2   29.98    1.79
  -5   4  -2   30.80    1.71
  -5   4  -2   29.08    1.78
   5   4   2   29.77    1.73
   6   4   2    1.47    0.16
  -6   4  -2    1.41    0.23
   6   4   2    1.32    0.09
  -6   4  -2    1.27    0.20
   6   4   2    1.62    0.14
   6   4   2    1.51    0.20
   6   4   2    1.54    0.13
  -6   4  -2    1.42    0.23
   7   4   2   30.84    1.49
   7   4   2   29.69    1.35
   7   4   2   27.07    1.55
  -7   4  -2   28.45    1.71
   7   4   2   29.50    1.64
  -7   4  -2   27.65    1.53
   7   4   2   27.14    1.55
   7   4   2   33.12    1.79
   7   4   2   27.27    1.68
  -7   4  -2   29.18    1.80
   7   4   2   26.94    1.64
   7   4   2   27.40    1.40
   7   4   2   28.61    1.67
   7   4   2   29.35    1.55
   8   4   2    4.63    0.32
   8   4   2    4.88    0.36
   8   4   2    5.34    0.31
   8   4   2    4.79    0.29
   8   4   2    5.16    0.26
   9   4   2   16.85    0.97
  -9   4  -2   16.94    0.96
   9   4   2   17.96    0.84
   9   4   2   17.34    1.05
   9   4   2   17.91    0.93
  10   4   2    2.77    0.23
  10   4   2    3.01    0.27
  11   4   2    0.23    0.12
  11   4   2    0.18    0.10
  12   4   2    0.59    0.12
  12   4   2    0.81    0.15
  13   4   2   10.12    0.62
  13   5  -2    6.37    0.41
  13   5  -2    6.35    0.38
  12   5  -2    0.13    0.08
  12   5  -2    0.16    0.08
  11   5  -2    1.11    0.15
  11   5  -2    1.16    0.14
  10   5  -2    1.85    0.18
  10   5  -2    1.73    0.22
   9   5  -2    0.09    0.06
   9   5  -2    0.11    0.11
   9   5  -2   -0.07    0.14
   9   5  -2    0.13    0.10
   8   5  -2    1.08    0.14
   8   5  -2    1.13    0.12
   8   5  -2    0.66    0.22
   8   5  -2    0.97    0.08
   8   5  -2    0.87    0.12
   7   5  -2    3.67    0.28
   7   5  -2    3.83    0.20
   7   5  -2    4.06    0.29
   7   5  -2    3.74    0.28
   7   5  -2    4.22    0.27
   7   5  -2    4.34    0.26
   7   5  -2    3.26    0.36
   6   5  -2    2.24    0.12
  -6   5   2    2.25    0.17
   6   5  -2    2.21    0.28
  -6   5   2    2.62    0.29
   6   5  -2    2.34    0.18
   6   5  -2    2.33    0.19
   6   5  -2    2.52    0.20
   6   5  -2    2.64    0.17
  -6   5   2    2.02    0.18
  -5   5   2   21.44    1.27
   5   5  -2   21.51    1.27
  -5   5   2   22.92    1.28
   5   5  -2   20.50    1.19
   5   5  -2   21.66    1.09
  -5   5   2   21.84    1.32
   5   5  -2   19.76    1.23
  -5   5   2   21.14    1.32
  -5   5   2   19.58    1.12
   4   5  -2    0.50    0.12
  -4   5   2    0.65    0.13
   4   5  -2    0.92    0.17
  -4   5   2    0.59    0.14
  -4   5   2    0.62    0.14
  -4   5   2    1.11    0.19
   4   5  -2    0.67    0.12
   4   5  -2    0.69    0.13
   3   5  -2    0.30    0.11
  -3   5   2    0.48    0.11
   3   5  -2    0.30    0.12
   3   5  -2    0.33    0.12
  -3   5   2    0.19    0.11
  -3   5   2    0.30    0.09
  -3   5   2    0.33    0.13
   3   5  -2    0.21    0.08
   2   5  -2    9.44    0.58
  -2   5   2    9.41    0.62
  -2   5   2    9.97    0.62
   2   5  -2    9.76    0.61
  -2   5   2   10.28    0.60
   2   5  -2    9.84    0.63
   2   5  -2    9.42    0.66
  -2   5   2    9.80    0.68
   1   5  -2    2.30    0.19
  -1   5   2    2.35    0.23
  -1   5   2    2.68    0.18
  -1   5   2    2.43    0.18
  -1   5   2    2.52    0.18
  -1   5   2    2.26    0.18
  -1   5   2    2.36    0.26
  -1   5   2    2.13    0.23
   1   5  -2    2.41    0.22
   1   5  -2    2.51    0.26
   1   5  -2    2.37    0.20
   0  -5   2    0.15    0.06
   0  -5  -2    0.14    0.05
   0   5   2    0.18    0.05
   0   5  -2    0.27    0.05
   0   5  -2    0.17    0.06
   0   5  -2    0.22    0.04
   0   5  -2    0.24    0.04
   0   5  -2    0.22    0.06
   0   5  -2    0.24    0.07
   0   5  -2    0.20    0.04
   0   5   2    0.26    0.04
   0   5   2    0.22    0.03
   0   5   2    0.23    0.09
   0   5   2    0.47    0.12
   0   5  -2    0.16    0.12
   0   5   2    0.30    0.04
   0   5   2    0.25    0.04
   0   5   2    0.25    0.05
  -1   5  -2   17.05    0.94
  -1   5  -2   14.09    0.93
  -1   5  -2   14.42    0.96
  -1   5  -2   15.10    0.91
   1   5   2   15.09    0.91
  -1   5  -2   17.01    0.89
   1   5   2   16.39    1.00
  -1   5  -2   16.89    1.02
  -1   5  -2   14.60    0.88
   1   5   2   16.85    0.92
  -2   5  -2    1.83    0.20
  -2   5  -2    1.94    0.18
   2   5   2    1.73    0.19
   2   5   2    1.82    0.22
   2   5   2    1.56    0.17
   2   5   2    1.85    0.19
  -2   5  -2    2.13    0.18
  -2   5  -2    2.36    0.24
  -3   5  -2    0.97    0.19
   3   5   2    1.01    0.15
  -3   5  -2    1.02    0.15
  -3   5  -2    0.76    0.13
   3   5   2    0.85    0.14
   3   5   2    0.89    0.14
   3   5   2    0.58    0.14
  -3   5  -2    1.02    0.16
  -4   5  -2    1.62    0.24
  -4   5  -2    1.59    0.20
   4   5   2    1.37    0.21
  -4   5  -2    1.72    0.22
   4   5   2    1.45    0.18
  -4   5  -2    1.52    0.22
   4   5   2    1.54    0.19
  -5   5  -2    4.75    0.41
   5   5   2    4.88    0.32
  -5   5  -2    4.42    0.27
  -5   5  -2    4.32    0.30
   5   5   2    4.19    0.30
  -5   5  -2    4.58    0.39
   5   5   2    4.09    0.34
  -5   5  -2    4.93    0.40
   5   5   2    4.57    0.27
   6   5   2    2.81    0.21
   6   5   2    3.47    0.25
  -6   5  -2    3.04    0.23
  -6   5  -2    3.41    0.20
   6   5   2    2.85    0.21
   6   5   2    3.38    0.20
   6   5   2    3.01    0.16
   6   5   2    3.03    0.25
  -6   5  -2    2.81    0.33
  -6   5  -2    3.25    0.34
   7   5   2    0.14    0.09
   7   5   2    0.03    0.03
   7   5   2    0.06    0.08
  -7   5  -2   -0.08    0.13
   7   5   2    0.10    0.06
  -7   5  -2   -0.06    0.07
   7   5   2    0.19    0.08
   8   5   2    4.96    0.34
   8   5   2    5.07    0.25
  -8   5  -2    4.03    0.33
   8   5   2    4.47    0.31
   8   5   2    5.44    0.30
   9   5   2    7.63    0.49
   9   5   2    7.91    0.52
   9   5   2    8.38    0.46
  10   5   2    0.53    0.12
  10   5   2    0.62    0.11
  10   5   2    0.50    0.10
  11   5   2    0.58    0.15
  11   5   2    0.62    0.12
  12   5   2    1.53    0.21
  13   5   2    1.74    0.16
  13   6  -2    5.33    0.39
 -13   6   2    7.29    0.43
  12   6  -2    1.05    0.14
  11   6  -2    1.25    0.15
  11   6  -2    1.56    0.17
  10   6  -2    5.19    0.36
  10   6  -2    5.18    0.37
   9   6  -2   17.37    1.06
   9   6  -2   17.73    0.93
   9   6  -2   17.66    0.99
  -8   6   2    4.08    0.48
   8   6  -2    4.20    0.30
   8   6  -2    4.41    0.34
   8   6  -2    4.86    0.30
   8   6  -2    4.49    0.31
  -7   6   2    3.16    0.25
   7   6  -2    3.95    0.28
   7   6  -2    3.98    0.24
   7   6  -2    3.45    0.29
   7   6  -2    3.47    0.25
  -7   6   2    3.57    0.43
  -6   6   2    2.91    0.37
   6   6  -2    2.25    0.31
   6   6  -2    3.15    0.20
  -6   6   2    2.52    0.29
   6   6  -2    2.70    0.30
  -6   6   2    2.21    0.21
   6   6  -2    2.63    0.20
   6   6  -2    2.43    0.21
   6   6  -2    2.16    0.18
  -6   6   2    2.61    0.17
   6   6  -2    2.54    0.22
   5   6  -2   18.61    0.93
  -5   6   2   18.62    1.13
   5   6  -2   17.12    1.05
  -5   6   2   17.59    0.85
   5   6  -2   18.20    1.01
  -5   6   2   15.89    1.02
   5   6  -2   17.26    0.95
   5   6  -2   16.34    1.01
   5   6  -2   18.96    1.11
   5   6  -2   17.85    1.11
   5   6  -2   17.98    0.98
  -4   6   2    8.58    0.59
   4   6  -2    8.06    0.53
  -4   6   2    9.28    0.64
   4   6  -2    7.87    0.48
   4   6  -2    7.78    0.47
  -4   6   2    7.98    0.51
  -4   6   2    8.44    0.42
  -4   6   2    8.56    0.57
  -4   6   2    8.44    0.61
   4   6  -2    7.73    0.49
   4   6  -2    8.27    0.54
  -4   6   2    8.22    0.43
   4   6  -2    8.49    0.52
   4   6  -2    8.13    0.45
   4   6  -2    8.52    0.60
  -3   6   2    4.32    0.32
   3   6  -2    3.49    0.25
  -3   6   2    4.02    0.21
   3   6  -2    3.85    0.35
   3   6  -2    3.58    0.35
   3   6  -2    3.43    0.25
  -3   6   2    3.81    0.27
  -3   6   2    3.80    0.29
  -3   6   2    3.76    0.21
   3   6  -2    3.20    0.28
  -3   6   2    4.08    0.25
  -3   6   2    4.18    0.32
   3   6  -2    3.71    0.32
  -3   6   2    3.87    0.34
  -3   6   2    4.17    0.37
   2   6  -2   36.97    2.07
   2   6  -2   35.59    1.98
  -2   6   2   35.38    2.03
  -2   6   2   38.02    1.99
   2   6  -2   36.46    2.17
   2   6  -2   32.91    2.03
  -2   6   2   37.41    2.19
   1   6  -2    8.25    0.53
  -1   6   2    8.18    0.48
   1   6  -2    9.44    0.64
  -1   6   2    7.65    0.51
  -1   6   2    8.62    0.57
  -1   6   2    8.35    0.48
  -1   6   2    8.82    0.63
  -1   6   2    8.43    0.51
   0   6   2   12.62    0.77
   0   6  -2   11.89    0.75
   0   6   2   12.79    0.85
   0   6  -2   12.93    0.87
  -1   6  -2   20.09    1.24
  -1   6  -2   20.75    1.23
  -1   6  -2   21.97    1.18
  -1   6  -2   20.09    1.17
  -1   6  -2   22.96    1.25
  -1   6  -2   22.23    1.37
   1   6   2   21.17    1.34
   1   6   2   21.99    1.24
   2   6   2    6.61    0.51
   2   6   2    6.42    0.45
  -2   6  -2    7.43    0.45
  -2   6  -2    6.73    0.44
   2   6   2    6.19    0.45
  -2   6  -2    5.77    0.45
   3   6   2   24.56    1.52
  -3   6  -2   25.15    1.50
  -3   6  -2   29.59    1.52
  -3   6  -2   25.68    1.30
   3   6   2   25.52    1.61
  -3   6  -2   27.21    1.53
   3   6   2   26.85    1.50
  -3   6  -2   26.55    1.25
  -3   6  -2   27.41    1.40
   3   6   2   25.54    1.54
   3   6   2   25.21    1.49
   3   6   2   27.03    1.64
  -3   6  -2   28.11    1.59
   3   6   2   25.46    1.36
  -4   6  -2    3.73    0.20
  -4   6  -2    4.22    0.34
   4   6   2    3.34    0.24
  -4   6  -2    3.72    0.23
   4   6   2    3.25    0.24
  -4   6  -2    3.62    0.33
   4   6   2    2.95    0.23
   4   6   2    3.67    0.31
  -4   6  -2    3.60    0.32
   4   6   2    2.92    0.24
  -4   6  -2    3.58    0.25
  -4   6  -2    3.66    0.21
   4   6   2    3.63    0.23
   4   6   2    3.81    0.27
  -5   6  -2   55.88    3.23
  -5   6  -2   56.94    3.07
   5   6   2   51.75    3.13
   5   6   2   54.08    3.06
   5   6   2   56.69    2.79
   5   6   2   59.34    3.37
   5   6   2   49.85    2.92
  -5   6  -2   54.15    3.07
  -6   6  -2    0.05    0.06
   6   6   2    0.04    0.05
  -6   6  -2    0.00    0.13
   6   6   2    0.23    0.08
   6   6   2    0.04    0.08
   6   6   2    0.10    0.05
   6   6   2    0.13    0.06
  -6   6  -2    0.06    0.14
  -7   6  -2   14.46    1.02
  -7   6  -2   14.45    0.91
   7   6   2   14.93    0.93
   7   6   2   14.13    0.86
   7   6   2   17.16    0.99
   7   6   2   16.74    0.83
  -8   6  -2   14.60    1.03
   8   6   2   15.89    0.94
   8   6   2   16.44    0.83
  -8   6  -2   15.13    0.91
   8   6   2   14.43    0.86
   9   6   2    1.40    0.19
   9   6   2    1.87    0.18
   9   6   2    1.24    0.16
  -9   6  -2    1.29    0.17
  10   6   2    0.12    0.12
  10   6   2   -0.04    0.09
  11   6   2    0.03    0.08
  12   6   2    0.07    0.08
  13   6   2    2.55    0.18
 -13   6  -2    2.17    0.18
  12   7  -2   10.37    0.57
 -12   7   2    8.13    0.61
  11   7  -2    0.94    0.11
  11   7  -2    0.90    0.13
 -11   7   2    0.63    0.11
  10   7  -2    0.21    0.12
  10   7  -2    0.03    0.11
 -10   7   2    0.08    0.08
   9   7  -2    0.38    0.13
   9   7  -2    0.26    0.09
   8   7  -2    5.83    0.35
   8   7  -2    6.21    0.41
   8   7  -2    5.93    0.38
  -8   7   2    4.57    0.37
  -7   7   2    5.00    0.38
   7   7  -2    6.27    0.38
   7   7  -2    5.87    0.41
   7   7  -2    6.03    0.37
  -7   7   2    5.30    0.44
  -7   7   2    5.17    0.52
   7   7  -2    6.11    0.35
  -7   7   2    5.60    0.32
  -7   7   2    5.42    0.33
   7   7  -2    6.57    0.42
   6   7  -2    4.27    0.30
   6   7  -2    4.11    0.27
  -6   7   2    4.55    0.26
   6   7  -2    4.08    0.31
  -6   7   2    4.17    0.24
   6   7  -2    3.48    0.26
   6   7  -2    4.32    0.30
  -6   7   2    3.93    0.41
  -6   7   2    3.42    0.44
  -6   7   2    4.07    0.29
  -6   7   2    4.18    0.35
   5   7  -2    4.10    0.30
   5   7  -2    3.97    0.30
   5   7  -2    4.29    0.29
   5   7  -2    3.69    0.26
   5   7  -2    3.98    0.27
  -5   7   2    3.58    0.28
  -5   7   2    4.12    0.33
   5   7  -2    4.04    0.26
  -5   7   2    3.55    0.39
   4   7  -2   10.22    0.69
   4   7  -2   11.65    0.62
   4   7  -2   10.58    0.60
   4   7  -2   10.61    0.62
  -4   7   2   10.33    0.71
   4   7  -2   10.66    0.58
   4   7  -2   10.44    0.63
   4   7  -2    9.34    0.72
  -4   7   2   10.30    0.76
  -4   7   2   10.80    0.65
   4   7  -2   11.10    0.65
  -4   7   2   10.53    0.79
  -3   7   2    1.29    0.17
   3   7  -2    1.43    0.13
   3   7  -2    1.27    0.14
   3   7  -2    1.59    0.14
  -3   7   2    1.45    0.25
   3   7  -2    1.56    0.15
   3   7  -2    1.38    0.15
   3   7  -2    1.41    0.22
  -3   7   2    1.50    0.11
  -3   7   2    1.35    0.17
   3   7  -2    1.64    0.16
  -3   7   2    1.61    0.14
  -3   7   2    1.44    0.14
  -3   7   2    1.41    0.22
   3   7  -2    1.32    0.15
   2   7  -2    0.75    0.10
  -2   7   2    0.86    0.11
   2   7  -2    0.80    0.10
  -2   7   2    0.73    0.08
   2   7  -2    0.79    0.11
  -2   7   2    0.95    0.12
   2   7  -2    0.80    0.10
  -2   7   2    0.72    0.10
  -2   7   2    0.57    0.15
  -2   7   2    0.80    0.11
   2   7  -2    0.64    0.17
   2   7  -2    0.74    0.10
   1   7  -2    2.92    0.21
   1   7  -2    2.75    0.21
   1   7  -2    2.46    0.14
   1   7  -2    3.38    0.23
   1   7  -2    2.81    0.21
   1   7  -2    2.84    0.22
  -1   7   2    2.91    0.21
  -1   7   2    3.07    0.20
  -1   7   2    2.93    0.15
  -1   7   2    2.64    0.29
  -1   7   2    2.69    0.22
   1   7  -2    2.55    0.20
   0   7   2    0.29    0.13
   0   7  -2    0.24    0.08
   0   7   2    0.37    0.04
   0   7  -2    0.29    0.09
   0   7  -2    0.24    0.07
   0   7  -2    0.22    0.06
   0   7   2    0.39    0.08
   0   7  -2    0.29    0.17
   0   7  -2    0.23    0.10
   0   7   2    0.36    0.08
   0   7   2    0.36    0.11
   0   7  -2    0.28    0.04
   0   7   2    0.34    0.09
   0   7   2    0.32    0.08
   0   7  -2    0.33    0.07
  -1   7  -2   11.15    0.66
  -1   7  -2   10.63    0.70
  -1   7  -2   11.97    0.63
   1   7   2   11.51    0.66
   1   7   2    9.97    0.51
  -1   7  -2   11.99    0.64
   1   7   2   10.88    0.71
   1   7   2   11.29    0.72
   1   7   2   11.26    0.62
  -1   7  -2   10.02    0.71
   1   7   2   11.49    0.80
  -1   7  -2   11.28    0.53
   1   7   2   10.27    0.59
   1   7   2   10.76    0.63
   1   7   2   11.78    0.65
  -2   7  -2    0.20    0.07
   2   7   2    0.23    0.08
   2   7   2    0.12    0.07
   2   7   2    0.12    0.06
  -2   7  -2    0.11    0.04
  -2   7  -2    0.03    0.07
   2   7   2    0.10    0.07
   2   7   2    0.10    0.07
   2   7   2    0.06    0.07
  -2   7  -2    0.10    0.06
   2   7   2    0.09    0.11
   2   7   2    0.07    0.04
  -2   7  -2    0.10    0.11
  -2   7  -2    0.13    0.07
  -2   7  -2    0.11    0.03
  -2   7  -2    0.15    0.06
  -3   7  -2   13.90    0.95
   3   7   2   15.32    0.95
   3   7   2   15.24    0.86
  -3   7  -2   14.93    0.74
  -3   7  -2   15.00    0.88
   3   7   2   14.46    0.85
   3   7   2   14.74    0.81
  -3   7  -2   15.43    0.71
  -3   7  -2   13.89    0.93
  -3   7  -2   15.87    0.81
   3   7   2   13.68    0.82
   3   7   2   13.53    0.88
   3   7   2   15.29    0.91
  -3   7  -2   15.79    0.90
  -3   7  -2   14.67    0.84
   3   7   2   13.75    0.97
   3   7   2   15.15    0.79
   4   7   2    4.03    0.29
  -4   7  -2    4.87    0.26
   4   7   2    4.13    0.32
   4   7   2    4.74    0.32
  -4   7  -2    5.13    0.34
   4   7   2    4.81    0.28
   4   7   2    5.08    0.33
   4   7   2    4.99    0.35
  -4   7  -2    4.72    0.35
  -4   7  -2    5.26    0.30
   4   7   2    4.19    0.30
  -4   7  -2    4.28    0.42
   5   7   2    3.77    0.28
   5   7   2    4.22    0.30
   5   7   2    4.17    0.27
  -5   7  -2    3.90    0.31
  -5   7  -2    3.42    0.37
  -5   7  -2    4.10    0.29
   5   7   2    3.86    0.28
   5   7   2    4.13    0.27
   6   7   2    6.55    0.43
  -6   7  -2    6.41    0.59
  -6   7  -2    6.93    0.50
  -6   7  -2    6.97    0.46
   6   7   2    6.96    0.44
   6   7   2    7.59    0.41
  -6   7  -2    6.77    0.57
   6   7   2    7.00    0.47
   6   7   2    7.41    0.45
   6   7   2    7.58    0.49
  -6   7  -2    7.30    0.39
  -6   7  -2    6.90    0.37
   7   7   2   30.64    1.48
  -7   7  -2   27.84    1.63
   7   7   2   26.60    1.55
  -7   7  -2   24.99    1.70
   7   7   2   27.83    1.66
   7   7   2   31.68    1.78
  -8   7  -2    2.13    0.21
   8   7   2    2.12    0.20
   8   7   2    1.78    0.20
   8   7   2    1.86    0.19
  -9   7  -2    0.24    0.11
   9   7   2    0.61    0.12
   9   7   2    0.55    0.15
  10   7   2    4.90    0.36
 -10   7  -2    4.50    0.36
 -11   7  -2    1.96    0.19
  11   7   2    2.65    0.20
 -12   7  -2    1.60    0.15
  12   7   2    2.12    0.16
 -11   8   2    1.95    0.17
  10   8  -2    7.49    0.46
 -10   8   2    6.94    0.48
  10   8  -2    6.24    0.41
   9   8  -2    5.30    0.34
  -9   8   2    5.25    0.40
   9   8  -2    5.69    0.39
   8   8  -2   14.69    0.78
  -8   8   2   13.47    0.85
   8   8  -2   14.84    0.83
   8   8  -2   14.72    0.88
  -8   8   2   15.03    0.96
  -7   8   2    1.42    0.13
  -7   8   2    1.37    0.18
   7   8  -2    1.89    0.21
   7   8  -2    1.87    0.18
   7   8  -2    1.61    0.20
  -7   8   2    1.28    0.16
   6   8  -2   21.41    1.23
   6   8  -2   19.60    1.15
   6   8  -2   21.00    1.35
  -6   8   2   23.79    1.04
   6   8  -2   21.49    1.20
  -6   8   2   21.13    1.25
   6   8  -2   21.45    1.13
   6   8  -2   21.55    1.27
  -6   8   2   22.40    1.39
   5   8  -2    0.85    0.13
   5   8  -2    0.57    0.12
  -5   8   2    0.82    0.14
   5   8  -2    0.76    0.11
  -5   8   2    0.67    0.14
   5   8  -2    0.75    0.10
   5   8  -2    0.76    0.10
   5   8  -2    0.67    0.11
   5   8  -2    0.63    0.12
  -5   8   2    0.57    0.23
   4   8  -2    4.56    0.30
   4   8  -2    4.75    0.31
   4   8  -2    4.37    0.29
   4   8  -2    4.36    0.28
  -4   8   2    4.32    0.31
   4   8  -2    4.37    0.31
   4   8  -2    4.56    0.31
  -4   8   2    3.57    0.40
  -4   8   2    4.16    0.45
   4   8  -2    4.74    0.32
  -4   8   2    4.36    0.35
  -4   8   2    4.19    0.29
   3   8  -2    2.79    0.23
   3   8  -2    2.45    0.19
   3   8  -2    2.97    0.23
   3   8  -2    2.70    0.22
   3   8  -2    2.88    0.23
  -3   8   2    2.97    0.17
  -3   8   2    2.77    0.25
   3   8  -2    2.72    0.22
  -3   8   2    2.85    0.26
  -3   8   2    2.44    0.34
   2   8  -2    3.01    0.36
   2   8  -2    3.22    0.24
  -2   8   2    3.33    0.18
   2   8  -2    3.24    0.25
  -2   8   2    3.31    0.25
   2   8  -2    3.48    0.25
  -2   8   2    3.20    0.28
  -2   8   2    3.24    0.25
   2   8  -2    3.37    0.25
  -2   8   2    2.96    0.37
  -2   8   2    3.14    0.35
   2   8  -2    3.10    0.26
   1   8  -2    1.65    0.17
  -1   8   2    1.94    0.20
  -1   8   2    2.13    0.18
  -1   8   2    1.93    0.12
   1   8  -2    1.82    0.16
  -1   8   2    2.10    0.31
  -1   8   2    2.13    0.20
  -1   8   2    1.78    0.26
   1   8  -2    2.13    0.20
   1   8  -2    1.94    0.19
  -1   8   2    2.24    0.21
   1   8  -2    1.72    0.17
   0   8  -2    0.74    0.05
   0   8   2    0.74    0.11
   0   8   2    0.63    0.17
   0   8  -2    0.63    0.11
   0   8  -2    0.81    0.11
   0   8   2    0.72    0.13
   0   8  -2    0.87    0.12
   0   8   2    0.72    0.11
   0   8   2    0.83    0.12
   0   8  -2    0.85    0.12
   1   8   2    0.18    0.08
  -1   8  -2    0.23    0.05
  -1   8  -2    0.10    0.08
   1   8   2    0.11    0.07
   1   8   2    0.31    0.07
  -1   8  -2    0.17    0.08
  -1   8  -2    0.16    0.07
   1   8   2    0.15    0.09
   1   8   2   -0.08    0.11
   1   8   2    0.19    0.09
  -2   8  -2   28.09    1.30
   2   8   2   28.47    1.73
  -2   8  -2   28.83    1.59
   2   8   2   25.92    1.50
   2   8   2   25.47    1.73
   2   8   2   25.82    1.42
   2   8   2   27.45    1.47
  -2   8  -2   26.82    1.73
   2   8   2   28.04    1.54
  -2   8  -2   29.15    1.47
   2   8   2   27.85    1.58
  -2   8  -2   28.39    1.53
  -3   8  -2    9.46    0.51
   3   8   2    8.57    0.48
   3   8   2    8.44    0.52
  -3   8  -2    8.83    0.60
   3   8   2    9.09    0.54
   3   8   2    9.23    0.59
  -3   8  -2    8.12    0.70
  -3   8  -2    9.16    0.44
  -3   8  -2    9.05    0.55
   3   8   2    8.07    0.50
  -3   8  -2    8.77    0.53
   3   8   2    8.06    0.54
  -3   8  -2    8.23    0.51
  -4   8  -2    1.90    0.13
   4   8   2    1.79    0.18
   4   8   2    1.92    0.19
  -4   8  -2    1.85    0.21
   4   8   2    1.61    0.17
  -4   8  -2    1.75    0.20
   4   8   2    1.63    0.17
   4   8   2    1.38    0.17
  -4   8  -2    1.53    0.28
   4   8   2    1.49    0.17
   5   8   2   24.41    1.37
   5   8   2   22.07    1.28
   5   8   2   25.74    1.26
   5   8   2   25.27    1.51
   5   8   2   22.20    1.31
  -5   8  -2   23.56    1.38
   5   8   2   24.07    1.41
  -5   8  -2   24.07    1.52
   6   8   2   70.35    3.95
   6   8   2   76.49    4.35
   6   8   2   73.81    3.61
   6   8   2   63.60    3.77
  -6   8  -2   71.86    3.97
   6   8   2   66.60    4.04
  -6   8  -2   73.27    4.36
   7   8   2   22.97    1.44
  -7   8  -2   23.64    1.11
  -7   8  -2   22.83    1.33
   7   8   2   24.07    1.21
  -7   8  -2   21.79    1.46
   7   8   2   22.42    1.36
  -8   8  -2    2.96    0.25
  -8   8  -2    2.79    0.27
   8   8   2    3.30    0.21
   8   8   2    3.13    0.27
   9   8   2    2.97    0.23
  -9   8  -2    2.12    0.22
  -9   8  -2    2.38    0.20
   9   8   2    2.84    0.19
  10   8   2    0.42    0.10
 -10   8  -2    0.19    0.07
  11   8   2    0.70    0.09
 -11   8  -2    0.57    0.09
 -10   9   2    0.26    0.06
  10   9  -2    0.38    0.08
   9   9  -2    0.99    0.11
  -9   9   2    0.90    0.12
   9   9  -2    1.15    0.13
  -8   9   2    0.78    0.13
   8   9  -2    0.93    0.13
   8   9  -2    0.96    0.11
  -7   9   2    0.08    0.10
  -7   9   2    0.12    0.07
   7   9  -2    0.11    0.06
   7   9  -2    0.07    0.10
   7   9  -2    0.07    0.10
   6   9  -2    2.03    0.16
  -6   9   2    2.07    0.21
   6   9  -2    1.96    0.18
  -6   9   2    2.26    0.19
   6   9  -2    2.08    0.19
   6   9  -2    1.90    0.17
   6   9  -2    2.03    0.17
  -5   9   2   15.14    0.84
   5   9  -2   13.93    0.78
   5   9  -2   14.12    0.84
  -5   9   2   14.96    0.93
   5   9  -2   12.99    0.74
   5   9  -2   13.59    0.90
   5   9  -2   13.42    0.81
   5   9  -2   13.96    0.80
   4   9  -2   17.75    1.01
  -4   9   2   21.12    1.25
   4   9  -2   19.09    1.14
   4   9  -2   19.41    1.07
  -4   9   2   19.61    1.13
   4   9  -2   19.37    1.05
   4   9  -2   18.75    1.11
   4   9  -2   19.16    1.21
   3   9  -2    0.13    0.09
  -3   9   2    0.23    0.07
   3   9  -2    0.13    0.08
   3   9  -2    0.09    0.11
   3   9  -2    0.01    0.08
   3   9  -2    0.21    0.08
  -3   9   2    0.15    0.08
  -3   9   2    0.30    0.09
   2   9  -2   26.82    1.63
   2   9  -2   27.14    1.75
  -2   9   2   27.18    1.77
   2   9  -2   28.67    1.50
   2   9  -2   29.24    1.54
  -2   9   2   29.18    1.62
   2   9  -2   27.81    1.60
  -2   9   2   28.48    1.56
   1   9  -2   53.04    3.01
  -1   9   2   55.78    2.81
   1   9  -2   54.79    2.87
  -1   9   2   52.72    3.01
   1   9  -2   50.33    3.29
  -1   9   2   55.71    3.31
   1   9  -2   52.25    2.80
   0   9  -2    0.70    0.11
   0   9  -2    0.63    0.21
   0   9   2    0.68    0.12
   0   9  -2    0.81    0.12
   0   9   2    0.55    0.13
   0   9  -2    0.73    0.12
   0   9   2    0.61    0.14
  -1   9  -2    2.88    0.25
  -1   9  -2    2.78    0.21
  -1   9  -2    2.22    0.23
  -1   9  -2    2.20    0.12
   1   9   2    2.20    0.21
   1   9   2    2.38    0.20
   1   9   2    2.50    0.21
   2   9   2    0.88    0.15
   2   9   2    0.81    0.14
  -2   9  -2    0.95    0.13
  -2   9  -2    1.04    0.14
   2   9   2    0.96    0.13
  -2   9  -2    1.09    0.15
   2   9   2    0.89    0.13
   2   9   2    0.77    0.11
   3   9   2    2.93    0.25
  -3   9  -2    3.66    0.28
   3   9   2    2.99    0.26
   3   9   2    3.00    0.23
   3   9   2    2.84    0.23
   3   9   2    2.87    0.22
   3   9   2    2.87    0.23
  -3   9  -2    3.16    0.27
   4   9   2    0.19    0.08
   4   9   2    0.24    0.08
   4   9   2    0.16    0.07
  -4   9  -2    0.23    0.10
  -4   9  -2    0.30    0.10
   4   9   2    0.20    0.10
   4   9   2    0.20    0.10
  -5   9  -2    0.18    0.12
   5   9   2    0.07    0.07
   5   9   2    0.01    0.08
   5   9   2    0.01    0.07
   5   9   2    0.10    0.06
   5   9   2    0.01    0.06
   5   9   2    0.01    0.06
  -5   9  -2    0.01    0.09
   6   9   2    6.37    0.40
  -6   9  -2    7.16    0.48
   6   9   2    6.30    0.43
   6   9   2    6.76    0.47
  -6   9  -2    7.22    0.44
   6   9   2    6.45    0.42
  -7   9  -2    1.46    0.19
  -7   9  -2    1.29    0.15
   7   9   2    1.32    0.18
   7   9   2    1.23    0.13
  -8   9  -2    0.46    0.11
  -8   9  -2    0.45    0.08
   8   9   2    0.35    0.09
   8   9   2    0.27    0.11
  -9   9  -2    1.90    0.19
   9   9   2    2.51    0.18
   8  10  -2    0.60    0.08
  -8  10   2    0.30    0.07
  -7  10   2    0.87    0.10
  -7  10   2    0.93    0.13
   7  10  -2    0.65    0.11
   7  10  -2    0.80    0.10
   6  10  -2    1.35    0.15
  -6  10   2    1.17    0.13
  -6  10   2    1.08    0.14
   6  10  -2    1.14    0.13
   5  10  -2    0.59    0.10
   5  10  -2    0.89    0.11
  -5  10   2    1.02    0.14
  -5  10   2    0.73    0.13
   5  10  -2    0.85    0.13
   5  10  -2    0.80    0.10
  -4  10   2   34.02    2.12
   4  10  -2   33.26    1.91
   4  10  -2   33.93    1.79
  -4  10   2   34.60    1.93
  -3  10   2    0.57    0.13
  -3  10   2    0.77    0.15
   3  10  -2    0.84    0.12
   3  10  -2    0.84    0.11
   3  10  -2    0.84    0.12
  -2  10   2   14.29    0.84
   2  10  -2   14.05    0.83
   2  10  -2   12.96    0.89
  -2  10   2   14.17    0.91
   2  10  -2   14.51    0.79
   1  10  -2    0.33    0.10
  -1  10   2    0.71    0.14
   1  10  -2    0.20    0.10
  -1  10   2    0.01    0.11
   0  10  -2    0.25    0.12
   0  10   2    0.33    0.10
   0  10   2    0.27    0.11
   0  10  -2    0.30    0.12
   0  10  -2    0.16    0.07
  -1  10  -2    1.74    0.18
   1  10   2    1.95    0.20
  -1  10  -2    1.98    0.19
   1  10   2    2.01    0.22
  -1  10  -2    1.48    0.18
   1  10   2    1.92    0.19
   2  10   2   31.49    1.72
   2  10   2   34.44    1.85
  -2  10  -2   29.51    2.02
   2  10   2   32.47    2.02
  -2  10  -2   34.70    1.86
  -3  10  -2    0.61    0.10
  -3  10  -2    0.77    0.15
   3  10   2    0.65    0.11
   3  10   2    0.76    0.11
   3  10   2    0.74    0.13
  -4  10  -2    0.52    0.11
   4  10   2    0.32    0.08
   4  10   2    0.26    0.06
   4  10   2    0.36    0.09
   4  10   2    0.34    0.08
  -4  10  -2    0.21    0.09
   5  10   2    2.43    0.19
   5  10   2    3.19    0.24
  -5  10  -2    3.21    0.24
  -5  10  -2    3.02    0.25
   5  10   2    3.18    0.23
   6  10   2    4.24    0.28
  -6  10  -2    4.37    0.28
  -6  10  -2    3.38    0.28
   6  10   2    3.95    0.24
   7  10   2    0.07    0.05
  -7  10  -2    0.14    0.07
  -7  10  -2    0.04    0.07
  -8  10  -2    0.12    0.05
  -8  10  -2    0.10    0.05
  -6  11   2    2.35    0.20
  -6  11   2    3.33    0.20
  -5  11   2    3.57    0.24
  -5  11   2    3.23    0.25
   4  11  -2    6.45    0.40
  -4  11   2    6.97    0.42
  -4  11   2    6.69    0.45
   3  11  -2   11.73    0.66
   3  11  -2   10.96    0.62
  -3  11   2   10.76    0.73
  -3  11   2   11.25    0.67
  -2  11   2    0.52    0.09
  -2  11   2    0.64    0.11
   2  11  -2    0.56    0.11
  -1  11   2    4.03    0.33
  -1  11   2    4.63    0.31
   1  11  -2    4.94    0.31
   0  11   2    0.04    0.06
   0  11  -2    0.05    0.08
   0  11   2    0.17    0.11
  -1  11  -2    5.85    0.36
   1  11   2    6.19    0.38
   1  11   2    4.60    0.37
   2  11   2   -0.02    0.10
   2  11   2    0.14    0.06
  -2  11  -2    0.22    0.11
  -3  11  -2    3.17    0.24
   3  11   2    3.58    0.24
   3  11   2    3.20    0.24
   4  11   2    4.58    0.29
  -4  11  -2    4.75    0.31
   4  11   2    4.32    0.31
  -5  11  -2   13.89    0.81
  -6  11  -2    6.49    0.39
  -3  12   2    0.32    0.07
  -2  12   2    0.02    0.05
   2  12  -2   -0.03    0.07
  -1  12   2    0.31    0.07
   0  12   2    0.72    0.09
   0  12  -2    0.77    0.09
   1  12   2    0.09    0.06
  -1  12  -2    0.11    0.07
   2  12   2    1.61    0.13
  -2  12  -2    1.42    0.14
  -3  12  -2    0.41    0.07
  15   0  -3    5.93    0.35
  14   0  -3    0.08    0.10
  13   0  -3   -0.09    0.10
  11   0  -3   18.59    1.22
  11   0  -3   19.08    0.93
  10   0  -3    0.17    0.06
  10   0  -3    0.06    0.06
  10   0  -3   -0.05    0.16
   9   0  -3    2.73    0.17
   9   0  -3    2.69    0.31
   9   0  -3    2.25    0.20
   8   0  -3    0.12    0.12
   8   0  -3   -0.07    0.10
   8   0  -3    0.46    0.15
   7   0  -3    0.21    0.11
   7   0  -3    0.44    0.12
   7   0  -3    0.20    0.09
   6   0  -3    0.26    0.09
   6   0  -3    0.20    0.09
   6   0  -3    0.02    0.10
   6   0  -3   -0.01    0.06
  -6   0   3    0.20    0.17
   5   0  -3   20.24    1.34
  -5   0   3   21.66    1.35
   5   0  -3   21.09    1.33
  -5   0   3   17.70    1.19
  -5   0   3   21.36    1.34
   5   0  -3   22.32    1.20
   5   0  -3   22.55    1.21
   5   0  -3   23.05    1.27
  -5   0   3   19.35    1.27
   4   0  -3    0.01    0.07
   4   0  -3   -0.12    0.09
  -4   0   3    0.06    0.12
   4   0  -3    0.04    0.10
   4   0  -3    0.00    0.07
  -4   0   3    0.01    0.07
   3   0  -3   50.55    2.81
   3   0  -3   50.79    2.80
  -3   0   3   45.81    2.66
  -3   0   3   50.78    2.81
  -3   0   3   52.65    2.82
   3   0  -3   50.29    2.82
   3   0  -3   47.76    2.70
  -3   0   3   46.55    2.82
   3   0  -3   49.06    2.66
   2   0  -3   -0.01    0.05
  -2   0   3    0.04    0.05
   2   0  -3   -0.02    0.03
   2   0  -3    0.23    0.09
   2   0  -3    0.00    0.08
  -2   0   3    0.00    0.07
  -2   0   3    0.28    0.10
   1   0  -3  116.19    6.59
  -1   0   3  107.54    6.15
  -1   0   3  124.14    6.38
  -1   0   3  119.05    6.38
   1   0  -3  111.55    6.19
   1   0  -3  108.77    6.25
   1   0  -3  123.61    6.41
  -1   0   3  108.99    6.56
   1   0  -3  120.31    6.38
   0   0   3   -0.04    0.03
   0   0   3   -0.03    0.04
   0   0  -3   -0.05    0.02
   0   0   3   -0.03    0.02
   0   0   3   -0.03    0.02
   0   0  -3   -0.01    0.03
   0   0  -3   -0.04    0.03
   0   0  -3    0.01    0.04
  -1   0  -3    1.51    0.14
   1   0   3    1.45    0.11
  -1   0  -3    1.36    0.11
   1   0   3    1.68    0.14
   1   0   3    1.51    0.14
  -1   0  -3    1.42    0.11
   1   0   3    1.43    0.11
  -1   0  -3    1.62    0.15
  -2   0  -3    0.00    0.04
   2   0   3    0.06    0.08
   2   0   3    0.06    0.05
  -2   0  -3    0.10    0.06
   2   0   3    0.03    0.05
  -2   0  -3    0.07    0.08
  -2   0  -3   -0.02    0.07
   2   0   3    0.00    0.07
   2   0   3    0.06    0.05
  -3   0  -3  343.56   18.59
  -3   0  -3  318.31   19.21
   3   0   3  331.05   18.60
   3   0   3  346.23   19.29
   3   0   3  353.57   18.60
  -3   0  -3  323.38   18.02
  -3   0  -3  363.16   18.61
   3   0   3  339.83   18.12
   3   0   3  323.77   18.45
  -4   0  -3   -0.11    0.11
   4   0   3    0.03    0.08
   4   0   3   -0.04    0.09
   4   0   3    0.11    0.12
  -4   0  -3   -0.06    0.08
  -4   0  -3    0.11    0.04
   4   0   3   -0.03    0.06
   4   0   3    0.10    0.08
  -4   0  -3   -0.05    0.06
  -4   0  -3   -0.05    0.07
  -5   0  -3    1.61    0.27
   5   0   3    1.74    0.19
  -5   0  -3    1.35    0.25
   5   0   3    1.67    0.27
   5   0   3    1.92    0.20
   5   0   3    2.25    0.20
   5   0   3    1.57    0.27
   6   0   3    0.01    0.10
   6   0   3    0.13    0.18
   6   0   3    0.03    0.07
   6   0   3   -0.01    0.09
   7   0   3   69.67    3.74
   7   0   3   67.33    3.96
   7   0   3   67.29    3.79
   8   0   3    0.13    0.13
   8   0   3    0.41    0.16
   8   0   3    0.27    0.15
   9   0   3    0.55    0.10
   9   0   3    0.49    0.15
   9   0   3    0.55    0.08
   9   0   3    0.58    0.20
  10   0   3    0.05    0.11
  10   0   3    0.09    0.10
  11   0   3    0.36    0.12
  11   0   3    0.34    0.21
  12   0   3    0.15    0.11
  13   0   3    9.21    0.51
  13   0   3    8.21    0.54
  14   0   3   -0.05    0.08
  15  -1  -3    0.81    0.09
  15   1  -3    0.74    0.09
  14  -1  -3    0.09    0.07
  14   1  -3    0.17    0.08
  13   1  -3    0.65    0.13
  12   1  -3    8.50    0.48
  12   1  -3    7.25    0.51
  12   1  -3    8.00    0.42
  11  -1  -3    5.14    0.48
  11   1  -3    5.51    0.34
  11   1  -3    4.81    0.35
  11   1  -3    4.47    0.51
  10  -1  -3    1.99    0.30
  10   1  -3    1.70    0.16
  10   1  -3    1.57    0.30
   9  -1  -3    0.26    0.12
   9   1  -3    0.24    0.12
   9   1  -3    0.26    0.07
   9   1  -3    0.20    0.15
   8  -1  -3    3.66    0.34
   8   1  -3    5.07    0.39
   8   1  -3    4.45    0.38
   8   1  -3    4.98    0.41
   8   1  -3    4.87    0.27
   8   1  -3    4.94    0.40
   7  -1  -3   24.35    1.53
   7  -1  -3   23.37    1.43
   7  -1  -3   24.52    1.46
   7   1  -3   25.02    1.43
   7   1  -3   25.09    1.51
   7   1  -3   26.51    1.46
   7   1  -3   25.68    1.47
   6  -1  -3    3.62    0.28
   6  -1  -3    3.51    0.32
   6  -1  -3    4.23    0.33
   6  -1  -3    3.01    0.41
   6  -1  -3    2.79    0.42
   6   1  -3    4.08    0.43
   6   1  -3    4.18    0.31
   6   1  -3    4.36    0.32
  -6   1   3    2.92    0.39
   6   1  -3    4.71    0.31
   6   1  -3    4.12    0.31
   5  -1  -3   18.55    1.27
   5  -1  -3   18.83    1.26
  -5  -1   3   19.63    1.25
   5  -1  -3   19.41    1.11
   5  -1  -3   20.83    1.18
   5  -1  -3   19.17    1.12
  -5  -1   3   19.64    1.23
   5   1  -3   20.39    1.11
  -5   1   3   19.36    1.28
  -5   1   3   18.37    1.13
  -5   1   3   19.16    1.26
   5   1  -3   19.94    1.13
   5   1  -3   17.91    1.22
  -5   1   3   19.82    1.19
   5   1  -3   19.89    1.23
   5   1  -3   20.02    1.16
   5   1  -3   19.22    1.12
   4  -1  -3   41.14    2.33
  -4  -1   3   43.11    2.45
   4  -1  -3   42.35    2.48
   4  -1  -3   44.47    2.46
   4  -1  -3   41.55    2.50
   4  -1  -3   41.26    2.32
  -4  -1   3   44.00    2.47
   4   1  -3   44.01    2.36
  -4   1   3   45.05    2.49
   4   1  -3   43.17    2.45
  -4   1   3   44.37    2.50
   4   1  -3   42.77    2.31
   4   1  -3   42.84    2.33
   4   1  -3   38.06    2.44
   4   1  -3   40.73    2.45
  -4   1   3   40.05    2.33
   4   1  -3   44.78    2.44
  -4   1   3   42.18    2.47
   3  -1  -3  319.89   17.02
  -3  -1   3  337.18   17.45
   3  -1  -3  294.11   17.25
   3  -1  -3  335.85   17.48
  -3  -1   3  339.57   17.46
   3  -1  -3  341.02   17.50
   3  -1  -3  309.07   18.08
   3   1  -3  318.98   16.99
   3   1  -3  337.64   17.46
  -3   1   3  295.58   17.92
  -3   1   3  322.44   18.12
   3   1  -3  288.44   17.93
  -3   1   3  340.33   17.50
   3   1  -3  335.99   17.22
   3   1  -3  324.02   17.45
  -3   1   3  328.73   17.49
   3   1  -3  287.70   16.86
   3   1  -3  308.94   17.99
   3   1  -3  269.34   17.83
   3   1  -3  322.07   17.35
  -3   1   3  314.16   17.02
   2  -1  -3   80.45    4.35
   2  -1  -3   77.38    4.42
   2  -1  -3   80.60    4.36
  -2  -1   3   84.62    4.32
  -2  -1   3   84.23    4.32
   2  -1  -3   73.00    4.16
  -2   1   3   77.86    4.42
   2   1  -3   82.00    4.15
  -2   1   3   72.09    4.39
   2   1  -3   79.33    4.43
  -2   1   3   81.96    4.36
   2   1  -3   68.95    4.38
   2   1  -3   73.86    4.15
  -2   1   3   74.45    4.17
  -2   1   3   78.85    4.35
   2   1  -3   80.40    4.32
   2   1  -3   82.23    4.32
   2   1  -3   71.17    4.40
   2   1  -3   76.36    4.23
   2   1  -3   76.18    4.20
   1  -1  -3   13.69    0.79
   1  -1  -3   12.65    0.73
  -1  -1   3   13.47    0.76
   1  -1  -3   14.56    0.80
  -1  -1   3   13.67    0.77
   1  -1  -3   12.18    0.77
   1   1  -3   12.32    0.76
   1   1  -3   13.05    0.76
  -1   1   3   12.95    0.73
   1   1  -3   13.01    0.74
  -1   1   3   12.62    0.77
   1   1  -3   13.75    0.77
  -1   1   3   13.96    0.79
  -1   1   3   14.46    0.79
   1   1  -3   13.35    0.76
   1   1  -3   12.63    0.74
   1   1  -3   12.89    0.72
  -1   1   3   12.00    0.77
   1   1  -3   11.54    0.72
  -1   1   3   12.59    0.77
   0  -1  -3   28.50    1.53
   0  -1   3   24.17    1.55
   0  -1  -3   23.90    1.55
   0  -1  -3   28.09    1.53
   0  -1   3   28.40    1.54
   0  -1   3   29.41    1.54
   0   1  -3   27.27    1.46
   0   1   3   25.27    1.55
   0   1   3   26.22    1.46
   0   1   3   27.89    1.53
   0   1  -3   26.50    1.48
   0   1   3   25.63    1.46
   0   1   3   28.87    1.53
   0   1  -3   25.65    1.55
   0   1   3   25.55    1.55
   0   1  -3   27.87    1.53
   0   1   3   24.54    1.45
   0   1  -3   29.33    1.54
   0   1  -3   24.96    1.46
   1  -1   3   40.90    2.19
  -1  -1  -3   41.64    2.17
   1  -1   3   36.67    2.21
   1  -1   3   40.11    2.20
  -1  -1  -3   42.21    2.18
   1  -1   3   36.92    2.09
   1   1   3   40.52    2.17
   1   1   3   35.93    2.08
  -1   1  -3   34.87    2.20
  -1   1  -3   40.77    2.19
  -1   1  -3   37.83    2.21
   1   1   3   38.83    2.08
   1   1   3   36.06    2.12
   1   1   3   36.09    2.20
  -1   1  -3   37.65    2.09
   1   1   3   37.43    2.21
  -1   1  -3   41.12    2.20
   1   1   3   37.25    2.07
   1   1   3   41.23    2.17
   2  -1   3  882.68   49.85
   2  -1   3  921.01   52.17
   2  -1   3  947.60   50.83
   2  -1   3  995.39   50.74
   2  -1   3  910.23   49.10
  -2   1  -3  970.05   50.80
  -2   1  -3  984.79   50.80
  -2   1  -3  930.72   49.16
   2   1   3 1000.00   48.75
   2   1   3  921.68   49.99
   2   1   3  931.57   50.69
   2   1   3  825.66   49.04
   2   1   3  834.47   52.07
  -2   1  -3  921.07   52.17
  -2   1  -3  861.49   51.83
  -3  -1  -3  164.55    8.61
  -3  -1  -3  158.86    8.59
   3  -1   3  149.25    8.41
   3  -1   3  167.75    8.64
   3  -1   3  155.46    8.64
   3  -1   3  155.63    8.80
   3  -1   3  157.62    8.29
  -3   1  -3  168.71    8.65
   3   1   3  135.18    8.27
  -3   1  -3  144.36    8.73
   3   1   3  153.15    8.60
   3   1   3  161.76    8.91
   3   1   3  159.43    8.59
   3   1   3  161.80    8.27
  -3   1  -3  157.55    8.29
   3   1   3  134.89    8.78
  -3   1  -3  158.09    8.80
   3   1   3  155.82    8.43
  -3   1  -3  155.32    8.62
  -4  -1  -3    7.82    0.54
  -4  -1  -3    7.48    0.55
   4  -1   3    7.72    0.59
   4  -1   3    7.57    0.46
   4  -1   3    7.81    0.48
   4  -1   3    7.21    0.49
   4  -1   3    7.02    0.57
   4   1   3    6.38    0.48
  -4   1  -3    7.11    0.46
   4   1   3    7.43    0.55
   4   1   3    7.38    0.48
   4   1   3    7.42    0.54
  -4   1  -3    7.25    0.49
  -4   1  -3    7.55    0.56
  -4   1  -3    7.98    0.59
   4   1   3    7.74    0.48
   4   1   3    7.64    0.46
  -4   1  -3    7.60    0.48
   5  -1   3   49.41    2.79
  -5  -1  -3   47.04    2.80
   5  -1   3   47.84    2.65
   5  -1   3   49.83    2.64
  -5  -1  -3   51.86    2.81
   5  -1   3   43.48    2.84
   5  -1   3   47.37    2.84
   5   1   3   50.99    2.68
  -5   1  -3   48.64    2.80
  -5   1  -3   45.96    2.64
  -5   1  -3   48.38    2.85
  -5   1  -3   47.10    2.83
   5   1   3   51.45    2.62
   5   1   3   48.36    2.77
   5   1   3   45.73    2.79
  -5   1  -3   43.95    2.72
   5   1   3   47.65    2.81
   6  -1   3   43.06    2.53
   6  -1   3   45.65    2.40
   6  -1   3   42.68    2.40
   6  -1   3   37.92    2.60
  -6   1  -3   37.20    2.58
   6   1   3   44.51    2.51
   6   1   3   45.30    2.43
   6   1   3   45.63    2.38
   7  -1   3   41.46    2.27
   7  -1   3   37.88    2.39
   7  -1   3   38.40    2.26
   7   1   3   39.20    2.37
   7   1   3   42.88    2.24
   7   1   3   40.62    2.29
   8  -1   3    1.54    0.25
   8  -1   3    1.54    0.23
   8  -1   3    1.53    0.13
   8   1   3    1.74    0.23
   8   1   3    1.56    0.13
   8   1   3    1.55    0.16
   8   1   3    1.90    0.22
   8   1   3    1.75    0.25
   8   1   3    1.58    0.24
   9   1   3    1.08    0.13
   9   1   3    0.99    0.19
   9   1   3    1.10    0.22
  10  -1   3    2.39    0.22
  10   1   3    1.89    0.31
  10   1   3    2.34    0.20
  10   1   3    2.42    0.30
  11  -1   3    1.82    0.18
  11  -1   3    1.51    0.29
  11   1   3    2.33    0.23
  11   1   3    2.24    0.18
  12  -1   3    0.08    0.10
  12   1   3    0.17    0.12
  12   1   3    0.15    0.11
  13   1   3    0.88    0.15
  13   1   3    1.08    0.14
  14  -1   3    0.84    0.10
  14   1   3    0.58    0.11
  14   1   3    0.65    0.09
  15  -2  -3    2.44    0.16
  15   2  -3    2.09    0.16
  14  -2  -3    0.17    0.08
  14   2  -3    0.02    0.10
  13   2  -3    0.97    0.13
  13   2  -3    1.05    0.13
  12   2  -3    0.72    0.14
  12   2  -3    0.76    0.14
  11  -2  -3    0.21    0.21
  11   2  -3    0.42    0.13
  11   2  -3    0.11    0.16
  11   2  -3    0.40    0.10
  10  -2  -3    0.17    0.07
  10   2  -3    0.00    0.18
  10   2  -3   -0.05    0.07
  10   2  -3    0.18    0.08
   9   2  -3    2.24    0.20
   9   2  -3    2.22    0.28
   9   2  -3    2.30    0.16
   9   2  -3    2.19    0.20
   8   2  -3   16.77    0.82
   8   2  -3   17.62    1.08
   8   2  -3   17.18    0.86
   8   2  -3   15.55    1.01
   8   2  -3   17.28    0.95
   8   2  -3   17.68    1.03
   8   2  -3   17.95    1.07
   7  -2  -3    0.62    0.16
   7  -2  -3    0.47    0.15
   7   2  -3    0.47    0.14
   7   2  -3    0.56    0.12
   7   2  -3    0.52    0.13
   7   2  -3    0.50    0.13
   6  -2  -3   29.64    1.86
   6  -2  -3   26.86    1.98
   6  -2  -3   30.67    1.77
   6   2  -3   33.47    1.79
   6   2  -3   33.03    1.77
   6   2  -3   33.16    1.72
  -6   2   3   30.76    1.87
   6   2  -3   33.80    1.82
  -6   2   3   30.13    1.77
  -6   2   3   26.04    1.94
   5  -2  -3    9.39    0.76
  -5  -2   3    9.57    0.69
   5  -2  -3    9.31    0.79
   5  -2  -3    9.37    0.63
   5  -2  -3   10.83    0.67
  -5   2   3   10.15    0.63
   5   2  -3    9.12    0.69
   5   2  -3    9.58    0.62
   5   2  -3   10.02    0.68
   5   2  -3    8.34    0.60
  -5   2   3   10.50    0.68
  -5   2   3    9.88    0.79
   5   2  -3   11.47    0.60
   5   2  -3   11.21    0.64
   5   2  -3   10.68    0.63
  -5   2   3   10.08    0.65
   5   2  -3   10.80    0.63
  -5   2   3    9.44    0.76
   4  -2  -3   87.88    4.86
   4  -2  -3   92.26    5.12
   4  -2  -3   91.12    5.15
   4  -2  -3   94.60    5.16
  -4  -2   3   94.88    5.05
  -4  -2   3   87.28    5.04
  -4   2   3   94.63    4.88
  -4   2   3   91.71    5.12
   4   2  -3   94.44    5.12
   4   2  -3   87.59    5.05
  -4   2   3   91.85    5.11
   4   2  -3   84.73    5.03
   4   2  -3   93.21    4.90
   4   2  -3   97.02    4.95
  -4   2   3   95.23    5.14
  -4   2   3   98.12    5.17
   4   2  -3   91.16    4.83
   4   2  -3   80.58    4.83
   4   2  -3   82.56    5.12
   4   2  -3   77.12    5.07
   3  -2  -3   15.47    0.95
   3  -2  -3   15.02    0.89
  -3  -2   3   16.41    0.93
   3  -2  -3   15.88    1.02
   3  -2  -3   16.40    1.00
   3   2  -3   16.05    0.90
   3   2  -3   15.77    0.91
  -3   2   3   17.06    0.91
  -3   2   3   15.57    0.93
   3   2  -3   15.91    0.93
   3   2  -3   16.11    0.93
   3   2  -3   16.17    0.86
  -3   2   3   16.98    1.02
   3   2  -3   13.45    0.91
   3   2  -3   15.56    0.91
   3   2  -3   15.01    0.86
   3   2  -3   14.88    0.91
   2  -2  -3  162.15    8.64
  -2  -2   3  169.78    8.60
   2  -2  -3  157.68    8.65
  -2  -2   3  168.62    8.60
   2  -2  -3  144.28    8.31
   2  -2  -3  139.26    8.82
   2   2  -3  160.10    8.36
   2   2  -3  168.43    8.32
   2   2  -3  156.76    8.39
   2   2  -3  159.07    8.45
   2   2  -3  160.36    8.57
  -2   2   3  139.68    8.82
   2   2  -3  140.57    8.76
  -2   2   3  160.16    8.65
   2   2  -3  149.22    8.85
   2   2  -3  160.81    8.88
   2   2  -3  159.22    8.57
  -2   2   3  153.97    8.31
  -2   2   3  155.58    8.87
   2   2  -3  153.15    8.36
  -2   2   3  159.61    8.78
  -2   2   3  154.81    8.64
   1  -2  -3    0.97    0.14
   1  -2  -3    0.88    0.13
  -1  -2   3    1.06    0.10
  -1  -2   3    0.94    0.09
   1   2  -3    0.85    0.07
  -1   2   3    1.18    0.11
  -1   2   3    1.10    0.10
   1   2  -3    0.79    0.11
   1   2  -3    0.92    0.07
  -1   2   3    0.92    0.11
   1   2  -3    0.85    0.07
   1   2  -3    1.10    0.12
  -1   2   3    0.89    0.13
  -1   2   3    1.21    0.15
   1   2  -3    0.89    0.10
   1   2  -3    0.91    0.07
  -1   2   3    0.89    0.09
   1   2  -3    0.88    0.07
   1   2  -3    0.89    0.09
  -1   2   3    0.95    0.09
   1   2  -3    0.79    0.10
   0  -2  -3  278.74   14.58
   0  -2   3  276.60   14.57
   0  -2   3  283.99   14.56
   0  -2  -3  273.45   14.56
   0   2  -3  281.36   14.58
   0   2  -3  231.51   13.92
   0   2  -3  263.20   14.95
   0   2  -3  261.64   14.08
   0   2   3  261.07   14.96
   0   2   3  243.86   14.31
   0   2   3  252.07   14.08
   0   2  -3  271.54   14.55
   0   2   3  246.06   14.94
   0   2   3  251.47   13.98
   0   2  -3  268.59   14.29
   0   2  -3  271.04   14.97
   0   2   3  278.11   14.99
   0   2   3  264.58   14.56
   0   2   3  249.86   14.09
   0   2  -3  268.45   14.11
   0   2   3  266.32   14.57
   0   2  -3  252.54   14.97
   1  -2   3   58.05    3.07
  -1  -2  -3   59.68    3.02
  -1  -2  -3   55.45    3.01
   1  -2   3   50.20    3.09
   1  -2   3   56.76    3.06
   1   2   3   52.72    2.97
  -1   2  -3   51.02    2.92
   1   2   3   52.92    3.08
   1   2   3   51.09    2.90
  -1   2  -3   58.91    3.06
   1   2   3   54.02    3.01
   1   2   3   57.61    3.01
  -1   2  -3   53.01    3.10
  -1   2  -3   54.64    3.06
  -1   2  -3   54.16    2.92
   1   2   3   54.63    3.09
   1   2   3   53.86    2.90
  -1   2  -3   53.47    3.09
   1   2   3   51.85    2.93
  -1   2  -3   51.00    3.09
   1   2   3   53.02    3.08
   1   2   3   55.81    2.90
  -2  -2  -3    5.30    0.34
  -2  -2  -3    5.38    0.35
   2  -2   3    5.29    0.41
   2  -2   3    4.51    0.33
   2  -2   3    6.03    0.42
   2  -2   3    5.35    0.34
  -2   2  -3    5.05    0.40
   2   2   3    5.00    0.31
   2   2   3    5.08    0.30
   2   2   3    5.37    0.32
   2   2   3    5.08    0.30
  -2   2  -3    5.34    0.34
   2   2   3    5.27    0.34
  -2   2  -3    4.79    0.35
  -2   2  -3    5.37    0.39
   2   2   3    4.89    0.33
   2   2   3    5.31    0.34
   2   2   3    4.95    0.32
   2   2   3    5.34    0.32
  -2   2  -3    5.40    0.34
   3  -2   3   35.65    2.09
   3  -2   3   33.46    1.97
   3  -2   3   36.20    2.14
  -3  -2  -3   36.84    2.06
  -3  -2  -3   38.34    2.05
   3  -2   3   33.58    1.97
   3  -2   3   36.17    2.12
   3   2   3   36.94    1.94
  -3   2  -3   35.83    1.98
   3   2   3   36.21    2.01
   3   2   3   33.16    1.94
   3   2   3   33.30    2.06
   3   2   3   36.20    2.05
   3   2   3   38.94    1.95
   3   2   3   35.59    1.97
  -3   2  -3   36.45    2.13
   3   2   3   37.57    2.06
   3   2   3   35.40    2.04
  -3   2  -3   36.30    2.07
  -3   2  -3   35.39    2.11
  -3   2  -3   38.27    2.09
  -4  -2  -3   60.74    3.28
  -4  -2  -3   60.21    3.27
   4  -2   3   58.04    3.33
   4  -2   3   54.65    3.36
   4  -2   3   53.98    3.14
   4   2   3   57.90    3.14
   4   2   3   55.42    3.26
   4   2   3   57.28    3.29
   4   2   3   59.46    3.19
  -4   2  -3   58.23    3.29
  -4   2  -3   58.09    3.35
  -4   2  -3   61.04    3.33
  -4   2  -3   59.76    3.15
   4   2   3   51.89    3.10
  -4   2  -3   58.34    3.34
   5  -2   3    8.08    0.53
   5  -2   3    8.26    0.56
   5  -2   3    7.62    0.48
   5  -2   3    6.61    0.67
  -5  -2  -3    6.88    0.59
   5  -2   3    8.14    0.66
  -5   2  -3    7.54    0.65
   5   2   3    8.16    0.54
   5   2   3    8.07    0.58
  -5   2  -3    8.22    0.53
   5   2   3    7.83    0.50
  -5   2  -3    7.70    0.51
   5   2   3    6.57    0.57
   5   2   3    8.44    0.51
  -5   2  -3    8.40    0.56
  -5   2  -3    8.01    0.66
   5   2   3    8.68    0.49
   6  -2   3   20.84    1.30
   6  -2   3   21.10    1.37
   6   2   3   23.69    1.32
   6   2   3   24.04    1.29
   6   2   3   23.55    1.26
   6   2   3   23.27    1.33
  -6   2  -3   20.80    1.30
  -6   2  -3   18.96    1.51
  -6   2  -3   21.49    1.37
   7  -2   3    1.76    0.23
   7  -2   3    1.81    0.27
   7   2   3    2.73    0.25
   7   2   3    1.88    0.23
   7   2   3    1.81    0.21
   8  -2   3    6.32    0.41
   8   2   3    7.27    0.37
   8   2   3    6.60    0.40
   8   2   3    8.02    0.39
   8   2   3    7.43    0.54
   8   2   3    7.73    0.52
   8   2   3    7.92    0.56
   8   2   3    7.82    0.55
   8   2   3    7.46    0.38
   8   2   3    6.46    0.44
   8   2   3    7.40    0.46
   9  -2   3    0.13    0.06
   9   2   3    0.06    0.04
   9   2   3   -0.01    0.12
   9   2   3    0.11    0.07
   9   2   3    0.00    0.08
   9   2   3    0.16    0.07
   9   2   3    0.12    0.10
  10   2   3   -0.01    0.05
  10   2   3    0.08    0.07
  10   2   3    0.05    0.07
  11  -2   3    0.15    0.10
  11   2   3    0.18    0.09
  11   2   3   -0.02    0.07
  12   2   3    0.02    0.12
  12   2   3    0.17    0.11
  13   2   3    3.39    0.24
  13   2   3    3.73    0.29
  14  -2   3    0.69    0.09
  14   2   3    0.88    0.11
  14   3  -3    3.31    0.22
  14   3  -3    3.15    0.23
  13   3  -3    1.58    0.16
  13   3  -3    1.78    0.20
  12   3  -3    3.00    0.25
  12   3  -3    3.43    0.28
  11   3  -3    0.06    0.11
  11   3  -3    0.12    0.11
  10  -3  -3    4.50    0.28
  10   3  -3    3.67    0.42
  10   3  -3    4.45    0.34
  10   3  -3    4.44    0.30
   9   3  -3    0.39    0.08
   9   3  -3    0.21    0.10
   9   3  -3    0.06    0.15
   8   3  -3    7.47    0.57
   8   3  -3    7.76    0.39
   8   3  -3    7.37    0.47
   8   3  -3    8.16    0.44
   8   3  -3    8.20    0.59
   8   3  -3    7.93    0.53
   8   3  -3    7.50    0.50
   8   3  -3    7.76    0.46
   7   3  -3    4.74    0.35
   7   3  -3    5.20    0.34
  -7   3   3    4.23    0.42
   7   3  -3    4.54    0.25
   7   3  -3    4.73    0.28
   7   3  -3    5.35    0.40
   7   3  -3    5.34    0.32
   7   3  -3    4.55    0.25
  -6   3   3   38.21    2.36
   6   3  -3   39.78    2.28
   6   3  -3   41.65    2.16
  -6   3   3   37.12    2.30
   6   3  -3   40.07    2.24
  -6   3   3   40.50    2.24
   6   3  -3   39.57    2.26
   5  -3  -3    0.26    0.21
  -5  -3   3    0.09    0.09
   5   3  -3    0.20    0.06
   5   3  -3    0.20    0.06
   5   3  -3    0.46    0.07
  -5   3   3    0.32    0.12
   5   3  -3    0.26    0.11
   5   3  -3    0.42    0.07
   5   3  -3    0.26    0.11
  -5   3   3    0.49    0.22
   5   3  -3    0.40    0.12
  -5   3   3    0.32    0.12
   4  -3  -3   16.33    1.23
   4  -3  -3   17.78    1.22
  -4  -3   3   18.35    1.08
  -4  -3   3   17.28    1.08
   4   3  -3   18.88    1.08
   4   3  -3   19.41    1.07
   4   3  -3   19.63    1.02
  -4   3   3   17.09    1.21
  -4   3   3   19.61    1.09
   4   3  -3   19.99    1.10
  -4   3   3   18.51    1.24
   4   3  -3   17.52    1.02
   4   3  -3   19.73    1.09
  -4   3   3   19.74    1.13
  -4   3   3   20.49    1.15
   4   3  -3   18.03    1.09
   4   3  -3   17.01    1.09
   4   3  -3   17.91    1.08
  -3  -3   3  103.41    5.71
   3  -3  -3   89.83    5.57
   3  -3  -3  108.26    5.86
  -3  -3   3  101.15    5.71
   3  -3  -3  105.51    5.87
   3  -3  -3   90.95    5.91
   3   3  -3  101.79    5.71
   3   3  -3  101.16    5.71
   3   3  -3  105.10    5.63
   3   3  -3  107.85    5.51
   3   3  -3   94.09    5.87
   3   3  -3   98.17    5.55
  -3   3   3  110.72    5.92
  -3   3   3  108.89    5.89
   3   3  -3  103.08    5.55
   3   3  -3  106.80    5.90
   3   3  -3  113.43    5.90
   3   3  -3  105.62    5.67
  -3   3   3  112.96    5.59
  -3   3   3  104.44    5.84
  -3   3   3  109.79    5.87
   2  -3  -3    5.38    0.43
   2  -3  -3    4.89    0.41
  -2   3   3    5.12    0.42
   2   3  -3    4.60    0.34
   2   3  -3    4.99    0.34
   2   3  -3    4.98    0.31
  -2   3   3    5.47    0.35
  -2   3   3    4.94    0.40
  -2   3   3    4.62    0.34
  -2   3   3    5.64    0.35
   2   3  -3    4.60    0.35
  -2   3   3    5.57    0.37
  -2   3   3    4.31    0.32
  -2   3   3    5.89    0.34
   1  -3  -3  292.85   14.69
  -1  -3   3  279.78   14.70
   1  -3  -3  271.44   14.69
  -1  -3   3  278.84   14.69
  -1   3   3  275.15   15.24
   1   3  -3  265.98   15.10
  -1   3   3  226.84   14.43
  -1   3   3  254.57   14.19
   1   3  -3  260.76   14.22
   1   3  -3  246.68   14.18
   1   3  -3  260.04   14.32
   1   3  -3  261.15   15.15
   1   3  -3  271.43   14.65
   1   3  -3  265.52   15.10
   1   3  -3  268.50   14.25
   1   3  -3  270.87   14.69
   1   3  -3  262.29   14.53
  -1   3   3  284.80   14.36
  -1   3   3  273.88   15.24
  -1   3   3  252.34   15.15
  -1   3   3  278.57   14.69
  -1   3   3  270.51   14.68
   0  -3  -3   95.03    5.08
   0  -3  -3   94.31    5.07
   0  -3   3   97.00    5.08
   0  -3   3   94.31    5.08
   0   3   3   99.64    5.08
   0   3  -3   93.24    4.92
   0   3  -3   94.10    5.08
   0   3  -3   87.25    4.88
   0   3   3   90.51    5.23
   0   3  -3   88.74    5.18
   0   3   3   88.43    5.18
   0   3   3   91.92    5.20
   0   3  -3   92.38    5.20
   0   3  -3   93.52    5.18
   0   3  -3   94.09    4.96
   0   3   3   86.33    4.88
   0   3  -3   84.01    4.85
   0   3   3   91.20    4.87
   0   3   3   91.34    4.88
   0   3   3   85.46    4.97
   0   3  -3   93.72    5.07
   0   3   3   90.20    5.07
   1  -3   3    0.59    0.12
   1  -3   3    0.89    0.15
  -1  -3  -3    0.57    0.07
  -1  -3  -3    0.57    0.07
   1   3   3    0.64    0.06
  -1   3  -3    0.74    0.09
   1   3   3    0.54    0.05
  -1   3  -3    0.54    0.08
  -1   3  -3    0.69    0.14
  -1   3  -3    0.55    0.11
  -1   3  -3    0.57    0.12
  -1   3  -3    0.57    0.08
   1   3   3    0.62    0.05
   1   3   3    0.58    0.09
   1   3   3    0.51    0.07
  -1   3  -3    0.78    0.10
   1   3   3    0.51    0.05
   1   3   3    0.54    0.07
   1   3   3    0.64    0.10
  -1   3  -3    0.63    0.08
   1   3   3    0.51    0.08
   2  -3   3   60.60    3.34
   2  -3   3   51.52    3.34
  -2  -3  -3   58.02    3.22
  -2  -3  -3   60.33    3.22
   2  -3   3   58.94    3.35
  -2   3  -3   50.99    3.15
   2   3   3   55.57    3.17
  -2   3  -3   59.95    3.34
   2   3   3   59.83    3.22
   2   3   3   61.06    3.14
   2   3   3   58.14    3.22
   2   3   3   58.35    3.22
  -2   3  -3   61.49    3.35
   2   3   3   60.31    3.31
  -2   3  -3   60.80    3.35
   2   3   3   60.47    3.11
   2   3   3   58.74    3.33
  -2   3  -3   60.58    3.16
   2   3   3   57.43    3.11
  -2   3  -3   59.96    3.33
   2   3   3   55.52    3.30
  -3  -3  -3   14.26    0.82
   3  -3   3   12.52    0.95
  -3  -3  -3   13.33    0.83
   3   3   3   15.37    0.82
   3   3   3   14.14    0.82
   3   3   3   14.10    0.83
  -3   3  -3   13.63    0.94
   3   3   3   14.21    0.83
  -3   3  -3   14.62    0.88
  -3   3  -3   14.31    0.83
  -3   3  -3   13.07    0.93
   3   3   3   14.71    0.86
   3   3   3   14.01    0.82
   3   3   3   14.91    0.82
  -3   3  -3   14.27    0.88
   3   3   3   14.33    0.78
   3   3   3   15.01    0.78
   4  -3   3   36.03    2.24
   4  -3   3   34.78    2.25
  -4  -3  -3   32.70    2.09
  -4  -3  -3   34.92    2.09
   4   3   3   39.34    2.11
  -4   3  -3   36.90    2.24
   4   3   3   36.02    2.10
   4   3   3   41.43    2.02
  -4   3  -3   39.80    2.06
   4   3   3   35.68    1.99
   4   3   3   38.35    2.09
   4   3   3   37.37    1.99
  -4   3  -3   38.37    2.16
   4   3   3   34.89    2.09
   4   3   3   34.10    2.11
  -4   3  -3   35.61    2.22
  -4   3  -3   39.11    2.17
   4   3   3   37.15    2.04
   5  -3   3    2.14    0.40
   5   3   3    2.68    0.23
   5   3   3    3.32    0.31
   5   3   3    2.83    0.25
  -5   3  -3    3.48    0.28
  -5   3  -3    3.79    0.31
  -5   3  -3    3.29    0.28
   5   3   3    3.32    0.23
  -5   3  -3    2.96    0.39
   5   3   3    3.02    0.22
   5   3   3    2.67    0.21
   6   3   3    0.10    0.08
  -6   3  -3    0.11    0.08
  -6   3  -3    0.18    0.12
   6   3   3    0.05    0.09
   6   3   3    0.23    0.08
  -6   3  -3    0.21    0.13
   7   3   3    0.62    0.11
   7   3   3    0.32    0.13
   7   3   3    0.36    0.06
   7   3   3    0.28    0.08
   7   3   3    0.57    0.12
   7   3   3    0.30    0.08
   7   3   3    0.32    0.09
   8   3   3    2.85    0.19
   8   3   3    2.31    0.30
   8   3   3    2.48    0.21
   8   3   3    2.72    0.32
   8   3   3    2.95    0.24
   8   3   3    2.85    0.17
   8   3   3    3.16    0.28
   8   3   3    3.10    0.28
   8   3   3    2.90    0.17
   9   3   3    0.63    0.11
   9   3   3    0.68    0.08
   9   3   3    0.54    0.10
   9   3   3    0.54    0.11
  10   3   3   27.22    1.47
  10   3   3   26.57    1.58
  11   3   3    0.59    0.12
  11   3   3    0.50    0.12
  12   3   3    1.02    0.13
  12   3   3    0.53    0.11
  13   3   3    0.05    0.08
  13   3   3   -0.04    0.08
  14   3   3    0.07    0.07
  14   4  -3    4.33    0.28
  13   4  -3    0.12    0.11
  13   4  -3    0.13    0.08
  12   4  -3    0.11    0.11
  12   4  -3    0.06    0.08
  11   4  -3    3.09    0.26
  11   4  -3    3.15    0.18
  11   4  -3    2.55    0.24
  10   4  -3    0.84    0.14
  10   4  -3    0.48    0.23
  10   4  -3    0.68    0.14
   9   4  -3    0.25    0.06
   9   4  -3    0.15    0.10
   9   4  -3    0.05    0.09
   9   4  -3    0.01    0.18
   8   4  -3    2.02    0.17
   8   4  -3    1.67    0.19
   8   4  -3    1.62    0.12
   8   4  -3    1.69    0.26
   8   4  -3    1.64    0.28
   8   4  -3    1.63    0.17
   7   4  -3    8.06    0.60
   7   4  -3    7.52    0.45
   7   4  -3    7.86    0.47
   7   4  -3    8.18    0.48
   7   4  -3    7.97    0.51
   7   4  -3    7.85    0.47
   7   4  -3    8.31    0.44
   7   4  -3    8.11    0.39
  -6   4   3    0.75    0.15
  -6   4   3    0.49    0.16
   6   4  -3    0.41    0.12
   6   4  -3    0.20    0.10
   5   4  -3   37.24    2.06
   5   4  -3   34.43    2.04
  -5   4   3   36.66    2.14
  -5   4   3   35.70    2.03
  -5   4   3   35.26    2.12
   4   4  -3   46.36    2.57
  -4   4   3   45.84    2.67
  -4   4   3   47.26    2.68
   4   4  -3   45.61    2.56
   4   4  -3   41.40    2.63
  -4   4   3   48.56    2.54
  -3   4   3   49.54    3.18
  -3   4   3   55.80    3.00
  -3   4   3   53.60    2.99
   3   4  -3   56.34    3.05
  -3   4   3   58.29    3.18
  -3   4   3   52.46    3.20
   3   4  -3   52.15    3.15
  -3   4   3   57.55    3.17
   3   4  -3   55.88    3.04
   3   4  -3   56.37    2.94
   2  -4  -3    5.51    0.46
   2  -4  -3    5.36    0.47
   2   4  -3    5.87    0.40
   2   4  -3    5.83    0.38
  -2   4   3    6.12    0.39
  -2   4   3    5.76    0.46
   2   4  -3    5.74    0.35
  -2   4   3    6.05    0.38
  -2   4   3    5.05    0.36
  -2   4   3    5.38    0.46
  -2   4   3    5.71    0.39
   2   4  -3    5.70    0.41
  -2   4   3    5.83    0.43
  -2   4   3    5.19    0.38
   1  -4  -3   10.84    0.72
   1  -4  -3   11.34    0.72
  -1   4   3   12.21    0.73
   1   4  -3   11.54    0.69
  -1   4   3   11.75    0.64
  -1   4   3    9.49    0.62
  -1   4   3   10.85    0.71
   1   4  -3   10.80    0.63
  -1   4   3   11.51    0.72
  -1   4   3   12.03    0.67
   1   4  -3   10.84    0.71
  -1   4   3   11.62    0.67
  -1   4   3   11.20    0.67
   1   4  -3   10.57    0.65
  -1   4   3   10.21    0.63
   0  -4   3   24.66    1.42
   0  -4  -3   24.69    1.40
   0  -4  -3   24.07    1.41
   0  -4   3   23.88    1.41
   0   4   3   24.60    1.36
   0   4   3   25.59    1.47
   0   4   3   23.51    1.40
   0   4   3   25.09    1.33
   0   4   3   25.68    1.32
   0   4   3   23.10    1.36
   0   4  -3   27.20    1.40
   0   4   3   25.27    1.41
   0   4  -3   22.35    1.40
   0   4  -3   23.92    1.33
   0   4  -3   26.33    1.41
   0   4  -3   24.67    1.33
   0   4   3   24.82    1.40
   0   4  -3   24.12    1.40
   0   4  -3   22.77    1.34
   0   4  -3   24.81    1.47
   0   4   3   23.34    1.40
   0   4  -3   23.86    1.42
   1  -4   3    2.27    0.27
   1  -4   3    2.57    0.26
   1   4   3    2.56    0.20
   1   4   3    2.65    0.22
  -1   4  -3    2.86    0.25
  -1   4  -3    2.58    0.26
  -1   4  -3    2.53    0.20
   1   4   3    2.38    0.21
   1   4   3    2.40    0.24
  -1   4  -3    2.65    0.19
  -1   4  -3    2.95    0.20
  -1   4  -3    2.93    0.21
  -1   4  -3    2.77    0.26
  -1   4  -3    2.67    0.21
   2  -4   3   18.77    1.22
   2  -4   3   18.17    1.22
  -2   4  -3   20.52    1.19
   2   4   3   19.62    1.12
  -2   4  -3   19.73    1.10
  -2   4  -3   17.95    1.19
   2   4   3   18.66    1.10
  -2   4  -3   19.43    1.15
   2   4   3   19.89    1.17
   2   4   3   20.24    1.10
  -2   4  -3   19.32    1.09
  -2   4  -3   19.11    1.22
  -3   4  -3    7.99    0.67
  -3   4  -3    9.56    0.56
   3   4   3    9.09    0.54
  -3   4  -3    8.92    0.61
   3   4   3    8.39    0.57
   3   4   3    8.58    0.57
  -3   4  -3    9.19    0.58
   3   4   3    7.82    0.53
  -4   4  -3   19.42    1.23
  -4   4  -3   19.54    1.24
   4   4   3   20.68    1.20
  -4   4  -3   20.23    1.18
   4   4   3   18.29    1.15
   4   4   3   22.06    1.15
   5   4   3   23.59    1.50
  -5   4  -3   27.55    1.54
  -5   4  -3   26.05    1.60
   5   4   3   26.64    1.56
  -5   4  -3   28.08    1.62
   6   4   3    5.65    0.32
  -6   4  -3    6.11    0.47
   6   4   3    5.97    0.32
   6   4   3    5.41    0.42
   6   4   3    6.34    0.40
   6   4   3    5.69    0.38
   6   4   3    5.48    0.34
   6   4   3    5.78    0.34
  -6   4  -3    5.64    0.45
   6   4   3    5.70    0.29
  -6   4  -3    5.76    0.47
   6   4   3    6.11    0.34
   7   4   3    8.52    0.51
  -7   4  -3    9.13    0.65
   7   4   3    9.27    0.47
   7   4   3    7.18    0.50
   7   4   3    8.21    0.42
  -7   4  -3    7.71    0.48
   7   4   3    8.48    0.54
   7   4   3    8.90    0.41
   7   4   3    9.71    0.57
   7   4   3    7.43    0.48
   7   4   3    8.74    0.48
   8   4   3   11.64    0.54
   8   4   3   11.48    0.70
   8   4   3   11.62    0.60
   8   4   3   11.05    0.62
   8   4   3   10.29    0.63
   8   4   3   11.26    0.55
   8   4   3   10.53    0.66
   9   4   3    2.26    0.20
   9   4   3    2.50    0.16
   9   4   3    2.59    0.24
   9   4   3    2.21    0.18
  10   4   3    6.04    0.40
  10   4   3    6.37    0.43
  10   4   3    6.18    0.38
  10   4   3    6.49    0.33
  11   4   3    1.08    0.15
  11   4   3    0.91    0.12
  12   4   3    1.44    0.17
  12   4   3    1.23    0.13
  13   4   3    0.32    0.12
  14   4   3    0.09    0.06
  13   5  -3    0.14    0.07
  13   5  -3    0.14    0.08
  12   5  -3    1.40    0.18
  12   5  -3    1.44    0.19
  11   5  -3    0.71    0.15
  11   5  -3    0.88    0.13
  10   5  -3    3.69    0.27
  10   5  -3    3.46    0.30
  -9   5   3    4.62    0.48
   9   5  -3    5.03    0.36
   9   5  -3    5.21    0.31
  -9   5   3    4.50    0.30
   9   5  -3    5.08    0.34
   9   5  -3    4.79    0.46
   9   5  -3    3.78    0.44
  -8   5   3   56.97    3.08
   8   5  -3   52.62    2.50
   8   5  -3   52.16    2.88
   8   5  -3   54.63    2.74
   8   5  -3   52.63    3.08
   7   5  -3    1.39    0.16
   7   5  -3    1.65    0.15
   7   5  -3    1.51    0.15
   7   5  -3    1.41    0.24
  -7   5   3    1.34    0.25
   7   5  -3    1.52    0.09
  -7   5   3    1.81    0.28
   7   5  -3    1.58    0.18
   6   5  -3    8.43    0.43
   6   5  -3    7.47    0.37
   6   5  -3    8.01    0.49
   6   5  -3    8.25    0.51
   6   5  -3    6.82    0.44
  -6   5   3    7.04    0.40
  -6   5   3    8.78    0.62
   6   5  -3    8.55    0.48
   6   5  -3    8.29    0.59
   6   5  -3    7.82    0.46
  -6   5   3    6.70    0.47
  -6   5   3    8.03    0.58
  -5   5   3    0.38    0.14
   5   5  -3    0.27    0.13
  -5   5   3    0.19    0.13
  -5   5   3    0.45    0.14
   5   5  -3    0.37    0.08
   5   5  -3    0.52    0.15
  -5   5   3    0.38    0.15
   5   5  -3    0.61    0.09
  -4   5   3   30.76    1.84
  -4   5   3   31.15    1.76
  -4   5   3   31.45    1.86
  -4   5   3   33.36    1.76
   4   5  -3   30.19    1.77
   4   5  -3   27.51    1.81
   4   5  -3   30.54    1.78
   3   5  -3   59.80    3.65
  -3   5   3   64.93    3.66
  -3   5   3   64.56    3.46
  -3   5   3   68.35    3.46
  -3   5   3   65.95    3.68
   3   5  -3   59.21    3.51
   3   5  -3   60.46    3.40
   3   5  -3   63.90    3.51
  -2   5   3    2.10    0.20
   2   5  -3    1.94    0.18
  -2   5   3    2.04    0.19
  -2   5   3    1.94    0.25
  -2   5   3    1.81    0.22
   2   5  -3    2.39    0.24
   2   5  -3    1.96    0.20
   2   5  -3    2.36    0.25
  -1   5   3   15.19    0.94
  -1   5   3   13.89    0.81
   1   5  -3   14.94    0.89
  -1   5   3   14.50    0.86
   1   5  -3   13.83    0.82
  -1   5   3   14.84    0.81
   1   5  -3   14.97    0.93
  -1   5   3   13.43    0.89
  -1   5   3   14.62    0.86
  -1   5   3   13.76    0.85
   0  -5   3    3.98    0.32
   0  -5  -3    3.69    0.30
   0   5  -3    4.84    0.38
   0   5   3    4.92    0.27
   0   5   3    3.77    0.30
   0   5   3    4.25    0.30
   0   5   3    4.89    0.28
   0   5  -3    4.59    0.29
   0   5  -3    4.92    0.32
   0   5  -3    4.40    0.31
   0   5   3    4.72    0.27
   0   5  -3    4.96    0.29
   0   5  -3    4.96    0.28
   0   5   3    4.82    0.28
   0   5  -3    4.67    0.27
   0   5   3    4.76    0.35
   0   5   3    4.26    0.30
   0   5   3    5.37    0.39
  -1   5  -3    0.45    0.13
   1   5   3    0.65    0.11
  -1   5  -3    0.74    0.10
   1   5   3    0.68    0.11
   1   5   3    0.79    0.16
  -1   5  -3    0.64    0.09
  -1   5  -3    0.55    0.10
  -1   5  -3    0.46    0.08
  -1   5  -3    0.67    0.10
  -2   5  -3   18.88    1.00
  -2   5  -3   18.78    1.05
   2   5   3   16.81    1.02
   2   5   3   17.47    1.00
  -2   5  -3   17.50    1.00
   2   5   3   15.88    1.00
  -2   5  -3   18.47    1.11
   2   5   3   14.71    1.07
   3   5   3    0.02    0.09
  -3   5  -3   -0.23    0.10
  -3   5  -3    0.06    0.06
  -3   5  -3    0.07    0.09
   3   5   3    0.04    0.07
   3   5   3    0.01    0.08
   3   5   3   -0.11    0.09
  -3   5  -3    0.02    0.07
  -4   5  -3   37.98    2.30
   4   5   3   38.18    2.20
   4   5   3   34.10    2.15
  -4   5  -3   40.71    2.17
  -4   5  -3   39.17    2.28
   4   5   3   40.09    2.13
  -4   5  -3   39.64    2.17
   5   5   3    1.29    0.08
   5   5   3    1.51    0.16
  -5   5  -3    1.47    0.22
   5   5   3    1.71    0.14
   5   5   3    1.47    0.16
   5   5   3    1.60    0.22
  -5   5  -3    1.38    0.12
  -6   5  -3   20.85    1.12
  -6   5  -3   23.06    1.36
   6   5   3   21.59    1.26
   6   5   3   21.66    1.04
   6   5   3   23.20    1.38
  -6   5  -3   23.78    1.43
   6   5   3   25.14    1.40
   6   5   3   24.13    1.17
   6   5   3   22.06    1.31
  -6   5  -3   20.30    1.07
   6   5   3   20.60    1.21
   7   5   3    7.13    0.35
   7   5   3    6.94    0.46
  -7   5  -3    6.69    0.59
   7   5   3    8.05    0.49
   7   5   3    7.26    0.41
  -7   5  -3    6.54    0.45
  -7   5  -3    7.40    0.42
   7   5   3    6.48    0.42
   8   5   3   16.12    0.98
  -8   5  -3   16.41    1.03
   8   5   3   18.66    1.07
   8   5   3   18.88    0.94
   8   5   3   17.92    0.83
   9   5   3    6.77    0.46
   9   5   3    6.92    0.39
  -9   5  -3    5.73    0.41
   9   5   3    6.19    0.41
   9   5   3    6.56    0.32
  10   5   3    3.30    0.29
  10   5   3    3.05    0.25
  10   5   3    3.17    0.22
  11   5   3    4.02    0.31
  12   5   3    5.59    0.38
  13   5   3    0.92    0.12
  13   6  -3    0.21    0.08
 -13   6   3    0.09    0.06
  13   6  -3    0.06    0.06
  12   6  -3    1.31    0.16
  12   6  -3    1.33    0.15
  11   6  -3    0.41    0.12
  11   6  -3    0.57    0.11
  10   6  -3    1.69    0.21
  10   6  -3    2.03    0.23
   9   6  -3    0.67    0.12
   9   6  -3    0.69    0.12
   8   6  -3    2.63    0.21
  -8   6   3    2.36    0.37
   8   6  -3    2.84    0.26
   8   6  -3    2.79    0.20
   8   6  -3    2.48    0.23
  -7   6   3    7.36    0.62
   7   6  -3    8.40    0.44
   7   6  -3    7.88    0.52
  -7   6   3    6.90    0.60
  -7   6   3    7.28    0.41
   7   6  -3    8.61    0.49
   7   6  -3    6.59    0.61
   7   6  -3    7.71    0.47
   7   6  -3    8.16    0.52
   7   6  -3   10.01    0.66
  -7   6   3    6.77    0.48
   6   6  -3   41.21    2.30
  -6   6   3   44.90    2.59
   6   6  -3   44.03    2.20
   6   6  -3   38.82    2.24
  -6   6   3   45.16    2.59
  -6   6   3   45.27    2.49
  -6   6   3   39.25    2.41
   6   6  -3   44.59    2.39
   6   6  -3   42.87    2.47
   6   6  -3   41.32    2.48
   6   6  -3   44.69    2.64
   5   6  -3   58.51    3.37
   5   6  -3   59.33    3.20
   5   6  -3   60.04    3.42
   5   6  -3   62.29    3.05
  -5   6   3   64.09    3.36
   5   6  -3   62.06    3.67
   5   6  -3   58.75    3.12
  -5   6   3   58.77    2.80
  -5   6   3   55.69    3.35
   4   6  -3    0.91    0.11
   4   6  -3    0.80    0.11
  -4   6   3    0.94    0.18
   4   6  -3    0.93    0.11
  -4   6   3    1.09    0.10
   4   6  -3    0.66    0.16
  -4   6   3    1.02    0.13
   4   6  -3    1.11    0.13
   4   6  -3    1.01    0.20
  -4   6   3    1.02    0.11
   4   6  -3    0.88    0.09
  -4   6   3    0.88    0.12
  -4   6   3    0.87    0.10
  -4   6   3    0.92    0.19
  -4   6   3    1.04    0.22
  -4   6   3    1.18    0.19
   3   6  -3   31.71    1.69
   3   6  -3   31.20    1.73
   3   6  -3   30.91    1.85
  -3   6   3   33.37    1.90
   3   6  -3   31.55    1.78
  -3   6   3   34.27    1.69
  -3   6   3   29.75    1.81
  -3   6   3   30.70    1.51
  -3   6   3   30.81    2.00
   3   6  -3   33.91    1.87
  -3   6   3   31.98    1.58
  -3   6   3   34.48    1.98
   3   6  -3   31.52    1.85
   3   6  -3   31.98    1.94
  -3   6   3   33.68    1.85
  -3   6   3   33.83    1.81
  -2   6   3    0.66    0.17
   2   6  -3    0.43    0.13
  -2   6   3    0.78    0.16
  -2   6   3    0.56    0.09
  -2   6   3    0.89    0.13
   2   6  -3    0.28    0.09
  -2   6   3    0.72    0.11
   2   6  -3    0.38    0.15
  -1   6   3   86.76    4.67
  -1   6   3   78.89    4.40
  -1   6   3   79.26    4.67
  -1   6   3   84.48    4.77
   1   6  -3   86.94    4.55
   1   6  -3   76.22    4.41
  -1   6   3   83.22    4.40
  -1   6   3   81.73    4.45
   1   6  -3   83.93    4.77
   0   6  -3   13.71    0.88
   0   6  -3   14.72    1.01
   0   6   3   15.85    0.92
   0   6   3   16.36    1.01
  -1   6  -3    0.72    0.10
   1   6   3    0.59    0.14
  -1   6  -3    0.59    0.09
  -1   6  -3    0.79    0.10
  -1   6  -3    0.56    0.12
   1   6   3    0.90    0.18
  -1   6  -3    0.57    0.08
  -1   6  -3    0.75    0.17
  -2   6  -3    8.50    0.50
   2   6   3    7.68    0.52
  -2   6  -3    8.18    0.52
   2   6   3    7.05    0.51
  -2   6  -3    7.34    0.51
   2   6   3    7.73    0.58
   3   6   3   39.42    2.39
  -3   6  -3   44.22    2.26
  -3   6  -3   42.62    2.37
   3   6   3   39.44    2.20
  -3   6  -3   40.08    2.11
  -3   6  -3   40.03    2.26
  -3   6  -3   39.92    1.98
   3   6   3   41.67    2.49
   3   6   3   38.29    2.26
   3   6   3   41.36    2.24
  -3   6  -3   38.37    2.27
   3   6   3   39.20    2.30
   3   6   3   40.43    2.06
   4   6   3    0.15    0.05
  -4   6  -3    0.18    0.06
  -4   6  -3    0.21    0.06
  -4   6  -3    0.12    0.10
   4   6   3    0.13    0.07
   4   6   3    0.12    0.07
  -4   6  -3    0.11    0.06
   4   6   3    0.11    0.10
  -4   6  -3    0.18    0.12
   4   6   3    0.08    0.07
   4   6   3    0.14    0.12
  -4   6  -3    0.06    0.06
   4   6   3    0.18    0.07
   4   6   3    0.00    0.06
  -4   6  -3    0.26    0.13
  -4   6  -3    0.12    0.07
   5   6   3   21.44    1.22
   5   6   3   21.19    1.22
   5   6   3   22.80    1.35
   5   6   3   18.25    1.16
   5   6   3   19.69    1.25
  -5   6  -3   21.91    1.24
  -5   6  -3   23.12    1.36
  -5   6  -3   22.77    1.32
   5   6   3   22.05    1.12
  -6   6  -3    0.05    0.07
   6   6   3    0.03    0.09
   6   6   3    0.04    0.07
   6   6   3    0.12    0.06
  -6   6  -3   -0.12    0.14
   6   6   3    0.05    0.06
  -6   6  -3    0.09    0.09
   6   6   3    0.02    0.07
  -6   6  -3    0.05    0.10
  -7   6  -3    0.19    0.18
   7   6   3    0.24    0.07
  -7   6  -3    0.12    0.10
   7   6   3    0.33    0.09
   7   6   3    0.16    0.08
   7   6   3    0.32    0.07
   8   6   3    8.37    0.54
   8   6   3    9.40    0.51
  -8   6  -3    8.47    0.57
   8   6   3   10.02    0.60
  -9   6  -3   10.30    0.67
   9   6   3   12.15    0.71
   9   6   3   10.15    0.64
   9   6   3   12.07    0.62
  10   6   3    0.81    0.10
  10   6   3    1.14    0.15
  11   6   3   -0.05    0.12
  12   6   3    0.71    0.11
 -13   6  -3    1.12    0.11
  12   7  -3    0.09    0.06
 -12   7   3   -0.01    0.06
  12   7  -3    0.07    0.08
 -11   7   3    1.90    0.19
  11   7  -3    2.08    0.20
  11   7  -3    2.41    0.22
  10   7  -3   -0.04    0.08
 -10   7   3   -0.06    0.07
  10   7  -3    0.05    0.11
   9   7  -3    6.91    0.47
   9   7  -3    6.72    0.44
  -9   7   3    6.74    0.50
   8   7  -3    4.24    0.31
   8   7  -3    3.95    0.30
   8   7  -3    4.01    0.26
   7   7  -3   25.51    1.51
  -7   7   3   22.96    1.46
   7   7  -3   26.19    1.34
   7   7  -3   26.62    1.42
  -7   7   3   23.89    1.60
   7   7  -3   26.60    1.46
   7   7  -3   25.85    1.60
  -7   7   3   25.55    1.63
  -7   7   3   26.93    1.24
  -6   7   3    0.71    0.14
   6   7  -3    0.84    0.14
   6   7  -3    0.70    0.11
   6   7  -3    0.87    0.11
  -6   7   3    0.71    0.20
  -6   7   3    0.67    0.11
   6   7  -3    0.61    0.11
   6   7  -3    0.78    0.13
  -5   7   3    3.62    0.28
   5   7  -3    2.72    0.22
   5   7  -3    3.28    0.26
   5   7  -3    3.31    0.22
  -5   7   3    3.30    0.26
  -5   7   3    3.10    0.39
   5   7  -3    2.92    0.24
   5   7  -3    2.71    0.36
   5   7  -3    3.09    0.23
   5   7  -3    3.09    0.24
   5   7  -3    2.91    0.24
  -4   7   3    9.59    0.64
  -4   7   3    9.56    0.69
  -4   7   3    9.61    0.72
   4   7  -3    9.51    0.51
   4   7  -3    9.36    0.54
   4   7  -3    9.35    0.56
   4   7  -3    9.58    0.56
   4   7  -3    9.18    0.58
   4   7  -3    8.46    0.55
  -4   7   3    9.22    0.58
   4   7  -3    8.98    0.68
  -4   7   3    9.58    0.47
  -4   7   3    9.19    0.55
   4   7  -3    9.50    0.61
  -3   7   3   17.84    1.11
   3   7  -3   16.96    1.02
   3   7  -3   16.05    0.90
   3   7  -3   17.04    0.94
  -3   7   3   17.17    1.01
   3   7  -3   17.79    0.97
  -3   7   3   18.01    1.10
   3   7  -3   16.28    0.99
   3   7  -3   16.11    1.09
   3   7  -3   18.75    0.99
   3   7  -3   16.73    1.09
  -3   7   3   18.77    0.83
  -2   7   3    5.22    0.33
   2   7  -3    5.16    0.33
   2   7  -3    4.79    0.35
  -2   7   3    5.18    0.27
   2   7  -3    5.42    0.32
  -2   7   3    5.65    0.43
  -2   7   3    5.35    0.47
  -2   7   3    5.06    0.34
  -2   7   3    5.31    0.38
   2   7  -3    5.05    0.34
   2   7  -3    4.98    0.34
   1   7  -3    0.52    0.04
  -1   7   3    0.69    0.18
  -1   7   3    0.57    0.10
   1   7  -3    0.53    0.09
   1   7  -3    0.57    0.10
  -1   7   3    0.69    0.06
  -1   7   3    0.70    0.09
  -1   7   3    0.72    0.10
   1   7  -3    0.54    0.09
   1   7  -3    0.51    0.09
  -1   7   3    0.82    0.17
  -1   7   3    0.86    0.10
   1   7  -3    0.55    0.10
   0   7   3    0.77    0.06
   0   7  -3    0.94    0.11
   0   7   3    0.96    0.22
   0   7  -3    0.73    0.10
   0   7   3    0.95    0.12
   0   7  -3    0.82    0.11
   0   7   3    0.84    0.11
   0   7   3    0.91    0.11
   0   7   3    0.82    0.10
   0   7  -3    1.00    0.13
   0   7   3    0.86    0.11
   0   7  -3    0.92    0.07
   0   7   3    0.99    0.16
   0   7   3    0.85    0.10
   0   7  -3    1.17    0.13
  -1   7  -3   26.38    1.31
   1   7   3   23.99    1.40
   1   7   3   22.23    1.11
   1   7   3   24.59    1.50
  -1   7  -3   25.74    1.28
   1   7   3   23.82    1.27
   1   7   3   24.32    1.53
  -1   7  -3   24.10    1.37
   1   7   3   23.33    1.24
  -1   7  -3   22.14    1.50
   1   7   3   24.44    1.37
   1   7   3   22.68    1.30
  -1   7  -3   24.21    1.13
   2   7   3    0.52    0.08
   2   7   3    0.49    0.09
  -2   7  -3    0.44    0.08
   2   7   3    0.48    0.10
  -2   7  -3    0.56    0.09
  -2   7  -3    0.57    0.10
  -2   7  -3    0.37    0.12
  -2   7  -3    0.45    0.10
   2   7   3    0.46    0.07
   2   7   3    0.42    0.12
   2   7   3    0.54    0.09
  -2   7  -3    0.52    0.08
   2   7   3    0.47    0.16
  -2   7  -3    0.56    0.05
  -2   7  -3    0.57    0.06
   2   7   3    0.58    0.10
   3   7   3    0.26    0.12
   3   7   3    0.45    0.08
  -3   7  -3    0.18    0.11
   3   7   3    0.26    0.08
  -3   7  -3    0.24    0.08
  -3   7  -3    0.26    0.10
  -3   7  -3    0.30    0.07
   3   7   3    0.19    0.08
   3   7   3    0.23    0.06
  -3   7  -3    0.29    0.14
   3   7   3    0.35    0.09
  -3   7  -3    0.28    0.13
  -3   7  -3    0.35    0.05
  -3   7  -3    0.44    0.09
   3   7   3    0.30    0.08
  -3   7  -3    0.35    0.06
  -3   7  -3    0.45    0.11
  -4   7  -3    0.86    0.11
   4   7   3    0.77    0.17
   4   7   3    0.73    0.10
   4   7   3    0.69    0.09
   4   7   3    0.53    0.10
  -4   7  -3    0.36    0.16
  -4   7  -3    0.65    0.10
   4   7   3    0.77    0.09
  -4   7  -3    0.63    0.09
   4   7   3    0.80    0.10
  -4   7  -3    0.69    0.13
   4   7   3    0.74    0.10
   5   7   3   16.89    1.05
   5   7   3   19.24    1.12
  -5   7  -3   17.15    1.14
  -5   7  -3   18.40    1.04
   5   7   3   15.48    0.97
   5   7   3   18.27    1.02
   5   7   3   18.54    0.94
  -5   7  -3   16.83    1.11
  -5   7  -3   17.26    1.13
  -6   7  -3    3.51    0.22
   6   7   3    3.79    0.26
   6   7   3    4.02    0.30
  -6   7  -3    3.16    0.41
   6   7   3    3.37    0.26
  -6   7  -3    3.55    0.27
   6   7   3    4.23    0.26
   6   7   3    3.63    0.29
  -6   7  -3    3.57    0.29
  -7   7  -3    4.43    0.48
   7   7   3    5.73    0.40
   7   7   3    5.77    0.34
  -7   7  -3    5.69    0.39
   7   7   3    5.73    0.40
   8   7   3    4.43    0.35
   8   7   3    4.57    0.29
  -8   7  -3    4.39    0.33
  -9   7  -3   17.82    1.10
   9   7   3   19.57    1.00
   9   7   3   19.51    1.14
  10   7   3    1.66    0.17
 -10   7  -3    1.31    0.16
  11   7   3    5.61    0.37
 -11   7  -3    5.42    0.39
  12   7   3    0.02    0.07
 -12   7  -3    0.04    0.05
  11   8  -3    0.19    0.07
  11   8  -3    0.25    0.09
 -11   8   3    0.11    0.06
 -10   8   3   13.02    0.89
  10   8  -3   13.91    0.77
  10   8  -3   14.26    0.83
   9   8  -3    0.49    0.12
   9   8  -3    0.65    0.11
  -9   8   3    0.59    0.11
  -9   8   3    0.79    0.09
  -8   8   3    4.75    0.37
   8   8  -3    5.06    0.34
   8   8  -3    4.90    0.34
  -7   8   3   20.75    1.28
   7   8  -3   22.42    1.32
   7   8  -3   22.75    1.24
  -7   8   3   22.30    1.43
  -7   8   3   23.99    1.08
   7   8  -3   21.99    1.17
   6   8  -3    1.36    0.16
   6   8  -3    1.84    0.16
   6   8  -3    1.44    0.15
  -6   8   3    1.58    0.18
   6   8  -3    1.29    0.16
  -6   8   3    1.70    0.19
   6   8  -3    1.53    0.16
   6   8  -3    1.78    0.20
   5   8  -3    3.37    0.26
   5   8  -3    3.76    0.28
  -5   8   3    3.98    0.46
   5   8  -3    4.29    0.29
   5   8  -3    3.79    0.30
   5   8  -3    3.82    0.25
  -5   8   3    3.83    0.30
   5   8  -3    3.67    0.28
  -5   8   3    4.00    0.31
   5   8  -3    3.75    0.27
   4   8  -3    1.23    0.13
  -4   8   3    1.36    0.16
   4   8  -3    1.38    0.15
  -4   8   3    1.30    0.27
   4   8  -3    1.09    0.13
   4   8  -3    1.60    0.18
  -4   8   3    1.17    0.14
   4   8  -3    1.55    0.17
  -4   8   3    1.42    0.19
   4   8  -3    1.54    0.17
   4   8  -3    1.26    0.15
   3   8  -3    2.34    0.18
  -3   8   3    2.50    0.15
   3   8  -3    2.17    0.20
   3   8  -3    2.52    0.22
  -3   8   3    1.93    0.23
  -3   8   3    2.01    0.31
   3   8  -3    1.56    0.26
   3   8  -3    2.32    0.18
  -3   8   3    2.51    0.23
   3   8  -3    2.40    0.21
   3   8  -3    2.46    0.21
  -2   8   3    0.51    0.06
   2   8  -3    0.58    0.11
  -2   8   3    0.60    0.11
  -2   8   3    0.50    0.16
   2   8  -3    0.54    0.09
  -2   8   3    0.51    0.12
  -2   8   3    0.37    0.17
  -2   8   3    0.56    0.10
   2   8  -3    0.59    0.12
   2   8  -3    0.32    0.15
   2   8  -3    0.73    0.12
   2   8  -3    0.57    0.09
  -1   8   3   19.99    1.08
  -1   8   3   20.10    1.12
   1   8  -3   18.34    1.11
  -1   8   3   19.54    1.22
   1   8  -3   19.50    1.04
   1   8  -3   17.49    1.20
  -1   8   3   20.36    1.04
  -1   8   3   18.78    1.17
   1   8  -3   19.07    1.06
   1   8  -3   17.66    1.12
  -1   8   3   19.39    0.90
   0   8  -3    2.81    0.24
   0   8   3    3.20    0.23
   0   8  -3    2.98    0.24
   0   8   3    3.18    0.26
   0   8  -3    2.81    0.16
   0   8   3    2.86    0.30
   0   8   3    3.15    0.26
   0   8   3    3.46    0.25
   0   8  -3    3.10    0.25
   0   8  -3    3.32    0.25
   1   8   3   19.71    1.11
   1   8   3   20.69    1.17
   1   8   3   21.94    1.23
  -1   8  -3   22.88    1.15
   1   8   3   21.72    1.15
  -1   8  -3   20.15    1.34
  -1   8  -3   21.21    1.00
  -1   8  -3   21.94    1.24
   1   8   3   21.28    1.35
   2   8   3    0.15    0.14
   2   8   3    0.39    0.10
  -2   8  -3    0.42    0.11
   2   8   3    0.49    0.11
   2   8   3    0.45    0.08
   2   8   3    0.60    0.12
  -2   8  -3    0.62    0.13
  -2   8  -3    0.40    0.09
   2   8   3    0.27    0.10
  -2   8  -3    0.47    0.06
  -2   8  -3    0.34    0.08
  -3   8  -3    0.19    0.11
  -3   8  -3    0.05    0.09
   3   8   3    0.07    0.06
  -3   8  -3    0.12    0.07
   3   8   3    0.19    0.06
   3   8   3    0.04    0.06
   3   8   3    0.10    0.06
  -3   8  -3    0.03    0.06
  -3   8  -3    0.06    0.06
  -3   8  -3    0.10    0.08
   3   8   3    0.00    0.06
  -3   8  -3    0.07    0.06
   4   8   3    1.06    0.14
   4   8   3    1.09    0.15
   4   8   3    1.03    0.12
   4   8   3    0.92    0.12
  -4   8  -3    1.26    0.16
  -4   8  -3    0.89    0.14
   4   8   3    1.00    0.13
   4   8   3    0.96    0.12
   5   8   3    0.51    0.11
   5   8   3    0.52    0.09
   5   8   3    0.48    0.11
   5   8   3    0.40    0.11
  -5   8  -3    0.56    0.10
   5   8   3    0.48    0.10
  -5   8  -3    0.69    0.12
   6   8   3   13.17    0.88
   6   8   3   13.60    0.73
   6   8   3   13.47    0.80
  -6   8  -3   13.79    0.90
   6   8   3   13.07    0.83
  -6   8  -3   14.48    0.82
  -7   8  -3    4.93    0.40
  -7   8  -3    5.46    0.40
   7   8   3    5.47    0.38
   7   8   3    5.72    0.40
   7   8   3    6.25    0.34
  -8   8  -3    0.57    0.13
   8   8   3    0.66    0.11
   8   8   3    0.53    0.11
  -8   8  -3    0.62    0.11
  -9   8  -3   26.82    1.84
  -9   8  -3   28.03    1.67
   9   8   3   32.32    1.53
   9   8   3   31.13    1.72
  10   8   3    0.85    0.12
 -10   8  -3    0.67    0.10
  11   8   3    0.22    0.09
  10   9  -3    1.42    0.12
 -10   9   3    1.00    0.12
   9   9  -3    0.76    0.10
   9   9  -3    0.62    0.10
  -9   9   3    0.63    0.10
   8   9  -3    1.91    0.19
   8   9  -3    1.99    0.18
  -8   9   3    1.89    0.20
  -7   9   3    1.45    0.15
   7   9  -3    1.76    0.19
   7   9  -3    1.69    0.17
  -7   9   3    1.69    0.20
   6   9  -3    0.01    0.05
  -6   9   3    0.05    0.07
   6   9  -3    0.11    0.11
   6   9  -3    0.16    0.07
   6   9  -3    0.14    0.10
  -6   9   3    0.18    0.08
   5   9  -3    9.04    0.59
  -5   9   3   10.68    0.62
   5   9  -3    9.86    0.58
   5   9  -3   10.45    0.63
   5   9  -3    9.05    0.54
   5   9  -3   10.34    0.60
  -5   9   3   10.77    0.69
  -4   9   3    1.21    0.16
   4   9  -3    1.27    0.15
   4   9  -3    1.06    0.14
   4   9  -3    1.11    0.14
   4   9  -3    1.24    0.15
  -4   9   3    1.18    0.17
   4   9  -3    1.16    0.13
  -3   9   3   10.89    0.70
   3   9  -3    9.51    0.66
   3   9  -3    9.58    0.62
   3   9  -3   10.24    0.62
  -3   9   3   10.27    0.63
   3   9  -3   10.29    0.60
  -3   9   3    9.95    0.60
   3   9  -3   10.84    0.61
  -2   9   3   11.78    0.77
   2   9  -3   10.39    0.74
   2   9  -3   11.75    0.70
   2   9  -3   11.55    0.65
  -2   9   3   11.90    0.68
  -2   9   3   11.04    0.70
   2   9  -3   11.70    0.67
   2   9  -3   11.47    0.70
   1   9  -3   29.70    1.58
  -1   9   3   29.23    1.70
  -1   9   3   29.90    1.58
   1   9  -3   30.01    1.69
   1   9  -3   27.42    1.84
  -1   9   3   30.31    1.87
   1   9  -3   30.82    1.62
   0   9   3   26.96    1.44
   0   9   3   26.80    1.55
   0   9  -3   24.76    1.68
   0   9  -3   27.94    1.45
   0   9  -3   27.49    1.55
   0   9   3   27.48    1.70
  -1   9  -3   22.25    1.17
   1   9   3   21.01    1.16
   1   9   3   21.72    1.25
  -1   9  -3   20.86    1.01
  -1   9  -3   22.28    1.26
   1   9   3   21.67    1.22
  -1   9  -3   20.53    1.36
   1   9   3   22.26    1.37
   2   9   3    1.25    0.15
   2   9   3    1.56    0.19
  -2   9  -3    1.61    0.10
   2   9   3    1.39    0.16
   2   9   3    1.27    0.16
  -2   9  -3    1.65    0.19
  -2   9  -3    1.38    0.15
   2   9   3    1.26    0.14
  -2   9  -3    1.44    0.17
   3   9   3   21.20    1.32
   3   9   3   20.93    1.18
   3   9   3   20.52    1.10
  -3   9  -3   20.45    1.33
  -3   9  -3   22.36    1.23
   3   9   3   20.04    1.13
   3   9   3   20.82    1.21
  -4   9  -3    6.07    0.44
  -4   9  -3    6.52    0.44
   4   9   3    6.17    0.37
   4   9   3    6.15    0.40
  -4   9  -3    6.63    0.33
   4   9   3    5.64    0.39
   4   9   3    6.23    0.44
   5   9   3    0.96    0.14
  -5   9  -3    0.79    0.13
   5   9   3    0.63    0.12
   5   9   3    0.98    0.12
   5   9   3    0.95    0.13
  -5   9  -3    1.32    0.15
   6   9   3   14.68    0.92
   6   9   3   13.98    0.84
  -6   9  -3   13.79    0.93
  -6   9  -3   15.23    0.86
   6   9   3   13.76    0.87
   6   9   3   15.17    0.78
   7   9   3    8.98    0.48
  -7   9  -3    8.28    0.58
  -7   9  -3    9.33    0.55
   7   9   3    8.10    0.54
  -8   9  -3    1.07    0.13
   8   9   3    1.08    0.13
  -8   9  -3    0.99    0.12
   8   9   3    1.21    0.12
   9   9   3    1.60    0.14
  -9   9  -3    1.30    0.12
  -9   9  -3    1.06    0.12
   8  10  -3    0.09    0.08
  -8  10   3    0.13    0.06
  -7  10   3    0.05    0.09
   7  10  -3    0.11    0.07
  -7  10   3    0.20    0.06
   7  10  -3    0.12    0.06
  -6  10   3    2.89    0.24
   6  10  -3    2.53    0.19
  -6  10   3    2.99    0.21
   6  10  -3    2.77    0.20
   6  10  -3    3.03    0.23
   5  10  -3    9.13    0.53
   5  10  -3    8.94    0.56
  -5  10   3    8.77    0.61
   5  10  -3    9.33    0.54
  -5  10   3    9.32    0.57
   4  10  -3    0.83    0.11
   4  10  -3    0.62    0.09
  -4  10   3    0.58    0.11
   4  10  -3    0.70    0.11
   3  10  -3   14.45    0.80
   3  10  -3   13.13    0.77
  -3  10   3   13.42    0.83
   3  10  -3   13.85    0.82
  -3  10   3   14.62    0.92
   2  10  -3    1.37    0.16
  -2  10   3    1.26    0.16
   2  10  -3    1.39    0.17
  -2  10   3    1.59    0.18
  -1  10   3   45.12    2.86
  -1  10   3   47.24    2.61
   1  10  -3   45.29    2.60
   1  10  -3   47.06    2.43
   0  10   3    4.15    0.30
   0  10  -3    4.11    0.30
   0  10  -3    3.90    0.28
   0  10   3    3.91    0.32
  -1  10  -3    5.13    0.36
  -1  10  -3    4.75    0.37
  -1  10  -3    5.17    0.36
   1  10   3    5.41    0.35
   1  10   3    5.09    0.37
  -2  10  -3   19.18    1.08
   2  10   3   19.02    1.07
   2  10   3   19.23    1.17
  -2  10  -3   16.05    1.16
   3  10   3    4.07    0.30
  -3  10  -3    3.69    0.30
  -3  10  -3    4.07    0.30
   3  10   3    4.10    0.29
   3  10   3    3.63    0.25
  -4  10  -3    0.12    0.06
   4  10   3    0.24    0.06
   4  10   3    0.31    0.10
  -4  10  -3    0.14    0.09
   4  10   3    0.29    0.08
   5  10   3    0.45    0.08
  -5  10  -3    0.57    0.09
   5  10   3    0.56    0.11
   5  10   3    0.62    0.08
  -5  10  -3    0.50    0.10
  -6  10  -3    2.22    0.20
   6  10   3    1.93    0.14
   6  10   3    1.57    0.15
   7  10   3    1.36    0.13
  -7  10  -3    1.02    0.13
  -8  10  -3    0.36    0.07
  -6  11   3    1.44    0.13
  -5  11   3    5.56    0.38
  -5  11   3    5.64    0.35
  -4  11   3    0.27    0.07
  -4  11   3    0.30    0.08
   4  11  -3    0.39    0.08
   3  11  -3   14.96    0.88
  -3  11   3   15.10    0.89
   3  11  -3   16.26    0.84
  -3  11   3   14.95    0.98
   2  11  -3    2.75    0.21
   2  11  -3    3.17    0.22
  -2  11   3    2.67    0.24
  -2  11   3    2.76    0.22
  -1  11   3   13.48    0.80
  -1  11   3   13.26    0.88
   1  11  -3   14.16    0.80
   0  11   3    5.47    0.44
   0  11  -3    7.30    0.42
   0  11   3    6.88    0.42
  -1  11  -3   10.57    0.63
   1  11   3   10.46    0.62
   1  11   3   10.05    0.67
   2  11   3    0.00    0.07
  -2  11  -3    0.16    0.08
   2  11   3   -0.07    0.05
   3  11   3   -0.01    0.08
   3  11   3    0.13    0.07
  -3  11  -3    0.09    0.08
   4  11   3    0.44    0.07
   4  11   3    0.31    0.07
  -4  11  -3    0.68    0.10
  -5  11  -3    1.64    0.14
   5  11   3    1.27    0.12
  -6  11  -3    0.25    0.07
  -3  12   3    1.84    0.14
   2  12  -3    0.89    0.09
  -2  12   3    1.07    0.11
   1  12  -3    1.48    0.12
  -1  12   3    1.22    0.12
   0  12   3    0.00    0.04
   0  12   3   -0.04    0.05
   0  12  -3   -0.03    0.05
  -1  12  -3    1.12    0.12
   1  12   3    0.98    0.11
   2  12   3   -0.01    0.05
  -2  12  -3    0.08    0.06
  15   0  -4    0.06    0.07
  14   0  -4    1.99    0.19
  13   0  -4   -0.04    0.10
  11   0  -4    0.05    0.19
  10   0  -4   33.81    2.01
   9   0  -4    0.02    0.13
   9   0  -4   -0.08    0.07
   8   0  -4    0.14    0.11
   8   0  -4    0.30    0.07
   8   0  -4    0.05    0.12
   8   0  -4    0.15    0.11
   7   0  -4    0.02    0.09
   7   0  -4    0.11    0.10
   7   0  -4    0.06    0.08
   6   0  -4   19.46    1.10
   6   0  -4   19.68    1.15
   6   0  -4   19.48    1.10
   6   0  -4   17.83    1.25
  -6   0   4   16.51    1.24
  -5   0   4    0.10    0.14
  -5   0   4    0.04    0.08
   5   0  -4    0.04    0.08
  -5   0   4    0.00    0.08
  -5   0   4    0.06    0.12
   5   0  -4   -0.04    0.12
   5   0  -4    0.03    0.08
   5   0  -4    0.02    0.12
   5   0  -4    0.04    0.07
   4   0  -4    3.70    0.27
  -4   0   4    3.36    0.35
  -4   0   4    3.21    0.26
   4   0  -4    3.63    0.26
  -4   0   4    3.09    0.28
   4   0  -4    3.71    0.34
  -4   0   4    3.80    0.35
   4   0  -4    3.71    0.35
   4   0  -4    3.87    0.27
   3   0  -4   -0.03    0.07
   3   0  -4    0.02    0.07
   3   0  -4   -0.02    0.04
  -3   0   4   -0.06    0.06
   3   0  -4    0.06    0.05
  -3   0   4    0.06    0.08
  -3   0   4   -0.05    0.04
   3   0  -4    0.04    0.06
  -3   0   4    0.15    0.06
  -2   0   4  393.73   22.35
   2   0  -4  408.52   22.36
   2   0  -4  421.65   23.04
  -2   0   4  417.74   23.08
  -2   0   4  454.67   23.12
  -2   0   4  404.54   23.72
   2   0  -4  415.24   23.72
   2   0  -4  430.85   23.10
   1   0  -4    0.07    0.05
   1   0  -4    0.00    0.05
  -1   0   4    0.03    0.04
  -1   0   4    0.09    0.06
  -1   0   4    0.02    0.03
   1   0  -4    0.00    0.03
   1   0  -4    0.05    0.04
  -1   0   4    0.04    0.05
   1   0  -4    0.05    0.03
   0   0   4  115.79    6.05
   0   0  -4  114.78    6.02
   0   0   4  113.28    6.02
   0   0  -4  114.94    6.02
   0   0  -4  105.12    6.19
   0   0   4   99.13    5.79
   0   0  -4  106.42    5.82
   0   0  -4  102.40    5.86
   0   0   4  106.74    5.83
   0   0   4  111.25    6.20
   1   0   4    0.58    0.10
  -1   0  -4    0.58    0.09
  -2   0  -4    2.43    0.22
  -2   0  -4    2.20    0.18
   2   0   4    2.31    0.18
  -2   0  -4    2.34    0.23
  -2   0  -4    2.31    0.18
   2   0   4    2.51    0.23
   2   0   4    2.42    0.18
   2   0   4    2.24    0.18
   2   0   4    2.38    0.23
   3   0   4   -0.12    0.05
   3   0   4   -0.11    0.07
   3   0   4   -0.11    0.09
   3   0   4   -0.12    0.06
  -3   0  -4   -0.15    0.04
  -3   0  -4   -0.05    0.08
  -3   0  -4   -0.05    0.06
   3   0   4   -0.09    0.07
  -3   0  -4   -0.19    0.08
   4   0   4    2.37    0.29
   4   0   4    2.63    0.21
  -4   0  -4    2.85    0.31
   4   0   4    2.68    0.22
   4   0   4    3.17    0.23
   4   0   4    2.49    0.30
  -4   0  -4    2.29    0.22
  -4   0  -4    2.29    0.18
  -4   0  -4    2.50    0.29
  -4   0  -4    2.19    0.22
   5   0   4    0.05    0.08
  -5   0  -4    0.03    0.09
  -5   0  -4    0.05    0.13
   5   0   4    0.05    0.09
   5   0   4    0.04    0.06
   6   0   4   44.32    2.94
   6   0   4   51.98    2.74
   6   0   4   51.16    2.78
   6   0   4   49.89    2.90
   7   0   4    0.08    0.11
   7   0   4    0.20    0.12
   7   0   4    0.31    0.14
   8   0   4  161.55    8.53
   8   0   4  180.01    9.59
   8   0   4  169.12    9.13
   8   0   4  183.03   10.03
   8   0   4  183.95    9.45
   9   0   4    0.29    0.13
   9   0   4   -0.03    0.15
   9   0   4    0.17    0.06
  10   0   4   25.06    1.49
  10   0   4   25.40    1.43
  10   0   4   22.54    1.58
  11   0   4    0.04    0.08
  11   0   4   -0.15    0.18
  12   0   4    5.08    0.35
  13   0   4    0.09    0.11
  13   0   4    0.16    0.11
  14   0   4    0.90    0.10
  15  -1  -4    0.05    0.06
  15   1  -4    0.09    0.06
  14  -1  -4    3.04    0.23
  14   1  -4    3.50    0.25
  13   1  -4    0.65    0.13
  12  -1  -4    0.09    0.08
  12   1  -4    0.13    0.08
  12   1  -4    0.13    0.10
  12   1  -4    0.10    0.06
  11  -1  -4   29.96    1.84
  11   1  -4   32.83    1.65
  11   1  -4   27.93    1.84
  11   1  -4   28.10    1.75
  11   1  -4   31.66    1.51
  10  -1  -4    6.94    0.55
  10   1  -4    6.38    0.44
  10   1  -4    8.08    0.60
   9  -1  -4   15.02    0.82
   9  -1  -4   16.47    1.04
   9   1  -4   15.65    0.95
   9   1  -4   17.26    1.04
   8  -1  -4    0.47    0.14
   8  -1  -4    0.30    0.15
   8   1  -4    0.47    0.13
   8   1  -4    0.46    0.14
   8   1  -4    0.79    0.08
   8   1  -4    0.70    0.09
   8   1  -4    0.73    0.16
   8   1  -4    0.53    0.16
   7  -1  -4    0.69    0.12
   7  -1  -4    0.56    0.15
   7  -1  -4    0.82    0.15
   7   1  -4    0.77    0.15
   7   1  -4    0.67    0.14
   7   1  -4    0.82    0.16
   7   1  -4    0.72    0.14
   6  -1  -4    0.22    0.20
   6  -1  -4    0.78    0.15
   6  -1  -4    0.65    0.14
   6  -1  -4    0.44    0.18
   6  -1  -4    0.48    0.10
   6   1  -4    0.60    0.12
   6   1  -4    0.58    0.11
   6   1  -4    0.98    0.14
  -6   1   4    0.18    0.19
   6   1  -4    0.76    0.14
  -5  -1   4   13.74    1.00
   5  -1  -4   15.82    1.05
   5  -1  -4   16.57    0.91
   5  -1  -4   14.25    1.04
   5  -1  -4   15.64    0.95
  -5  -1   4   14.67    1.00
   5  -1  -4   15.58    0.89
   5   1  -4   16.04    0.90
   5   1  -4   15.37    0.88
   5   1  -4   14.98    1.00
   5   1  -4   13.65    1.00
  -5   1   4   15.67    1.06
   5   1  -4   16.47    0.93
  -5   1   4   14.72    0.95
  -5   1   4   14.80    0.91
   5   1  -4   15.86    0.91
  -5   1   4   15.16    1.03
  -4  -1   4   34.12    2.03
   4  -1  -4   35.24    2.06
   4  -1  -4   35.57    2.07
   4  -1  -4   35.56    1.91
   4  -1  -4   35.27    2.01
  -4  -1   4   35.73    2.03
   4   1  -4   36.19    1.93
  -4   1   4   33.88    1.91
   4   1  -4   34.51    2.01
   4   1  -4   35.81    2.00
   4   1  -4   30.87    1.99
  -4   1   4   34.59    2.06
  -4   1   4   35.54    2.03
   4   1  -4   29.07    1.88
   4   1  -4   33.37    2.02
   4   1  -4   34.96    1.91
  -4   1   4   35.61    2.07
   4   1  -4   35.77    1.89
   3  -1  -4  110.67    5.98
  -3  -1   4  109.75    5.95
  -3  -1   4  109.56    5.95
   3  -1  -4  106.10    6.07
   3  -1  -4  112.20    5.99
   3  -1  -4  103.95    5.72
   3   1  -4  112.90    5.95
   3   1  -4  107.07    5.71
   3   1  -4  104.99    5.94
  -3   1   4  108.92    5.98
   3   1  -4  110.01    5.82
   3   1  -4  105.70    5.76
  -3   1   4  114.77    6.00
   3   1  -4   93.55    5.71
   3   1  -4  108.31    6.05
   3   1  -4   98.82    6.06
  -3   1   4  106.02    6.08
  -3   1   4  103.12    5.73
  -2  -1   4   66.59    3.52
   2  -1  -4   63.50    3.54
   2  -1  -4   58.12    3.58
   2  -1  -4   60.01    3.38
   2  -1  -4   65.62    3.55
  -2  -1   4   67.32    3.52
   2   1  -4   61.28    3.41
   2   1  -4   66.27    3.52
  -2   1   4   66.75    3.54
   2   1  -4   55.72    3.37
  -2   1   4   60.74    3.59
   2   1  -4   63.49    3.57
  -2   1   4   67.58    3.56
   2   1  -4   64.90    3.37
   2   1  -4   60.38    3.43
  -2   1   4   62.87    3.39
   2   1  -4   56.12    3.57
   2   1  -4   64.57    3.52
   1  -1  -4    7.18    0.46
  -1  -1   4    8.08    0.47
   1  -1  -4    8.01    0.49
  -1  -1   4    7.16    0.46
  -1  -1   4    7.96    0.48
   1  -1  -4    7.33    0.44
   1  -1  -4    7.75    0.49
   1   1  -4    7.78    0.47
  -1   1   4    7.28    0.44
   1   1  -4    7.86    0.48
   1   1  -4    7.61    0.46
  -1   1   4    7.62    0.49
   1   1  -4    7.79    0.45
   1   1  -4    7.29    0.44
  -1   1   4    8.36    0.50
   1   1  -4    7.54    0.43
   1   1  -4    6.70    0.43
  -1   1   4    7.29    0.46
  -1   1   4    7.03    0.43
   0  -1   4   69.45    4.29
   0  -1   4   79.35    4.21
   0  -1  -4   69.85    4.29
   0  -1  -4   79.32    4.20
   0  -1  -4   81.53    4.21
   0  -1   4   83.27    4.21
   0   1   4   72.60    4.04
   0   1  -4   78.37    4.21
   0   1  -4   73.66    4.29
   0   1   4   72.23    4.02
   0   1  -4   74.03    4.05
   0   1  -4   74.81    4.09
   0   1   4   76.36    4.29
   0   1   4   78.51    4.20
   1  -1   4   45.58    2.37
  -1  -1  -4   42.41    2.34
  -1  -1  -4   43.46    2.35
   1  -1   4   41.31    2.25
   1  -1   4   39.70    2.39
   1  -1   4   43.83    2.37
   1   1   4   42.49    2.38
   1   1   4   42.24    2.35
   1   1   4   40.04    2.29
   1   1   4   40.62    2.23
  -1   1  -4   44.19    2.37
  -1   1  -4   40.47    2.39
   1   1   4   40.87    2.24
   1   1   4   42.28    2.34
  -1   1  -4   42.43    2.25
   1   1   4   37.39    2.24
   1   1   4   36.44    2.37
  -1   1  -4   43.60    2.36
   2  -1   4  336.42   20.93
   2  -1   4  379.72   20.36
   2  -1   4  374.49   19.75
  -2  -1  -4  386.07   20.35
   2  -1   4  387.11   20.39
  -2  -1  -4  402.59   20.37
   2   1   4  334.49   19.61
   2   1   4  387.07   19.63
   2   1   4  363.41   20.12
  -2   1  -4  371.95   19.81
   2   1   4  325.98   20.84
   2   1   4  372.03   19.70
  -2   1  -4  392.47   20.45
   2   1   4  376.63   20.24
  -2   1  -4  348.58   20.97
   2   1   4  354.49   20.92
  -2   1  -4  338.78   20.80
   2   1   4  373.73   20.31
  -2   1  -4  403.30   20.46
  -3  -1  -4   49.28    2.70
   3  -1   4   46.41    2.60
  -3  -1  -4   49.08    2.71
   3  -1   4   47.44    2.58
   3  -1   4   49.32    2.74
   3  -1   4   46.24    2.74
   3  -1   4   47.93    2.73
   3   1   4   47.95    2.56
   3   1   4   46.28    2.70
  -3   1  -4   45.94    2.69
  -3   1  -4   47.18    2.73
  -3   1  -4   49.14    2.58
   3   1   4   48.94    2.72
  -3   1  -4   48.25    2.73
   3   1   4   40.72    2.71
   3   1   4   45.69    2.61
  -3   1  -4   51.30    2.75
   3   1   4   46.14    2.69
   4  -1   4   12.13    0.74
  -4  -1  -4   13.31    0.83
   4  -1   4   13.03    0.76
   4  -1   4   12.69    0.79
   4  -1   4   12.88    0.87
   4  -1   4   11.81    0.87
  -4  -1  -4   13.65    0.85
   4   1   4   13.67    0.74
   4   1   4   13.55    0.76
  -4   1  -4   12.52    0.86
  -4   1  -4   14.28    0.90
   4   1   4   11.20    0.77
   4   1   4   10.47    0.73
  -4   1  -4   12.37    0.79
  -4   1  -4   12.48    0.76
   4   1   4   12.75    0.83
   4   1   4   13.15    0.77
  -4   1  -4   11.50    0.75
   4   1   4   12.54    0.84
   5  -1   4   13.48    0.79
  -5  -1  -4   13.86    0.91
   5  -1   4   13.51    0.85
  -5  -1  -4   12.67    0.91
   5  -1   4   11.79    0.95
  -5   1  -4   13.15    0.94
   5   1   4   15.22    0.84
  -5   1  -4   13.48    0.85
  -5   1  -4   12.90    0.81
   5   1   4   12.69    0.91
  -5   1  -4   13.11    0.95
   5   1   4   14.08    0.82
  -5   1  -4   12.52    0.79
   6  -1   4    2.48    0.24
   6  -1   4    2.44    0.27
   6  -1   4    2.60    0.27
   6  -1   4    2.21    0.39
   6   1   4    2.92    0.25
   6   1   4    3.10    0.26
   6   1   4    2.86    0.28
  -6   1  -4    2.30    0.38
   7  -1   4    6.18    0.45
   7  -1   4    6.22    0.50
   7  -1   4    6.29    0.47
   7   1   4    6.53    0.46
   7   1   4    6.32    0.48
   8  -1   4    5.11    0.46
   8  -1   4    5.19    0.32
   8   1   4    5.31    0.31
   8   1   4    6.15    0.45
   8   1   4    5.63    0.36
   8   1   4    5.91    0.47
   8   1   4    6.30    0.45
   9  -1   4   11.72    0.95
   9   1   4   14.21    0.89
   9   1   4   14.07    0.82
   9   1   4   13.91    0.94
  10  -1   4    4.18    0.30
  10   1   4    4.37    0.44
  10   1   4    4.24    0.32
  10   1   4    3.75    0.41
  11  -1   4   14.28    0.86
  11  -1   4   12.80    0.96
  11   1   4   14.89    0.81
  11   1   4   14.50    0.87
  12  -1   4   -0.06    0.10
  12   1   4    0.15    0.10
  12   1   4    0.08    0.08
  13  -1   4    4.23    0.32
  13   1   4    3.97    0.27
  13   1   4    4.34    0.30
  14  -1   4    2.99    0.20
  14   1   4    2.43    0.19
  14   1   4    2.38    0.20
  15  -2  -4    0.04    0.06
  15   2  -4   -0.04    0.05
  14  -2  -4    0.33    0.11
  14   2  -4    0.31    0.11
  13   2  -4    0.12    0.09
  13   2  -4    0.19    0.08
  12   2  -4    8.54    0.57
  12   2  -4    9.25    0.55
  11  -2  -4   16.05    1.10
  11   2  -4   14.83    1.13
  11   2  -4   15.84    1.01
  11   2  -4   17.91    0.83
  11   2  -4   18.67    0.96
  10  -2  -4   18.75    1.04
  10   2  -4   19.06    1.25
  10   2  -4   20.41    1.07
  10   2  -4   18.62    1.14
   9   2  -4    0.10    0.09
   9   2  -4    0.15    0.07
   9   2  -4    0.10    0.05
   9   2  -4    0.15    0.15
   8   2  -4   57.96    3.20
   8   2  -4   55.79    2.64
   8   2  -4   55.79    2.76
   8   2  -4   50.99    3.22
   8   2  -4   58.61    3.19
   8   2  -4   57.61    3.01
   8   2  -4   57.43    3.11
   8   2  -4   58.42    3.29
   7  -2  -4    1.86    0.23
   7  -2  -4    2.34    0.28
   7   2  -4    2.23    0.27
   7   2  -4    2.44    0.24
   7   2  -4    2.20    0.22
   7   2  -4    2.26    0.24
   6  -2  -4   12.16    0.81
   6  -2  -4   10.54    0.98
   6  -2  -4   13.26    0.85
  -6   2   4   12.25    0.81
  -6   2   4   12.86    0.86
   6   2  -4   13.39    0.77
   6   2  -4   13.76    0.81
   6   2  -4   14.13    0.82
  -6   2   4   10.87    0.95
   6   2  -4   14.38    0.81
   5  -2  -4    7.71    0.65
   5  -2  -4    7.68    0.52
   5  -2  -4    7.35    0.66
  -5  -2   4    7.06    0.56
   5  -2  -4    8.04    0.54
  -5   2   4    8.59    0.68
   5   2  -4    8.06    0.51
   5   2  -4    6.18    0.47
   5   2  -4    8.33    0.50
   5   2  -4    7.86    0.51
  -5   2   4    8.54    0.53
  -5   2   4    6.98    0.63
  -5   2   4    7.99    0.55
   5   2  -4    7.27    0.57
   5   2  -4    8.38    0.48
   5   2  -4    7.01    0.49
   5   2  -4    7.68    0.56
   4  -2  -4    8.97    0.57
   4  -2  -4    8.86    0.70
   4  -2  -4    9.39    0.69
   4  -2  -4    9.20    0.59
  -4  -2   4    9.50    0.62
   4   2  -4    9.81    0.57
  -4   2   4    8.78    0.67
   4   2  -4    7.56    0.53
   4   2  -4    7.99    0.55
  -4   2   4    9.39    0.60
   4   2  -4    9.57    0.56
   4   2  -4    8.80    0.61
   4   2  -4    9.37    0.53
  -4   2   4    9.79    0.58
   4   2  -4    9.01    0.60
   4   2  -4    8.35    0.53
  -4   2   4    9.87    0.71
  -4   2   4    9.75    0.57
   4   2  -4    8.99    0.56
  -3  -2   4  198.59   10.78
   3  -2  -4  205.23   10.87
   3  -2  -4  208.25   10.86
   3  -2  -4  187.23   11.07
  -3  -2   4  199.18   10.78
   3  -2  -4  188.66   10.43
  -3   2   4  199.39   11.10
   3   2  -4  198.81   10.61
   3   2  -4  185.91   11.08
  -3   2   4  204.26   10.44
   3   2  -4  171.80   10.42
   3   2  -4  196.00   10.78
   3   2  -4  197.54   10.50
   3   2  -4  201.80   11.14
   3   2  -4  197.24   10.52
  -3   2   4  211.02   10.87
  -3   2   4  200.19   11.09
   3   2  -4  189.40   10.78
   3   2  -4  175.35   10.99
  -3   2   4  201.83   10.86
   2  -2  -4  162.04    8.32
  -2  -2   4  158.66    8.25
   2  -2  -4  131.43    8.47
   2  -2  -4  142.85    7.99
  -2  -2   4  156.57    8.25
   2  -2  -4  158.95    8.31
   2   2  -4  152.75    8.06
   2   2  -4  132.68    8.49
  -2   2   4  155.45    8.05
   2   2  -4  148.94    8.12
   2   2  -4  144.10    7.96
   2   2  -4  137.27    8.42
  -2   2   4  159.64    8.31
   2   2  -4  149.12    8.52
   2   2  -4  148.20    8.25
   2   2  -4  150.13    8.25
   2   2  -4  152.13    8.06
  -2   2   4  163.88    8.32
  -2   2   4  143.24    8.53
  -2   2   4  150.99    8.44
   1  -2  -4  109.51    5.99
  -1  -2   4  119.59    5.95
   1  -2  -4   97.84    6.10
  -1  -2   4  112.05    5.95
   1  -2  -4  118.23    5.99
   1   2  -4  101.30    5.76
   1   2  -4  102.65    6.08
   1   2  -4   98.81    5.70
   1   2  -4  109.95    5.94
  -1   2   4   95.74    5.75
  -1   2   4  110.15    5.98
  -1   2   4  108.07    6.11
   1   2  -4  106.30    5.81
  -1   2   4  100.34    6.10
   1   2  -4  107.95    6.16
  -1   2   4  110.78    6.09
  -1   2   4  112.99    5.79
   1   2  -4  112.41    5.82
   1   2  -4  117.00    5.95
  -1   2   4  116.75    5.99
  -1   2   4  102.52    5.71
   1   2  -4  103.62    6.12
   0  -2   4   24.16    1.29
   0  -2  -4   24.78    1.29
   0  -2   4   24.59    1.30
   0  -2  -4   23.16    1.29
   0   2   4   23.67    1.28
   0   2   4   20.94    1.23
   0   2   4   22.64    1.21
   0   2  -4   22.05    1.30
   0   2  -4   20.16    1.28
   0   2   4   20.85    1.21
   0   2  -4   19.27    1.19
   0   2  -4   22.27    1.24
   0   2   4   22.24    1.28
   0   2  -4   23.31    1.29
   0   2  -4   22.22    1.21
   0   2   4   21.86    1.22
   0   2   4   20.47    1.28
   0   2  -4   21.94    1.21
   0   2  -4   21.97    1.29
   0   2  -4   24.53    1.29
   0   2   4   22.75    1.30
   0   2   4   23.03    1.29
   1  -2   4  330.98   17.34
   1  -2   4  330.18   17.38
  -1  -2  -4  351.74   17.43
   1  -2   4  296.23   17.87
  -1  -2  -4  334.22   17.40
   1   2   4  291.15   17.87
   1   2   4  326.48   16.85
   1   2   4  308.90   16.83
   1   2   4  307.93   17.89
   1   2   4  295.79   16.97
   1   2   4  329.16   17.40
  -1   2  -4  311.46   17.38
   1   2   4  318.82   17.37
  -1   2  -4  306.28   17.99
  -1   2  -4  328.26   18.00
  -1   2  -4  310.29   16.98
   1   2   4  309.00   16.79
   1   2   4  292.08   17.17
   2  -2   4    5.64    0.44
   2  -2   4    5.63    0.45
  -2  -2  -4    6.13    0.39
   2  -2   4    4.68    0.36
   2  -2   4    5.38    0.38
  -2  -2  -4    6.20    0.38
   2   2   4    5.48    0.33
  -2   2  -4    5.75    0.43
  -2   2  -4    5.48    0.38
  -2   2  -4    5.63    0.44
  -2   2  -4    5.30    0.38
   2   2   4    5.44    0.34
   2   2   4    6.17    0.38
   2   2   4    5.73    0.37
   2   2   4    5.57    0.35
   2   2   4    6.29    0.39
  -2   2  -4    5.66    0.37
   2   2   4    6.09    0.33
   2   2   4    6.19    0.36
   2   2   4    5.96    0.35
   3  -2   4    8.29    0.55
  -3  -2  -4    8.80    0.55
  -3  -2  -4    9.37    0.57
   3  -2   4    8.19    0.62
   3  -2   4    7.85    0.63
   3  -2   4    7.86    0.52
   3  -2   4    7.62    0.49
   3   2   4    7.78    0.51
   3   2   4    8.78    0.52
   3   2   4    7.80    0.49
  -3   2  -4    7.99    0.60
   3   2   4    8.58    0.49
   3   2   4    9.00    0.56
  -3   2  -4    9.00    0.53
   3   2   4    8.59    0.55
   3   2   4    9.94    0.55
  -3   2  -4    8.15    0.54
   3   2   4    8.00    0.49
   3   2   4    9.22    0.51
  -3   2  -4    8.66    0.63
  -3   2  -4    8.85    0.55
  -4  -2  -4    0.95    0.16
   4  -2   4    0.72    0.20
  -4  -2  -4    1.01    0.16
   4  -2   4    0.78    0.21
   4  -2   4    0.80    0.10
   4  -2   4    0.88    0.14
   4  -2   4    0.83    0.14
   4   2   4    0.88    0.11
   4   2   4    0.96    0.14
   4   2   4    1.01    0.16
  -4   2  -4    1.09    0.16
  -4   2  -4    0.93    0.15
  -4   2  -4    1.02    0.21
   4   2   4    0.77    0.11
   4   2   4    1.19    0.12
  -4   2  -4    0.87    0.21
   4   2   4    0.81    0.15
   4   2   4    0.77    0.10
  -4   2  -4    0.85    0.13
   4   2   4    0.96    0.11
   5  -2   4    2.64    0.27
   5  -2   4    2.31    0.38
   5  -2   4    2.59    0.21
   5  -2   4    3.12    0.42
   5  -2   4    2.99    0.28
   5   2   4    2.56    0.30
   5   2   4    2.71    0.23
  -5   2  -4    2.86    0.39
  -5   2  -4    2.90    0.27
   5   2   4    3.02    0.23
   5   2   4    2.90    0.23
  -5   2  -4    2.95    0.23
  -5   2  -4    2.77    0.36
  -5   2  -4    3.12    0.28
   5   2   4    2.20    0.28
   5   2   4    3.06    0.26
   6  -2   4    0.52    0.15
   6  -2   4    0.48    0.14
  -6   2  -4    0.42    0.13
   6   2   4    0.61    0.12
  -6   2  -4    0.52    0.14
   6   2   4    0.61    0.12
   6   2   4    0.77    0.12
   6   2   4    0.64    0.16
   7   2   4    4.23    0.35
   7   2   4    3.97    0.34
   7   2   4    4.33    0.33
   8  -2   4    0.21    0.06
   8   2   4    0.29    0.14
   8   2   4    0.12    0.12
   8   2   4    0.22    0.10
   8   2   4    0.14    0.07
   8   2   4    0.12    0.12
   9   2   4    1.65    0.13
   9   2   4    1.62    0.18
   9   2   4    1.11    0.21
   9   2   4    1.22    0.12
   9   2   4    1.21    0.23
   9   2   4    1.13    0.13
   9   2   4    1.51    0.25
   9   2   4    1.22    0.12
   9   2   4    1.24    0.15
  10   2   4    3.79    0.28
  10   2   4    3.64    0.22
  10   2   4    4.06    0.31
  11  -2   4    0.27    0.08
  11   2   4    0.27    0.13
  11   2   4    0.23    0.11
  12   2   4    0.22    0.10
  12   2   4    0.10    0.10
  13   2   4    1.11    0.15
  13   2   4    0.88    0.12
  14  -2   4    0.35    0.07
  14   2   4    0.24    0.10
  14   3  -4    0.23    0.08
  14   3  -4    0.37    0.09
  13   3  -4    5.73    0.41
  13   3  -4    7.18    0.42
  12   3  -4   17.65    0.97
  12   3  -4   16.59    1.03
  12   3  -4   17.20    0.83
  11   3  -4   13.81    0.78
  11   3  -4   13.11    0.83
  10   3  -4    1.81    0.21
  10   3  -4    1.32    0.27
  10   3  -4    1.97    0.21
   9   3  -4    0.82    0.20
   9   3  -4    0.59    0.12
   9   3  -4    0.62    0.09
   9   3  -4    0.81    0.12
   9   3  -4    0.84    0.19
   8   3  -4   21.76    1.03
   8   3  -4   20.48    1.27
   8   3  -4   22.63    1.13
   8   3  -4   21.13    1.33
   8   3  -4   21.49    1.19
   8   3  -4   22.11    1.31
  -7   3   4    0.32    0.15
   7   3  -4    0.50    0.09
   7   3  -4    0.22    0.05
   7   3  -4    0.36    0.05
   7   3  -4    0.40    0.13
   7   3  -4    0.16    0.08
   7   3  -4    0.12    0.13
   7   3  -4    0.43    0.08
   7   3  -4    0.34    0.09
   6   3  -4    8.70    0.59
  -6   3   4    8.70    0.63
   6   3  -4    8.75    0.60
   6   3  -4    8.87    0.55
   6   3  -4    8.82    0.53
  -6   3   4    8.39    0.60
  -5  -3   4  100.44    6.46
   5  -3  -4  106.04    6.63
  -5   3   4  124.31    6.60
   5   3  -4  104.04    6.46
   5   3  -4  116.86    6.58
  -5   3   4  126.76    6.29
   5   3  -4  127.06    6.38
   5   3  -4  121.96    6.33
  -5   3   4  126.68    6.67
  -5   3   4  114.13    6.64
   5   3  -4  109.17    6.21
   5   3  -4  122.14    6.21
   5   3  -4  111.09    6.58
   4  -3  -4   22.10    1.44
  -4  -3   4   22.25    1.31
   4  -3  -4   23.24    1.47
  -4  -3   4   21.37    1.30
   4   3  -4   20.28    1.30
   4   3  -4   23.14    1.22
   4   3  -4   21.57    1.30
   4   3  -4   23.00    1.29
   4   3  -4   23.33    1.30
  -4   3   4   22.51    1.46
  -4   3   4   24.22    1.35
  -4   3   4   21.84    1.43
   4   3  -4   21.29    1.31
  -4   3   4   23.82    1.29
   4   3  -4   23.35    1.30
   4   3  -4   22.23    1.29
  -4   3   4   23.55    1.36
   4   3  -4   20.27    1.22
   3  -3  -4   61.67    3.64
  -3  -3   4   62.25    3.49
   3  -3  -4   65.82    3.64
   3   3  -4   63.48    3.50
   3   3  -4   65.68    3.48
   3   3  -4   62.50    3.57
   3   3  -4   59.61    3.36
  -3   3   4   68.13    3.62
   3   3  -4   59.89    3.50
  -3   3   4   59.94    3.61
   3   3  -4   58.51    3.59
  -3   3   4   66.27    3.43
   3   3  -4   63.20    3.57
  -3   3   4   66.08    3.64
   3   3  -4   63.51    3.36
  -3   3   4   64.17    3.63
   3   3  -4   62.15    3.45
   2  -3  -4   83.22    4.73
   2  -3  -4   89.10    4.73
  -2  -3   4   87.61    4.63
  -2  -3   4   88.02    4.63
   2   3  -4   85.01    4.45
  -2   3   4   71.08    4.53
   2   3  -4   86.83    4.63
  -2   3   4   82.41    4.49
   2   3  -4   86.97    4.63
   2   3  -4   87.92    4.59
  -2   3   4   85.56    4.73
   2   3  -4   81.87    4.76
  -2   3   4   89.74    4.78
   2   3  -4   78.66    4.75
  -2   3   4   81.18    4.72
  -2   3   4   74.64    4.77
  -2   3   4   89.12    4.79
   2   3  -4   86.31    4.50
   2   3  -4   87.02    4.56
  -2   3   4   84.94    4.51
   2   3  -4   84.29    4.48
   2   3  -4   88.80    4.78
  -2   3   4   71.60    4.50
  -1  -3   4   37.07    1.92
   1  -3  -4   34.36    1.97
  -1  -3   4   35.54    1.92
   1  -3  -4   33.80    1.96
   1   3  -4   35.83    1.90
  -1   3   4   32.76    1.96
   1   3  -4   35.73    1.98
  -1   3   4   30.72    1.86
  -1   3   4   33.60    1.97
   1   3  -4   35.17    1.94
  -1   3   4   32.57    1.86
  -1   3   4   35.49    1.98
  -1   3   4   32.85    1.96
   1   3  -4   34.76    1.91
  -1   3   4   31.08    1.85
   1   3  -4   34.31    1.94
   1   3  -4   35.84    1.92
   1   3  -4   33.77    1.83
   1   3  -4   35.72    1.83
  -1   3   4   33.52    1.85
   1   3  -4   31.91    1.82
  -1   3   4   33.66    1.96
   0  -3  -4    2.29    0.19
   0  -3   4    2.30    0.20
   0  -3  -4    2.23    0.21
   0  -3   4    2.26    0.20
   0   3  -4    2.26    0.21
   0   3   4    2.15    0.17
   0   3  -4    2.20    0.20
   0   3   4    2.15    0.16
   0   3   4    2.24    0.19
   0   3   4    2.18    0.17
   0   3   4    2.61    0.19
   0   3  -4    2.18    0.21
   0   3   4    2.36    0.20
   0   3  -4    2.26    0.19
   0   3  -4    2.27    0.15
   0   3   4    1.99    0.15
   0   3  -4    2.18    0.16
   0   3  -4    1.91    0.15
   0   3   4    2.19    0.20
   0   3  -4    2.28    0.16
   0   3   4    2.27    0.15
   0   3  -4    2.20    0.16
   1  -3   4    4.86    0.37
  -1  -3  -4    4.66    0.31
   1  -3   4    4.79    0.37
  -1  -3  -4    4.77    0.31
  -1   3  -4    4.55    0.36
  -1   3  -4    4.70    0.31
  -1   3  -4    4.17    0.29
  -1   3  -4    4.54    0.33
   1   3   4    4.43    0.30
  -1   3  -4    5.02    0.36
   1   3   4    4.84    0.33
   1   3   4    4.28    0.28
   1   3   4    4.72    0.28
   1   3   4    4.69    0.31
   1   3   4    4.66    0.31
  -1   3  -4    4.72    0.30
   1   3   4    4.97    0.29
   1   3   4    4.76    0.31
   1   3   4    4.75    0.27
   1   3   4    4.55    0.27
  -1   3  -4    4.02    0.29
  -1   3  -4    4.05    0.30
   2  -3   4   18.66    1.24
   2  -3   4   18.99    1.23
  -2  -3  -4   19.72    1.14
   2  -3   4   17.45    1.18
  -2  -3  -4   20.04    1.13
   2   3   4   20.00    1.07
  -2   3  -4   19.41    1.23
  -2   3  -4   20.38    1.19
   2   3   4   19.91    1.13
   2   3   4   20.48    1.11
   2   3   4   20.69    1.07
   2   3   4   18.79    1.10
   2   3   4   20.86    1.18
  -2   3  -4   21.15    1.18
   2   3   4   20.99    1.14
  -2   3  -4   19.94    1.12
   2   3   4   19.44    1.14
   2   3   4   20.04    1.14
   2   3   4   19.58    1.13
   3  -3   4    0.77    0.21
   3  -3   4    0.93    0.19
  -3  -3  -4    1.22    0.13
  -3  -3  -4    1.11    0.14
   3   3   4    1.33    0.10
   3   3   4    1.21    0.16
   3   3   4    1.24    0.10
   3   3   4    1.26    0.13
   3   3   4    1.33    0.14
  -3   3  -4    1.10    0.15
  -3   3  -4    1.07    0.14
  -3   3  -4    1.05    0.20
   3   3   4    1.17    0.10
   3   3   4    1.09    0.13
   3   3   4    1.30    0.15
  -3   3  -4    0.80    0.18
   3   3   4    1.39    0.10
  -3   3  -4    1.15    0.15
   4  -3   4  163.00    9.56
  -4  -3  -4  161.87    9.40
   4   3   4  157.47    9.62
   4   3   4  193.46    9.05
   4   3   4  173.59    9.28
   4   3   4  164.91    9.06
  -4   3  -4  171.61    9.55
  -4   3  -4  186.88    9.14
   4   3   4  162.99    9.16
   4   3   4  166.64    9.40
  -4   3  -4  182.39    9.63
   4   3   4  163.23    9.06
   4   3   4  157.45    9.40
  -4   3  -4  167.54    9.52
   4   3   4  164.89    9.62
  -4   3  -4  188.51    9.69
   5  -3   4   16.27    1.36
  -5   3  -4   21.26    1.23
   5   3   4   21.26    1.12
   5   3   4   20.83    1.21
  -5   3  -4   21.77    1.26
   5   3   4   22.97    1.19
  -5   3  -4   20.25    1.19
   5   3   4   18.98    1.19
  -5   3  -4   17.45    1.35
   5   3   4   19.21    1.15
   5   3   4   18.54    1.12
   6   3   4   76.55    4.51
  -6   3  -4   77.99    4.72
  -6   3  -4   88.43    4.54
  -6   3  -4   82.39    4.79
   6   3   4   84.25    4.45
   6   3   4   86.43    4.72
   7   3   4   39.30    2.03
   7   3   4   37.13    2.24
   7   3   4   42.25    2.32
   7   3   4   38.10    2.21
   7   3   4   38.83    2.28
   7   3   4   42.21    2.19
   7   3   4   39.14    1.94
   7   3   4   40.17    1.86
   8   3   4   19.28    0.94
   8   3   4   17.88    1.08
   8   3   4   21.07    1.16
   8   3   4   20.01    0.98
   8   3   4   20.52    1.18
   8   3   4   19.81    1.26
   8   3   4   20.66    1.04
   9   3   4    8.05    0.44
   9   3   4    7.76    0.48
   9   3   4    8.47    0.53
   9   3   4    7.37    0.57
  10   3   4    7.95    0.50
  10   3   4    8.86    0.56
  11   3   4    2.50    0.23
  11   3   4    2.21    0.19
  12   3   4    0.30    0.08
  12   3   4    0.33    0.13
  13   3   4    0.98    0.13
  14   3   4   -0.03    0.06
  14   4  -4    0.11    0.07
  14   4  -4    0.03    0.07
  13   4  -4    2.71    0.22
  13   4  -4    3.31    0.24
  12   4  -4    1.36    0.16
  12   4  -4    1.14    0.17
  11   4  -4    1.11    0.17
  11   4  -4    1.28    0.17
  10   4  -4    6.34    0.43
  10   4  -4    6.61    0.45
   9   4  -4    1.30    0.25
   9   4  -4    1.46    0.16
   9   4  -4    1.76    0.13
   9   4  -4    1.70    0.20
   8   4  -4    7.87    0.54
   8   4  -4    8.51    0.48
   8   4  -4    7.67    0.51
   8   4  -4    8.31    0.51
   8   4  -4    9.56    0.52
   8   4  -4    8.69    0.42
   8   4  -4    8.67    0.65
   7   4  -4   43.51    2.38
   7   4  -4   41.57    2.52
  -7   4   4   43.89    2.54
   7   4  -4   44.31    2.37
   7   4  -4   45.09    2.55
  -7   4   4   44.57    2.34
  -7   4   4   47.03    2.69
   7   4  -4   44.81    2.07
   7   4  -4   45.96    2.27
   7   4  -4   42.60    2.38
   7   4  -4   43.75    2.54
   7   4  -4   45.30    2.52
   6   4  -4   65.41    3.49
   6   4  -4   64.21    3.54
  -6   4   4   63.17    3.69
   6   4  -4   62.02    3.51
  -6   4   4   60.36    3.63
  -6   4   4   61.88    3.49
  -5   4   4    2.61    0.26
  -5   4   4    2.73    0.28
   5   4  -4    2.65    0.26
  -5   4   4    2.53    0.28
   5   4  -4    2.28    0.27
  -4   4   4   35.95    2.08
   4   4  -4   32.11    2.04
   4   4  -4   36.55    2.01
   4   4  -4   37.60    2.00
  -4   4   4   36.08    1.98
  -4   4   4   34.59    2.08
  -4   4   4   33.67    1.97
  -3   4   4   40.39    2.36
  -3   4   4   38.45    2.41
  -3   4   4   43.31    2.37
  -3   4   4   40.71    2.23
   3   4  -4   40.74    2.26
  -3   4   4   41.31    2.23
   3   4  -4   40.54    2.26
   3   4  -4   39.58    2.17
   3   4  -4   38.02    2.34
   2  -4  -4    8.33    0.65
   2  -4  -4    7.73    0.63
   2   4  -4    9.94    0.59
  -2   4   4    8.74    0.64
  -2   4   4    9.82    0.62
  -2   4   4    7.65    0.55
   2   4  -4    9.64    0.53
  -2   4   4    8.29    0.64
  -2   4   4    9.54    0.56
  -2   4   4    9.20    0.58
   2   4  -4    9.76    0.57
   2   4  -4    9.55    0.61
  -2   4   4    8.55    0.57
  -1  -4   4   11.44    0.69
   1  -4  -4   11.98    0.77
   1  -4  -4   11.12    0.77
  -1  -4   4   11.95    0.70
   1   4  -4   10.96    0.67
   1   4  -4   11.83    0.65
   1   4  -4   12.75    0.69
   1   4  -4   11.79    0.70
  -1   4   4   11.76    0.76
  -1   4   4   13.02    0.73
  -1   4   4   12.55    0.69
   1   4  -4   12.62    0.77
   1   4  -4   11.42    0.69
  -1   4   4   12.06    0.72
  -1   4   4   11.90    0.76
  -1   4   4   11.70    0.71
   1   4  -4   11.75    0.69
  -1   4   4   10.51    0.67
   1   4  -4   13.00    0.74
  -1   4   4   13.25    0.78
  -1   4   4   11.41    0.68
   1   4  -4   12.48    0.65
   0  -4   4    0.31    0.09
   0  -4  -4    0.47    0.10
   0  -4  -4    0.37    0.10
   0   4  -4    0.43    0.07
   0   4  -4    0.44    0.12
   0   4   4    0.44    0.06
   0   4  -4    0.25    0.10
   0   4  -4    0.41    0.09
   0   4  -4    0.40    0.07
   0   4  -4    0.34    0.06
   0   4   4    0.55    0.13
   0   4  -4    0.46    0.07
   0   4  -4    0.46    0.06
   0   4   4    0.50    0.09
   0   4   4    0.52    0.07
   0   4   4    0.70    0.10
   0   4   4    0.48    0.08
   0   4   4    0.47    0.09
   0   4   4    0.39    0.06
   0   4   4    0.51    0.07
   0   4  -4    0.34    0.09
   1  -4   4   10.77    0.71
  -1  -4  -4    9.86    0.60
  -1  -4  -4   10.37    0.60
  -1   4  -4   10.97    0.70
  -1   4  -4   10.08    0.68
  -1   4  -4    9.93    0.61
   1   4   4   10.38    0.60
   1   4   4   10.89    0.63
   1   4   4   10.58    0.60
  -1   4  -4    9.87    0.69
   1   4   4   10.54    0.60
   1   4   4   10.82    0.57
   1   4   4   10.35    0.63
  -1   4  -4   10.06    0.61
  -1   4  -4   10.37    0.64
   1   4   4   11.11    0.68
  -1   4  -4   10.52    0.61
  -1   4  -4    9.86    0.64
   1   4   4   10.47    0.62
   1   4   4   10.47    0.60
   1   4   4   11.08    0.57
   2  -4   4   13.14    0.97
   2  -4   4   14.57    0.99
   2   4   4   14.68    0.88
  -2   4  -4   16.15    0.95
  -2   4  -4   13.60    0.95
   2   4   4   15.48    0.92
  -2   4  -4   15.68    0.91
   2   4   4   13.69    0.85
  -2   4  -4   15.86    0.87
   2   4   4   15.42    0.86
  -2   4  -4   14.51    0.98
  -2   4  -4   14.64    0.86
  -3   4  -4    2.73    0.25
   3   4   4    3.37    0.25
  -3   4  -4    2.86    0.24
   3   4   4    2.43    0.21
  -3   4  -4    2.94    0.33
  -3   4  -4    2.80    0.28
   3   4   4    2.76    0.26
  -4   4  -4   12.75    0.77
   4   4   4   10.08    0.70
  -4   4  -4   11.91    0.74
   4   4   4   11.35    0.74
   4   4   4   12.50    0.72
  -4   4  -4   11.80    0.78
  -5   4  -4   12.82    0.81
  -5   4  -4   12.36    0.82
   5   4   4   11.49    0.76
  -5   4  -4   12.77    0.84
   5   4   4   13.68    0.83
   6   4   4    0.23    0.05
   6   4   4    0.15    0.05
  -6   4  -4    0.15    0.12
   6   4   4    0.16    0.07
   6   4   4    0.30    0.07
   6   4   4    0.15    0.04
  -6   4  -4    0.14    0.13
   6   4   4    0.03    0.08
   6   4   4    0.25    0.05
  -6   4  -4    0.03    0.09
  -7   4  -4   10.55    0.60
   7   4   4   11.06    0.67
   7   4   4   10.56    0.53
   7   4   4   10.76    0.61
   7   4   4   11.18    0.52
   7   4   4   12.19    0.71
   7   4   4   10.99    0.59
  -7   4  -4   11.10    0.76
  -7   4  -4   11.34    0.81
   7   4   4   10.61    0.65
   7   4   4    9.28    0.61
   8   4   4    2.74    0.19
   8   4   4    2.59    0.21
   8   4   4    2.86    0.15
   8   4   4    2.90    0.17
   8   4   4    3.09    0.23
   8   4   4    2.51    0.20
   8   4   4    3.10    0.21
   9   4   4    0.05    0.06
   9   4   4    0.09    0.08
   9   4   4    0.23    0.08
   9   4   4    0.14    0.06
  10   4   4    6.31    0.41
  10   4   4    7.36    0.48
  10   4   4    6.81    0.39
  11   4   4    2.09    0.20
  11   4   4    2.29    0.25
  12   4   4    0.68    0.15
  13   4   4    3.04    0.23
  14   4   4    0.01    0.05
  13   5  -4    0.50    0.09
  13   5  -4    0.45    0.09
  12   5  -4    2.45    0.23
  12   5  -4    2.37    0.22
  11   5  -4    0.34    0.13
  11   5  -4    0.21    0.09
  10   5  -4    6.88    0.47
  10   5  -4    7.21    0.44
  -9   5   4   -0.03    0.18
   9   5  -4   -0.02    0.10
   9   5  -4    0.00    0.11
   9   5  -4    0.12    0.14
  -9   5   4    0.07    0.07
   9   5  -4    0.10    0.15
   8   5  -4   10.86    0.54
  -8   5   4   11.80    0.64
   8   5  -4   11.23    0.65
  -8   5   4   12.33    0.86
   8   5  -4   11.20    0.70
  -8   5   4    9.81    0.79
  -8   5   4   10.60    0.60
   8   5  -4   12.25    0.62
  -7   5   4    0.44    0.17
   7   5  -4    0.17    0.09
   7   5  -4    0.23    0.10
   7   5  -4    0.19    0.08
   7   5  -4    0.78    0.20
   7   5  -4    0.20    0.12
   7   5  -4    0.11    0.04
  -7   5   4    0.22    0.08
  -7   5   4    0.04    0.16
   7   5  -4    0.13    0.07
   6   5  -4    4.29    0.30
   6   5  -4    3.59    0.25
  -6   5   4    4.05    0.24
  -6   5   4    4.05    0.38
   6   5  -4    3.94    0.20
   6   5  -4    4.70    0.41
   6   5  -4    4.21    0.27
   6   5  -4    4.01    0.39
  -6   5   4    4.39    0.40
  -6   5   4    4.16    0.26
   6   5  -4    4.13    0.29
   6   5  -4    4.53    0.26
   5   5  -4    9.97    0.58
   5   5  -4    9.34    0.68
   5   5  -4   10.00    0.67
   5   5  -4    9.62    0.53
   5   5  -4    9.37    0.60
  -5   5   4   10.12    0.70
  -5   5   4   10.70    0.70
  -5   5   4   10.33    0.68
  -5   5   4   10.06    0.55
   5   5  -4    9.14    0.57
  -5   5   4   11.33    0.72
  -4   5   4    3.89    0.36
   4   5  -4    3.89    0.35
  -4   5   4    4.02    0.34
  -4   5   4    3.61    0.35
  -4   5   4    4.24    0.34
   4   5  -4    3.91    0.34
   4   5  -4    3.32    0.31
  -3   5   4   93.44    5.27
   3   5  -4   89.99    4.90
   3   5  -4   93.36    5.05
   3   5  -4   91.42    5.06
   3   5  -4   87.56    5.26
  -3   5   4   89.67    4.97
  -3   5   4   97.95    5.29
  -3   5   4   92.91    4.98
   2   5  -4   42.69    2.33
  -2   5   4   43.18    2.44
  -2   5   4   39.00    2.28
  -2   5   4   43.08    2.27
   2   5  -4   39.84    2.23
   2   5  -4   39.73    2.43
  -2   5   4   41.49    2.39
   1   5  -4    1.74    0.21
   1   5  -4    1.76    0.21
  -1   5   4    1.64    0.15
  -1   5   4    1.82    0.15
  -1   5   4    1.67    0.20
   1   5  -4    1.52    0.15
  -1   5   4    1.70    0.23
  -1   5   4    1.51    0.15
  -1   5   4    1.35    0.14
   0  -5  -4   55.97    3.51
   0  -5   4   59.03    3.54
   0   5  -4   69.67    3.59
   0   5   4   57.52    3.46
   0   5   4   65.98    3.38
   0   5  -4   62.33    3.38
   0   5   4   64.87    3.58
   0   5   4   63.93    3.43
   0   5  -4   67.45    3.68
   0   5  -4   57.72    3.52
   0   5  -4   60.76    3.39
   0   5  -4   60.26    3.59
   0   5   4   64.18    3.58
   0   5   4   58.35    3.51
   0   5  -4   67.84    3.39
   0   5   4   66.38    3.67
   0   5   4   67.82    3.38
   0   5  -4   69.50    3.51
  -1   5  -4    0.07    0.06
  -1   5  -4    0.10    0.05
   1   5   4    0.06    0.06
  -1   5  -4    0.04    0.05
   1   5   4    0.16    0.07
  -1   5  -4    0.01    0.06
  -1   5  -4    0.10    0.06
   1   5   4    0.09    0.10
  -1   5  -4    0.10    0.11
  -2   5  -4    2.87    0.25
  -2   5  -4    3.47    0.26
   2   5   4    3.22    0.29
   2   5   4    3.21    0.26
   2   5   4    3.16    0.27
  -2   5  -4    3.49    0.26
  -2   5  -4    3.26    0.30
   2   5   4    2.73    0.24
   3   5   4    6.47    0.42
  -3   5  -4    6.42    0.44
  -3   5  -4    5.97    0.43
   3   5   4    5.06    0.39
  -3   5  -4    5.77    0.47
  -3   5  -4    6.85    0.44
   3   5   4    6.03    0.45
  -4   5  -4    4.56    0.39
  -4   5  -4    4.75    0.38
  -4   5  -4    5.04    0.40
   4   5   4    5.34    0.38
  -5   5  -4   90.86    4.84
  -5   5  -4   96.56    5.18
   5   5   4  111.04    6.06
   5   5   4   94.75    4.60
   5   5   4   91.66    5.62
   5   5   4  103.61    5.03
   5   5   4   97.15    5.47
   5   5   4   96.37    5.50
  -5   5  -4  103.65    5.42
  -5   5  -4  104.61    5.74
   5   5   4  102.82    5.51
  -6   5  -4   22.15    1.37
   6   5   4   22.31    1.33
  -6   5  -4   21.13    1.08
   6   5   4   25.97    1.42
   6   5   4   22.70    1.06
   6   5   4   19.71    1.23
  -6   5  -4   20.67    1.13
   6   5   4   25.15    1.18
  -6   5  -4   23.06    1.45
   6   5   4   22.04    1.28
   6   5   4   24.29    1.41
  -7   5  -4    2.37    0.33
   7   5   4    2.73    0.18
   7   5   4    2.64    0.22
   7   5   4    2.62    0.14
   7   5   4    2.57    0.23
   7   5   4    2.37    0.20
   8   5   4    3.92    0.29
   8   5   4    3.12    0.24
  -8   5  -4    3.75    0.28
   8   5   4    3.58    0.19
   8   5   4    4.08    0.24
  -9   5  -4    0.07    0.07
   9   5   4    0.07    0.05
   9   5   4    0.02    0.12
   9   5   4    0.11    0.09
  10   5   4    0.04    0.09
  10   5   4    0.07    0.09
  11   5   4   12.03    0.76
  12   5   4    0.95    0.13
  12   5   4    0.78    0.05
  13   5   4    0.12    0.08
 -13   6   4    0.07    0.06
  13   6  -4    0.12    0.06
  13   6  -4    0.20    0.07
  12   6  -4    0.25    0.09
  12   6  -4    0.44    0.12
  11   6  -4    0.87    0.15
  11   6  -4    0.41    0.13
  10   6  -4    6.20    0.43
  10   6  -4    5.69    0.40
   9   6  -4    0.16    0.12
   9   6  -4    0.07    0.08
   8   6  -4    5.83    0.42
   8   6  -4    5.26    0.53
   8   6  -4    6.64    0.37
  -8   6   4    6.10    0.59
   8   6  -4    6.57    0.41
  -7   6   4   25.05    1.70
   7   6  -4   26.53    1.58
  -7   6   4   30.67    1.68
   7   6  -4   27.37    1.48
  -7   6   4   27.17    1.67
   7   6  -4   24.94    1.44
   7   6  -4   25.77    1.64
   7   6  -4   25.71    1.66
   7   6  -4   29.31    1.54
   7   6  -4   28.12    1.41
   6   6  -4    2.51    0.20
   6   6  -4    2.81    0.20
  -6   6   4    2.30    0.21
   6   6  -4    2.51    0.30
   6   6  -4    2.48    0.21
   6   6  -4    2.85    0.24
   6   6  -4    2.60    0.20
  -6   6   4    2.60    0.35
  -5   6   4    1.27    0.22
   5   6  -4    0.93    0.22
  -5   6   4    1.29    0.13
  -5   6   4    1.16    0.15
   5   6  -4    1.16    0.14
   5   6  -4    1.05    0.11
  -5   6   4    1.19    0.24
  -5   6   4    1.32    0.12
   5   6  -4    1.01    0.14
   5   6  -4    1.05    0.12
   5   6  -4    1.16    0.13
   4   6  -4    7.49    0.55
  -4   6   4    7.33    0.37
  -4   6   4    8.01    0.53
  -4   6   4    6.94    0.44
  -4   6   4    7.87    0.53
  -4   6   4    7.76    0.57
   4   6  -4    6.47    0.52
   4   6  -4    7.28    0.53
  -4   6   4    7.44    0.38
  -4   6   4    7.22    0.49
   4   6  -4    6.72    0.45
   4   6  -4    6.72    0.40
  -4   6   4    6.77    0.42
   4   6  -4    7.05    0.43
  -4   6   4    7.83    0.57
   4   6  -4    6.90    0.42
   3   6  -4   11.43    0.63
   3   6  -4   11.98    0.77
  -3   6   4   10.54    0.56
  -3   6   4   11.96    0.70
  -3   6   4   11.00    0.77
  -3   6   4   10.95    0.73
   3   6  -4   11.03    0.66
   3   6  -4   11.64    0.62
  -3   6   4   10.57    0.71
  -3   6   4    9.96    0.72
  -3   6   4   10.71    0.54
  -3   6   4   10.01    0.65
   3   6  -4   11.76    0.75
  -2   6   4   59.58    2.87
  -2   6   4   58.98    3.79
   2   6  -4   62.13    3.61
  -2   6   4   61.94    3.20
   2   6  -4   62.60    3.45
  -2   6   4   64.96    3.62
  -2   6   4   61.56    3.39
  -2   6   4   62.42    3.54
  -1   6   4    3.44    0.24
   1   6  -4    3.50    0.34
  -1   6   4    3.18    0.23
  -1   6   4    3.82    0.36
   1   6  -4    3.13    0.35
  -1   6   4    3.53    0.32
  -1   6   4    3.58    0.23
  -1   6   4    3.22    0.24
   0   6   4   38.30    2.16
   0   6  -4   32.14    1.95
   0   6  -4   36.09    2.16
   0   6   4   36.25    2.00
  -1   6  -4    0.10    0.06
  -1   6  -4    0.16    0.08
  -1   6  -4    0.18    0.07
  -1   6  -4    0.18    0.10
   1   6   4    0.18    0.10
   1   6   4    0.06    0.11
   2   6   4    0.01    0.11
  -2   6  -4   -0.03    0.06
   2   6   4    0.05    0.09
   2   6   4    0.10    0.07
  -2   6  -4    0.01    0.06
  -2   6  -4    0.10    0.09
  -2   6  -4    0.01    0.07
   2   6   4    0.04    0.06
   2   6   4   -0.02    0.09
  -2   6  -4    0.04    0.07
  -2   6  -4    0.04    0.04
  -2   6  -4    0.04    0.04
   3   6   4   49.42    2.89
   3   6   4   51.73    2.87
   3   6   4   50.77    2.79
  -3   6  -4   50.26    2.83
  -3   6  -4   49.85    2.40
  -3   6  -4   50.07    2.67
  -3   6  -4   48.01    2.87
  -3   6  -4   49.22    2.51
   3   6   4   52.20    2.62
  -3   6  -4   51.73    3.05
  -3   6  -4   56.08    2.84
   3   6   4   53.30    3.15
   3   6   4   53.44    2.82
  -3   6  -4   52.65    2.99
   4   6   4    1.49    0.15
   4   6   4    1.44    0.13
   4   6   4    1.25    0.15
   4   6   4    1.60    0.16
   4   6   4    1.37    0.15
  -4   6  -4    1.86    0.24
  -4   6  -4    1.78    0.22
  -4   6  -4    1.62    0.11
   4   6   4    1.87    0.20
  -4   6  -4    1.48    0.14
  -4   6  -4    1.66    0.23
  -4   6  -4    1.56    0.15
   4   6   4    1.58    0.15
  -5   6  -4   30.12    1.86
   5   6   4   29.92    1.80
   5   6   4   33.57    1.89
   5   6   4   30.34    1.71
   5   6   4   28.11    1.76
  -5   6  -4   30.18    1.88
   5   6   4   32.44    1.57
  -5   6  -4   30.64    1.44
   5   6   4   29.03    1.71
  -5   6  -4   29.00    1.73
  -5   6  -4   30.26    1.78
   6   6   4    0.37    0.09
  -6   6  -4    0.33    0.16
   6   6   4    0.34    0.11
  -6   6  -4    0.30    0.11
   6   6   4    0.41    0.08
   6   6   4    0.48    0.09
  -6   6  -4    0.38    0.18
   7   6   4   36.86    1.78
   7   6   4   34.06    2.00
  -7   6  -4   31.59    2.01
  -7   6  -4   33.48    1.95
   7   6   4   38.69    2.14
  -7   6  -4   29.91    2.11
   8   6   4    0.89    0.14
   8   6   4    0.79    0.12
  -8   6  -4    0.72    0.13
  -8   6  -4    0.50    0.22
   9   6   4   21.24    1.06
   9   6   4   20.64    1.20
  -9   6  -4   17.85    1.15
  10   6   4    3.91    0.25
  10   6   4    3.59    0.29
  11   6   4    4.73    0.34
  12   6   4    0.46    0.10
  13   6   4    3.27    0.23
  12   7  -4    2.21    0.18
  12   7  -4    2.33    0.18
 -12   7   4    2.23    0.19
  11   7  -4    2.37    0.21
  11   7  -4    2.44    0.20
 -11   7   4    1.57    0.19
  10   7  -4    0.11    0.09
  10   7  -4    0.09    0.08
 -10   7   4    0.01    0.11
   9   7  -4   10.50    0.67
   9   7  -4   11.68    0.65
  -9   7   4   10.26    0.73
   8   7  -4    1.27    0.13
  -8   7   4    1.16    0.17
   8   7  -4    1.15    0.16
   8   7  -4    1.77    0.20
   7   7  -4    3.74    0.30
   7   7  -4    4.17    0.26
  -7   7   4    3.18    0.27
  -7   7   4    3.20    0.30
   7   7  -4    3.94    0.26
  -7   7   4    2.96    0.42
   7   7  -4    3.27    0.26
   7   7  -4    3.72    0.28
   6   7  -4    0.84    0.13
  -6   7   4    0.87    0.13
   6   7  -4    1.09    0.13
  -6   7   4    0.58    0.23
   6   7  -4    0.56    0.21
  -6   7   4    1.00    0.14
   6   7  -4    1.07    0.14
   6   7  -4    1.02    0.12
   6   7  -4    1.16    0.16
  -5   7   4   32.85    1.92
   5   7  -4   33.61    1.96
  -5   7   4   34.81    2.01
   5   7  -4   31.39    1.85
   5   7  -4   34.90    1.84
  -5   7   4   34.60    1.60
   5   7  -4   33.90    1.79
   5   7  -4   34.60    1.90
  -5   7   4   34.62    2.12
   5   7  -4   34.40    1.74
   5   7  -4   32.07    2.00
   5   7  -4   33.48    2.09
   4   7  -4   27.26    1.71
  -4   7   4   27.65    1.73
   4   7  -4   25.71    1.56
   4   7  -4   26.71    1.42
  -4   7   4   28.74    1.31
   4   7  -4   28.43    1.61
   4   7  -4   27.03    1.66
  -4   7   4   26.79    1.57
  -4   7   4   28.30    1.66
   4   7  -4   28.27    1.50
   4   7  -4   28.07    1.47
   3   7  -4    1.17    0.14
   3   7  -4    1.25    0.15
   3   7  -4    1.29    0.13
   3   7  -4    1.23    0.12
   3   7  -4    1.13    0.21
  -3   7   4    1.11    0.23
  -3   7   4    1.33    0.15
   3   7  -4    1.17    0.15
   3   7  -4    1.26    0.12
  -3   7   4    1.29    0.09
   3   7  -4    1.26    0.16
  -3   7   4    1.35    0.14
   2   7  -4    5.25    0.33
  -2   7   4    5.38    0.38
   2   7  -4    4.86    0.34
  -2   7   4    5.69    0.45
   2   7  -4    4.84    0.32
   2   7  -4    4.98    0.34
   2   7  -4    5.36    0.33
   2   7  -4    4.74    0.35
  -2   7   4    5.11    0.27
  -2   7   4    5.64    0.33
  -2   7   4    5.30    0.35
  -1   7   4    9.06    0.48
   1   7  -4    7.89    0.51
  -1   7   4    8.60    0.40
   1   7  -4    8.33    0.49
   1   7  -4    7.52    0.54
  -1   7   4    8.89    0.67
   1   7  -4    8.14    0.51
  -1   7   4    7.14    0.45
  -1   7   4    8.99    0.50
   1   7  -4    7.68    0.39
   1   7  -4    8.55    0.48
  -1   7   4    8.52    0.51
  -1   7   4    8.18    0.59
  -1   7   4    8.57    0.56
   1   7  -4    8.51    0.65
   0   7  -4   19.20    1.05
   0   7   4   19.42    1.23
   0   7   4   16.97    0.97
   0   7  -4   16.63    1.16
   0   7   4   19.51    1.05
   0   7  -4   18.17    0.87
   0   7   4   17.76    1.01
   0   7   4   18.76    1.00
   0   7  -4   19.89    1.00
   0   7  -4   18.00    1.07
   0   7   4   19.37    1.08
   0   7  -4   19.71    1.03
   0   7   4   17.83    0.87
   0   7   4   19.05    1.18
   0   7  -4   17.91    1.08
   0   7   4   18.67    1.12
   1   7   4    0.19    0.02
   1   7   4    0.13    0.08
  -1   7  -4    0.31    0.14
   1   7   4    0.39    0.10
   1   7   4    0.24    0.06
   1   7   4    0.17    0.06
  -1   7  -4    0.16    0.08
   1   7   4    0.22    0.06
  -1   7  -4    0.27    0.07
  -1   7  -4    0.26    0.04
   1   7   4    0.18    0.07
   1   7   4    0.28    0.13
  -1   7  -4    0.16    0.07
  -1   7  -4    0.33    0.09
  -2   7  -4    0.82    0.12
   2   7   4    0.93    0.11
   2   7   4    0.84    0.11
  -2   7  -4    0.95    0.12
   2   7   4    0.84    0.11
  -2   7  -4    1.05    0.14
  -2   7  -4    0.76    0.12
   2   7   4    0.98    0.17
  -2   7  -4    1.08    0.10
   2   7   4    0.93    0.11
  -2   7  -4    0.84    0.07
   2   7   4    1.05    0.13
   3   7   4    2.32    0.18
   3   7   4    2.30    0.24
  -3   7  -4    2.52    0.20
  -3   7  -4    2.20    0.15
   3   7   4    2.11    0.18
  -3   7  -4    2.69    0.20
  -3   7  -4    2.20    0.20
   3   7   4    2.35    0.19
  -3   7  -4    2.48    0.32
   3   7   4    2.37    0.20
  -3   7  -4    2.26    0.24
  -3   7  -4    2.46    0.19
  -3   7  -4    2.35    0.24
   3   7   4    2.32    0.21
  -3   7  -4    2.33    0.15
   3   7   4    2.01    0.19
   4   7   4    2.07    0.18
   4   7   4    1.54    0.17
   4   7   4    1.80    0.22
  -4   7  -4    1.86    0.26
  -4   7  -4    1.84    0.17
   4   7   4    1.83    0.16
  -4   7  -4    2.03    0.16
   4   7   4    1.75    0.16
   4   7   4    2.04    0.17
  -4   7  -4    1.72    0.13
  -4   7  -4    1.98    0.18
   5   7   4    0.22    0.14
  -5   7  -4    0.16    0.13
   5   7   4    0.19    0.07
   5   7   4    0.20    0.08
  -5   7  -4    0.28    0.09
   5   7   4    0.22    0.07
  -5   7  -4    0.41    0.11
   5   7   4    0.21    0.07
  -6   7  -4    1.18    0.15
  -6   7  -4    1.20    0.16
   6   7   4    1.28    0.14
   6   7   4    1.30    0.17
   6   7   4    1.31    0.15
  -6   7  -4    1.23    0.12
   6   7   4    1.35    0.17
  -7   7  -4    5.04    0.29
  -7   7  -4    5.06    0.36
   7   7   4    4.73    0.36
   7   7   4    5.49    0.34
   7   7   4    5.56    0.38
  -8   7  -4    2.80    0.25
   8   7   4    3.03    0.23
   8   7   4    2.79    0.24
   9   7   4    8.54    0.46
  -9   7  -4    6.66    0.48
   9   7   4    8.21    0.51
 -10   7  -4    0.01    0.06
  10   7   4    0.06    0.09
  11   7   4    2.68    0.22
 -11   7  -4    1.85    0.19
  12   7   4    0.10    0.06
  11   8  -4    1.19    0.12
  11   8  -4    1.43    0.14
 -11   8   4    1.12    0.13
  10   8  -4    9.79    0.58
 -10   8   4   10.19    0.67
  10   8  -4   10.02    0.61
   9   8  -4    0.94    0.13
   9   8  -4    0.96    0.14
  -9   8   4    0.86    0.13
  -9   8   4    0.99    0.10
   8   8  -4    0.52    0.10
  -8   8   4    0.46    0.11
   8   8  -4    0.53    0.13
  -7   8   4    2.03    0.20
   7   8  -4    2.25    0.22
   7   8  -4    1.86    0.17
   7   8  -4    2.30    0.22
  -7   8   4    1.99    0.24
   7   8  -4    2.14    0.18
  -6   8   4    7.17    0.47
   6   8  -4    7.06    0.44
  -6   8   4    7.67    0.53
   6   8  -4    7.45    0.45
   6   8  -4    7.11    0.42
   6   8  -4    7.31    0.48
  -5   8   4    5.37    0.42
  -5   8   4    5.07    0.51
  -5   8   4    5.83    0.39
   5   8  -4    5.58    0.37
   5   8  -4    5.75    0.37
   5   8  -4    6.13    0.42
   5   8  -4    6.20    0.38
   5   8  -4    5.67    0.39
   5   8  -4    5.77    0.34
   4   8  -4    9.34    0.59
  -4   8   4   10.18    0.61
  -4   8   4    9.65    0.75
   4   8  -4    8.92    0.54
   4   8  -4   10.20    0.60
  -4   8   4   11.05    0.69
   4   8  -4   10.45    0.58
   4   8  -4    9.76    0.62
   3   8  -4   39.05    2.02
  -3   8   4   38.11    2.17
  -3   8   4   38.82    2.39
  -3   8   4   39.83    2.10
   3   8  -4   38.76    2.20
  -3   8   4   40.74    1.80
   3   8  -4   38.21    2.07
   3   8  -4   34.08    2.36
   3   8  -4   36.46    2.15
   2   8  -4   21.75    1.26
  -2   8   4   21.07    1.24
  -2   8   4   20.79    1.01
  -2   8   4   21.54    1.36
  -2   8   4   19.81    1.30
   2   8  -4   20.40    1.23
  -2   8   4   22.49    1.21
   2   8  -4   22.66    1.19
   2   8  -4   20.26    1.34
   2   8  -4   22.87    1.16
   1   8  -4    6.30    0.46
   1   8  -4    7.52    0.44
  -1   8   4    6.63    0.33
  -1   8   4    6.98    0.45
  -1   8   4    6.12    0.52
   1   8  -4    7.09    0.44
   1   8  -4    7.22    0.42
  -1   8   4    6.84    0.41
   1   8  -4    6.67    0.44
  -1   8   4    6.96    0.49
   0   8   4   19.14    1.00
   0   8   4   19.40    1.17
   0   8  -4   19.69    1.02
   0   8   4   17.43    1.23
   0   8   4   17.79    0.85
   0   8  -4   16.88    1.15
   0   8   4   16.78    0.96
   0   8   4   19.54    1.07
   0   8  -4   17.73    0.86
   0   8  -4   17.97    1.07
   0   8   4   17.79    1.13
   0   8  -4   18.76    1.00
   1   8   4   -0.02    0.13
   1   8   4    0.09    0.07
   1   8   4    0.06    0.08
  -1   8  -4    0.02    0.04
  -1   8  -4    0.09    0.10
   1   8   4    0.06    0.10
   1   8   4    0.04    0.09
   1   8   4    0.14    0.08
  -1   8  -4    0.08    0.07
  -1   8  -4    0.16    0.09
   2   8   4   14.81    0.83
   2   8   4   14.70    0.81
   2   8   4   13.86    0.84
  -2   8  -4   15.62    0.83
   2   8   4   15.94    0.98
  -2   8  -4   16.14    0.73
   2   8   4   15.80    0.89
  -2   8  -4   15.25    0.87
   2   8   4   14.13    0.95
  -2   8  -4   14.27    0.97
  -2   8  -4   15.64    0.90
   3   8   4   10.40    0.63
  -3   8  -4    9.84    0.61
  -3   8  -4   10.65    0.52
   3   8   4    9.26    0.69
   3   8   4   10.84    0.58
  -3   8  -4   12.03    0.52
   3   8   4   10.62    0.62
  -3   8  -4   11.12    0.66
   3   8   4   10.91    0.69
  -3   8  -4   10.04    0.69
   3   8   4    9.65    0.59
  -3   8  -4    9.01    0.64
  -3   8  -4   11.06    0.60
  -4   8  -4    0.13    0.08
   4   8   4    0.05    0.08
   4   8   4    0.19    0.07
   4   8   4    0.00    0.08
   4   8   4   -0.02    0.08
   4   8   4    0.03    0.09
  -4   8  -4    0.13    0.08
  -5   8  -4    0.28    0.12
   5   8   4    0.27    0.08
   5   8   4    0.21    0.09
   5   8   4    0.33    0.08
  -5   8  -4    0.27    0.08
   5   8   4    0.22    0.08
   6   8   4    5.32    0.32
   6   8   4    4.02    0.33
   6   8   4    4.79    0.32
  -6   8  -4    5.17    0.36
  -6   8  -4    4.67    0.36
   6   8   4    5.06    0.37
  -7   8  -4    2.15    0.22
   7   8   4    2.29    0.18
  -7   8  -4    2.10    0.20
   7   8   4    2.19    0.23
   7   8   4    2.34    0.20
   8   8   4    2.13    0.17
  -8   8  -4    2.02    0.19
   8   8   4    2.10    0.19
  -8   8  -4    1.82    0.19
  -9   8  -4    6.25    0.44
   9   8   4    7.39    0.47
   9   8   4    7.06    0.39
  10   8   4    0.20    0.11
 -10   8  -4    0.03    0.07
  11   8   4    0.06    0.07
 -10   9   4    0.40    0.07
  10   9  -4    0.32    0.08
   9   9  -4    0.53    0.09
   9   9  -4    0.46    0.08
  -9   9   4    0.49    0.09
   8   9  -4    0.81    0.11
  -8   9   4    0.54    0.12
   8   9  -4    0.80    0.11
  -7   9   4    0.23    0.07
  -7   9   4    0.16    0.08
   7   9  -4    0.36    0.09
   7   9  -4    0.27    0.08
   6   9  -4    1.06    0.14
   6   9  -4    0.78    0.09
   6   9  -4    0.96    0.12
  -6   9   4    1.05    0.13
  -6   9   4    1.34    0.18
   6   9  -4    1.01    0.14
   5   9  -4   10.51    0.60
   5   9  -4    9.11    0.56
  -5   9   4   10.19    0.51
   5   9  -4   10.72    0.62
  -5   9   4   11.37    0.71
   5   9  -4    9.80    0.64
  -5   9   4   10.64    0.63
  -4   9   4    1.92    0.19
   4   9  -4    1.74    0.21
   4   9  -4    2.20    0.21
   4   9  -4    1.79    0.18
  -4   9   4    2.05    0.23
   4   9  -4    1.76    0.16
   4   9  -4    1.98    0.20
   3   9  -4   26.00    1.54
  -3   9   4   26.96    1.56
   3   9  -4   26.31    1.57
  -3   9   4   27.42    1.71
   3   9  -4   28.03    1.45
   3   9  -4   27.46    1.48
   2   9  -4    1.64    0.19
   2   9  -4    1.52    0.16
  -2   9   4    1.55    0.21
   2   9  -4    1.66    0.17
  -2   9   4    1.93    0.19
  -1   9   4   31.15    1.79
   1   9  -4   30.92    1.79
   1   9  -4   31.79    1.71
  -1   9   4   30.76    1.97
   1   9  -4   32.36    1.68
   0   9  -4   15.10    0.81
   0   9   4   14.87    0.87
   0   9   4   14.83    0.81
   0   9  -4   13.70    0.94
   0   9  -4   14.07    0.86
   0   9   4   14.76    0.95
   1   9   4    0.40    0.09
  -1   9  -4    0.23    0.04
   1   9   4    0.18    0.06
  -1   9  -4    0.35    0.10
  -1   9  -4    0.20    0.07
   1   9   4    0.31    0.09
   1   9   4    0.28    0.09
  -1   9  -4    0.23    0.11
   1   9   4    0.13    0.08
  -2   9  -4    8.13    0.58
  -2   9  -4    9.08    0.56
   2   9   4    8.33    0.49
   2   9   4    8.52    0.53
   2   9   4    8.78    0.54
  -2   9  -4    8.72    0.42
   2   9   4    8.15    0.51
  -2   9  -4    9.15    0.51
   2   9   4    8.79    0.59
  -3   9  -4    8.85    0.53
   3   9   4    7.80    0.50
  -3   9  -4    8.68    0.49
   3   9   4    7.64    0.48
   3   9   4    7.97    0.54
   3   9   4    7.87    0.46
  -3   9  -4    7.17    0.54
   4   9   4    7.03    0.45
   4   9   4    7.34    0.43
   4   9   4    7.28    0.47
  -4   9  -4    6.93    0.51
   4   9   4    8.02    0.51
   4   9   4    6.71    0.44
  -4   9  -4    7.91    0.49
   5   9   4    0.92    0.12
   5   9   4    0.99    0.14
  -5   9  -4    0.94    0.12
  -5   9  -4    1.05    0.16
   5   9   4    0.91    0.12
  -6   9  -4    0.29    0.12
   6   9   4    0.05    0.07
   6   9   4    0.06    0.06
  -6   9  -4    0.05    0.06
   6   9   4    0.03    0.08
   7   9   4    9.72    0.63
  -7   9  -4   10.81    0.63
  -7   9  -4    9.93    0.68
   7   9   4   10.85    0.57
   8   9   4    1.28    0.13
  -8   9  -4    1.30    0.14
   8   9   4    1.28    0.14
  -8   9  -4    0.90    0.13
  -9   9  -4    2.37    0.18
   9   9   4    2.82    0.20
   8  10  -4    1.12    0.11
   8  10  -4    1.23    0.12
  -8  10   4    1.12    0.12
   7  10  -4    3.46    0.22
  -7  10   4    2.56    0.20
  -7  10   4    2.81    0.23
   6  10  -4    4.07    0.27
  -6  10   4    4.39    0.29
  -6  10   4    4.36    0.32
   6  10  -4    4.43    0.30
   6  10  -4    4.31    0.29
   5  10  -4    0.79    0.11
  -5  10   4    0.82    0.12
   5  10  -4    0.93    0.12
   5  10  -4    0.70    0.10
  -5  10   4    0.78    0.13
  -4  10   4    0.65    0.13
  -4  10   4    0.72    0.12
   4  10  -4    0.61    0.13
   4  10  -4    0.70    0.11
   4  10  -4    0.44    0.10
  -3  10   4    1.46    0.20
   3  10  -4    1.71    0.20
   3  10  -4    1.53    0.16
   3  10  -4    1.53    0.15
  -3  10   4    1.70    0.17
  -2  10   4    0.05    0.08
   2  10  -4    0.19    0.09
   2  10  -4    0.32    0.10
  -2  10   4    0.15    0.09
  -1  10   4   11.75    0.73
   1  10  -4   11.95    0.68
   1  10  -4   12.19    0.73
  -1  10   4   11.91    0.80
   0  10   4   14.85    0.87
   0  10   4   13.97    0.94
   0  10  -4   14.60    0.81
   0  10  -4   14.20    0.86
   1  10   4   23.72    1.55
  -1  10  -4   24.98    1.33
  -1  10  -4   24.61    1.43
   1  10   4   25.35    1.42
   2  10   4    0.77    0.14
   2  10   4    0.44    0.10
  -2  10  -4    0.58    0.15
  -3  10  -4    1.60    0.21
   3  10   4    1.33    0.15
   3  10   4    1.30    0.14
   3  10   4    1.44    0.15
   4  10   4   15.47    0.96
   4  10   4   14.11    0.79
  -4  10  -4   15.10    0.89
   4  10   4   15.23    0.87
   5  10   4    0.37    0.08
  -5  10  -4    0.28    0.12
   5  10   4    0.32    0.09
   5  10   4    0.27    0.07
  -6  10  -4    0.88    0.12
   6  10   4    0.79    0.10
   6  10   4    0.65    0.11
  -7  10  -4    3.23    0.24
   7  10   4    3.62    0.21
  -8  10  -4    3.52    0.23
  -6  11   4    0.15    0.05
  -6  11   4    0.06    0.05
   5  11  -4    0.21    0.07
  -5  11   4    0.17    0.07
  -5  11   4    0.25    0.07
  -4  11   4    0.66    0.12
  -4  11   4    0.61    0.10
   4  11  -4    0.73    0.10
  -3  11   4    1.20    0.14
   3  11  -4    1.41    0.14
  -3  11   4    1.15    0.14
   3  11  -4    1.24    0.12
  -2  11   4    0.04    0.11
   2  11  -4    0.09    0.06
  -2  11   4    0.04    0.09
   2  11  -4    0.11    0.08
  -1  11   4   16.54    1.09
  -1  11   4   17.43    1.00
   1  11  -4   17.89    1.00
   1  11  -4   16.88    0.93
   0  11   4    1.79    0.19
   0  11   4    1.97    0.18
   0  11  -4    2.22    0.21
   1  11   4    1.27    0.14
  -1  11  -4    1.53    0.15
   1  11   4    1.12    0.13
   2  11   4    0.53    0.11
  -2  11  -4    0.66    0.13
   2  11   4    0.71    0.10
   3  11   4    0.84    0.12
   3  11   4    0.69    0.11
  -3  11  -4    0.72    0.11
  -4  11  -4    9.88    0.56
   4  11   4    8.33    0.59
   4  11   4    9.22    0.54
  -5  11  -4    5.22    0.34
   5  11   4    5.28    0.35
  -6  11  -4    0.61    0.08
  -2  12   4    0.06    0.06
  -1  12   4    2.42    0.17
  -1  12   4    2.05    0.17
   0  12  -4    0.20    0.07
   0  12   4    0.32    0.07
   0  12   4    0.33    0.06
   1  12   4    1.70    0.14
  -1  12  -4    1.63    0.14
   2  12   4    3.87    0.22
  -2  12  -4    2.65    0.21
  15   0  -5    6.52    0.38
  14   0  -5    0.00    0.07
  13   0  -5    3.97    0.28
  11   0  -5    4.03    0.24
  11   0  -5    3.10    0.39
  10   0  -5    0.20    0.07
  10   0  -5    0.00    0.11
  10   0  -5    0.02    0.11
  10   0  -5    0.16    0.07
  10   0  -5    0.00    0.15
   9   0  -5    1.64    0.25
   9   0  -5    1.80    0.25
   9   0  -5    1.49    0.23
   9   0  -5    1.36    0.12
   8   0  -5    0.22    0.09
   8   0  -5   -0.17    0.10
   8   0  -5    0.03    0.10
   8   0  -5   -0.08    0.11
   8   0  -5    0.15    0.06
   7   0  -5    0.84    0.16
   7   0  -5    0.87    0.16
   7   0  -5    0.94    0.16
   6   0  -5    0.04    0.19
  -6   0   5   -0.07    0.14
   6   0  -5   -0.04    0.09
   6   0  -5    0.13    0.07
   6   0  -5   -0.02    0.08
  -5   0   5   21.16    1.40
   5   0  -5   27.24    1.48
   5   0  -5   26.89    1.41
   5   0  -5   22.65    1.54
   5   0  -5   23.91    1.54
  -5   0   5   24.77    1.57
   5   0  -5   25.91    1.40
  -4   0   5    0.13    0.06
  -4   0   5    0.10    0.10
  -4   0   5   -0.01    0.07
   4   0  -5   -0.10    0.05
   4   0  -5    0.01    0.05
  -4   0   5    0.07    0.06
   4   0  -5    0.08    0.09
   4   0  -5    0.10    0.06
   4   0  -5    0.02    0.08
  -3   0   5  430.60   22.87
   3   0  -5  419.88   22.86
  -3   0   5  413.83   23.57
   3   0  -5  406.86   22.75
   3   0  -5  425.76   23.58
  -3   0   5  431.86   22.77
   3   0  -5  407.01   22.12
  -3   0   5  377.73   22.01
   2   0  -5   -0.10    0.08
   2   0  -5   -0.16    0.08
  -2   0   5   -0.20    0.08
  -2   0   5   -0.11    0.06
  -2   0   5   -0.14    0.05
   2   0  -5   -0.17    0.05
   2   0  -5   -0.15    0.05
   2   0  -5   -0.15    0.03
  -2   0   5   -0.12    0.08
  -1   0   5  410.18   22.37
  -1   0   5  370.22   22.10
  -1   0   5  458.42   23.13
  -1   0   5  453.16   23.15
   1   0  -5  460.56   23.14
   1   0  -5  392.85   23.72
   1   0  -5  436.10   23.13
   1   0  -5  389.07   22.48
  -1   0   5  399.48   23.72
   1   0  -5  417.39   22.35
   0   0  -5    0.02    0.03
   0   0  -5    0.04    0.04
   0   0   5    0.06    0.02
   0   0   5    0.00    0.04
   0   0   5    0.02    0.03
   0   0   5   -0.05    0.04
   0   0   5    0.09    0.07
   0   0  -5    0.13    0.03
   0   0  -5   -0.02    0.04
   0   0  -5    0.04    0.05
  -1   0  -5  223.14   12.57
  -1   0  -5  222.65   13.36
  -1   0  -5  242.35   13.01
   1   0   5  234.11   12.48
  -1   0  -5  244.91   12.94
   1   0   5  243.58   12.94
   1   0   5  232.59   13.39
   1   0   5  234.91   12.59
   1   0   5  237.74   12.93
  -2   0  -5   -0.04    0.07
   2   0   5   -0.06    0.04
   2   0   5   -0.12    0.05
  -2   0  -5    0.00    0.06
   2   0   5    0.10    0.06
   2   0   5   -0.02    0.09
  -2   0  -5   -0.08    0.04
  -2   0  -5    0.08    0.09
  -3   0  -5    7.31    0.50
   3   0   5    7.78    0.55
   3   0   5    7.53    0.56
  -3   0  -5    7.23    0.48
  -3   0  -5    8.39    0.56
   3   0   5    8.12    0.50
  -3   0  -5    8.27    0.57
   3   0   5    7.88    0.48
   3   0   5    7.90    0.48
   4   0   5   -0.07    0.12
  -4   0  -5    0.04    0.07
  -4   0  -5    0.19    0.04
   4   0   5    0.04    0.08
  -4   0  -5   -0.11    0.10
   4   0   5   -0.04    0.07
  -4   0  -5   -0.02    0.12
   4   0   5    0.01    0.07
  -4   0  -5    0.07    0.08
   4   0   5    0.07    0.11
   5   0   5    1.85    0.27
   5   0   5    2.30    0.22
   5   0   5    2.13    0.21
  -5   0  -5    1.65    0.27
  -5   0  -5    2.17    0.29
   5   0   5    2.12    0.20
   5   0   5    1.76    0.30
   6   0   5    0.24    0.12
   6   0   5    0.34    0.23
   6   0   5    0.06    0.10
   6   0   5    0.12    0.10
   7   0   5    4.07    0.37
   7   0   5    4.17    0.36
   7   0   5    4.06    0.36
   8   0   5    0.24    0.13
   8   0   5    0.30    0.06
   9   0   5    0.43    0.18
   9   0   5    0.51    0.08
   9   0   5    0.59    0.16
   9   0   5    0.47    0.15
  10   0   5    0.01    0.11
  10   0   5    0.01    0.13
  10   0   5   -0.05    0.10
  11   0   5   50.97    2.93
  12   0   5    0.20    0.13
  13   0   5   24.20    1.33
  13   0   5   24.69    1.43
  14   0   5    0.01    0.05
  14   0   5    0.01    0.06
  15  -1  -5    3.24    0.21
  15   1  -5    3.25    0.21
  14  -1  -5    0.22    0.11
  14   1  -5    0.05    0.11
  13   1  -5    5.64    0.36
  12  -1  -5    3.49    0.24
  12   1  -5    3.35    0.28
  11  -1  -5   25.31    1.59
  11   1  -5   26.05    1.24
  11   1  -5   22.79    1.51
  11   1  -5   27.51    1.30
  11   1  -5   24.28    1.60
  11   1  -5   28.85    1.43
  10  -1  -5    3.26    0.22
  10  -1  -5    3.41    0.38
  10   1  -5    3.16    0.25
  10   1  -5    3.51    0.40
  10   1  -5    3.35    0.21
  10   1  -5    3.09    0.20
   9   1  -5   44.99    2.17
   9   1  -5   48.95    2.66
   9   1  -5   41.37    2.64
   9   1  -5   50.72    2.62
   8  -1  -5    2.70    0.33
   8   1  -5    3.15    0.31
   8   1  -5    2.69    0.18
   8   1  -5    3.43    0.32
   8   1  -5    3.00    0.19
   8   1  -5    3.04    0.30
   8   1  -5    3.32    0.31
   7  -1  -5    0.98    0.18
   7  -1  -5    0.94    0.18
   7   1  -5    1.15    0.18
   7   1  -5    0.79    0.16
   7   1  -5    0.94    0.16
   7   1  -5    1.02    0.16
   6  -1  -5   32.06    1.84
   6  -1  -5   30.55    1.74
   6  -1  -5   28.42    1.92
   6  -1  -5   25.56    1.93
  -6   1   5   27.33    1.92
   6   1  -5   32.62    1.75
   6   1  -5   32.82    1.82
   6   1  -5   32.65    1.72
   6   1  -5   31.71    1.76
   5  -1  -5    0.75    0.19
   5  -1  -5    0.65    0.12
  -5  -1   5    0.51    0.16
   5  -1  -5    0.57    0.20
  -5   1   5    0.70    0.13
   5   1  -5    0.61    0.15
   5   1  -5    0.65    0.11
   5   1  -5    0.66    0.17
   5   1  -5    0.54    0.12
   5   1  -5    0.71    0.11
  -5   1   5    0.64    0.21
   5   1  -5    0.79    0.11
   4  -1  -5    2.17    0.21
  -4  -1   5    2.42    0.26
   4  -1  -5    2.29    0.30
  -4  -1   5    2.14    0.26
   4  -1  -5    2.28    0.30
   4  -1  -5    2.28    0.21
  -4  -1   5    1.95    0.21
   4   1  -5    1.84    0.18
   4   1  -5    2.04    0.25
  -4   1   5    2.37    0.23
   4   1  -5    2.49    0.21
  -4   1   5    2.42    0.22
   4   1  -5    2.30    0.19
   4   1  -5    2.07    0.25
   4   1  -5    2.21    0.19
  -4   1   5    2.35    0.31
   4   1  -5    1.80    0.18
   4   1  -5    1.86    0.15
  -4   1   5    2.67    0.31
   4   1  -5    2.72    0.19
   3  -1  -5  201.98   10.95
   3  -1  -5  190.31   11.18
  -3  -1   5  175.56   11.17
   3  -1  -5  197.83   10.53
   3  -1  -5  203.08   10.95
  -3  -1   5  212.69   10.92
  -3  -1   5  213.67   10.93
  -3   1   5  203.71   10.95
   3   1  -5  205.92   10.92
   3   1  -5  174.76   11.16
  -3   1   5  212.53   10.97
   3   1  -5  193.75   10.71
   3   1  -5  206.22   10.66
   3   1  -5  203.74   10.91
   3   1  -5  175.64   10.52
  -3   1   5  191.86   10.54
  -3   1   5  192.76   11.19
   3   1  -5  203.10   11.29
   3   1  -5  200.61   10.76
   2  -1  -5  336.66   18.33
  -2  -1   5  353.77   18.94
   2  -1  -5  368.72   18.94
   2  -1  -5  369.83   18.98
  -2  -1   5  344.62   18.80
  -2  -1   5  319.93   19.33
   2  -1  -5  332.63   19.47
   2   1  -5  312.87   18.79
  -2   1   5  346.62   19.50
  -2   1   5  382.56   18.94
   2   1  -5  337.63   19.42
   2   1  -5  301.31   18.20
   2   1  -5  336.36   18.79
  -2   1   5  355.80   18.42
   2   1  -5  336.51   18.51
  -2   1   5  356.17   18.95
   2   1  -5  352.40   18.37
   2   1  -5  323.79   19.42
   1  -1  -5   30.51    1.65
   1  -1  -5   29.21    1.65
   1  -1  -5   27.42    1.64
  -1  -1   5   27.97    1.64
  -1  -1   5   29.73    1.63
  -1  -1   5   30.80    1.64
   1  -1  -5   26.99    1.55
   1   1  -5   27.72    1.55
  -1   1   5   27.02    1.54
   1   1  -5   25.67    1.62
   1   1  -5   29.70    1.64
   1   1  -5   29.46    1.64
  -1   1   5   27.33    1.55
  -1   1   5   29.59    1.65
   1   1  -5   28.13    1.57
  -1   1   5   28.81    1.65
  -1   1   5   28.62    1.65
   0  -1   5    3.44    0.28
   0  -1  -5    3.13    0.23
   0  -1   5    3.60    0.27
   0  -1   5    3.12    0.23
   0  -1  -5    3.41    0.25
   0  -1   5    3.30    0.25
   0  -1  -5    3.89    0.29
   0  -1  -5    4.19    0.29
   0   1  -5    3.56    0.28
   0   1  -5    3.52    0.23
   0   1  -5    3.64    0.24
   0   1  -5    3.37    0.25
   0   1   5    3.45    0.23
   0   1  -5    3.34    0.24
   0   1   5    3.70    0.25
   0   1  -5    3.44    0.27
   0   1   5    3.39    0.23
   0   1   5    3.60    0.27
   0   1   5    3.15    0.24
   1  -1   5  207.51   12.16
   1  -1   5  225.80   11.85
   1  -1   5  223.16   11.84
  -1  -1  -5  233.77   11.84
  -1  -1  -5  228.10   11.91
   1  -1   5  199.94   11.45
  -1  -1  -5  197.17   12.13
   1   1   5  205.84   11.47
  -1   1  -5  221.82   11.86
   1   1   5  206.42   11.88
   1   1   5  214.87   11.82
  -1   1  -5  213.70   11.55
  -1   1  -5  229.58   11.85
   1   1   5  185.13   11.44
   1   1   5  218.90   11.53
   1   1   5  223.31   12.27
  -1   1  -5  222.30   12.26
   2  -1   5  243.90   13.73
  -2  -1  -5  266.73   14.19
  -2  -1  -5  237.98   14.54
   2  -1   5  267.07   14.20
   2  -1   5  270.50   14.22
  -2  -1  -5  273.31   14.18
   2  -1   5  237.56   14.66
   2   1   5  252.64   14.04
   2   1   5  261.36   13.83
   2   1   5  276.21   13.73
  -2   1  -5  272.93   14.20
   2   1   5  231.18   13.69
  -2   1  -5  269.02   14.22
   2   1   5  261.17   14.62
  -2   1  -5  246.45   14.68
   2   1   5  262.75   14.18
   2   1   5  257.86   14.17
  -2   1  -5  252.16   13.78
  -3  -1  -5   47.31    3.14
   3  -1   5   48.13    3.15
  -3  -1  -5   55.02    3.12
   3  -1   5   58.68    3.16
   3  -1   5   52.90    3.01
   3  -1   5   56.20    3.16
  -3  -1  -5   58.82    3.14
   3  -1   5   57.06    2.98
   3   1   5   53.72    3.03
   3   1   5   57.34    3.12
  -3   1  -5   57.02    2.99
   3   1   5   56.36    2.97
   3   1   5   55.88    3.15
   3   1   5   52.90    3.13
  -3   1  -5   54.43    3.13
  -3   1  -5   59.61    3.18
  -3   1  -5   55.11    3.15
  -3   1  -5   53.89    3.16
  -4  -1  -5  239.84   12.70
   4  -1   5  224.89   12.74
   4  -1   5  226.62   12.73
   4  -1   5  235.25   12.99
  -4  -1  -5  244.24   12.71
   4  -1   5  222.38   12.42
   4  -1   5  226.87   12.23
  -4   1  -5  226.03   12.99
  -4   1  -5  220.70   12.89
   4   1   5  227.46   12.44
  -4   1  -5  229.67   12.74
  -4   1  -5  221.33   12.24
   4   1   5  238.01   12.22
   4   1   5  228.77   12.70
   4   1   5  232.29   12.69
  -4   1  -5  224.10   12.72
   4   1   5  232.40   13.04
   5  -1   5   36.73    2.04
   5  -1   5   36.96    2.22
  -5  -1  -5   34.56    2.17
   5  -1   5   38.14    2.15
   5  -1   5   39.00    2.04
   5  -1   5   34.46    2.23
   5   1   5   38.22    2.06
  -5   1  -5   34.74    2.09
   5   1   5   29.84    2.16
  -5   1  -5   36.87    2.24
   5   1   5   37.99    2.13
  -5   1  -5   37.21    2.15
  -5   1  -5   35.92    2.03
  -5   1  -5   35.23    2.20
   5   1   5   38.51    2.01
   5   1   5   36.07    2.17
   6  -1   5    0.30    0.13
   6  -1   5    0.06    0.23
   6  -1   5    0.10    0.11
   6   1   5    0.29    0.11
   6   1   5    0.18    0.10
  -6   1  -5    0.13    0.19
   6   1   5    0.20    0.09
   7  -1   5    0.12    0.11
   7  -1   5    0.10    0.13
   7  -1   5    0.17    0.13
   7   1   5    0.18    0.11
   7   1   5    0.05    0.11
   8  -1   5    0.12    0.14
   8  -1   5    0.12    0.05
   8   1   5    0.10    0.11
   8   1   5    0.42    0.15
   8   1   5    0.21    0.07
   8   1   5    0.13    0.12
   9  -1   5    1.79    0.30
   9   1   5    2.00    0.30
   9   1   5    1.88    0.26
   9   1   5    2.13    0.21
  10  -1   5    1.86    0.33
  10   1   5    1.16    0.15
  11  -1   5    8.53    0.55
  11   1   5    8.54    0.56
  11   1   5    8.45    0.51
  12  -1   5    2.20    0.20
  12   1   5    2.53    0.24
  12   1   5    2.18    0.18
  13  -1   5   35.01    1.83
  13  -1   5   31.64    2.00
  13  -1   5   36.05    1.87
  13   1   5   35.21    1.88
  13   1   5   36.37    2.02
  14  -1   5    1.13    0.11
  14   1   5    1.22    0.15
  14   1   5    1.31    0.09
  15  -2  -5    0.60    0.08
  15   2  -5    0.82    0.09
  14  -2  -5    7.29    0.40
  14   2  -5    5.57    0.38
  13   2  -5    4.13    0.29
  12   2  -5   15.42    0.84
  12   2  -5   14.16    0.89
  11  -2  -5   24.03    1.55
  11   2  -5   27.08    1.39
  11   2  -5   24.23    1.48
  10   2  -5   14.62    0.96
  10   2  -5   17.17    0.91
  10   2  -5   15.62    1.07
  10   2  -5   16.51    0.79
   9  -2  -5    7.01    0.44
   9   2  -5    8.38    0.60
   9   2  -5    7.84    0.40
   9   2  -5    7.01    0.48
   9   2  -5    7.64    0.58
   9   2  -5    8.45    0.47
   8   2  -5    3.71    0.34
   8   2  -5    3.54    0.21
   8   2  -5    3.36    0.21
   8   2  -5    3.84    0.25
   8   2  -5    3.35    0.25
   8   2  -5    3.50    0.31
   8   2  -5    4.18    0.38
   8   2  -5    3.02    0.24
   8   2  -5    3.68    0.32
   7  -2  -5   10.39    0.76
   7  -2  -5    9.31    0.72
   7   2  -5   11.94    0.70
   7   2  -5   11.78    0.74
   7   2  -5   11.43    0.74
   7   2  -5   11.79    0.73
   6  -2  -5   12.74    0.83
   6  -2  -5   11.04    0.97
   6  -2  -5   11.39    0.78
  -6   2   5   10.41    0.93
   6   2  -5   13.70    0.79
  -6   2   5   12.14    0.79
  -6   2   5   12.56    0.84
   6   2  -5   12.92    0.79
   6   2  -5   13.47    0.80
   6   2  -5   13.72    0.75
  -5  -2   5   20.88    1.30
   5  -2  -5   19.49    1.21
   5  -2  -5   20.33    1.38
   5  -2  -5   20.73    1.28
   5  -2  -5   20.18    1.40
   5   2  -5   18.20    1.18
   5   2  -5   23.53    1.18
   5   2  -5   21.84    1.22
  -5   2   5   21.01    1.29
   5   2  -5   22.68    1.24
  -5   2   5   20.90    1.22
  -5   2   5   20.11    1.37
   5   2  -5   19.09    1.29
   5   2  -5   23.15    1.23
   5   2  -5   20.29    1.28
  -5   2   5   20.71    1.40
   4  -2  -5   78.92    4.40
   4  -2  -5   76.84    4.40
  -4  -2   5   80.44    4.33
   4  -2  -5   77.99    4.40
  -4  -2   5   78.34    4.32
   4  -2  -5   74.32    4.15
  -4   2   5   80.74    4.16
   4   2  -5   68.39    4.36
   4   2  -5   69.38    4.12
   4   2  -5   76.15    4.31
   4   2  -5   79.82    4.22
   4   2  -5   74.94    4.18
   4   2  -5   82.36    4.12
   4   2  -5   78.02    4.36
   4   2  -5   75.39    4.31
   4   2  -5   67.00    4.33
  -4   2   5   78.28    4.40
  -4   2   5   81.49    4.42
  -4   2   5   81.28    4.42
   3  -2  -5   15.03    0.98
  -3  -2   5   15.51    0.91
   3  -2  -5   14.21    0.90
  -3  -2   5   13.98    0.90
   3  -2  -5   14.92    0.87
   3  -2  -5   15.79    0.98
   3   2  -5   14.78    0.90
   3   2  -5   16.23    0.88
  -3   2   5   16.44    1.00
  -3   2   5   16.22    0.90
   3   2  -5   14.90    0.87
   3   2  -5   14.57    0.87
  -3   2   5   15.52    0.92
   3   2  -5   14.25    0.88
   3   2  -5   15.14    0.91
   3   2  -5   13.48    0.88
  -3   2   5   14.49    0.97
   3   2  -5   13.47    0.83
   3   2  -5   14.67    0.83
  -3   2   5   15.75    0.87
   2  -2  -5  117.85    6.20
  -2  -2   5  111.93    6.13
   2  -2  -5  107.07    5.94
   2  -2  -5  110.00    6.20
  -2  -2   5  120.13    6.15
   2  -2  -5  102.54    6.29
   2   2  -5  114.41    5.99
   2   2  -5  100.86    6.13
  -2   2   5  116.27    6.20
  -2   2   5  106.73    5.89
   2   2  -5  103.53    6.26
   2   2  -5  111.14    5.91
   2   2  -5  111.73    6.14
  -2   2   5  118.91    6.21
   2   2  -5  107.52    6.28
   2   2  -5  105.66    5.91
   2   2  -5  110.84    6.03
  -2   2   5  114.65    6.27
   2   2  -5  113.04    6.33
  -2   2   5  115.42    5.94
  -2   2   5  112.53    6.30
   1  -2  -5    0.53    0.12
  -1  -2   5    0.32    0.08
   1  -2  -5    0.49    0.11
  -1  -2   5    0.35    0.09
   1  -2  -5    0.35    0.07
   1   2  -5    0.34    0.08
   1   2  -5    0.31    0.08
  -1   2   5    0.33    0.07
  -1   2   5    0.31    0.07
   1   2  -5    0.40    0.09
  -1   2   5    0.37    0.11
  -1   2   5    0.41    0.08
   1   2  -5    0.23    0.03
   1   2  -5    0.41    0.06
  -1   2   5    0.35    0.09
   1   2  -5    0.27    0.05
   1   2  -5    0.26    0.08
   1   2  -5    0.36    0.06
   1   2  -5    0.30    0.05
  -1   2   5    0.36    0.10
  -1   2   5    0.41    0.08
   0  -2   5  107.53    5.39
   0  -2   5  101.11    5.39
   0  -2  -5  100.04    5.38
   0  -2  -5  101.42    5.39
   0   2   5   97.95    5.38
   0   2  -5  102.48    5.39
   0   2  -5   91.70    5.49
   0   2   5   99.44    5.55
   0   2   5   97.90    5.38
   0   2  -5   95.72    5.48
   0   2  -5   98.06    5.49
   0   2   5   90.57    5.49
   0   2  -5  100.62    5.18
   0   2   5   96.11    5.17
   0   2  -5   90.90    5.17
   0   2  -5   99.61    5.24
   0   2   5   94.90    5.15
   0   2  -5   84.69    5.12
   0   2  -5  100.17    5.38
   0   2   5   89.80    5.17
   1  -2   5   26.66    1.48
   1  -2   5   26.25    1.47
  -1  -2  -5   26.60    1.45
   1  -2   5   23.93    1.45
  -1  -2  -5   26.13    1.44
   1  -2   5   21.89    1.37
   1   2   5   25.19    1.44
   1   2   5   24.26    1.40
   1   2   5   25.20    1.37
   1   2   5   25.61    1.36
   1   2   5   22.48    1.35
  -1   2  -5   27.09    1.46
  -1   2  -5   25.66    1.40
   1   2   5   23.82    1.44
   1   2   5   25.36    1.44
  -1   2  -5   25.69    1.48
   1   2   5   23.78    1.36
   1   2   5   25.23    1.43
  -1   2  -5   25.35    1.46
  -1   2  -5   25.68    1.38
   2  -2   5  181.78    9.82
  -2  -2  -5  184.64    9.76
   2  -2   5  183.84    9.80
  -2  -2  -5  185.72    9.75
   2  -2   5  174.96   10.01
   2  -2   5  167.11    9.43
  -2   2  -5  181.97    9.43
  -2   2  -5  174.18    9.96
  -2   2  -5  186.52   10.16
   2   2   5  161.57    9.42
   2   2   5  179.59    9.35
   2   2   5  176.62   10.11
  -2   2  -5  187.76    9.82
   2   2   5  174.43    9.74
   2   2   5  174.07    9.59
   2   2   5  182.61    9.75
   2   2   5  158.37    9.47
   2   2   5  177.92    9.46
  -2   2  -5  182.41    9.80
   2   2   5  163.76    9.98
   3  -2   5   15.41    0.94
   3  -2   5   17.01    1.07
  -3  -2  -5   16.66    0.99
  -3  -2  -5   16.70    1.00
   3  -2   5   15.34    0.99
   3  -2   5   17.00    1.08
   3  -2   5   15.31    0.91
   3   2   5   16.77    0.96
  -3   2  -5   16.26    0.98
   3   2   5   17.52    0.96
  -3   2  -5   17.55    0.95
  -3   2  -5   17.50    1.08
   3   2   5   14.71    0.96
  -3   2  -5   16.55    1.05
  -3   2  -5   16.06    0.99
   3   2   5   16.53    0.99
   3   2   5   17.03    0.91
   3   2   5   18.11    0.93
   3   2   5   16.28    0.99
   3   2   5   14.14    0.90
   3   2   5   14.79    0.91
   4  -2   5   39.89    2.24
   4  -2   5   38.41    2.44
   4  -2   5   37.99    2.23
  -4  -2  -5   42.86    2.35
   4  -2   5   40.06    2.37
  -4  -2  -5   41.59    2.36
   4  -2   5   41.77    2.43
   4   2   5   35.17    2.20
  -4   2  -5   42.44    2.24
   4   2   5   39.34    2.35
  -4   2  -5   38.97    2.41
   4   2   5   42.26    2.34
   4   2   5   41.36    2.28
   4   2   5   43.99    2.20
  -4   2  -5   39.93    2.34
  -4   2  -5   43.68    2.44
  -4   2  -5   43.06    2.37
   4   2   5   39.69    2.22
   4   2   5   36.71    2.33
   4   2   5   41.65    2.35
   5  -2   5   11.93    1.06
   5  -2   5   14.89    0.96
   5  -2   5   14.29    0.87
   5   2   5   16.94    0.93
  -5   2  -5   16.28    0.97
   5   2   5   14.67    0.87
  -5   2  -5   15.24    0.92
  -5   2  -5   14.89    0.91
  -5   2  -5   14.42    1.06
   5   2   5   16.02    0.93
  -5   2  -5   14.25    1.05
   6  -2   5   11.47    0.76
   6  -2   5   11.07    0.80
   6   2   5   11.75    0.73
   6   2   5   12.84    0.73
   6   2   5   12.58    0.78
  -6   2  -5   11.31    0.76
   6   2   5   12.18    0.76
  -6   2  -5   11.56    0.80
   7   2   5    1.82    0.13
   7   2   5    1.77    0.16
   7   2   5    1.97    0.22
   7   2   5    2.11    0.23
   7   2   5    1.82    0.21
   7   2   5    2.22    0.25
   8  -2   5   55.16    3.36
   8   2   5   70.04    3.66
   8   2   5   62.26    3.26
   8   2   5   63.79    3.41
   8   2   5   66.98    3.58
   8   2   5   67.38    3.75
   9   2   5    0.85    0.12
   9   2   5    1.18    0.15
   9   2   5    0.93    0.11
   9   2   5    0.95    0.20
   9   2   5    1.01    0.12
  10   2   5    3.89    0.31
  10   2   5    3.56    0.27
  11  -2   5    2.92    0.24
  11   2   5    2.86    0.24
  11   2   5    2.62    0.23
  12  -2   5    1.77    0.17
  12   2   5    1.86    0.19
  12   2   5    2.39    0.24
  13   2   5    3.47    0.28
  14  -2   5    1.41    0.12
  14   2   5    1.55    0.14
  14   3  -5    9.77    0.56
  13   3  -5    0.13    0.11
  13   3  -5    0.04    0.07
  12   3  -5    0.16    0.11
  12   3  -5    0.05    0.12
  11   3  -5   20.91    1.11
  11   3  -5   18.39    1.17
  10   3  -5   24.00    1.40
  10   3  -5   26.11    1.37
  10   3  -5   24.30    1.46
  10   3  -5   24.74    1.56
   9   3  -5   10.64    0.64
   9   3  -5   10.45    0.79
   9   3  -5   10.17    0.77
   9   3  -5   12.45    0.55
   9   3  -5   10.22    0.68
   8   3  -5    0.74    0.12
   8   3  -5    1.00    0.11
   8   3  -5    0.70    0.19
   8   3  -5    0.46    0.11
   8   3  -5    0.55    0.13
   7   3  -5   17.80    1.06
   7   3  -5   17.34    1.05
  -7   3   5   14.83    1.04
   7   3  -5   15.73    0.91
   7   3  -5   15.11    0.82
   7   3  -5   16.57    0.96
   7   3  -5   17.24    1.02
   7   3  -5   15.87    0.79
  -7   3   5   19.27    1.13
   7   3  -5   17.37    0.87
   6   3  -5    0.27    0.08
  -6   3   5    0.14    0.12
  -6   3   5   -0.02    0.11
   6   3  -5    0.06    0.09
   6   3  -5    0.07    0.09
   6   3  -5    0.03    0.06
   5  -3  -5   40.76    2.87
   5   3  -5   43.75    2.74
  -5   3   5   45.53    2.90
   5   3  -5   50.16    2.68
   5   3  -5   49.87    2.59
  -5   3   5   51.26    2.67
   5   3  -5   44.29    2.74
  -5   3   5   51.81    2.82
   5   3  -5   45.07    2.59
   5   3  -5   50.85    2.74
   5   3  -5   52.03    2.70
  -4  -3   5    3.67    0.30
   4  -3  -5    3.77    0.42
   4  -3  -5    3.76    0.44
  -4  -3   5    3.07    0.29
  -4   3   5    4.08    0.33
   4   3  -5    3.77    0.25
   4   3  -5    4.23    0.31
  -4   3   5    3.86    0.44
   4   3  -5    4.26    0.26
   4   3  -5    4.01    0.31
   4   3  -5    3.70    0.31
   4   3  -5    4.25    0.25
   4   3  -5    3.87    0.26
   4   3  -5    3.73    0.28
   4   3  -5    3.77    0.30
  -4   3   5    3.40    0.40
  -4   3   5    4.38    0.33
  -4   3   5    4.05    0.31
   3  -3  -5    0.60    0.18
  -3  -3   5    0.89    0.11
  -3  -3   5    0.81    0.11
   3  -3  -5    1.32    0.24
  -3   3   5    1.30    0.16
  -3   3   5    0.90    0.20
   3   3  -5    0.82    0.14
   3   3  -5    0.76    0.11
  -3   3   5    0.78    0.14
   3   3  -5    0.75    0.11
  -3   3   5    1.09    0.13
   3   3  -5    0.87    0.09
   3   3  -5    0.96    0.08
   3   3  -5    0.80    0.12
   3   3  -5    0.76    0.12
  -3   3   5    1.16    0.21
   3   3  -5    0.91    0.08
  -3   3   5    0.93    0.14
   3   3  -5    0.91    0.08
   2  -3  -5   60.50    3.36
  -2  -3   5   62.32    3.27
   2  -3  -5   58.80    3.37
  -2  -3   5   60.91    3.28
  -2   3   5   62.81    3.19
   2   3  -5   58.64    3.36
   2   3  -5   61.38    3.33
  -2   3   5   50.90    3.36
   2   3  -5   62.20    3.28
   2   3  -5   61.54    3.33
  -2   3   5   63.40    3.38
  -2   3   5   50.45    3.19
  -2   3   5   60.54    3.37
   2   3  -5   55.57    3.14
   2   3  -5   58.44    3.12
   2   3  -5   61.02    3.23
  -2   3   5   55.04    3.16
  -2   3   5   50.25    3.17
   2   3  -5   62.55    3.14
   2   3  -5   56.71    3.27
  -2   3   5   57.63    3.36
  -2   3   5   60.99    3.38
   2   3  -5   61.16    3.23
   1  -3  -5   13.67    0.86
   1  -3  -5   14.55    0.88
  -1  -3   5   14.48    0.82
  -1  -3   5   14.14    0.82
  -1   3   5   13.46    0.86
   1   3  -5   14.24    0.81
   1   3  -5   14.03    0.82
  -1   3   5   14.07    0.83
   1   3  -5   13.89    0.76
   1   3  -5   14.22    0.80
  -1   3   5   14.35    0.78
  -1   3   5   12.56    0.77
   1   3  -5   13.77    0.85
  -1   3   5   13.89    0.86
   1   3  -5   12.68    0.75
   1   3  -5   14.56    0.83
  -1   3   5   12.84    0.82
  -1   3   5   12.87    0.79
   1   3  -5   13.37    0.76
  -1   3   5   12.83    0.78
  -1   3   5   14.89    0.85
   1   3  -5   14.17    0.80
   0  -3   5    0.26    0.09
   0  -3  -5    0.28    0.10
   0  -3   5    0.19    0.08
   0  -3  -5    0.20    0.08
   0   3  -5    0.27    0.06
   0   3  -5    0.26    0.09
   0   3  -5    0.32    0.05
   0   3  -5    0.31    0.06
   0   3   5    0.22    0.06
   0   3   5    0.29    0.06
   0   3   5    0.28    0.09
   0   3   5    0.20    0.07
   0   3  -5    0.20    0.05
   0   3  -5    0.26    0.05
   0   3   5    0.28    0.06
   0   3  -5    0.24    0.08
   0   3   5    0.33    0.07
   0   3   5    0.22    0.08
   0   3  -5    0.27    0.09
   0   3  -5    0.23    0.07
   0   3   5    0.20    0.05
   0   3   5    0.19    0.08
  -1  -3  -5   20.30    1.15
   1  -3   5   20.08    1.20
  -1  -3  -5   19.51    1.15
   1  -3   5   19.67    1.20
   1   3   5   19.73    1.14
  -1   3  -5   21.11    1.21
  -1   3  -5   19.47    1.19
  -1   3  -5   19.49    1.18
  -1   3  -5   18.48    1.16
   1   3   5   20.85    1.11
   1   3   5   18.90    1.14
  -1   3  -5   18.00    1.09
   1   3   5   18.91    1.08
   1   3   5   18.22    1.09
   1   3   5   21.59    1.18
   1   3   5   19.54    1.07
   1   3   5   21.35    1.14
   1   3   5   19.32    1.15
  -1   3  -5   21.65    1.11
  -1   3  -5   19.99    1.16
   1   3   5   19.52    1.12
   2  -3   5    9.73    0.72
   2  -3   5    9.87    0.72
  -2  -3  -5   11.87    0.64
  -2  -3  -5   10.21    0.63
   2   3   5   10.53    0.58
   2   3   5    9.49    0.63
   2   3   5   10.41    0.61
  -2   3  -5    9.95    0.72
  -2   3  -5    9.49    0.66
   2   3   5   12.05    0.62
   2   3   5    8.80    0.59
  -2   3  -5   10.44    0.62
   2   3   5   10.10    0.62
   2   3   5   11.34    0.58
   2   3   5    9.61    0.61
   2   3   5   11.32    0.64
  -2   3  -5   10.16    0.65
   3  -3   5  161.79    8.98
  -3  -3  -5  164.27    8.87
   3  -3   5  158.95    9.00
  -3  -3  -5  162.44    8.88
   3   3   5  149.54    9.08
   3   3   5  161.24    8.75
  -3   3  -5  153.98    8.96
  -3   3  -5  176.81    9.13
   3   3   5  158.47    8.87
  -3   3  -5  167.95    8.61
   3   3   5  150.70    8.86
   3   3   5  170.93    8.53
  -3   3  -5  163.82    9.09
   3   3   5  148.61    8.63
   3   3   5  157.80    8.61
  -3   3  -5  159.72    8.99
   3   3   5  171.80    9.16
   3   3   5  155.76    8.55
   4  -3   5  251.07   15.01
  -4  -3  -5  266.77   14.88
   4   3   5  293.82   14.29
  -4   3  -5  270.06   15.21
  -4   3  -5  260.98   14.98
   4   3   5  287.89   14.66
  -4   3  -5  293.29   15.41
   4   3   5  239.70   15.24
  -4   3  -5  267.59   15.01
   4   3   5  258.14   14.49
  -4   3  -5  282.49   14.42
  -5   3  -5    0.00    0.08
   5   3   5    0.02    0.06
  -5   3  -5    0.86    0.27
   5   3   5    0.20    0.13
  -5   3  -5    0.06    0.10
   5   3   5    0.19    0.07
   5   3   5    0.07    0.07
   6   3   5  202.92   11.03
  -6   3  -5  189.55   11.10
  -6   3  -5  187.44   10.47
   6   3   5  194.28   10.64
   6   3   5  199.15   10.39
   7   3   5    8.36    0.56
   7   3   5    8.02    0.46
   7   3   5    8.58    0.53
   7   3   5    8.97    0.64
   7   3   5    7.99    0.52
   7   3   5    7.68    0.42
   7   3   5    8.64    0.41
   8   3   5   11.41    0.78
   8   3   5   11.39    0.69
   8   3   5   10.74    0.53
   8   3   5   11.40    0.68
   8   3   5   11.43    0.73
   8   3   5   10.73    0.59
   8   3   5    9.64    0.62
   9   3   5    6.79    0.38
   9   3   5    5.48    0.47
   9   3   5    7.09    0.34
   9   3   5    6.03    0.40
   9   3   5    6.85    0.44
  10   3   5    1.55    0.19
  10   3   5    2.29    0.24
  11   3   5    8.35    0.54
  11   3   5    8.05    0.49
  12   3   5    0.08    0.09
  13   3   5    1.16    0.14
  14  -3   5    9.07    0.52
  14   3   5    9.70    0.57
  14   4  -5    0.03    0.07
  14   4  -5    0.07    0.07
  13   4  -5    2.79    0.23
  13   4  -5    3.52    0.25
  12   4  -5    0.40    0.13
  12   4  -5    0.38    0.12
  11   4  -5    0.01    0.08
  11   4  -5   -0.02    0.11
  10   4  -5   25.96    1.54
  10   4  -5   26.72    1.48
  10   4  -5   28.07    1.45
  10   4  -5   23.27    1.62
   9   4  -5   22.41    1.48
   9   4  -5   23.52    1.13
   9   4  -5   25.81    1.36
   9   4  -5   23.53    1.41
   9   4  -5   24.45    1.32
   9   4  -5   22.65    1.48
   8   4  -5    1.37    0.14
   8   4  -5    1.09    0.13
   8   4  -5    1.23    0.15
   8   4  -5    1.22    0.16
   8   4  -5    0.88    0.11
  -8   4   5    1.18    0.13
   8   4  -5    0.91    0.22
   8   4  -5    1.18    0.10
   7   4  -5    7.58    0.50
   7   4  -5    8.51    0.53
  -7   4   5    8.29    0.63
  -7   4   5    8.80    0.49
   7   4  -5    8.72    0.62
   7   4  -5    8.62    0.48
  -7   4   5    7.89    0.63
   7   4  -5    8.83    0.46
   7   4  -5    7.20    0.47
   7   4  -5    8.83    0.41
   7   4  -5    8.21    0.49
   7   4  -5    8.59    0.51
   6   4  -5   16.67    1.05
   6   4  -5   18.03    0.97
  -6   4   5   19.06    1.17
   6   4  -5   16.82    0.84
   6   4  -5   19.21    1.11
   6   4  -5   17.41    0.98
   6   4  -5   18.38    1.03
   6   4  -5   17.05    1.03
   6   4  -5   19.27    1.04
   6   4  -5   17.14    0.97
  -6   4   5   18.25    1.11
   6   4  -5   18.14    1.11
  -5   4   5   47.78    2.74
  -5   4   5   45.99    2.59
   5   4  -5   45.49    2.62
  -5   4   5   47.17    2.71
   5   4  -5   45.23    2.61
   4   4  -5    6.42    0.48
  -4   4   5    7.22    0.50
   4   4  -5    7.45    0.50
   4   4  -5    7.36    0.50
  -4   4   5    7.92    0.52
  -4   4   5    7.39    0.52
  -4   4   5    6.75    0.49
  -3   4   5   20.16    1.23
   3   4  -5   20.74    1.19
   3   4  -5   19.02    1.22
  -3   4   5   20.10    1.17
  -3   4   5   19.03    1.31
  -3   4   5   21.50    1.25
   3   4  -5   20.55    1.18
  -3   4   5   20.72    1.17
   2  -4  -5   60.14    3.55
   2  -4  -5   58.51    3.57
   2   4  -5   65.79    3.42
  -2   4   5   59.93    3.35
  -2   4   5   55.92    3.53
  -2   4   5   69.40    3.58
  -2   4   5   62.12    3.56
   2   4  -5   61.26    3.56
  -2   4   5   60.23    3.55
   2   4  -5   61.06    3.30
  -2   4   5   66.64    3.36
   1  -4  -5   14.68    0.97
  -1  -4   5   14.57    0.90
   1  -4  -5   15.79    0.96
  -1  -4   5   14.80    0.90
   1   4  -5   15.22    0.89
   1   4  -5   15.66    0.89
  -1   4   5   16.69    0.87
  -1   4   5   13.78    0.86
   1   4  -5   15.75    0.84
  -1   4   5   16.08    0.90
   1   4  -5   14.92    0.89
   1   4  -5   15.06    0.91
  -1   4   5   17.13    0.97
   1   4  -5   15.88    0.92
   1   4  -5   15.94    0.96
   1   4  -5   13.46    0.84
  -1   4   5   15.25    0.92
   1   4  -5   15.04    0.84
  -1   4   5   15.64    0.96
   0  -4   5   24.16    1.45
   0  -4   5   24.52    1.45
   0  -4  -5   24.90    1.44
   0   4   5   24.86    1.43
   0   4   5   24.54    1.35
   0   4  -5   24.02    1.45
   0   4  -5   22.70    1.35
   0   4  -5   23.87    1.43
   0   4   5   26.61    1.39
   0   4   5   26.64    1.35
   0   4  -5   25.92    1.42
   0   4   5   23.59    1.43
   0   4   5   26.40    1.49
   0   4  -5   22.63    1.34
   0   4   5   25.03    1.44
   0   4  -5   25.19    1.49
   0   4   5   23.03    1.38
   0   4   5   25.75    1.43
   0   4  -5   25.47    1.36
   0   4  -5   25.29    1.43
  -1  -4  -5   38.43    2.30
   1  -4   5   41.22    2.39
   1  -4   5   40.84    2.39
  -1  -4  -5   41.37    2.30
   1   4   5   41.54    2.29
   1   4   5   43.05    2.20
  -1   4  -5   40.00    2.39
   1   4   5   43.48    2.25
  -1   4  -5   42.57    2.24
  -1   4  -5   44.02    2.37
   1   4   5   43.35    2.40
   1   4   5   41.20    2.30
   1   4   5   40.49    2.34
  -1   4  -5   38.53    2.22
  -1   4  -5   39.13    2.37
   1   4   5   42.36    2.20
  -1   4  -5   39.10    2.37
   1   4   5   39.72    2.29
  -1   4  -5   44.42    2.42
  -1   4  -5   37.46    2.23
   1   4   5   42.01    2.34
  -2   4  -5   43.71    2.38
   2   4   5   43.52    2.24
  -2   4  -5   42.28    2.25
  -2   4  -5   42.64    2.41
   2   4   5   38.07    2.24
  -2   4  -5   40.06    2.22
  -2   4  -5   38.29    2.41
   2   4   5   41.84    2.29
  -2   4  -5   37.49    2.39
   3   4   5    3.25    0.27
  -3   4  -5    3.88    0.28
  -3   4  -5    3.59    0.28
   3   4   5    2.56    0.22
  -3   4  -5    3.29    0.29
   3   4   5    3.37    0.28
  -4   4  -5  209.70   11.67
   4   4   5  213.51   11.19
  -4   4  -5  204.63   11.62
  -4   4  -5  210.13   11.00
   4   4   5  177.05   11.04
   4   4   5  218.07   10.90
  -5   4  -5    0.73    0.16
   5   4   5    0.67    0.07
   5   4   5    0.69    0.07
   5   4   5    0.63    0.07
   5   4   5    0.67    0.07
  -5   4  -5    0.60    0.16
  -5   4  -5    0.59    0.13
   5   4   5    0.69    0.17
   6   4   5    4.77    0.24
   6   4   5    4.52    0.31
   6   4   5    5.20    0.34
  -6   4  -5    4.57    0.41
   6   4   5    5.00    0.29
   6   4   5    4.48    0.29
   6   4   5    4.66    0.24
   6   4   5    4.83    0.28
  -6   4  -5    5.15    0.41
   6   4   5    4.69    0.32
   6   4   5    4.96    0.31
  -6   4  -5    4.49    0.40
  -7   4  -5   22.90    1.33
   7   4   5   25.04    1.36
  -7   4  -5   23.88    1.59
   7   4   5   28.12    1.57
   7   4   5   23.95    1.22
   7   4   5   24.76    1.45
   7   4   5   25.75    1.30
  -7   4  -5   24.54    1.52
   7   4   5   24.92    1.17
   7   4   5   25.31    1.46
   8   4   5    0.50    0.05
   8   4   5    0.44    0.08
   8   4   5    0.51    0.08
   8   4   5    0.62    0.13
   8   4   5    0.63    0.08
   8   4   5    0.67    0.07
   9   4   5    5.73    0.42
   9   4   5    5.84    0.35
   9   4   5    5.74    0.30
  10   4   5    0.49    0.12
  10   4   5    0.34    0.08
  11   4   5    1.21    0.16
  12   4   5    1.27    0.16
  13   4   5    0.85    0.12
  14   4   5    0.20    0.07
  13   5  -5    0.17    0.07
  13   5  -5    0.34    0.11
  12   5  -5    0.44    0.10
  12   5  -5    0.20    0.12
  11   5  -5    6.28    0.44
  11   5  -5    6.47    0.41
  10   5  -5    7.60    0.51
  10   5  -5    8.21    0.49
   8   5  -5   28.06    1.51
   8   5  -5   26.74    1.47
  -8   5   5   27.62    1.35
   8   5  -5   27.25    1.39
  -8   5   5   26.70    1.64
   8   5  -5   26.00    1.63
  -8   5   5   26.02    1.64
   8   5  -5   25.47    1.25
   8   5  -5   25.90    1.56
   7   5  -5    0.21    0.10
   7   5  -5    0.25    0.08
   7   5  -5    0.15    0.08
   7   5  -5    0.11    0.07
   7   5  -5    0.14    0.11
  -7   5   5   -0.02    0.11
   7   5  -5    0.11    0.04
   7   5  -5    0.02    0.10
  -6   5   5    2.90    0.33
   6   5  -5    2.32    0.13
  -6   5   5    2.97    0.19
   6   5  -5    2.64    0.31
   6   5  -5    2.53    0.19
  -6   5   5    2.04    0.15
   6   5  -5    2.38    0.20
  -6   5   5    2.43    0.31
   6   5  -5    2.32    0.21
   6   5  -5    2.32    0.19
   6   5  -5    2.45    0.18
   6   5  -5    2.48    0.28
  -6   5   5    2.92    0.31
  -6   5   5    1.98    0.18
   6   5  -5    2.24    0.17
   5   5  -5    4.00    0.36
  -5   5   5    3.68    0.23
   5   5  -5    3.94    0.26
   5   5  -5    3.55    0.36
   5   5  -5    3.55    0.26
   5   5  -5    3.98    0.23
   5   5  -5    3.43    0.18
  -5   5   5    3.80    0.36
  -5   5   5    4.37    0.38
   5   5  -5    3.61    0.25
  -5   5   5    4.26    0.35
  -4   5   5    4.64    0.37
  -4   5   5    4.45    0.39
   4   5  -5    3.27    0.33
  -4   5   5    5.15    0.38
   4   5  -5    4.65    0.37
   4   5  -5    3.52    0.37
  -4   5   5    4.61    0.39
   3   5  -5  100.60    5.31
  -3   5   5   95.93    5.53
  -3   5   5   91.80    5.21
  -3   5   5  100.05    5.23
  -3   5   5   99.25    5.55
   3   5  -5   92.69    5.53
   2   5  -5    9.49    0.61
  -2   5   5    9.59    0.64
   2   5  -5    8.15    0.52
  -2   5   5    8.53    0.58
  -2   5   5    9.15    0.56
  -2   5   5    9.12    0.58
   2   5  -5    9.26    0.63
   1   5  -5    0.17    0.06
   1   5  -5    0.31    0.10
  -1   5   5    0.17    0.06
  -1   5   5    0.29    0.07
  -1   5   5    0.18    0.07
  -1   5   5    0.22    0.08
   1   5  -5    0.36    0.13
  -1   5   5    0.22    0.12
  -1   5   5    0.21    0.07
   0   5   5    2.40    0.23
   0   5  -5    3.26    0.21
   0   5   5    2.75    0.20
   0   5  -5    2.88    0.20
   0   5  -5    2.76    0.22
   0   5   5    2.51    0.22
   0   5   5    3.05    0.27
   0   5   5    2.73    0.19
   0   5  -5    2.61    0.25
   0   5  -5    3.41    0.30
   0   5  -5    3.02    0.21
   0   5   5    2.94    0.28
   0   5   5    2.87    0.19
   0   5  -5    3.29    0.21
   0   5  -5    3.52    0.28
   0   5   5    2.99    0.20
  -1   5  -5    0.09    0.07
   1   5   5    0.06    0.07
  -1   5  -5   -0.03    0.06
  -1   5  -5   -0.01    0.07
   1   5   5   -0.04    0.08
   1   5   5    0.04    0.10
  -1   5  -5    0.09    0.09
   2   5   5    4.64    0.37
  -2   5  -5    4.04    0.32
  -2   5  -5    4.21    0.32
  -2   5  -5    4.81    0.34
   2   5   5    4.14    0.34
   2   5   5    4.15    0.34
  -2   5  -5    4.88    0.40
  -3   5  -5    4.80    0.38
  -3   5  -5    4.73    0.43
   3   5   5    5.07    0.40
  -3   5  -5    5.58    0.39
   3   5   5    5.39    0.38
  -3   5  -5    5.32    0.39
  -4   5  -5   25.80    1.57
  -4   5  -5   25.19    1.49
   4   5   5   27.96    1.48
  -4   5  -5   24.30    1.50
   5   5   5   17.53    0.87
  -5   5  -5   20.16    1.20
   5   5   5   18.21    1.06
  -5   5  -5   18.86    1.15
  -5   5  -5   17.43    0.93
   5   5   5   20.11    1.17
  -5   5  -5   19.46    1.00
   5   5   5   18.26    1.06
   5   5   5   19.20    0.97
   5   5   5   16.99    1.09
   6   5   5    0.55    0.11
  -6   5  -5    0.18    0.10
   6   5   5    0.16    0.06
   6   5   5    0.11    0.04
  -6   5  -5    0.23    0.16
   6   5   5    0.11    0.07
   6   5   5    0.14    0.08
  -6   5  -5    0.13    0.07
  -6   5  -5    0.16    0.07
  -6   5  -5    0.18    0.11
   6   5   5    0.14    0.13
   7   5   5    1.88    0.21
   7   5   5    2.50    0.18
  -7   5  -5    1.40    0.27
   7   5   5    2.41    0.19
  -7   5  -5    1.77    0.30
   7   5   5    2.02    0.12
   8   5   5    6.69    0.39
   8   5   5    6.49    0.46
   8   5   5    6.58    0.33
  -9   5  -5   13.83    0.88
   9   5   5   16.08    0.92
   9   5   5   14.71    0.79
  10   5   5    0.57    0.15
 -10   5  -5    0.48    0.11
  10   5   5    0.62    0.11
  11   5   5    0.12    0.09
  12   5   5    0.64    0.14
  13   5   5    9.86    0.60
  13   6  -5    0.97    0.11
 -13   6   5    1.11    0.12
  12   6  -5    8.60    0.55
  12   6  -5    9.03    0.52
  11   6  -5   14.73    0.92
  11   6  -5   15.63    0.87
  10   6  -5   54.52    2.84
  10   6  -5   50.92    3.02
   9   6  -5    4.92    0.34
   9   6  -5    5.10    0.38
   8   6  -5   10.01    0.84
   8   6  -5   12.67    0.66
  -8   6   5   11.91    0.87
   8   6  -5   12.66    0.71
   8   6  -5   11.92    0.74
   6   6  -5   11.42    0.64
   6   6  -5   11.32    0.60
  -6   6   5   10.02    0.66
  -6   6   5   11.59    0.80
   6   6  -5   11.00    0.71
   6   6  -5   11.46    0.79
   6   6  -5   10.87    0.63
   6   6  -5   11.44    0.69
   5   6  -5    4.51    0.31
   5   6  -5    4.72    0.43
   5   6  -5    4.63    0.33
  -5   6   5    3.98    0.30
   5   6  -5    4.40    0.28
  -5   6   5    4.67    0.25
   5   6  -5    4.59    0.30
  -5   6   5    5.05    0.42
  -5   6   5    5.18    0.28
  -5   6   5    5.29    0.46
   5   6  -5    4.46    0.33
   4   6  -5    2.08    0.26
  -4   6   5    2.08    0.25
  -4   6   5    2.49    0.31
  -4   6   5    1.97    0.17
  -4   6   5    1.96    0.20
   4   6  -5    2.56    0.19
  -4   6   5    1.94    0.13
   4   6  -5    1.91    0.18
  -4   6   5    2.38    0.15
   4   6  -5    1.92    0.25
  -4   6   5    2.05    0.19
  -4   6   5    2.18    0.27
   4   6  -5    2.11    0.15
   4   6  -5    2.54    0.18
  -4   6   5    2.35    0.26
   4   6  -5    1.99    0.17
  -3   6   5   17.15    1.06
   3   6  -5   18.42    1.02
   3   6  -5   19.47    1.15
   3   6  -5   18.33    1.08
  -3   6   5   19.74    1.21
   3   6  -5   17.63    1.17
  -3   6   5   18.70    1.14
  -3   6   5   19.58    1.14
  -3   6   5   19.09    1.08
  -3   6   5   18.28    0.92
  -3   6   5   18.53    0.88
   3   6  -5   17.95    0.99
  -3   6   5   17.16    1.16
   2   6  -5    3.45    0.33
  -2   6   5    3.00    0.25
  -2   6   5    2.95    0.31
   2   6  -5    3.60    0.33
  -2   6   5    2.97    0.21
  -2   6   5    2.52    0.16
   2   6  -5    3.47    0.22
   2   6  -5    3.05    0.21
  -2   6   5    2.62    0.24
  -2   6   5    3.18    0.32
  -2   6   5    3.14    0.24
  -2   6   5    2.71    0.16
  -1   6   5    0.37    0.07
  -1   6   5    0.37    0.07
  -1   6   5    0.38    0.15
   1   6  -5    0.44    0.15
   1   6  -5    0.55    0.16
  -1   6   5    0.42    0.12
  -1   6   5    0.33    0.07
  -1   6   5    0.36    0.07
   0   6  -5    6.29    0.37
   0   6  -5    6.84    0.36
   0   6  -5    6.57    0.36
   0   6  -5    6.12    0.37
   0   6  -5    8.11    0.56
   1   6   5    1.00    0.18
  -1   6  -5    1.03    0.12
   1   6   5    1.10    0.16
  -1   6  -5    1.08    0.22
  -1   6  -5    1.02    0.12
  -1   6  -5    1.04    0.13
  -1   6  -5    0.86    0.14
   2   6   5    1.05    0.17
  -2   6  -5    1.02    0.16
   2   6   5    0.95    0.17
  -2   6  -5    1.22    0.09
   2   6   5    1.20    0.13
   2   6   5    1.20    0.14
  -2   6  -5    1.33    0.22
  -2   6  -5    1.41    0.18
  -2   6  -5    1.25    0.13
   2   6   5    1.05    0.11
   2   6   5    1.10    0.12
  -2   6  -5    1.30    0.15
  -2   6  -5    1.19    0.14
  -2   6  -5    1.29    0.13
  -2   6  -5    1.22    0.09
   3   6   5   10.77    0.58
  -3   6  -5   11.41    0.72
  -3   6  -5   11.03    0.69
  -3   6  -5   10.01    0.56
  -3   6  -5   10.14    0.52
   3   6   5   11.00    0.70
  -3   6  -5   10.90    0.77
  -3   6  -5   10.37    0.69
   3   6   5   10.73    0.63
  -3   6  -5   10.21    0.54
   3   6   5   10.56    0.71
   3   6   5   10.35    0.62
  -3   6  -5   11.06    0.65
  -3   6  -5   10.30    0.59
   3   6   5   11.71    0.70
  -4   6  -5    3.85    0.27
  -4   6  -5    4.12    0.25
   4   6   5    4.47    0.35
   4   6   5    4.73    0.32
  -4   6  -5    4.49    0.38
  -4   6  -5    4.27    0.23
   4   6   5    4.64    0.27
   4   6   5    3.67    0.28
  -4   6  -5    4.24    0.31
   4   6   5    4.37    0.29
   4   6   5    3.97    0.28
   4   6   5    4.21    0.29
  -4   6  -5    4.42    0.38
  -4   6  -5    3.96    0.36
  -4   6  -5    4.40    0.25
   5   6   5    0.60    0.17
  -5   6  -5    0.44    0.15
  -5   6  -5    0.29    0.15
   5   6   5    0.49    0.10
  -5   6  -5    0.30    0.14
   5   6   5    0.56    0.08
   5   6   5    0.55    0.10
   5   6   5    0.53    0.08
  -5   6  -5    0.41    0.11
  -5   6  -5    0.38    0.16
   5   6   5    0.53    0.11
   6   6   5    3.02    0.21
   6   6   5    3.08    0.24
   6   6   5    2.81    0.25
  -6   6  -5    3.01    0.36
  -6   6  -5    2.91    0.25
  -6   6  -5    2.39    0.33
   6   6   5    3.12    0.20
  -6   6  -5    2.97    0.36
   7   6   5    1.08    0.12
  -7   6  -5    1.06    0.14
  -7   6  -5    0.82    0.23
  -7   6  -5    1.32    0.27
   7   6   5    0.96    0.13
   7   6   5    0.76    0.05
   7   6   5    0.99    0.14
   8   6   5    8.50    0.55
  -8   6  -5    8.24    0.52
  -8   6  -5    7.02    0.66
   8   6   5    8.65    0.47
   9   6   5    6.91    0.41
  -9   6  -5    6.96    0.46
   9   6   5    7.29    0.49
 -10   6  -5    0.15    0.10
  10   6   5    0.25    0.09
  10   6   5    0.20    0.13
  11   6   5    4.79    0.34
  12   6   5   11.45    0.69
 -12   7   5    2.22    0.19
  12   7  -5    2.17    0.18
  12   7  -5    2.40    0.17
  11   7  -5   11.79    0.67
 -11   7   5    9.98    0.72
  11   7  -5   10.91    0.63
  10   7  -5   13.46    0.76
  10   7  -5   13.45    0.82
 -10   7   5   13.06    0.88
   9   7  -5   17.10    0.91
   9   7  -5   16.05    0.96
  -9   7   5   14.32    1.03
  -8   7   5    9.18    0.66
   8   7  -5    9.55    0.59
   8   7  -5    9.77    0.62
  -8   7   5    9.81    0.52
   7   7  -5    7.77    0.51
  -7   7   5    8.00    0.56
   7   7  -5    7.60    0.48
   7   7  -5    7.91    0.44
   7   7  -5    6.90    0.45
  -7   7   5    7.00    0.62
  -6   7   5    2.04    0.15
  -6   7   5    2.15    0.24
  -6   7   5    1.97    0.19
  -6   7   5    2.01    0.32
  -6   7   5    2.11    0.15
   6   7  -5    1.99    0.19
   6   7  -5    1.84    0.19
  -6   7   5    2.08    0.28
   6   7  -5    2.27    0.21
   6   7  -5    2.12    0.18
   6   7  -5    2.04    0.30
   5   7  -5    7.28    0.66
   5   7  -5    8.64    0.55
   5   7  -5    8.64    0.52
  -5   7   5    9.19    0.55
  -5   7   5    9.19    0.62
  -5   7   5    8.53    0.70
  -5   7   5    9.64    0.45
   5   7  -5    8.71    0.53
   5   7  -5    7.78    0.48
  -4   7   5    4.90    0.38
   4   7  -5    4.44    0.31
   4   7  -5    4.95    0.47
   4   7  -5    4.56    0.29
  -4   7   5    4.86    0.45
  -4   7   5    5.08    0.34
  -4   7   5    5.23    0.27
   4   7  -5    4.93    0.32
   4   7  -5    4.99    0.33
   4   7  -5    5.35    0.35
  -3   7   5    6.34    0.52
  -3   7   5    5.92    0.31
   3   7  -5    5.89    0.39
   3   7  -5    5.28    0.37
   3   7  -5    5.89    0.37
  -3   7   5    5.85    0.30
  -3   7   5    5.93    0.42
  -3   7   5    5.95    0.43
   3   7  -5    5.59    0.48
   3   7  -5    5.79    0.37
  -3   7   5    6.10    0.51
  -3   7   5    5.87    0.39
  -2   7   5    0.17    0.07
   2   7  -5    0.25    0.07
  -2   7   5    0.21    0.09
   2   7  -5    0.18    0.08
  -2   7   5    0.20    0.05
  -2   7   5    0.18    0.07
  -2   7   5    0.12    0.06
   2   7  -5    0.19    0.05
   2   7  -5    0.33    0.17
  -2   7   5    0.29    0.09
  -2   7   5    0.09    0.10
   2   7  -5    0.21    0.06
   2   7  -5    0.37    0.09
   1   7  -5    9.55    0.54
  -1   7   5    9.46    0.62
  -1   7   5    8.08    0.50
   1   7  -5    9.06    0.70
  -1   7   5    9.11    0.52
  -1   7   5    9.45    0.57
  -1   7   5    9.70    0.72
  -1   7   5    9.21    0.64
   1   7  -5    8.70    0.56
  -1   7   5   10.18    0.55
  -1   7   5    8.82    0.44
   1   7  -5    9.56    0.52
   1   7  -5    8.69    0.56
   0   7   5    4.40    0.29
   0   7   5    4.18    0.22
   0   7   5    4.45    0.39
   0   7  -5    4.32    0.30
   0   7   5    4.15    0.28
   0   7  -5    4.54    0.30
   0   7   5    4.35    0.27
   0   7   5    5.11    0.46
   0   7   5    4.50    0.33
   0   7  -5    4.49    0.30
   0   7  -5    4.75    0.30
   0   7  -5    4.71    0.29
   0   7   5    4.63    0.31
   1   7   5   12.37    0.68
   1   7   5   12.41    0.79
   1   7   5   11.96    0.66
  -1   7  -5   10.15    0.78
   1   7   5   13.02    0.73
   1   7   5   12.54    0.80
  -1   7  -5   12.44    0.71
   1   7   5   13.33    0.89
  -1   7  -5   11.55    0.73
   1   7   5   13.24    0.72
   1   7   5   11.40    0.57
  -1   7  -5   12.65    0.69
  -1   7  -5   12.91    0.89
  -1   7  -5   12.59    0.70
  -2   7  -5    7.84    0.59
   2   7   5    8.78    0.50
  -2   7  -5    9.02    0.58
   2   7   5    9.61    0.61
  -2   7  -5    9.01    0.46
  -2   7  -5    9.20    0.57
   2   7   5    9.88    0.56
  -2   7  -5    9.33    0.52
   2   7   5    8.89    0.52
   2   7   5    9.66    0.62
  -2   7  -5    8.95    0.56
   2   7   5    9.15    0.54
   3   7   5    1.06    0.15
  -3   7  -5    1.29    0.15
  -3   7  -5    1.19    0.12
  -3   7  -5    1.10    0.18
  -3   7  -5    0.88    0.13
  -3   7  -5    1.07    0.11
   3   7   5    0.99    0.11
   3   7   5    0.98    0.17
   3   7   5    0.99    0.11
   3   7   5    1.17    0.13
  -3   7  -5    1.02    0.16
  -4   7  -5   10.00    0.60
   4   7   5    7.98    0.58
  -4   7  -5    9.57    0.50
   4   7   5   10.09    0.63
   4   7   5    9.96    0.53
  -4   7  -5    9.32    0.65
  -4   7  -5    9.08    0.63
   4   7   5    9.55    0.58
  -4   7  -5   10.11    0.67
   4   7   5    8.69    0.63
  -4   7  -5   10.01    0.54
   5   7   5    0.96    0.12
   5   7   5    0.97    0.13
   5   7   5    0.96    0.14
   5   7   5    1.00    0.13
  -5   7  -5    1.00    0.15
   5   7   5    1.07    0.13
  -5   7  -5    1.03    0.14
   6   7   5    0.08    0.06
   6   7   5    0.02    0.06
   6   7   5    0.04    0.07
  -6   7  -5   -0.07    0.09
  -6   7  -5    0.06    0.08
   6   7   5    0.08    0.09
   7   7   5   11.07    0.60
  -7   7  -5   10.47    0.67
   7   7   5   10.45    0.69
   7   7   5   11.77    0.73
   8   7   5    1.59    0.18
  -8   7  -5    1.81    0.18
   8   7   5    1.88    0.16
   9   7   5    0.80    0.15
  -9   7  -5    0.57    0.12
   9   7   5    0.41    0.08
  10   7   5    1.91    0.17
 -10   7  -5    1.67    0.12
 -10   7  -5    1.84    0.19
 -10   7  -5    1.89    0.18
  10   7   5    1.71    0.21
 -11   7  -5    1.44    0.14
  11   7   5    1.79    0.17
  12   7   5    2.05    0.16
 -11   8   5    4.40    0.34
  11   8  -5    5.43    0.33
  11   8  -5    5.00    0.30
  10   8  -5    0.93    0.12
  10   8  -5    0.71    0.11
 -10   8   5    0.80    0.12
   9   8  -5    1.04    0.16
  -9   8   5    1.43    0.18
  -9   8   5    1.16    0.12
   9   8  -5    1.31    0.15
  -8   8   5    0.46    0.12
   8   8  -5    0.39    0.10
   8   8  -5    0.38    0.10
   7   8  -5    5.13    0.34
  -7   8   5    4.97    0.39
   7   8  -5    4.94    0.30
   7   8  -5    4.56    0.31
   7   8  -5    4.85    0.33
  -7   8   5    4.42    0.33
   6   8  -5    0.03    0.07
   6   8  -5    0.10    0.10
   6   8  -5    0.02    0.07
  -6   8   5    0.16    0.11
  -6   8   5    0.08    0.06
   6   8  -5    0.10    0.07
  -6   8   5    0.04    0.07
   5   8  -5   17.17    0.96
   5   8  -5   17.51    0.94
  -5   8   5   16.72    1.00
  -5   8   5   15.63    1.13
  -5   8   5   17.83    1.12
   5   8  -5   17.37    1.02
  -5   8   5   17.57    0.82
   5   8  -5   15.54    0.89
   4   8  -5    5.80    0.38
   4   8  -5    5.48    0.37
   4   8  -5    5.91    0.39
  -4   8   5    5.84    0.43
  -4   8   5    5.13    0.50
  -4   8   5    6.25    0.31
  -4   8   5    5.73    0.38
   4   8  -5    5.62    0.39
  -3   8   5   50.67    3.15
  -3   8   5   51.05    2.78
   3   8  -5   51.85    2.74
  -3   8   5   53.79    2.38
  -3   8   5   51.07    2.87
   3   8  -5   48.00    2.85
  -3   8   5   48.55    2.88
   3   8  -5   52.00    2.67
   3   8  -5   50.75    2.92
  -2   8   5   24.17    1.55
  -2   8   5   25.35    1.63
   2   8  -5   25.60    1.48
   2   8  -5   26.47    1.39
  -2   8   5   26.52    1.22
   2   8  -5   26.81    1.42
   2   8  -5   26.00    1.51
  -2   8   5   26.12    1.44
  -2   8   5   25.40    1.49
  -1   8   5   51.41    2.81
   1   8  -5   52.58    2.68
   1   8  -5   52.64    2.61
  -1   8   5   47.01    2.80
  -1   8   5   47.79    2.32
  -1   8   5   50.27    3.08
  -1   8   5   51.00    2.61
   1   8  -5   47.97    2.85
   1   8  -5   47.30    2.80
   0   8   5    1.15    0.15
   0   8   5    1.15    0.14
   0   8   5    1.02    0.12
   0   8  -5    1.06    0.13
   0   8   5    0.94    0.06
   0   8  -5    1.03    0.12
   0   8   5    0.97    0.14
   0   8   5    0.79    0.20
   0   8  -5    0.89    0.07
   0   8  -5    0.88    0.14
   1   8   5    2.38    0.23
  -1   8  -5    2.31    0.19
   1   8   5    2.42    0.21
   1   8   5    2.42    0.19
   1   8   5    1.86    0.28
  -1   8  -5    2.24    0.20
  -1   8  -5    2.39    0.15
   1   8   5    2.58    0.21
   1   8   5    2.58    0.22
  -2   8  -5    1.69    0.20
  -2   8  -5    1.60    0.18
  -2   8  -5    1.63    0.12
   2   8   5    1.58    0.25
   2   8   5    1.58    0.16
  -2   8  -5    1.26    0.16
   2   8   5    1.70    0.17
   2   8   5    1.47    0.15
   2   8   5    1.72    0.17
   2   8   5    1.80    0.16
   3   8   5   25.27    1.26
   3   8   5   21.35    1.41
  -3   8  -5   22.71    1.33
   3   8   5   25.41    1.38
  -3   8  -5   24.87    1.39
   3   8   5   25.82    1.51
  -3   8  -5   25.18    1.29
  -3   8  -5   21.82    1.51
   3   8   5   22.82    1.28
  -4   8  -5    0.03    0.06
   4   8   5   -0.04    0.14
   4   8   5    0.02    0.06
   4   8   5   -0.02    0.09
   4   8   5    0.05    0.06
   4   8   5   -0.05    0.06
  -4   8  -5    0.08    0.06
   4   8   5   -0.01    0.07
  -4   8  -5    0.10    0.08
   5   8   5    7.53    0.48
   5   8   5    7.22    0.41
   5   8   5    6.59    0.43
  -5   8  -5    7.11    0.46
   5   8   5    6.26    0.44
  -5   8  -5    6.67    0.49
  -6   8  -5    5.77    0.39
  -6   8  -5    5.62    0.42
   6   8   5    5.87    0.38
   6   8   5    5.00    0.38
   6   8   5    6.19    0.35
   6   8   5    5.82    0.42
   7   8   5   11.63    0.73
  -7   8  -5   10.70    0.77
   7   8   5   12.19    0.77
   7   8   5   12.57    0.64
  -7   8  -5   11.42    0.71
  -8   8  -5    0.07    0.08
   8   8   5    0.03    0.09
  -8   8  -5    0.04    0.08
   8   8   5    0.16    0.11
  -9   8  -5   16.03    1.14
  -9   8  -5   18.33    1.05
   9   8   5   20.20    0.96
  10   8   5    0.15    0.10
 -10   8  -5    0.17    0.06
  10   9  -5    3.02    0.21
  10   9  -5    2.85    0.19
 -10   9   5    2.70    0.22
   9   9  -5    2.99    0.22
  -9   9   5    2.82    0.24
   9   9  -5    3.15    0.23
   8   9  -5    2.56    0.20
   8   9  -5    2.39    0.20
  -8   9   5    2.52    0.22
   7   9  -5    1.23    0.15
   7   9  -5    1.23    0.14
  -7   9   5    1.39    0.16
  -7   9   5    1.19    0.13
   7   9  -5    1.27    0.15
  -6   9   5    0.97    0.13
   6   9  -5    1.06    0.14
  -6   9   5    0.82    0.15
   6   9  -5    1.19    0.16
   6   9  -5    1.17    0.14
  -6   9   5    1.08    0.12
  -5   9   5    6.02    0.45
  -5   9   5    5.35    0.38
   5   9  -5    5.99    0.40
   5   9  -5    5.72    0.37
   5   9  -5    5.97    0.38
   4   9  -5    0.04    0.10
   4   9  -5    0.04    0.08
   4   9  -5   -0.09    0.10
  -4   9   5   -0.04    0.07
   4   9  -5   -0.05    0.06
  -4   9   5    0.05    0.08
   3   9  -5   16.08    0.99
  -3   9   5   17.50    1.11
  -3   9   5   17.68    1.01
   3   9  -5   16.89    0.94
   3   9  -5   16.98    0.96
   3   9  -5   16.94    1.01
   2   9  -5    6.10    0.40
  -2   9   5    6.47    0.43
   2   9  -5    5.77    0.40
   2   9  -5    5.57    0.40
  -2   9   5    6.42    0.46
   1   9  -5   19.29    1.07
   1   9  -5   19.02    1.15
  -1   9   5   20.83    1.27
  -1   9   5   17.18    1.23
  -1   9   5   21.63    1.16
   1   9  -5   19.46    1.10
   0   9  -5   16.48    0.89
   0   9   5   15.90    1.03
   0   9   5   15.23    0.94
   0   9  -5   15.82    0.94
   1   9   5   17.50    0.97
  -1   9  -5   18.28    0.97
  -1   9  -5   17.05    0.83
   1   9   5   18.61    1.05
  -1   9  -5   18.04    1.05
   1   9   5   16.66    0.93
   1   9   5   18.07    1.14
   2   9   5    2.57    0.22
  -2   9  -5    2.95    0.16
   2   9   5    2.50    0.23
  -2   9  -5    2.77    0.23
   2   9   5    2.43    0.23
   2   9   5    2.53    0.22
   2   9   5    2.53    0.19
  -2   9  -5    2.62    0.24
  -3   9  -5   18.44    1.08
   3   9   5   18.07    0.98
   3   9   5   16.84    1.00
  -3   9  -5   18.53    0.88
  -3   9  -5   19.32    1.01
   3   9   5   18.79    1.18
   3   9   5   18.74    1.08
  -4   9  -5    2.16    0.21
   4   9   5    2.30    0.17
  -4   9  -5    2.03    0.19
   4   9   5    2.31    0.22
   4   9   5    2.26    0.21
   4   9   5    1.71    0.17
  -5   9  -5    9.94    0.72
   5   9   5   10.74    0.66
   5   9   5   11.80    0.73
   5   9   5   11.32    0.60
  -5   9  -5   11.28    0.68
   6   9   5    2.97    0.23
  -6   9  -5    2.97    0.24
  -6   9  -5    2.60    0.24
   6   9   5    3.07    0.22
   7   9   5    4.34    0.25
  -7   9  -5    3.15    0.27
   7   9   5    3.69    0.26
  -7   9  -5    4.01    0.30
   8   9   5    0.85    0.11
  -8   9  -5    0.56    0.10
   8   9   5    0.88    0.10
  -9   9  -5    0.18    0.06
   8  10  -5    0.60    0.09
   8  10  -5    0.55    0.08
  -8  10   5    0.60    0.09
  -7  10   5    8.20    0.57
   7  10  -5    8.84    0.53
   7  10  -5    8.68    0.50
  -6  10   5   -0.04    0.07
  -6  10   5    0.04    0.06
   6  10  -5    0.05    0.06
   6  10  -5   -0.02    0.07
   6  10  -5    0.07    0.09
  -5  10   5    6.41    0.44
   5  10  -5    5.90    0.40
  -5  10   5    6.01    0.40
   5  10  -5    6.18    0.38
   5  10  -5    6.29    0.37
  -4  10   5    3.81    0.29
   4  10  -5    3.85    0.26
  -4  10   5    3.72    0.30
   4  10  -5    3.33    0.25
   4  10  -5    3.74    0.26
   3  10  -5    0.53    0.09
  -3  10   5    0.49    0.13
   3  10  -5    0.64    0.11
   3  10  -5    0.57    0.11
  -3  10   5    0.72    0.12
  -2  10   5   26.21    1.53
   2  10  -5   25.13    1.51
  -2  10   5   27.76    1.68
   2  10  -5   27.39    1.43
   1  10  -5   44.28    2.27
  -1  10   5   42.35    2.43
  -1  10   5   44.01    2.67
   1  10  -5   41.48    2.42
   0  10   5   21.26    1.36
   0  10   5   21.44    1.25
   0  10  -5   21.09    1.24
   0  10  -5   21.68    1.16
  -1  10  -5    7.89    0.48
  -1  10  -5    7.11    0.49
   1  10   5    7.33    0.53
   1  10   5    8.75    0.51
   2  10   5   13.89    0.89
   2  10   5   12.47    0.72
  -2  10  -5   14.12    0.82
   2  10   5   14.20    0.82
  -3  10  -5    3.78    0.29
   3  10   5    4.01    0.28
   3  10   5    3.68    0.25
   3  10   5    4.02    0.30
   4  10   5    3.23    0.25
   4  10   5    2.76    0.23
   4  10   5    3.19    0.22
  -4  10  -5    3.39    0.25
   5  10   5    0.20    0.07
  -5  10  -5    0.16    0.08
   5  10   5    0.25    0.09
   5  10   5    0.23    0.07
   6  10   5    2.15    0.19
   6  10   5    2.25    0.16
  -6  10  -5    2.37    0.21
  -7  10  -5    2.19    0.18
   7  10   5    2.12    0.17
  -8  10  -5    1.78    0.14
  -6  11   5    0.07    0.05
  -5  11   5    1.30    0.13
  -5  11   5    1.31    0.12
   5  11  -5    1.21    0.12
   4  11  -5    3.65    0.26
  -4  11   5    3.68    0.28
  -4  11   5    3.93    0.27
   3  11  -5    3.42    0.24
   3  11  -5    3.51    0.25
  -3  11   5    3.83    0.26
  -3  11   5    3.93    0.28
   2  11  -5    2.40    0.19
   2  11  -5    2.21    0.18
  -2  11   5    2.68    0.23
  -2  11   5    2.45    0.22
  -1  11   5    2.22    0.22
   1  11  -5    2.61    0.23
   1  11  -5    2.64    0.20
  -1  11   5    2.64    0.23
   0  11  -5    2.46    0.19
   0  11   5    2.07    0.21
   0  11   5    2.31    0.20
   1  11   5    1.44    0.18
  -1  11  -5    1.62    0.18
   1  11   5    1.03    0.13
  -2  11  -5    6.59    0.42
   2  11   5    6.32    0.45
   2  11   5    6.63    0.42
  -3  11  -5    0.10    0.08
   3  11   5    0.11    0.09
   3  11   5    0.06    0.07
   4  11   5    2.04    0.15
  -4  11  -5    1.83    0.16
   4  11   5    1.49    0.16
  -5  11  -5    0.80    0.10
   5  11   5    0.50    0.08
  -6  11  -5    0.05    0.05
  -2  12   5    0.48    0.07
  -2  12   5    0.22    0.06
  -1  12   5    1.08    0.11
   1  12  -5    1.02    0.10
  -1  12   5    1.21    0.11
   0  12   5    1.36    0.12
   0  12  -5    1.17    0.11
   0  12   5    1.07    0.11
  -1  12  -5    1.28    0.13
   1  12   5    1.95    0.14
   2  12   5    2.83    0.19
  -2  12  -5    2.49    0.19
  15   0  -6    0.07    0.07
  14   0  -6    1.07    0.13
  14   0  -6    0.87    0.10
  13   0  -6    0.08    0.08
  13   0  -6    0.09    0.07
  12   0  -6    4.10    0.31
  11   0  -6   -0.17    0.18
  10   0  -6    0.45    0.08
  10   0  -6    0.40    0.18
  10   0  -6    0.28    0.18
   9   0  -6   -0.06    0.12
   9   0  -6   -0.09    0.06
   8   0  -6    0.52    0.17
   8   0  -6    0.63    0.14
   8   0  -6    0.65    0.09
   8   0  -6    0.54    0.17
   7   0  -6   -0.06    0.09
   7   0  -6    0.10    0.11
   7   0  -6    0.05    0.07
  -6   0   6    1.95    0.33
   6   0  -6    2.24    0.23
   6   0  -6    2.26    0.23
   6   0  -6    2.22    0.22
   6   0  -6    2.03    0.33
   5   0  -6    0.01    0.13
   5   0  -6    0.04    0.08
  -5   0   6    0.14    0.14
   5   0  -6    0.24    0.15
   5   0  -6    0.25    0.09
   5   0  -6    0.09    0.08
  -5   0   6    0.02    0.14
  -4   0   6   24.21    1.45
   4   0  -6   25.55    1.52
  -4   0   6   27.93    1.60
   4   0  -6   27.21    1.45
  -4   0   6   24.10    1.54
   4   0  -6   25.90    1.58
  -4   0   6   26.67    1.58
   4   0  -6   26.40    1.58
   3   0  -6    0.07    0.11
   3   0  -6    0.05    0.07
  -3   0   6    0.02    0.10
  -3   0   6    0.10    0.08
   3   0  -6    0.01    0.05
   3   0  -6    0.22    0.11
   3   0  -6    0.10    0.07
  -3   0   6    0.14    0.08
  -3   0   6    0.14    0.11
  -2   0   6  122.43    7.04
  -2   0   6  127.84    6.90
  -2   0   6  116.96    6.63
   2   0  -6  125.58    6.63
   2   0  -6  128.97    6.90
   2   0  -6  119.38    6.68
   2   0  -6  121.28    7.03
  -2   0   6  128.70    6.90
   2   0  -6  126.19    6.90
   1   0  -6   -0.06    0.03
   1   0  -6   -0.03    0.06
  -1   0   6    0.01    0.03
  -1   0   6   -0.04    0.07
  -1   0   6   -0.03    0.03
  -1   0   6   -0.07    0.05
   1   0  -6   -0.06    0.04
   1   0  -6   -0.03    0.05
  -1   0   6   -0.06    0.04
   0   0  -6   20.70    1.16
   0   0   6   21.46    1.16
   0   0   6   22.52    1.24
   0   0  -6   21.52    1.24
   0   0   6   21.40    1.25
   0   0  -6   20.64    1.23
   0   0   6   19.80    1.13
   0   0   6   21.84    1.23
   0   0  -6   22.79    1.25
   0   0  -6   19.96    1.15
  -1   0  -6   -0.09    0.07
  -1   0  -6   -0.01    0.05
   1   0   6    0.01    0.04
   1   0   6    0.03    0.04
   1   0   6   -0.04    0.05
  -1   0  -6   -0.05    0.03
  -1   0  -6   -0.04    0.05
   1   0   6   -0.02    0.06
   1   0   6   -0.10    0.07
  -2   0  -6   26.41    1.47
  -2   0  -6   24.01    1.36
  -2   0  -6   22.32    1.44
   2   0   6   23.39    1.44
   2   0   6   24.50    1.47
   2   0   6   25.58    1.36
  -2   0  -6   25.91    1.48
   2   0   6   25.84    1.46
  -3   0  -6   -0.03    0.05
  -3   0  -6   -0.01    0.07
  -3   0  -6    0.17    0.09
  -3   0  -6    0.08    0.05
   3   0   6   -0.04    0.06
   3   0   6    0.11    0.09
   3   0   6    0.05    0.05
   3   0   6    0.03    0.05
   3   0   6    0.03    0.07
   4   0   6   10.20    0.60
   4   0   6    9.79    0.60
   4   0   6   10.17    0.63
  -4   0  -6    9.16    0.60
  -4   0  -6   10.31    0.72
  -4   0  -6    8.55    0.62
  -4   0  -6   10.20    0.71
   4   0   6   10.09    0.71
   4   0   6    8.93    0.70
   5   0   6   -0.02    0.13
   5   0   6    0.08    0.09
   5   0   6    0.17    0.09
   5   0   6    0.01    0.09
  -5   0  -6    0.05    0.13
   5   0   6    0.01    0.15
   6   0   6   28.72    1.64
   6   0   6   27.80    1.71
   7   0   6    0.20    0.14
   7   0   6    0.23    0.13
   7   0   6    0.11    0.09
   8   0   6   71.56    3.75
   8   0   6   79.20    4.49
   8   0   6   77.92    4.01
   8   0   6   80.36    4.23
   8   0   6   69.28    3.57
   8   0   6   82.74    4.29
   9   0   6    0.02    0.05
   9   0   6    0.06    0.16
  10   0   6    4.55    0.52
  10   0   6    5.24    0.45
  10   0   6    5.73    0.37
  11   0   6    0.27    0.13
  12   0   6   13.02    0.70
  12   0   6   13.05    0.80
  12   0   6   13.36    0.74
  13   0   6   -0.06    0.11
  13   0   6    0.12    0.10
  14   0   6    2.78    0.20
  15  -1  -6    3.82    0.27
  15   1  -6    5.08    0.28
  14  -1  -6    9.13    0.51
  14   1  -6    8.45    0.51
  13  -1  -6    2.15    0.19
  13   1  -6    2.59    0.20
  12  -1  -6    9.08    0.50
  12   1  -6    9.21    0.56
  11  -1  -6    0.02    0.20
  11  -1  -6    0.35    0.09
  11   1  -6    0.20    0.20
  11   1  -6    0.09    0.11
  10  -1  -6    3.24    0.22
  10  -1  -6    3.80    0.24
  10  -1  -6    3.44    0.38
  10  -1  -6    3.49    0.39
  10   1  -6    3.29    0.22
  10   1  -6    2.89    0.24
  10   1  -6    3.25    0.40
   9  -1  -6    1.58    0.13
   9  -1  -6    1.30    0.24
   9   1  -6    1.21    0.15
   9   1  -6    1.21    0.11
   9   1  -6    1.48    0.23
   9   1  -6    1.33    0.24
   8  -1  -6    0.09    0.13
   8   1  -6    0.15    0.10
   8   1  -6    0.16    0.11
   8   1  -6    0.06    0.05
   8   1  -6    0.12    0.12
   8   1  -6   -0.04    0.11
   8   1  -6   -0.02    0.06
   7  -1  -6    4.97    0.43
   7  -1  -6    5.42    0.44
   7   1  -6    5.93    0.44
   7   1  -6    5.68    0.42
   7   1  -6    5.71    0.41
   7   1  -6    5.73    0.43
   6  -1  -6   34.72    2.37
   6  -1  -6   39.72    2.30
   6  -1  -6   39.59    2.18
   6   1  -6   39.97    2.19
   6   1  -6   39.64    2.20
   6   1  -6   41.12    2.28
   6   1  -6   40.60    2.16
  -6   1   6   34.85    2.37
   5  -1  -6   21.90    1.29
  -5  -1   6   20.00    1.34
  -5  -1   6   19.99    1.35
   5  -1  -6   18.96    1.37
   5  -1  -6   21.45    1.23
   5  -1  -6   20.33    1.37
   5   1  -6   21.57    1.34
  -5   1   6   20.45    1.23
  -5   1   6   22.06    1.31
  -5   1   6   20.08    1.38
   5   1  -6   22.63    1.24
  -5   1   6   21.66    1.40
   5   1  -6   22.24    1.23
   5   1  -6   18.02    1.32
   5   1  -6   24.05    1.21
   5   1  -6   22.96    1.27
  -4  -1   6   48.93    2.76
   4  -1  -6   48.77    2.61
   4  -1  -6   46.34    2.78
   4  -1  -6   48.26    2.75
  -4  -1   6   42.63    2.75
  -4  -1   6   47.48    2.76
   4  -1  -6   49.33    2.80
   4   1  -6   48.98    2.62
  -4   1   6   47.63    2.79
   4   1  -6   50.77    2.74
   4   1  -6   49.39    2.64
   4   1  -6   45.94    2.74
  -4   1   6   48.04    2.77
   4   1  -6   48.26    2.59
  -4   1   6   45.64    2.61
   4   1  -6   45.52    2.74
  -4   1   6   48.49    2.80
  -3  -1   6   35.12    1.90
   3  -1  -6   33.50    1.93
  -3  -1   6   34.32    1.91
  -3  -1   6   27.90    1.88
   3  -1  -6   32.39    1.79
   3  -1  -6   33.66    1.93
   3  -1  -6   33.76    1.89
   3   1  -6   27.98    1.77
  -3   1   6   32.38    1.90
   3   1  -6   33.54    1.78
   3   1  -6   32.79    1.80
   3   1  -6   32.50    1.88
  -3   1   6   32.46    1.92
  -3   1   6   32.56    1.80
   3   1  -6   32.30    1.89
  -3   1   6   33.79    1.94
   3   1  -6   34.27    1.90
  -2  -1   6  148.76    7.89
   2  -1  -6  138.56    7.91
  -2  -1   6  148.14    7.89
   2  -1  -6  144.02    7.61
   2  -1  -6  150.53    7.92
   2  -1  -6  136.30    8.07
  -2  -1   6  126.33    8.06
  -2   1   6  145.37    7.61
   2   1  -6  145.62    7.63
   2   1  -6  136.89    7.88
   2   1  -6  138.31    7.67
  -2   1   6  139.85    7.91
  -2   1   6  142.74    8.08
   2   1  -6  144.12    8.17
  -2   1   6  153.07    7.92
   1  -1  -6  275.99   15.06
  -1  -1   6  305.18   15.58
   1  -1  -6  299.35   15.51
  -1  -1   6  257.37   15.90
  -1  -1   6  302.16   15.54
  -1  -1   6  258.76   15.04
   1  -1  -6  297.60   15.55
   1  -1  -6  259.78   15.96
  -1   1   6  287.30   15.08
   1   1  -6  278.44   15.14
   1   1  -6  276.23   16.01
   1   1  -6  280.11   15.25
   1   1  -6  256.77   15.98
  -1   1   6  281.16   16.00
  -1   1   6  264.24   14.97
   1   1  -6  295.93   15.55
  -1   1   6  303.99   15.51
  -1   1   6  296.91   15.51
   0  -1  -6  843.05   48.18
   0  -1  -6  788.99   51.10
   0  -1   6  961.11   49.80
   0  -1   6  882.44   51.18
   0  -1   6  865.64   48.15
   0  -1   6  947.34   49.88
   0  -1  -6  932.43   49.79
   0  -1  -6  978.99   49.88
   0   1   6  880.47   47.82
   0   1   6  940.14   49.80
   0   1   6  911.08   51.17
   0   1  -6  905.70   48.63
   0   1   6  793.18   51.13
   0   1  -6  952.36   49.84
   0   1   6  937.68   49.79
   0   1  -6  919.70   48.21
   0   1  -6  916.64   51.20
   0   1  -6  939.79   49.82
   1  -1   6    8.24    0.50
   1  -1   6    8.62    0.55
  -1  -1  -6    8.06    0.53
  -1  -1  -6    7.47    0.50
   1  -1   6    8.62    0.55
   1  -1   6    7.81    0.48
  -1  -1  -6    7.92    0.54
  -1   1  -6    8.31    0.48
   1   1   6    7.86    0.50
  -1   1  -6    8.72    0.54
  -1   1  -6    8.45    0.51
   1   1   6    7.61    0.47
  -1   1  -6    8.69    0.56
   1   1   6    7.88    0.47
   1   1   6    7.76    0.52
   2  -1   6  237.53   12.73
   2  -1   6  251.58   13.20
   2  -1   6  246.46   13.22
  -2  -1  -6  248.69   13.18
  -2  -1  -6  248.77   13.19
  -2  -1  -6  220.48   13.51
   2  -1   6  221.12   13.51
   2   1   6  242.44   13.68
   2   1   6  215.92   12.94
  -2   1  -6  233.50   13.61
   2   1   6  252.95   12.69
  -2   1  -6  255.28   13.22
  -2   1  -6  234.84   12.73
   2   1   6  232.38   13.17
  -2   1  -6  250.51   13.21
   2   1   6  238.29   12.86
   3  -1   6  223.54   12.03
   3  -1   6  232.67   12.52
  -3  -1  -6  239.00   12.49
   3  -1   6  216.17   12.77
  -3  -1  -6  198.90   12.76
  -3  -1  -6  231.78   12.47
   3  -1   6  227.90   12.50
   3  -1   6  218.04   12.28
  -3   1  -6  232.05   12.52
   3   1   6  233.04   12.29
  -3   1  -6  224.53   12.04
  -3   1  -6  237.84   12.51
  -3   1  -6  223.94   12.80
   3   1   6  232.85   12.90
  -3   1  -6  214.30   12.77
   3   1   6  232.60   12.13
   3   1   6  221.82   12.46
   4  -1   6   70.20    3.79
  -4  -1  -6   70.20    3.99
   4  -1   6   67.54    4.03
   4  -1   6   69.55    4.02
  -4  -1  -6   69.94    4.00
   4  -1   6   69.78    4.02
   4  -1   6   70.27    3.84
  -4   1  -6   72.16    4.02
   4   1   6   72.41    4.01
  -4   1  -6   69.04    3.80
   4   1   6   70.84    3.78
   4   1   6   68.92    3.98
   4   1   6   71.19    3.86
  -4   1  -6   69.35    3.97
  -4   1  -6   68.67    4.02
  -4   1  -6   69.72    4.04
   5  -1   6  161.24    8.51
   5  -1   6  151.44    8.90
   5  -1   6  150.93    8.92
   5  -1   6  160.47    9.02
   5  -1   6  155.42    8.62
  -5   1  -6  155.36    8.51
  -5   1  -6  154.58    8.90
  -5   1  -6  156.87    8.92
  -5   1  -6  159.06    9.03
   5   1   6  169.90    9.01
   5   1   6  152.38    8.86
   5   1   6  162.20    8.64
   5   1   6  169.99    8.49
   6  -1   6   86.44    4.74
   6  -1   6   81.38    4.97
   6   1   6   88.38    4.77
   6   1   6   88.62    4.96
   7  -1   6    0.04    0.10
   7  -1   6    0.03    0.09
   7  -1   6    0.04    0.13
   7   1   6    0.14    0.11
   7   1   6    0.09    0.09
   7   1   6    0.08    0.11
   8  -1   6    6.21    0.51
   8  -1   6    5.38    0.49
   8  -1   6    5.36    0.33
   8   1   6    6.00    0.45
   8   1   6    6.30    0.50
   8   1   6    5.86    0.49
   8   1   6    5.35    0.31
   8   1   6    6.12    0.45
   8   1   6    5.95    0.31
   9  -1   6   38.02    1.96
   9  -1   6   31.85    2.28
   9   1   6   37.42    2.27
   9   1   6   38.07    2.14
   9   1   6   38.86    2.14
  10   1   6   18.09    1.09
  11  -1   6    7.12    0.46
  11   1   6    7.25    0.47
  11   1   6    6.68    0.42
  11   1   6    6.87    0.37
  12  -1   6    0.37    0.12
  12   1   6    0.19    0.10
  12   1   6    0.23    0.10
  13  -1   6    3.34    0.26
  13  -1   6    3.33    0.24
  13   1   6    2.82    0.24
  14   1   6    2.69    0.20
  14   1   6    2.84    0.15
  15  -2  -6    0.00    0.06
  15   2  -6   -0.02    0.06
  14  -2  -6   11.47    0.63
  14   2  -6   10.73    0.63
  13   2  -6   13.58    0.77
  12   2  -6    4.64    0.32
  12   2  -6    4.65    0.34
  11  -2  -6   -0.07    0.18
  11   2  -6    0.13    0.09
  11   2  -6    0.22    0.11
  11   2  -6    0.03    0.16
  10   2  -6    5.35    0.34
  10   2  -6    4.30    0.49
  10   2  -6    4.61    0.34
   9   2  -6    0.19    0.16
   9   2  -6    0.13    0.15
   9   2  -6    0.00    0.05
   9   2  -6    0.13    0.09
   9   2  -6    0.05    0.06
   9   2  -6    0.05    0.08
   8   2  -6    0.27    0.07
   8   2  -6    0.15    0.06
   8   2  -6    0.27    0.08
   8   2  -6    0.30    0.15
   8   2  -6    0.28    0.12
   8   2  -6    0.17    0.12
   8   2  -6    0.34    0.14
   8   2  -6    0.52    0.10
   8   2  -6    0.28    0.06
   7  -2  -6    1.96    0.26
   7  -2  -6    1.58    0.22
   7   2  -6    1.83    0.24
   7   2  -6    1.84    0.21
   7   2  -6    1.76    0.22
   7   2  -6    2.15    0.23
   6  -2  -6    0.82    0.29
   6  -2  -6    1.25    0.18
   6  -2  -6    1.09    0.20
  -6   2   6    1.29    0.21
   6   2  -6    1.39    0.19
   6   2  -6    1.38    0.16
   6   2  -6    1.26    0.16
  -6   2   6    1.16    0.19
   6   2  -6    1.67    0.20
   5  -2  -6   12.40    0.93
   5  -2  -6   11.39    0.92
   5  -2  -6   12.66    0.78
   5  -2  -6   12.58    0.81
  -5   2   6   13.20    0.80
  -5   2   6   13.34    0.96
   5   2  -6   10.67    0.83
   5   2  -6   13.09    0.78
   5   2  -6   13.39    0.78
   5   2  -6   13.05    0.74
   5   2  -6   11.48    0.83
   5   2  -6   13.58    0.79
   4  -2  -6   91.66    5.31
   4  -2  -6   94.44    5.30
  -4  -2   6   99.45    5.24
   4  -2  -6   90.25    5.03
   4  -2  -6   96.40    5.33
  -4  -2   6   89.90    5.22
  -4   2   6  103.11    5.35
  -4   2   6   91.40    5.31
   4   2  -6   91.00    5.22
   4   2  -6   99.59    5.30
   4   2  -6   83.87    4.99
   4   2  -6   90.87    5.22
   4   2  -6   87.74    5.30
   4   2  -6   94.00    5.07
   4   2  -6   97.45    5.00
   4   2  -6   99.42    5.11
  -4   2   6   89.62    5.30
  -4   2   6   96.35    5.04
   4   2  -6   85.03    5.26
   3  -2  -6   73.32    4.23
   3  -2  -6   73.84    4.22
  -3  -2   6   74.95    4.15
   3  -2  -6   71.63    3.99
   3  -2  -6   75.77    4.22
  -3  -2   6   76.24    4.15
  -3   2   6   77.20    4.23
   3   2  -6   69.47    4.14
  -3   2   6   75.80    4.00
   3   2  -6   76.84    4.03
  -3   2   6   79.41    4.25
   3   2  -6   71.50    4.21
  -3   2   6   76.20    4.22
   3   2  -6   74.94    4.06
   3   2  -6   75.76    4.20
   3   2  -6   67.81    4.19
   3   2  -6   74.49    4.15
   3   2  -6   64.81    3.96
   3   2  -6   76.80    3.97
   2  -2  -6  124.86    7.52
   2  -2  -6  137.13    7.39
   2  -2  -6  126.85    7.09
   2  -2  -6  133.39    7.39
  -2  -2   6  136.94    7.35
  -2  -2   6  136.21    7.34
   2   2  -6  129.26    7.13
   2   2  -6  128.40    7.51
   2   2  -6  135.67    7.16
   2   2  -6  127.05    7.48
   2   2  -6  133.04    7.34
  -2   2   6  138.57    7.10
   2   2  -6  135.30    7.34
  -2   2   6  128.65    7.04
   2   2  -6  124.19    7.07
  -2   2   6  137.52    7.40
  -2   2   6  132.43    7.38
   2   2  -6  137.67    7.61
  -2   2   6  140.50    7.53
   1  -2  -6   52.65    2.85
   1  -2  -6   45.92    2.86
   1  -2  -6   51.10    2.85
  -1  -2   6   51.93    2.83
  -1  -2   6   53.11    2.83
   1   2  -6   46.32    2.81
   1   2  -6   51.01    2.86
   1   2  -6   52.63    2.74
  -1   2   6   49.92    2.85
  -1   2   6   48.68    2.70
  -1   2   6   46.98    2.69
   1   2  -6   46.50    2.69
  -1   2   6   51.18    2.87
   1   2  -6   52.09    2.83
   1   2  -6   48.73    2.86
   1   2  -6   52.06    2.70
   1   2  -6   52.77    2.86
   0  -2   6  376.01   19.86
   0  -2   6  386.21   19.75
   0  -2  -6  394.87   19.78
   0  -2  -6  386.06   19.89
   0   2  -6  377.90   20.41
   0   2  -6  360.52   19.87
   0   2  -6  336.41   19.12
   0   2   6  333.52   19.17
   0   2   6  371.54   19.79
   0   2  -6  373.01   19.76
   0   2  -6  305.46   18.96
   0   2   6  348.74   19.13
   0   2   6  375.95   19.24
   0   2  -6  354.81   20.43
   0   2  -6  363.54   19.29
   0   2   6  331.93   20.27
   0   2   6  363.61   20.47
   0   2  -6  343.44   20.40
   0   2  -6  367.09   19.51
   0   2   6  340.31   19.73
  -1  -2  -6  175.48    9.05
   1  -2   6  164.67    9.08
  -1  -2  -6  168.16    9.04
   1  -2   6  152.33    8.73
   1  -2   6  171.63    9.07
   1  -2   6  151.94    9.27
  -1   2  -6  170.10    8.83
   1   2   6  159.66    8.71
   1   2   6  151.98    9.25
  -1   2  -6  171.68    9.09
  -1   2  -6  170.83    9.31
  -1   2  -6  163.19    9.07
   1   2   6  172.71    9.38
   1   2   6  166.74    9.04
   1   2   6  168.36    9.05
  -1   2  -6  154.01    9.27
   1   2   6  167.39    8.80
  -1   2  -6  160.32    9.23
  -1   2  -6  170.08    8.82
   1   2   6  154.33    8.72
   1   2   6  158.90    8.88
   2  -2   6  187.52   10.13
   2  -2   6  179.39   10.14
   2  -2   6  172.00    9.74
  -2  -2  -6  194.47   10.08
   2  -2   6  172.62   10.34
  -2  -2  -6  200.17   10.09
   2   2   6  188.84   10.09
  -2   2  -6  179.54   10.34
   2   2   6  192.36    9.66
   2   2   6  169.09   10.31
   2   2   6  171.08    9.72
   2   2   6  156.67    9.80
   2   2   6  184.97   10.07
  -2   2  -6  181.39   10.12
   2   2   6  190.98    9.76
  -2   2  -6  189.39   10.14
  -2   2  -6  188.93    9.75
   2   2   6  185.40    9.91
   2   2   6  181.72   10.45
  -2   2  -6  186.71   10.50
   3  -2   6   43.30    2.59
   3  -2   6   40.38    2.40
  -3  -2  -6   47.45    2.51
   3  -2   6   40.58    2.40
   3  -2   6   41.92    2.56
   3  -2   6   41.81    2.54
  -3  -2  -6   46.38    2.53
  -3   2  -6   43.81    2.41
   3   2   6   49.54    2.38
  -3   2  -6   45.01    2.55
   3   2   6   40.19    2.37
  -3   2  -6   42.91    2.52
   3   2   6   45.42    2.51
  -3   2  -6   43.66    2.57
   3   2   6   40.11    2.51
  -3   2  -6   42.72    2.58
   3   2   6   46.68    2.52
   3   2   6   40.20    2.37
   3   2   6   47.80    2.37
   3   2   6   45.93    2.45
   3   2   6   45.05    2.52
   4  -2   6   51.02    2.88
   4  -2   6   52.33    3.05
   4  -2   6   50.43    3.10
   4  -2   6   53.54    3.09
   4  -2   6   52.86    2.88
  -4  -2  -6   53.19    3.01
  -4  -2  -6   51.04    3.02
   4   2   6   44.86    2.84
   4   2   6   47.30    3.01
   4   2   6   55.77    3.02
   4   2   6   51.16    2.85
  -4   2  -6   56.86    2.89
  -4   2  -6   54.02    3.01
   4   2   6   54.84    2.84
  -4   2  -6   55.62    3.05
   4   2   6   51.09    3.00
   4   2   6   51.47    3.01
   4   2   6   55.13    2.92
  -4   2  -6   55.03    3.11
  -4   2  -6   51.60    3.07
   5  -2   6   20.27    1.23
   5  -2   6   20.41    1.46
   5  -2   6   22.10    1.33
   5  -2   6   21.56    1.26
   5  -2   6   19.20    1.45
[truncated: 1,127,929 more chars]
